# Supplementary material for: Oxidative [3+2] annulation of activated pyridines for the synthesis of indolizinyl sulfonyl fluorides: a class of important pharmacophores
Source: Royal Society of Chemistry journal article supplement (doi:10.1039/d5cc02186c), 2025-01-01
Supplement: d5cc02186c1.pdf [file d5cc02186c1.pdf]

## Supporting Information

### **Oxidative [3+2] Annulation of Activated Pyridines for the Synthesis of IndolizinyI Sulfonyl Fluorides: A Class of Important Pharmacophore**

Sen Zhang<sup>a</sup>, Eman Fayad<sup>b</sup>, Hanadi A. Katouah<sup>c</sup>, Yi-Yong Huang<sup>a</sup>, Hua-Li Qin<sup>\*a</sup>

<sup>a</sup>School of Chemistry, Chemical Engineering and Life Sciences, Wuhan University of Technology, Wuhan 430070, China.

<sup>b</sup>Department of Biotechnology, College of Sciences, Taif University, P.O. Box 11099, Taif 21944, Saudi Arabia.

<sup>c</sup>Chemistry Department, College of Science, Umm Al-Qura University, 21955, Makkah, Saudi Arabia.

\*Corresponding author: Hua-Li Qin

*E-mail:* qinhuali@whut.edu.cn

## Table of Contents

|                                                                                                                          |      |
|--------------------------------------------------------------------------------------------------------------------------|------|
| 1. General Information .....                                                                                             | S1   |
| 2. Optimization of the Reaction Conditions .....                                                                         | S2   |
| 3. Experimental Procedures.....                                                                                          | S10  |
| 3.1 Preparation of activated pyridines ( <b>1</b> ) .....                                                                | S10  |
| 3.2 General procedures for synthesis of activated pyridines <b>1f</b> and <b>1u</b> (with <b>1f</b> as an example) ..... | S10  |
| 3.3 Preparation of $\beta$ -arylethenesulfonyl fluorides ( <b>2</b> ) .....                                              | S11  |
| 3.4 General procedure for synthesis of compounds <b>3</b> , <b>5</b> and <b>10</b> (with <b>3a</b> as an example) .....  | S12  |
| 3.5 General procedure for synthesis of compound <b>6</b> .....                                                           | S12  |
| 3.6 General procedure for synthesis of compound <b>7</b> .....                                                           | S13  |
| 3.7 General procedure for synthesis of compound <b>8</b> .....                                                           | S13  |
| 4. Unsuccessful experiments of activated pyridines and ESF .....                                                         | S14  |
| 5. Characterization .....                                                                                                | S14  |
| 6. References .....                                                                                                      | S31  |
| 7. NMR spectra .....                                                                                                     | S32  |
| 8. Data of Crystal Structure of <b>3s</b> .....                                                                          | S114 |

## 1. General Information

All reactions were carried out under an air atmosphere unless otherwise specified. Reagents used in the reactions were all purchased from commercial sources and used without further purification. Unless otherwise specified, NMR spectra were recorded in CDCl<sub>3</sub> or DMSO-*d*<sub>6</sub> on a 500 MHz (for <sup>1</sup>H), 471 MHz (for <sup>19</sup>F), and 126 MHz (for <sup>13</sup>C) Bruker Avance spectrometer, and were internally referenced to solvent residual signals (note: CDCl<sub>3</sub>:  $\delta$  H = 7.260 ppm,  $\delta$  C = 77.16 ppm; DMSO-*d*<sub>6</sub>:  $\delta$  H = 2.500 ppm,  $\delta$  C = 39.52 ppm). The following abbreviations were used to explain the multiplicities: s = singlet, d = doublet, t = triplet, q = quartet, m = multiplet. All chemical shifts were reported in ppm relative to TMS (0 ppm) as internal standards. The HPLC experiments were carried out on a Waters e2695 instrument (column: J&K, RP-C18, 5  $\mu$ m, 4.6  $\times$  150 mm), and the yields of the products were determined by using the corresponding pure compounds as the external standards. Melting points of the products were measured on a micro melting point apparatus (SGW X-4) and uncorrected. HRMS experiments were performed on a TOF-Q ESI or CI/EI instrument. The coupling constants were reported in Hertz (Hz). The product spots on the thin layer chromatography (TLC) were visualized under ultraviolet light (254 nm or 365 nm) followed by staining with potassium permanganate or phosphomolybdic acid.

## 2. Optimization of the Reaction Conditions

**Table S1** Screening of the base<sup>a</sup>

| 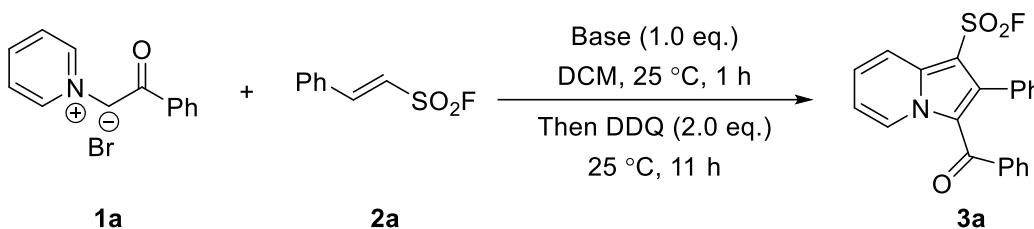 |                                     |                            |
|------------------------------------------------------------------------------------|-------------------------------------|----------------------------|
| Entry                                                                              | Base (1.0 eq.)                      | Yield (3a, %) <sup>b</sup> |
| 1                                                                                  | DBU                                 | 3                          |
| 2                                                                                  | Et <sub>3</sub> N                   | 4                          |
| 3                                                                                  | TMEDA                               | 2                          |
| 4                                                                                  | DIPEA                               | 31                         |
| 5                                                                                  | Na <sub>2</sub> CO <sub>3</sub>     | 13                         |
| 6                                                                                  | NaHCO <sub>3</sub>                  | N.D.                       |
| 7                                                                                  | <b>Cs<sub>2</sub>CO<sub>3</sub></b> | <b>57</b>                  |
| 8                                                                                  | K <sub>2</sub> CO <sub>3</sub>      | 16                         |
| 9                                                                                  | K <sub>2</sub> HPO <sub>4</sub>     | 41                         |
| 10                                                                                 | KF                                  | N.D.                       |
| 11                                                                                 | /                                   | N.D.                       |

<sup>a</sup>Reaction conditions: **1a** (27.8 mg, 0.1 mmol, 1.0 eq.), **2a** (20.5 mg, 0.11 mmol, 1.1 eq.), base (0.1 mmol, 1.0 eq.), and DCM (0.05 M, 2.0 ml) were added to an oven-dried reaction tube (10 mL) at 25 °C for 1 h, then DDQ (45.4 mg, 0.2 mmol, 2.0 eq.) was added. After the addition was over, the resulting mixture was stirred at 25 °C for 11 h. <sup>b</sup>The yield was determined by HPLC using pure **3a** as the external standard ( $t_R$  = 4.898 min,  $\lambda_{max}$  = 242.9 nm; MeCN / H<sub>2</sub>O = 80:20 (v / v)). N.D. = Not detectable.

**Table S2** Screening of the Cs<sub>2</sub>CO<sub>3</sub> loading<sup>a</sup>

| <div><div>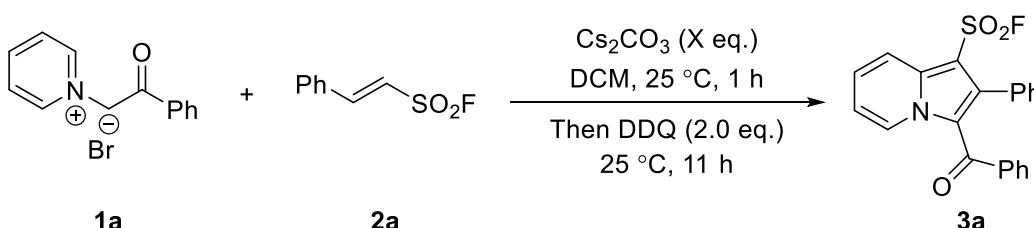</div><div><div><b>1a</b></div><div><b>2a</b></div><div><b>3a</b></div></div></div> |                                         |                                     |
|---------------------------------------------------------------------------------------------------------------------------------------------------------------------------------|-----------------------------------------|-------------------------------------|
| Entry                                                                                                                                                                           | Cs <sub>2</sub> CO <sub>3</sub> (X eq.) | Yield ( <b>3a</b> , %) <sup>b</sup> |
| 1                                                                                                                                                                               | 0.8                                     | 52                                  |
| 2                                                                                                                                                                               | 1.0                                     | 55                                  |
| 3                                                                                                                                                                               | 1.2                                     | 60                                  |
| <b>4</b>                                                                                                                                                                        | <b>1.5</b>                              | <b>65</b>                           |
| 5                                                                                                                                                                               | 2.0                                     | 64                                  |

<sup>a</sup>Reaction conditions: **1a** (27.8 mg, 0.1 mmol, 1.0 eq.), **2a** (20.5 mg, 0.11 mmol, 1.1 eq.), Cs<sub>2</sub>CO<sub>3</sub> (X eq.), and DCM (0.05 M, 2.0 ml) were added to an oven-dried reaction tube (10 mL) at 25 °C for 1 h, then DDQ (45.4 mg, 0.2 mmol, 2.0 eq.) was added. After the addition was over, the resulting mixture was stirred at 25 °C for 11 h. <sup>b</sup>The yield was determined by HPLC using pure **3a** as the external standard (*t*<sub>R</sub> = 4.898 min, λ<sub>max</sub> = 242.9 nm; MeCN / H<sub>2</sub>O = 80: 20 (v / v)).

**Table S3** Screening of the solvent<sup>a</sup>

| <div><div>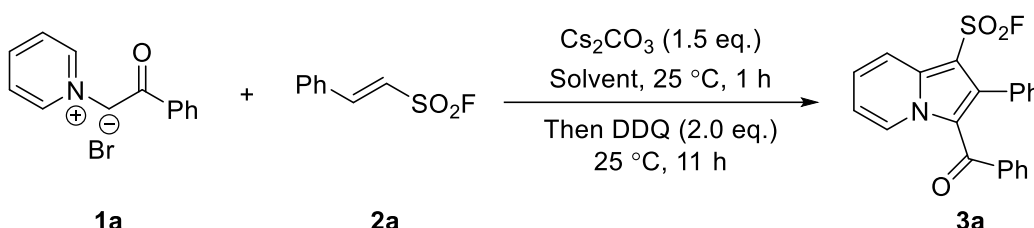</div><div><div><b>1a</b></div><div><b>2a</b></div><div><b>3a</b></div></div></div> |                    |                                     |
|---------------------------------------------------------------------------------------------------------------------------------------------------------------------------------|--------------------|-------------------------------------|
| Entry                                                                                                                                                                           | Solvent            | Yield ( <b>3a</b> , %) <sup>b</sup> |
| 1                                                                                                                                                                               | CH <sub>3</sub> Cl | 2                                   |
| 2                                                                                                                                                                               | DCE                | 55                                  |
| <b>3</b>                                                                                                                                                                        | <b>DCM</b>         | <b>65</b>                           |
| 4                                                                                                                                                                               | Toluene            | 38                                  |
| 5                                                                                                                                                                               | MeCN               | 5                                   |
| 6                                                                                                                                                                               | THF                | N.D.                                |
| 7                                                                                                                                                                               | DMSO               | 2                                   |

<sup>a</sup>Reaction conditions: **1a** (27.8 mg, 0.1 mmol, 1.0 eq.), **2a** (20.5 mg, 0.11 mmol, 1.1 eq.), Cs<sub>2</sub>CO<sub>3</sub> (48.9 mg, 0.15 mmol, 1.5 eq.), and solvent (0.05 M, 2.0 ml) were added to an oven-dried reaction tube (10 mL) at 25 °C for 1 h, then DDQ (45.4 mg, 0.2 mmol, 2.0 eq.) was added. After the addition was over, the resulting mixture was stirred at 25 °C for 11 h. <sup>b</sup>The yield was determined by HPLC using pure **3a** as the external standard (*t<sub>R</sub>* = 4.898 min, λ<sub>max</sub> = 242.9 nm; MeCN / H<sub>2</sub>O = 80: 20 (v / v)). N.D. = Not detectable.

**Table S4** Screening of the oxidant<sup>a</sup>

| Entry | Oxidant (2.0 eq.)    | Yield (3a, %) <sup>b</sup> |
|-------|----------------------|----------------------------|
| 1     | TEMPO                | N.D.                       |
| 2     | <b>DDQ</b>           | <b>65</b>                  |
| 3     | CuO                  | N.D.                       |
| 4     | MnO <sub>2</sub>     | N.D.                       |
| 5     | Cu(AcO) <sub>2</sub> | N.D.                       |
| 6     | I <sub>2</sub>       | 18                         |
| 7     | /                    | N.D.                       |

<sup>a</sup>Reaction conditions: **1a** (27.8 mg, 0.1 mmol, 1.0 eq.), **2a** (20.5 mg, 0.11 mmol, 1.1 eq.), Cs<sub>2</sub>CO<sub>3</sub> (48.9 mg, 0.15 mmol, 1.5 eq.), and DCM (0.05 M, 2.0 ml) were added to an oven-dried reaction tube (10 mL) at 25 °C for 1 h, then oxidant (0.2 mmol, 2.0 eq.) was added. After the addition was over, the resulting mixture was stirred at 25 °C for 11 h. <sup>b</sup>The yield was determined by HPLC using pure **3a** as the external standard (*t*<sub>R</sub> = 4.898 min, λ<sub>max</sub> = 242.9 nm; MeCN / H<sub>2</sub>O = 80: 20 (v / v)). N.D. = Not detectable.

**Table S5** Screening of the DDQ loading<sup>a</sup>

| <div><div>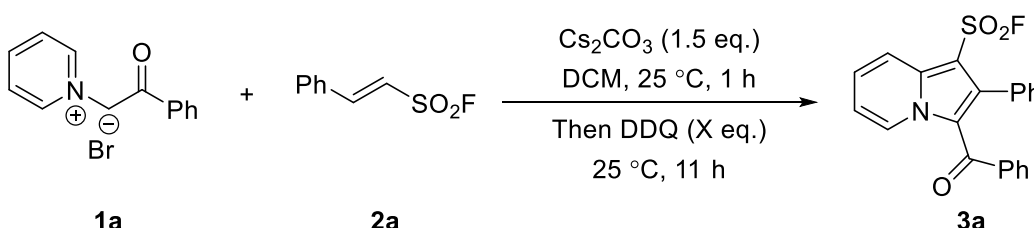</div><div><div><b>1a</b></div><div><b>2a</b></div><div><b>3a</b></div></div></div> |             |                                     |
|---------------------------------------------------------------------------------------------------------------------------------------------------------------------------------|-------------|-------------------------------------|
| Entry                                                                                                                                                                           | DDQ (X eq.) | Yield ( <b>3a</b> , %) <sup>b</sup> |
| 1                                                                                                                                                                               | 1.5         | 50                                  |
| 2                                                                                                                                                                               | 2.0         | 63                                  |
| 3                                                                                                                                                                               | 2.5         | 65                                  |
| 4                                                                                                                                                                               | 3.0         | 67                                  |
| <b>5</b>                                                                                                                                                                        | <b>3.5</b>  | <b>68</b>                           |
| 6                                                                                                                                                                               | 4.0         | 67                                  |

<sup>a</sup>Reaction conditions: **1a** (27.8 mg, 0.1 mmol, 1.0 eq.), **2a** (20.5 mg, 0.11 mmol, 1.1 eq.), Cs<sub>2</sub>CO<sub>3</sub> (48.9 mg, 0.15 mmol, 1.5 eq.), and DCM (0.05 M, 2.0 ml) were added to an oven-dried reaction tube (10 mL) at 25 °C for 1 h, then DDQ (X eq.) was added. After the addition was over, the resulting mixture was stirred at 25 °C for 11 h. <sup>b</sup>The yield was determined by HPLC using pure **3a** as the external standard (*t*<sub>R</sub> = 4.898 min, λ<sub>max</sub> = 242.9 nm; MeCN / H<sub>2</sub>O = 80:20 (v / v)).

**Table S6** Screening of the temperature<sup>a</sup>

| <div><div>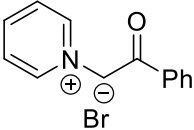<br/><b>1a</b></div><div>+</div><div><br/><b>2a</b></div><div><math>\xrightarrow[\text{Then DDQ (3.5 eq.)}]{\text{Cs}_2\text{CO}_3 (1.5 \text{ eq.})}</math><br/>DCM, T °C, 1 h<br/>T °C, 11 h</div><div><br/><b>3a</b></div></div> |                  |                            |
|----------------------------------------------------------------------------------------------------------------------------------------------------------------------------------------------------------------------------------------------------------------------------------------------------------------------------------------------------------------------------------------------------------------------------------------------------------------------------------------------------|------------------|----------------------------|
| Entry                                                                                                                                                                                                                                                                                                                                                                                                                                                                                              | Temperature (°C) | Yield (3a, %) <sup>b</sup> |
| 1                                                                                                                                                                                                                                                                                                                                                                                                                                                                                                  | 0                | 2                          |
| 2                                                                                                                                                                                                                                                                                                                                                                                                                                                                                                  | 15               | 53                         |
| 3                                                                                                                                                                                                                                                                                                                                                                                                                                                                                                  | 25               | 68                         |
| <b>4</b>                                                                                                                                                                                                                                                                                                                                                                                                                                                                                           | <b>35</b>        | <b>75</b>                  |
| 5                                                                                                                                                                                                                                                                                                                                                                                                                                                                                                  | 45               | 71                         |

<sup>a</sup>Reaction conditions: **1a** (27.8 mg, 0.1 mmol, 1.0 eq.), **2a** (20.5 mg, 0.11 mmol, 1.1 eq.), Cs<sub>2</sub>CO<sub>3</sub> (48.9 mg, 0.15 mmol, 1.5 eq.), and DCM (0.05 M, 2.0 ml) were added to an oven-dried reaction tube (10 mL) at T °C for 1 h, then DDQ (79.5 mg, 0.35 mmol, 3.5 eq.) was added. After the addition was over, the resulting mixture was stirred at T °C for 11 h. <sup>b</sup>The yield was determined by HPLC using pure **3a** as the external standard (*t<sub>R</sub>* = 4.898 min, λ<sub>max</sub> = 242.9 nm; MeCN / H<sub>2</sub>O = 80: 20 (v / v)).

**Table S7** Screening of the time<sup>a</sup>

| <div><div>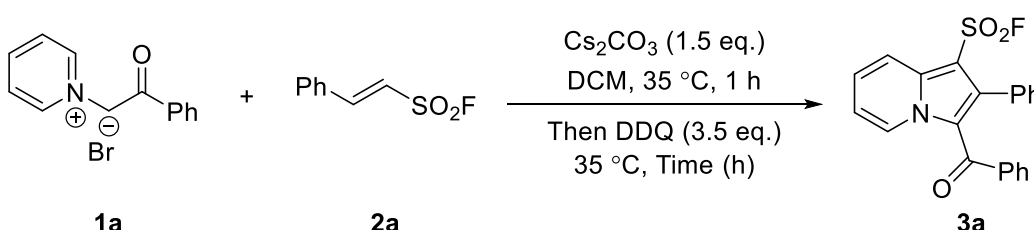</div><div><div><b>1a</b></div><div><b>2a</b></div><div><b>3a</b></div></div></div> |          |                                     |
|---------------------------------------------------------------------------------------------------------------------------------------------------------------------------------|----------|-------------------------------------|
| Entry                                                                                                                                                                           | Time (h) | Yield ( <b>3a</b> , %) <sup>b</sup> |
| 1                                                                                                                                                                               | 1.0      | 77                                  |
| 2                                                                                                                                                                               | 3.0      | 80                                  |
| 3                                                                                                                                                                               | 5.0      | 81                                  |
| 4                                                                                                                                                                               | 7.0      | 77                                  |
| 5                                                                                                                                                                               | 11.0     | 75                                  |
| 6                                                                                                                                                                               | 15.0     | 74                                  |

<sup>a</sup>Reaction conditions: **1a** (27.8 mg, 0.1 mmol, 1.0 eq.), **2a** (20.5 mg, 0.11 mmol, 1.1 eq.), Cs<sub>2</sub>CO<sub>3</sub> (48.9 mg, 0.15 mmol, 1.5 eq.), and DCM (0.05 M, 2.0 ml) were added to an oven-dried reaction tube (10 mL) at 35 °C for 1 h, then DDQ (79.5 mg, 0.35 mmol, 3.5 eq.) was added. After the addition was over, the resulting mixture was stirred at 35 °C for the corresponding time. <sup>b</sup>The yield was determined by HPLC using pure **3a** as the external standard (*t<sub>R</sub>* = 4.898 min, λ<sub>max</sub> = 242.9 nm; MeCN / H<sub>2</sub>O = 80: 20 (v / v)).

**Table S8** Screening of the (E)-2-phenylethene-1-sulfonyl fluoride (**2a**) loading<sup>a</sup>

| <div><div>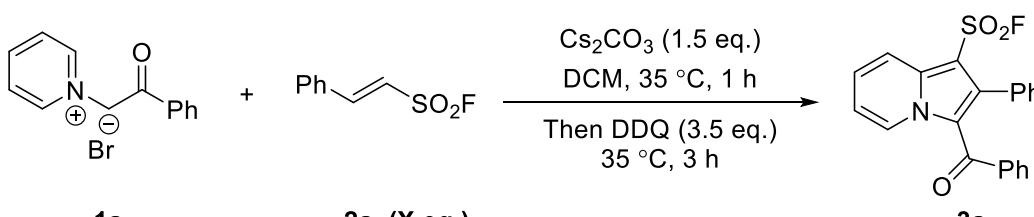</div><div><div><b>1a</b></div><div><b>2a, (X eq.)</b></div><div><b>3a</b></div></div></div> |                   |                                   |
|------------------------------------------------------------------------------------------------------------------------------------------------------------------------------------------|-------------------|-----------------------------------|
| Entry                                                                                                                                                                                    | <b>2a (X eq.)</b> | <b>Yield (3a, %) <sup>b</sup></b> |
| 1                                                                                                                                                                                        | 1.1               | 80                                |
| 2                                                                                                                                                                                        | <b>1.3</b>        | <b>85</b>                         |
| 3                                                                                                                                                                                        | 1.5               | 84                                |
| 4                                                                                                                                                                                        | 1.7               | 85                                |

<sup>a</sup>Reaction conditions: **1a** (27.8 mg, 0.1 mmol, 1.0 eq.), **2a** (X eq.), Cs<sub>2</sub>CO<sub>3</sub> (48.9 mg, 0.15 mmol, 1.5 eq.), and DCM (0.05 M, 2.0 ml) were added to an oven-dried reaction tube (10 mL) at 35 °C for 1 h, then DDQ (79.5 mg, 0.35 mmol, 3.5 eq.) was added. After the addition was over, the resulting mixture was stirred at 35 °C for 3 h. <sup>b</sup>The yield was determined by HPLC using pure **3a** as the external standard (*t<sub>R</sub>* = 4.898 min, λ<sub>max</sub> = 242.9 nm; MeCN / H<sub>2</sub>O = 80: 20 (v / v)).

### 3. Experimental Procedures

#### 3.1 Preparation of activated pyridines (1)

**1a<sup>1</sup>, 1b-1e<sup>2</sup>, 1f<sup>1</sup>, 1g-1i<sup>3</sup>, 1j<sup>1</sup>, 1k<sup>2</sup>, 1l-1p<sup>4</sup>, 1q-1s<sup>5</sup>, 1t<sup>4</sup> and 4a-4d<sup>6</sup>** are known compounds and were synthesized according to the literature.

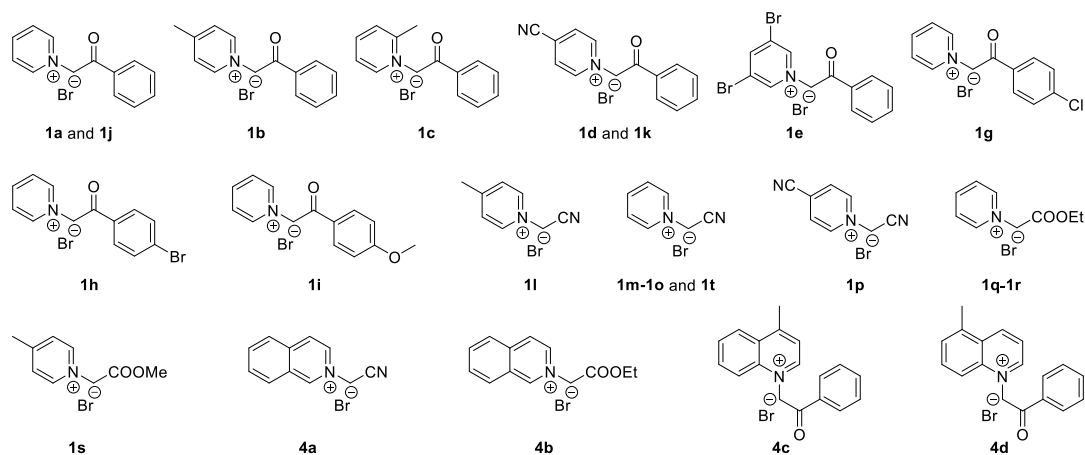

#### 3.2 General procedures for synthesis of activated pyridines 1f and 1u (with 1f as an example)

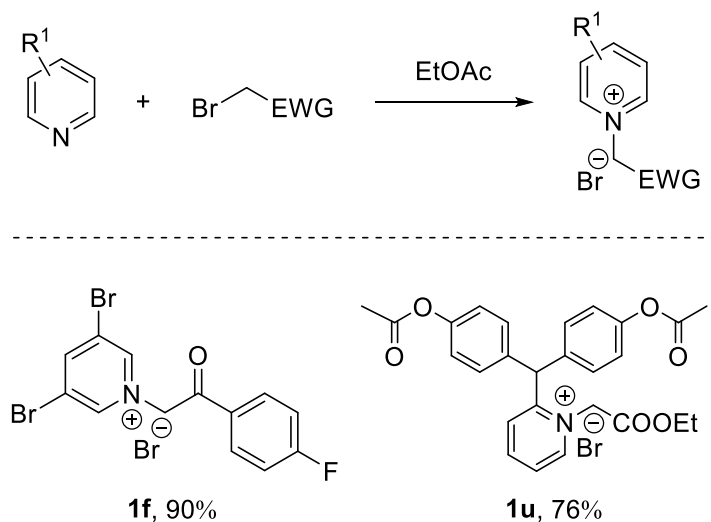

3,5-Dibromopyridine (5 mmol) was added to a solution of the 2-bromo-1-(4-fluorophenyl) ethan-1-one (1.5 equiv.) in EtOAc (0.4 M) in a 50 mL round-bottom flask equipped with a magnetic stirring bar. The mixture was refluxed for 12 h, then cooled to room temperature upon completion. Filter the resulting precipitation and wash the residue with diethyl ether. Finally, the residue was dried in vacuum to obtain the product **1f**.

### 3.3 Preparation of $\beta$ -arylethenesulfonyl fluorides (**2**)<sup>7</sup>

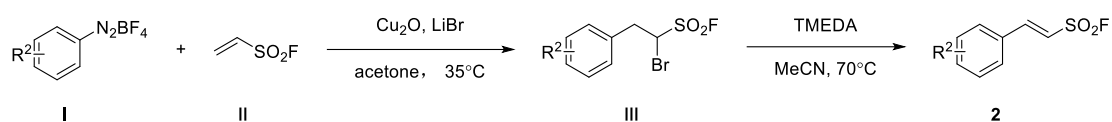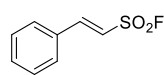

**2a-2i, 2l and 2s-2t**  
66%, 2 steps

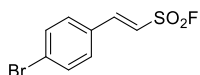

**2m**  
78%, 2 steps

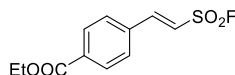

**2j-2k, 2o and 2q**  
63%, 2 steps

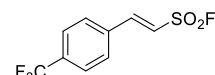

**2n, 2p and 2r**  
64%, 2 steps

**Step 1:** An oven-dried round-bottom flask (100 mL) equipped with a magnetic stirring bar was charged with aryldiazonium tetrafluoroborates ( **I** , 15 mmol, 1.0 eq.), Cu<sub>2</sub>O (107 mg, 5 mol%) and ethenesulfonyl fluoride ( **II** , 9900 mg, 90 mmol, 6.0 eq.), and acetone (60 mL). Then a solution of LiBr (1303 mg, 15 mmol, 1.0 eq.) in acetone (15 mL) was added dropwise to the above solution. The mixture was stirred at 35 °C for 5 hours under an air atmosphere. Once the reaction reached its completion, the mixture was diluted with water, extracted with ethyl acetate (3×60 mL) and the combined organic layers dried over anhydrous sodium sulfate. The solvent was concentrated under reduced pressure and the residue was further purified by column chromatography on silica gel via gradient elution with petroleum ether/ethyl acetate (40:1 to 1:1, v/v) as eluent to afford pure  $\alpha$ -bromo arylethyl sulfonyl fluorides (**III**).

**Step 2:** An oven-dried round-bottom tube (100 mL) equipped with a magnetic stirring bar was charged with  $\alpha$ -bromo arylethyl sulfonyl fluorides (**III**, 10 mmol, 1.0 eq.) and MeCN (50 mL). Then TMEDA (1394 mg, 12 mmol, 1.2 eq.) was added dropwise to the above solution. The mixture was stirred at 70 °C for 12 hours under an air atmosphere. Once the reaction reached its completion, the mixture was concentrated under reduced pressure and the residue was further purified by column chromatography on silica gel via gradient elution with petroleum ether/ethyl acetate (10:1 to 1:1, v/v) as eluent to afford pure  $\beta$ -arylethenesulfonyl fluorides (**2**).

### 3.4 General procedure for synthesis of compounds 3, 5 and 10 (with 3a as an example)

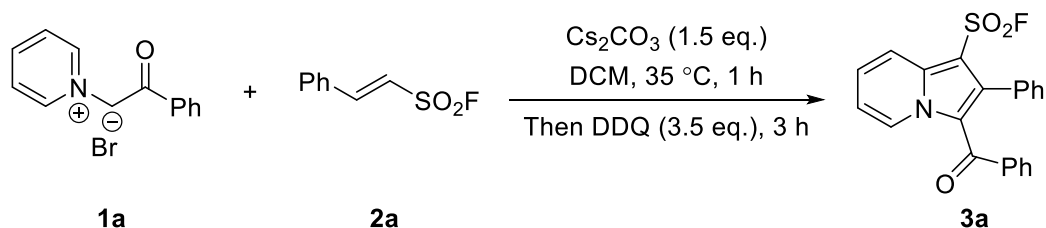

1-(2-oxo-2-phenylethyl)pyridin-1-ium bromide (**1a**, 139 mg, 0.5 mmol), (E)-2-phenylethene-1-sulfonyl fluoride (**2a**, 121 mg, 0.65 mmol),  $\text{Cs}_2\text{CO}_3$  (244 mg, 0.75 mmol), and DCM (0.05 M, 10.0 mL) were added to an oven-dried round-bottom flask (50 mL) equipped with a magnetic stirring bar at 35 °C for 1 h, then DDQ (397 mg, 1.75 mmol) was added and the mixture was stirred at 35 °C for 3 h. After the reaction was completed, the mixture was filtered, and the filter cake was washed with ethyl acetate. The filtrate was extracted with ethyl acetate (3 × 20 mL) and the combined organic layers were further washed with brine, dried over anhydrous sodium sulfate. The solvent was concentrated under reduced pressure and the residue was further purified by column chromatography on silica gel with petroleum ether/ethyl acetate (10:1 to 3:1, v/v) as eluents to obtain the desired product **3a** as light yellow solid (153 mg, 81% yield).

### 3.5 General procedure for synthesis of compound 6

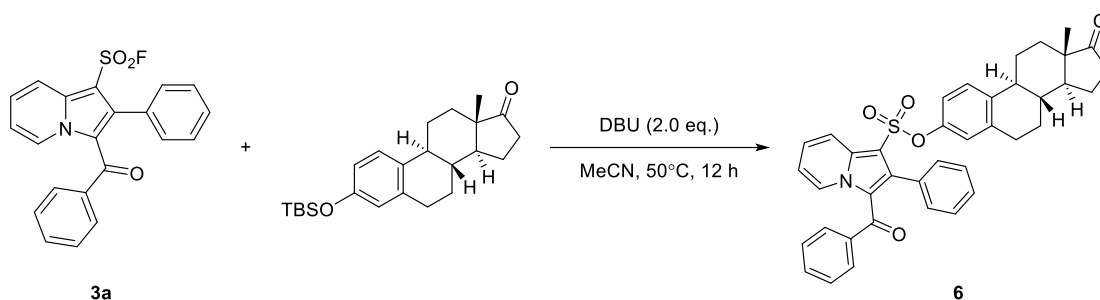

To a solution of compound **3a** (152 mg, 0.4 mmol) and TBS-protected estrone (154 mg, 0.4 mmol) dissolved in acetonitrile (4 mL) was added DBU (122 mg, 0.8 mmol), and the resulting mixture was stirred at 50 °C for 12 h. The reaction mixture was diluted with water, and the aqueous phase was extracted with ethyl acetate (3 × 20 mL). The combined organic layers were washed with brine and dried over anhydrous  $\text{Na}_2\text{SO}_4$ .

before being concentrated to dryness under vacuum. The residue was purified through silica gel chromatography with petroleum ether/ethyl acetate (3:1, v/v) as eluents to obtain the desired product **6** as white solid (249 mg, 99% yield).

### 3.6 General procedure for synthesis of compound 7

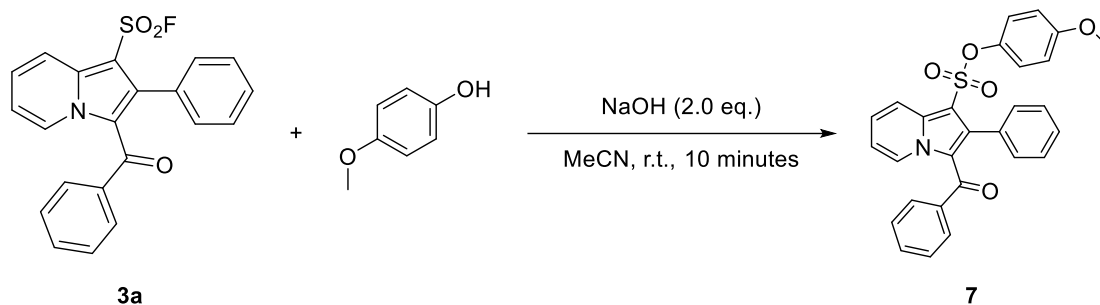

3-benzoyl-2-phenylindolizine-1-sulfonyl fluoride (**3a**, 189.7 mg, 0.5 mmol), 4-methoxyphenol (74.5 mg, 0.6 mmol), NaOH (40 mg, 1.0 mmol) were added in a solution of acetonitrile (3 mL) and reacted at room temperature for 10 minutes. The reaction mixture was extracted with ethyl acetate (3×20 mL) and the combined organic layers were dried over anhydrous Na<sub>2</sub>SO<sub>4</sub>, filtered and concentrated under reduced pressure. The residue was purified through silica gel chromatography with petroleum ether/ethyl acetate (3:1, v/v) as eluents to obtain the desired product **7** as light yellow solid (239 mg, 99% yield).

### 3.7 General procedure for synthesis of compound 8

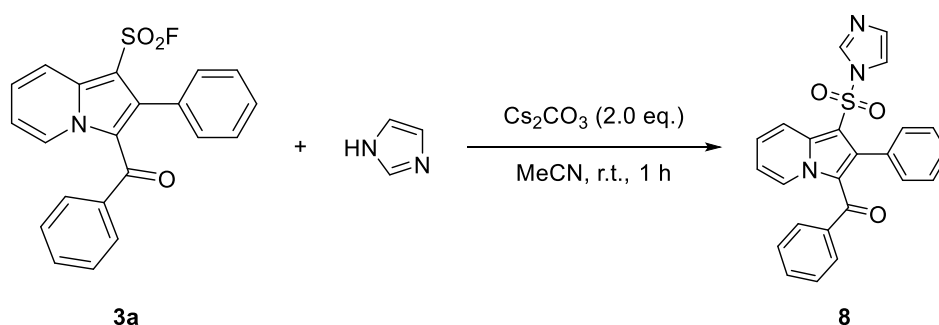

3-benzoyl-2-phenylindolizine-1-sulfonyl fluoride (**3a**, 189.7 mg, 0.5 mmol), imidazole (68 mg, 1.0 mmol) and Cs<sub>2</sub>CO<sub>3</sub> (326 mg, 1.0 mmol) were added in mixed solution (3 mL) of acetonitrile, and reacted at room temperature for 1 h. The reaction mixture was extracted with ethyl acetate (3×20 mL) and the combined organic layers

were dried over anhydrous sodium sulfate, filtered and concentrated under reduced pressure. The residue was purified through silica gel chromatography with petroleum ether/ethyl acetate (1:1, v/v) as eluents to obtain the desired product **8** as white solid (212 mg, 99% yield).

#### 4. Unsuccessful experiments of activated pyridines and ESF

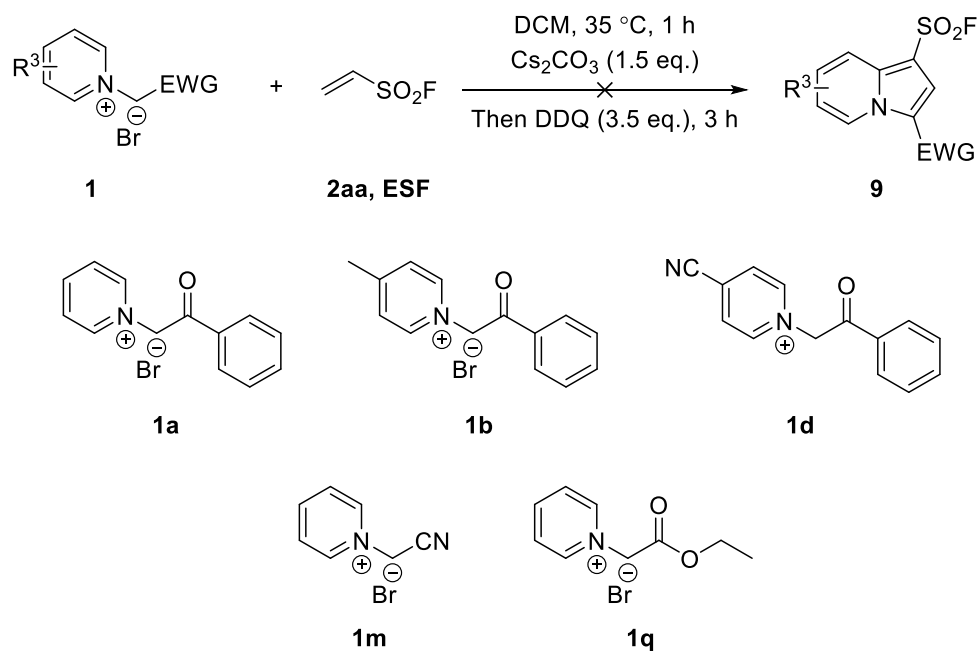

In our experimental work, attempts to synthesize indolizine sulfonylethers via the reactions of activated pyridines (**1a**, **1b**, **1d**, **1m**, **1q**) with ESF did not achieve success. These reactions are quite complex, and further analysis results show that these target products have not been obtained. It is plausible that the high reactivity properties of ESF<sup>8</sup> led to the occurrence of other side reactions.

#### 5. Characterization

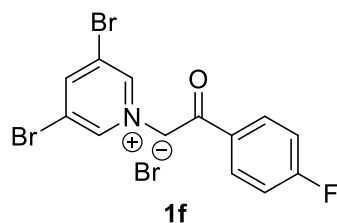

*3,5-dibromo-1-(2-(4-fluorophenyl)-2-oxoethyl)pyridin-1-ium bromide (1a)*. White solid, 949 mg, 90% yield. M.p. 239–240 °C. General procedure for synthesis of salt **1f**

was followed. **<sup>1</sup>H NMR** (500 MHz, DMSO-*d*<sub>6</sub>)  $\delta$  9.55 (s, 2H), 9.46 (s, 1H), 8.16 (dd, *J* = 8.5, 5.5 Hz, 2H), 7.52 (t, *J* = 8.5 Hz, 2H), 6.51 (d, *J* = 3.5 Hz, 1H). **<sup>13</sup>C NMR** (126 MHz, DMSO-*d*<sub>6</sub>)  $\delta$  193.7, 171.1 (d, *J* = 254.3 Hz), 156.0 (d, *J* = 52.2 Hz), 151.7 (d, *J* = 61.3 Hz), 136.8 (dd, *J* = 20.1, 10.0 Hz), 135.4 (d, *J* = 2.9 Hz), 127.1, 121.7 (dd, *J* = 22.5, 6.1 Hz), 71.3. **HRMS-ESI** (*m/z*) calcd. for [C<sub>13</sub>H<sub>9</sub>Br<sub>2</sub>FNO]<sup>+</sup> ([M-Br]<sup>+</sup>): 371.9029, found: 371.9021.

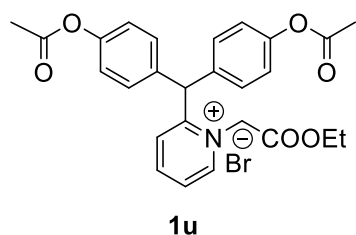

*2-(bis(4-acetoxyphenyl)methyl)-1-(2-ethoxy-2-oxoethyl)pyridin-1-ium bromide (1u)*. Yellow solid, 2.06g, 78% yield. M.p. 194–195 °C. General procedure for synthesis of salt **1u** was followed. **<sup>1</sup>H NMR** (500 MHz, DMSO-*d*<sub>6</sub>)  $\delta$  9.09 (d, *J* = 6.0 Hz, 1H), 8.66 (t, *J* = 8.0 Hz, 1H), 8.19 (t, *J* = 7.0 Hz, 1H), 7.60 (d, *J* = 8.0 Hz, 1H), 7.19 (t, *J* = 6.5 Hz, 8H), 6.62 (s, 1H), 5.85 (s, 2H), 3.84 (q, *J* = 7.0 Hz, 2H), 2.26 (s, 6H), 1.07 (t, *J* = 7.0 Hz, 3H). **<sup>13</sup>C NMR** (126 MHz, DMSO-*d*<sub>6</sub>)  $\delta$  169.0, 165.2, 158.4, 150.1, 148.7, 147.3, 134.9, 130.5, 129.4, 126.2, 122.5, 62.3, 57.3, 50.0, 20.8, 13.6. **HRMS-ESI** (*m/z*) calcd. for [C<sub>26</sub>H<sub>26</sub>NO<sub>6</sub>]<sup>+</sup> ([M-Br]<sup>+</sup>): 448.1755, found: 448.1758.

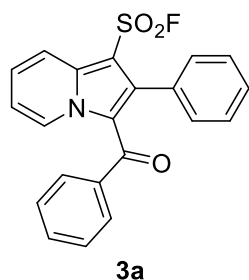

*3-benzoyl-2-phenylindolizine-1-sulfonyl fluoride (3a)*. light yellow solid, 153 mg, 81% yield. M.p. 160–161 °C. Purification by column chromatography on silica gel using petroleum ether / ethyl acetate (10:1, v/v) as eluent. **<sup>1</sup>H NMR** (500 MHz, CDCl<sub>3</sub>)  $\delta$  9.50 (d, *J* = 7.0 Hz, 1H), 8.33 (d, *J* = 9.0 Hz, 1H), 7.57 (dd, *J* = 9.0, 7.0 Hz, 1H), 7.41 (d, *J* = 7.5 Hz, 2H), 7.22 – 7.16 (m, 4H), 7.09 – 7.03 (m, 5H). **<sup>19</sup>F NMR** (471 MHz, CDCl<sub>3</sub>)

$\delta$  76.67 (s, 1F).  $^{13}\text{C}$  NMR (126 MHz,  $\text{CDCl}_3$ )  $\delta$  188.4, 139.0, 138.6, 138.3, 132.4, 131.4, 130.9, 129.6, 129.3, 128.9, 128.7, 128.1, 127.9, 123.4, 118.6, 116.3, 103.3 (d,  $J = 30.2$  Hz). **HRMS-ESI** ( $m/z$ ) calcd. for  $[\text{C}_{21}\text{H}_{15}\text{FNO}_3\text{S}]^+$  ( $[\text{M}+\text{H}]^+$ ): 380.0751, found: 380.0750.

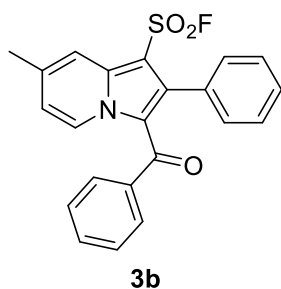

*3-benzoyl-7-methyl-2-phenylindolizine-1-sulfonyl fluoride (3b)*. White solid, 122 mg, 62% yield. M.p. 192–193 °C. Purification by column chromatography on silica gel using petroleum ether / ethyl acetate (10:1, v/v) as eluent.  $^1\text{H}$  NMR (500 MHz,  $\text{CDCl}_3$ )  $\delta$  9.42 (d,  $J = 7.0$  Hz, 1H), 8.09 (s, 1H), 7.41 – 7.37 (m, 2H), 7.21 – 7.15 (m, 3H), 7.08 – 7.00 (m, 6H), 2.55 (s, 3H).  $^{19}\text{F}$  NMR (471 MHz,  $\text{CDCl}_3$ )  $\delta$  76.74 (s, 1F).  $^{13}\text{C}$  NMR (126 MHz,  $\text{CDCl}_3$ )  $\delta$  188.1, 141.2, 139.1, 138.5, 131.9, 131.1, 130.8, 129.3, 128.6, 128.0, 127.8, 127.6, 122.7, 118.5, 116.9, 101.7 (d,  $J = 29.8$  Hz), 21.9. **HRMS-ESI** ( $m/z$ ) calcd. for  $[\text{C}_{22}\text{H}_{17}\text{FNO}_3\text{S}]^+$  ( $[\text{M}+\text{H}]^+$ ): 394.0908, found: 394.0907.

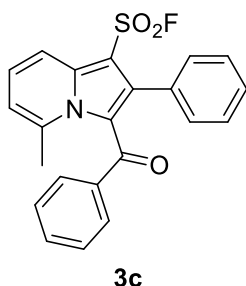

*3-benzoyl-5-methyl-2-phenylindolizine-1-sulfonyl fluoride (3c)*. Light yellow solid, 93 mg, 47% yield. M.p. 158–159 °C. Purification by column chromatography on silica gel using petroleum ether / ethyl acetate (10:1, v/v) as eluent.  $^1\text{H}$  NMR (500 MHz,  $\text{CDCl}_3$ )  $\delta$  8.27 (d,  $J = 9.0$  Hz, 1H), 7.71 – 7.65 (m, 2H), 7.47 (dd,  $J = 9.0, 7.0$  Hz, 1H), 7.39 – 7.35 (m, 1H), 7.24 – 7.19 (m, 4H), 7.13 – 7.09 (m, 3H), 6.94 (d,  $J = 7.0$  Hz, 1H), 2.43 (s, 3H).  $^{19}\text{F}$  NMR (471 MHz,  $\text{CDCl}_3$ )  $\delta$  76.34 (s, 1F).  $^{13}\text{C}$  NMR (126 MHz,  $\text{CDCl}_3$ )  $\delta$

188.3, 138.8 (d,  $J = 1.7$  Hz), 138.1, 138.0, 135.2, 133.5, 130.5, 130.4, 130.3, 127.8, 127.7, 124.8, 117.2, 116.1, 101.9 (d,  $J = 28.9$  Hz), 23.2. **HRMS-ESI** ( $m/z$ ) calcd. for  $[C_{22}H_{17}FNO_3S]^+$  ( $[M+H]^+$ ): 394.0908, found: 394.0918.

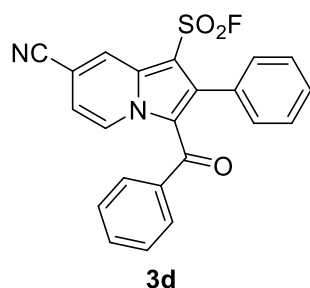

*3-benzoyl-7-cyano-2-phenylindolizine-1-sulfonyl fluoride (3d)*. Yellow solid, 182 mg, 90% yield. M.p. 177–178 °C. Purification by column chromatography on silica gel using petroleum ether / ethyl acetate (7:1, v/v) as eluent.  **$^1H$  NMR** (500 MHz,  $CDCl_3$ )  $\delta$  9.49 (d,  $J = 7.5$  Hz, 1H), 8.78 (s, 1H), 7.51 (d,  $J = 7.5$  Hz, 2H), 7.33 (dd,  $J = 15.0, 7.0$  Hz, 2H), 7.27 (d,  $J = 6.5$  Hz, 2H), 7.22 – 7.15 (m, 5H).  **$^{19}F$  NMR** (471 MHz,  $CDCl_3$ )  $\delta$  76.79 (s, 1F).  **$^{13}C$  NMR** (126 MHz,  $CDCl_3$ )  $\delta$  187.9, 139.0, 137.3, 135.2, 139.0, 131.0, 129.5, 129.5, 129.2, 128.7, 128.1, 128.0, 124.6, 124.2, 116.6, 115.6, 111.5, 106.5 (d,  $J = 31.3$  Hz). **HRMS-ESI** ( $m/z$ ) calcd. for  $[C_{22}H_{14}FN_2O_3S]^+$  ( $[M+H]^+$ ): 405.0704, found: 405.0713.

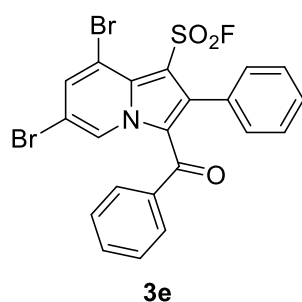

*3-benzoyl-6,8-dibromo-2-phenylindolizine-1-sulfonyl fluoride (3e)*. White solid, 233 mg, 87% yield. M.p. 180–181 °C. Purification by column chromatography on silica gel using petroleum ether / ethyl acetate (10:1, v/v) as eluent.  **$^1H$  NMR** (500 MHz,  $CDCl_3$ )  $\delta$  9.51 (s, 1H), 7.93 (s, 1H), 7.37 (d,  $J = 8.0$  Hz, 2H), 7.27 – 7.21 (m, 1H), 7.14 (d,  $J = 7.0$  Hz, 2H), 7.07 (t,  $J = 7.5$  Hz, 5H).  **$^{19}F$  NMR** (471 MHz,  $CDCl_3$ )  $\delta$  79.21 (s, 1F).  **$^{13}C$**

**NMR** (126 MHz, CDCl<sub>3</sub>)  $\delta$  188.2, 139.6, 137.6, 136.5, 133.2, 132.8, 131.2, 130.7, 129.5, 128.9, 128.0, 127.7, 127.1, 122.9, 111.7, 110.0, 106.7 (d,  $J$  = 33.1 Hz). **HRMS-ESI** (m/z) calcd. for [C<sub>21</sub>H<sub>13</sub>Br<sub>2</sub>FNO<sub>3</sub>S]<sup>+</sup> ([M+H]<sup>+</sup>): 537.8961, found: 537.8951.

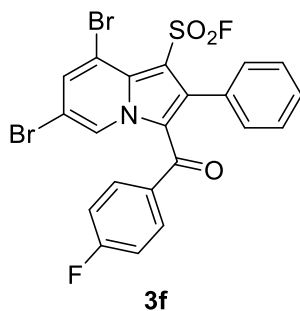

*6,8-dibromo-3-(4-fluorobenzoyl)-2-phenylindolizine-1-sulfonyl fluoride (3f)*. White solid, 258 mg, 93% yield. M.p. 223–224 °C. Purification by column chromatography on silica gel using petroleum ether / ethyl acetate (10:1, v/v) as eluent. **<sup>1</sup>H NMR** (500 MHz, CDCl<sub>3</sub>)  $\delta$  9.55 – 9.49 (m, 1H), 8.01 – 7.94 (m, 1H), 7.44 (dd,  $J$  = 8.5, 5.3 Hz, 2H), 7.15 (h,  $J$  = 7.5 Hz, 5H), 6.77 (t,  $J$  = 8.0 Hz, 2H). **<sup>19</sup>F NMR** (471 MHz, CDCl<sub>3</sub>)  $\delta$  79.18 (s, 1F), -104.53 (t,  $J$  = 6.6 Hz, 1F). **<sup>13</sup>C NMR** (126 MHz, CDCl<sub>3</sub>)  $\delta$  186.5, 165.2 (d,  $J$  = 255.6 Hz), 139.4, 136.5, 133.8 (d,  $J$  = 2.8 Hz), 133.2, 132.0 (d,  $J$  = 9.5 Hz), 131.1, 130.6, 128.9, 127.7, 127.0, 122.5, 115.1 (d,  $J$  = 22.1 Hz), 111.6, 109.9, 106.6 (d,  $J$  = 33.5 Hz). **HRMS-ESI** (m/z) calcd. for [C<sub>21</sub>H<sub>12</sub>Br<sub>2</sub>F<sub>2</sub>NO<sub>3</sub>S]<sup>+</sup> ([M+H]<sup>+</sup>): 553.8867, found: 553.8859.

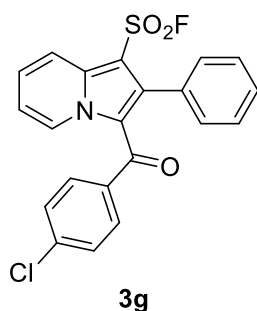

*3-(4-chlorobenzoyl)-2-phenylindolizine-1-sulfonyl fluoride (3g)*. White solid, 126 mg, 61% yield. M.p. 128–129 °C. Purification by column chromatography on silica gel using petroleum ether / ethyl acetate (10:1, v/v) as eluent. **<sup>1</sup>H NMR** (500 MHz, CDCl<sub>3</sub>)  $\delta$  9.51 (d,  $J$  = 7.0 Hz, 1H), 8.33 (d,  $J$  = 9.0 Hz, 1H), 7.58 (dd,  $J$  = 9.0, 6.9 Hz, 1H), 7.32

(d,  $J = 8.0$  Hz, 2H), 7.18 (dd,  $J = 13.0, 6.9$  Hz, 4H), 7.11 (t,  $J = 7.5$  Hz, 2H), 7.01 (d,  $J = 8.0$  Hz, 2H).  **$^{19}\text{F}$  NMR** (471 MHz,  $\text{CDCl}_3$ )  $\delta$  76.73 (s, 1F).  **$^{13}\text{C}$  NMR** (126 MHz,  $\text{CDCl}_3$ )  $\delta$  186.8, 139.0, 138.3, 138.1, 136.8, 131.2, 130.6, 130.5, 129.4, 128.8, 128.5, 128.1, 127.8, 122.8, 118.4, 116.2, 103.2 (d,  $J = 30.0$  Hz). **HRMS-ESI** ( $m/z$ ) calcd. for  $[\text{C}_{21}\text{H}_{14}\text{ClFNO}_3\text{S}]^+$  ( $[\text{M}+\text{H}]^+$ ): 414.0361, found: 414.0355.

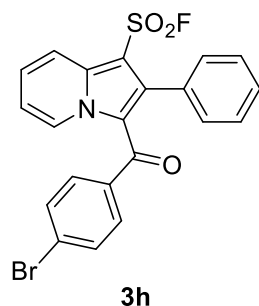

*3-(4-bromobenzoyl)-2-phenylindolizine-1-sulfonyl fluoride (3h)*. Yellow solid, 172 mg, 75% yield. M.p. 119–120 °C. Purification by column chromatography on silica gel using petroleum ether / ethyl acetate (10:1, v/v) as eluent.  **$^1\text{H}$  NMR** (500 MHz,  $\text{CDCl}_3$ )  $\delta$  9.56 (d,  $J = 7.0$  Hz, 1H), 8.36 (d,  $J = 9.0$  Hz, 1H), 7.62 (dd,  $J = 9.0, 7.0$  Hz, 1H), 7.28 (s, 2H), 7.21 (ddd,  $J = 13.5, 8.5, 6.0$  Hz, 6H), 7.16–7.12 (m, 2H).  **$^{19}\text{F}$  NMR** (471 MHz,  $\text{CDCl}_3$ )  $\delta$  76.72 (s, 1F).  **$^{13}\text{C}$  NMR** (126 MHz,  $\text{CDCl}_3$ )  $\delta$  187.0, 139.1, 138.2, 137.2, 131.2, 131.1, 130.7, 130.4, 129.4, 128.8, 128.5, 127.8, 126.9, 122.8, 118.4, 116.2, 103.3 (d,  $J = 30.2$  Hz). **HRMS-ESI** ( $m/z$ ) calcd. for  $[\text{C}_{21}\text{H}_{14}\text{BrFNO}_3\text{S}]^+$  ( $[\text{M}+\text{H}]^+$ ): 457.9856, found: 457.9846.

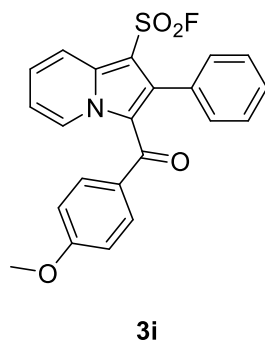

*3-(4-methoxybenzoyl)-2-phenylindolizine-1-sulfonyl fluoride (3i)*. Light yellow solid, 160 mg, 78% yield. M.p. 108–109 °C. Purification by column chromatography on silica

gel using petroleum ether / ethyl acetate (5:1, v/v) as eluent. **<sup>1</sup>H NMR** (500 MHz, CDCl<sub>3</sub>)  $\delta$  9.27 (d,  $J$  = 7.0 Hz, 1H), 8.30 (d,  $J$  = 9.0 Hz, 1H), 7.52 (t,  $J$  = 8.0 Hz, 1H), 7.48 – 7.43 (m, 2H), 7.25 – 7.20 (m, 2H), 7.15 – 7.09 (m, 4H), 6.59 – 6.54 (m, 2H), 3.73 (s, 3H). **<sup>19</sup>F NMR** (471 MHz, CDCl<sub>3</sub>)  $\delta$  76.83 (s, 1F). **<sup>13</sup>C NMR** (126 MHz, CDCl<sub>3</sub>)  $\delta$  186.6, 163.1, 137.9, 137.3, 132.0, 131.2, 130.8, 130.7, 128.6, 128.5, 128.2, 127.7, 123.3, 118.3, 115.7, 113.3, 102.3 (d,  $J$  = 29.5 Hz), 55.5 (d,  $J$  = 3.6 Hz). **HRMS-ESI** (m/z) calcd. for [C<sub>22</sub>H<sub>17</sub>FNO<sub>4</sub>S]<sup>+</sup> ([M+H]<sup>+</sup>): 410.0857, found: 410.0858.

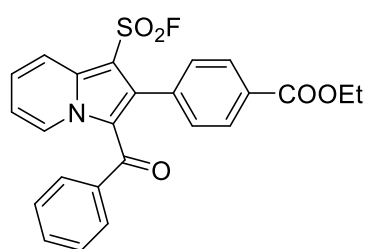

**3j**

*Ethyl 4-(3-benzoyl-1-(fluorosulfonyl)indolizin-2-yl)benzoate (3j)*. Light yellow solid, 115 mg, 51% yield. M.p. 148–149 °C. Purification by column chromatography on silica gel using petroleum ether / ethyl acetate (10:1, v/v) as eluent. **<sup>1</sup>H NMR** (500 MHz, CDCl<sub>3</sub>)  $\delta$  9.57 (d,  $J$  = 7.0 Hz, 1H), 8.40 (d,  $J$  = 9.0 Hz, 1H), 7.83 (d,  $J$  = 8.0 Hz, 2H), 7.67 (t,  $J$  = 8.0 Hz, 1H), 7.48 (d,  $J$  = 7.5 Hz, 2H), 7.31 (dd,  $J$  = 26.0, 7.5 Hz, 4H), 7.14 (t,  $J$  = 7.5 Hz, 2H), 4.40 (q,  $J$  = 7.0 Hz, 2H), 1.44 (t,  $J$  = 7.0 Hz, 3H). **<sup>19</sup>F NMR** (471 MHz, CDCl<sub>3</sub>)  $\delta$  76.93 (s, 1F). **<sup>13</sup>C NMR** (126 MHz, CDCl<sub>3</sub>)  $\delta$  187.9, 166.1, 138.2, 138.0, 137.4, 135.33, 132.4, 131.2, 130.4, 129.3, 129.3, 128.8, 128.5, 128.0, 123.1, 118.4, 116.3, 103.1 (d,  $J$  = 30.2 Hz), 61.2, 14.4. **HRMS-ESI** (m/z) calcd. for [C<sub>24</sub>H<sub>19</sub>FNO<sub>5</sub>S]<sup>+</sup> ([M+H]<sup>+</sup>): 452.0962, found: 452.0960.

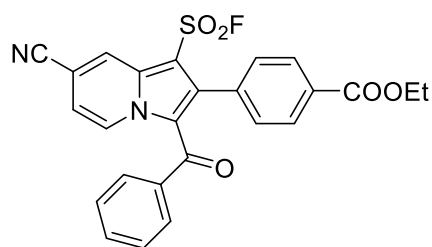

**3k**

*Ethyl 4-(3-benzoyl-7-cyano-1-(fluorosulfonyl)indolizin-2-yl)benzoate (3k)*. Yellow solid, 222 mg, 93% yield. M.p. 224–226 °C. Purification by column chromatography on silica gel using petroleum ether / ethyl acetate (7:1, v/v) as eluent. **<sup>1</sup>H NMR** (500 MHz, CDCl<sub>3</sub>) δ 9.38 (d, *J* = 7.5 Hz, 1H), 8.67 (s, 1H), 7.76 (d, *J* = 8.0 Hz, 2H), 7.40 (d, *J* = 7.5 Hz, 2H), 7.24 (d, *J* = 7.5 Hz, 4H), 7.07 (t, *J* = 7.5 Hz, 2H), 4.30 (q, *J* = 7.0 Hz, 2H), 1.33 (d, *J* = 14.5 Hz, 3H). **<sup>19</sup>F NMR** (471 MHz, CDCl<sub>3</sub>) δ 77.00 (s, 1F). **<sup>13</sup>C NMR** (126 MHz, CDCl<sub>3</sub>) δ 187.6, 165.8, 137.7, 137.2, 135.3, 134.1, 133.3, 131.0, 131.0, 129.4, 129.0, 128.8, 128.3, 124.6, 124.2, 116.4, 115.9, 111.8, 106.6 (d, *J* = 31.6 Hz), 61.3, 14.4. **HRMS-ESI** (*m/z*) calcd. for [C<sub>25</sub>H<sub>18</sub>FN<sub>2</sub>O<sub>5</sub>S]<sup>+</sup> ([M+H]<sup>+</sup>): 477.0915, found: 477.0925.

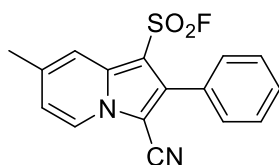

**3I**

*3-cyano-7-methyl-2-phenylindolizine-1-sulfonyl fluoride (3I)*. White solid, 112 mg, 71% yield. M.p. 167–168 °C. Purification by column chromatography on silica gel using petroleum ether / ethyl acetate (7:1, v/v) as eluent. **<sup>1</sup>H NMR** (500 MHz, CDCl<sub>3</sub>) δ 8.33 (d, *J* = 7.0 Hz, 1H), 8.04 (s, 1H), 7.61 – 7.56 (m, 2H), 7.54 – 7.49 (m, 3H), 7.07 (d, *J* = 5.5 Hz, 1H), 2.54 (s, 3H). **<sup>19</sup>F NMR** (471 MHz, CDCl<sub>3</sub>) δ 76.53 (s, 1F). **<sup>13</sup>C NMR** (126 MHz, CDCl<sub>3</sub>) δ 141.1, 140.8, 138.0, 130.1, 129.9, 128.7, 128.5, 125.5, 119.1, 117.8, 111.6, 100.8 (d, *J* = 31.6 Hz), 98.4, 21.9 (d, *J* = 2.2 Hz). **HRMS-ESI** (*m/z*) calcd. for [C<sub>16</sub>H<sub>12</sub>FN<sub>2</sub>O<sub>2</sub>S]<sup>+</sup> ([M+H]<sup>+</sup>): 315.0598, found: 315.0605.

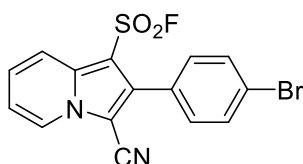

**3m**

*2-(4-bromophenyl)-3-cyanoindolizine-1-sulfonyl fluoride (3m)*. White solid, 173 mg, 91% yield. M.p. 182–183 °C. Purification by column chromatography on silica gel

using petroleum ether / ethyl acetate (7:1, v/v) as eluent. **<sup>1</sup>H NMR** (500 MHz, Chloroform-*d*)  $\delta$  8.46 (d, *J* = 7.0 Hz, 1H), 8.28 (d, *J* = 9.0 Hz, 1H), 7.67 (d, *J* = 8.0 Hz, 2H), 7.59 (t, *J* = 8.0 Hz, 1H), 7.47 (d, *J* = 8.0 Hz, 2H), 7.28 (d, *J* = 7.0 Hz, 1H). **<sup>19</sup>F NMR** (471 MHz, CDCl<sub>3</sub>)  $\delta$  76.60 (s, 1F). **<sup>13</sup>C NMR** (126 MHz, Chloroform-*d*)  $\delta$  139.4, 137.6, 132.2, 131.5, 129.2, 127.2, 126.2, 125.0, 119.3, 116.8, 111.2, 102.4 (d, *J* = 31.6 Hz), 99.0. **HRMS-ESI** (m/z) calcd. for [C<sub>15</sub>H<sub>9</sub>BrFN<sub>2</sub>O<sub>2</sub>S]<sup>+</sup> ([M+H]<sup>+</sup>): 378.9547, found: 378.9540.

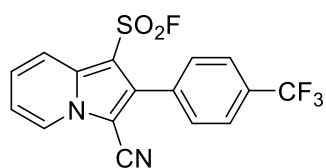

**3n**

*3-cyano-2-(4-(trifluoromethyl)phenyl)indolizine-1-sulfonyl fluoride (3n)*. White solid, 175 mg, 95% yield. M.p. 185–186 °C. Purification by column chromatography on silica gel using petroleum ether / ethyl acetate (7:1, v/v) as eluent. **<sup>1</sup>H NMR** (500 MHz, CDCl<sub>3</sub>)  $\delta$  8.49 (d, *J* = 7.0 Hz, 1H), 8.30 (d, *J* = 9.0 Hz, 1H), 7.80 (d, *J* = 8.0 Hz, 2H), 7.73 (d, *J* = 8.0 Hz, 2H), 7.61 (t, *J* = 8.0 Hz, 1H), 7.30 (t, *J* = 7.0 Hz, 1H). **<sup>19</sup>F NMR** (471 MHz, CDCl<sub>3</sub>)  $\delta$  76.65 (s, 1F), -62.89 (s, 3F). **<sup>13</sup>C NMR** (126 MHz, CDCl<sub>3</sub>)  $\delta$  138.8, 137.6, 132.3, 132.1, 130.5, 129.4, 126.2, 125.8 (q, *J* = 3.7 Hz), 123.9 (d, *J* = 272.6 Hz), 119.3, 117.0, 111.0, 102.6 (d, *J* = 32.2 Hz), 99.3. **HRMS-ESI** (m/z) calcd. for [C<sub>16</sub>H<sub>9</sub>F<sub>4</sub>N<sub>2</sub>O<sub>2</sub>S]<sup>+</sup> ([M+H]<sup>+</sup>): 369.0315, found: 369.0324.

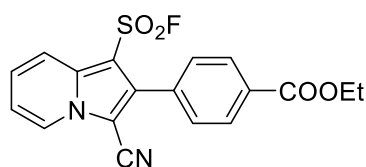

**3o**

*Ethyl 4-(3-cyano-1-(fluorosulfonyl)indolizin-2-yl)benzoate (3o)*. White solid, 171 mg, 92% yield. M.p. 162–163 °C. Purification by column chromatography on silica gel using petroleum ether / ethyl acetate (7:1, v/v) as eluent. **<sup>1</sup>H NMR** (500 MHz, CDCl<sub>3</sub>)  $\delta$  8.47 (d, *J* = 7.0 Hz, 1H), 8.28 (d, *J* = 9.0 Hz, 1H), 8.20 (d, *J* = 8.0 Hz, 2H), 7.67 (d, *J*

= 8.0 Hz, 2H), 7.59 (t,  $J$  = 8.0 Hz, 1H), 7.28 (d,  $J$  = 7.0 Hz, 1H), 4.42 (q,  $J$  = 7.0 Hz, 2H), 1.42 (d,  $J$  = 14.0 Hz, 3H).  **$^{19}\text{F}$  NMR** (471 MHz,  $\text{CDCl}_3$ )  $\delta$  76.65 (s, 1F).  **$^{13}\text{C}$  NMR** (126 MHz,  $\text{CDCl}_3$ )  $\delta$  166.0, 139.4, 137.6, 132.7, 132.1, 130.0, 129.9, 129.2, 126.2, 119.3, 116.9, 111.0, 102.6 (d,  $J$  = 32.2 Hz), 99.2, 61.4, 14.4. **HRMS-ESI** ( $m/z$ ) calcd. for  $[\text{C}_{18}\text{H}_{14}\text{FN}_2\text{O}_4\text{S}]^+$  ( $[\text{M}+\text{H}]^+$ ): 373.0653, found: 373.0652.

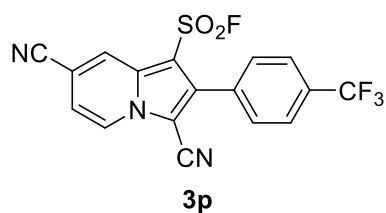

*3,7-dicyano-2-(4-(trifluoromethyl)phenyl)indolizine-1-sulfonyl fluoride (3p)*. White solid, 159 mg, 81% yield. M.p. 210–212 °C. Purification by column chromatography on silica gel using petroleum ether / ethyl acetate (7:1, v/v) as eluent.  **$^1\text{H}$  NMR** (500 MHz,  $\text{CDCl}_3$ )  $\delta$  8.67 (s, 1H), 8.56 (d,  $J$  = 7.0 Hz, 1H), 7.83 (d,  $J$  = 8.0 Hz, 2H), 7.72 (d,  $J$  = 8.0 Hz, 2H), 7.40 (d,  $J$  = 7.0 Hz, 1H).  **$^{19}\text{F}$  NMR** (471 MHz,  $\text{CDCl}_3$ )  $\delta$  76.82 (1F), -63.00 (3F).  **$^{13}\text{C}$  NMR** (126 MHz,  $\text{CDCl}_3$ )  $\delta$  139.85, 135.07, 132.80 (q,  $J$  = 33.0 Hz), 130.90, 130.41, 126.92, 126.13 (q,  $J$  = 3.8 Hz), 125.04, 123.75 (d,  $J$  = 272.8 Hz), 116.87, 115.81, 112.53, 109.88, 106.49 (d,  $J$  = 33.2 Hz), 101.47. **HRMS-ESI** ( $m/z$ ) calcd. for  $[\text{C}_{17}\text{H}_8\text{F}_4\text{N}_3\text{O}_2\text{S}]^+$  ( $[\text{M}+\text{H}]^+$ ): 394.0268, found: 394.0279.

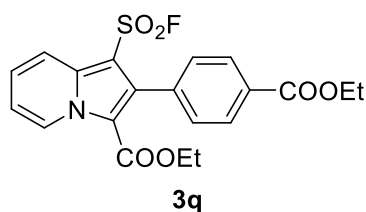

*Ethyl 2-(4-(ethoxycarbonyl)phenyl)-1-(fluorosulfonyl)indolizine-3-carboxylate (3q)*. White solid, 203 mg, 97% yield. M.p. 130–131 °C. Purification by column chromatography on silica gel using petroleum ether / ethyl acetate (7:1, v/v) as eluent.  **$^1\text{H}$  NMR** (500 MHz,  $\text{CDCl}_3$ )  $\delta$  9.72 (d,  $J$  = 7.0 Hz, 1H), 8.26 (d,  $J$  = 9.0 Hz, 1H), 8.11 (d,  $J$  = 8.0 Hz, 2H), 7.57 – 7.50 (m, 1H), 7.43 (d,  $J$  = 8.0 Hz, 2H), 7.18 (t,  $J$  = 7.0 Hz,

1H), 4.41 (q,  $J = 7.0$  Hz, 2H), 4.06 (q,  $J = 7.0$  Hz, 2H), 1.42 (t,  $J = 7.0$  Hz, 3H), 0.85 (t,  $J = 7.0$  Hz, 3H).  **$^{19}\text{F}$  NMR** (471 MHz,  $\text{CDCl}_3$ )  $\delta$  76.31 (s, 1F).  **$^{13}\text{C}$  NMR** (126 MHz,  $\text{CDCl}_3$ )  $\delta$  166.5, 160.9, 137.6, 137.5, 137.1, 130.5, 129.7, 128.8, 128.6, 128.5, 118.1, 116.0, 115.0, 103.6 (d,  $J = 29.4$  Hz), 61.2, 60.9, 14.5, 13.6. **HRMS-ESI** ( $m/z$ ) calcd. for  $[\text{C}_{20}\text{H}_{19}\text{FNO}_6\text{S}]^+$  ( $[\text{M}+\text{H}]^+$ ): 420.0912, found: 420.0913.

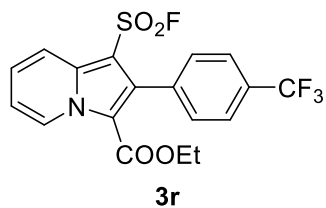

*Ethyl 1-(fluorosulfonyl)-2-(4-(trifluoromethyl)phenyl)indolizine-3-carboxylate (3r).* White solid, 181 mg, 87% yield. M.p. 126–127 °C. Purification by column chromatography on silica gel using petroleum ether / ethyl acetate (7:1, v/v) as eluent.  **$^1\text{H}$  NMR** (500 MHz,  $\text{CDCl}_3$ )  $\delta$  9.73 (d,  $J = 7.0$  Hz, 1H), 8.27 (d,  $J = 9.0$  Hz, 1H), 7.70 (d,  $J = 8.0$  Hz, 2H), 7.59 – 7.52 (m, 1H), 7.49 (d,  $J = 8.0$  Hz, 2H), 7.20 (t,  $J = 7.0$  Hz, 1H), 4.06 (q,  $J = 7.0$  Hz, 2H), 0.83 (t,  $J = 7.0$  Hz, 3H).  **$^{19}\text{F}$  NMR** (471 MHz,  $\text{CDCl}_3$ )  $\delta$  76.26 (s, 1F), -62.49 (s, 3F).  **$^{13}\text{C}$  NMR** (126 MHz,  $\text{CDCl}_3$ )  $\delta$  160.8, 137.5, 137.1, 136.3, 130.7 (q,  $J = 32.6$  Hz), 130.1, 128.6 (d,  $J = 6.0$  Hz), 125.4, 124.6 (q,  $J = 3.8$  Hz), 123.2, 118.2, 116.2, 115.1, 103.6 (d,  $J = 29.6$  Hz), 60.9, 13.3. **HRMS-ESI** ( $m/z$ ) calcd. for  $[\text{C}_{18}\text{H}_{14}\text{F}_4\text{NO}_4\text{S}]^+$  ( $[\text{M}+\text{H}]^+$ ): 416.0574, found: 416.0577.

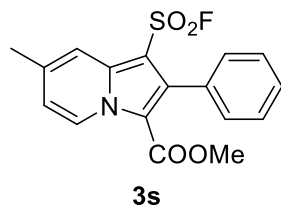

*Methyl 1-(fluorosulfonyl)-7-methyl-2-phenylindolizine-3-carboxylate (3s).* White solid, 127 mg, 73% yield. M.p. 163–164 °C. Purification by column chromatography on silica gel using petroleum ether / ethyl acetate (10:1, v/v) as eluent.  **$^1\text{H}$  NMR** (500 MHz,  $\text{CDCl}_3$ )  $\delta$  9.56 (d,  $J = 7.0$  Hz, 1H), 8.03 (s, 1H), 7.45 – 7.40 (m, 3H), 7.37 – 7.32 (m, 2H), 6.99 (d,  $J = 5.5$  Hz, 1H), 3.57 (s, 3H), 2.52 (s, 3H).  **$^{19}\text{F}$  NMR** (471 MHz,  $\text{CDCl}_3$ )

$\delta$  76.26 (s, 1F).  **$^{13}\text{C}$  NMR** (126 MHz,  $\text{CDCl}_3$ )  $\delta$  161.7, 140.2, 139.1, 138.0, 132.0, 129.6, 128.4, 128.0, 127.5, 118.3, 116.8, 114.3, 102.4 (d,  $J = 29.1$  Hz), 51.5, 21.7. **HRMS-ESI** (m/z) calcd. for  $[\text{C}_{17}\text{H}_{15}\text{FNO}_4\text{S}]^+$  ( $[\text{M}+\text{H}]^+$ ): 348.0700, found: 348.0699.

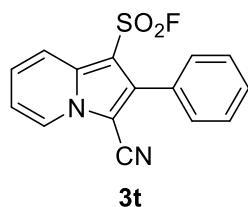

*3-cyano-2-phenylindolizine-1-sulfonyl fluoride (3t)*. White solid, 143 mg, 95% yield. M.p. 169–170 °C. Purification by column chromatography on silica gel using petroleum ether / ethyl acetate (7:1, v/v) as eluent.  **$^1\text{H}$  NMR** (500 MHz,  $\text{CDCl}_3$ )  $\delta$  8.46 (d,  $J = 7.0$  Hz, 1H), 8.28 (d,  $J = 9.0$  Hz, 1H), 7.64 – 7.50 (m, 6H), 7.24 (d,  $J = 7.0$  Hz, 1H).  **$^{19}\text{F}$  NMR** (471 MHz,  $\text{CDCl}_3$ )  $\delta$  76.55 (s, 1F).  **$^{13}\text{C}$  NMR** (126 MHz,  $\text{CDCl}_3$ )  $\delta$  140.7, 137.6, 130.2, 129.9, 129.0, 128.8, 128.3, 126.2, 119.2, 116.6, 111.4, 102.4 (d,  $J = 31.8$  Hz), 99.1. **HRMS-ESI** (m/z) calcd. for  $[\text{C}_{15}\text{H}_{10}\text{FN}_2\text{O}_2\text{S}]^+$  ( $[\text{M}+\text{H}]^+$ ): 301.0442, found: 301.0450.

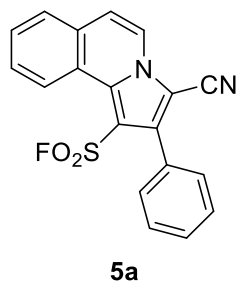

*3-cyano-2-phenylpyrrolo[2,1-a]isoquinoline-1-sulfonyl fluoride (5a)*. White solid, 163 mg, 93% yield. M.p. 245–247 °C. Purification by column chromatography on silica gel using petroleum ether / ethyl acetate (5:1, v/v) as eluent.  **$^1\text{H}$  NMR** (500 MHz,  $\text{DMSO}-d_6$ )  $\delta$  8.82 – 8.78 (m, 1H), 8.52 (d,  $J = 7.0$  Hz, 1H), 8.16 – 8.12 (m, 1H), 7.91 – 7.87 (m, 2H), 7.81 (d,  $J = 7.0$  Hz, 1H), 7.56 (s, 5H).  **$^{19}\text{F}$  NMR** (471 MHz,  $\text{DMSO}-d_6$ )  $\delta$  71.09 (s, 1F).  **$^{13}\text{C}$  NMR** (126 MHz,  $\text{DMSO}-d_6$ )  $\delta$  139.5, 133.4, 130.7, 130.6, 129.8, 129.5, 129.4, 129.3, 128.5, 128.2, 125.5, 123.4, 121.3, 117.8, 111.2, 104.5 (d,  $J = 32.7$  Hz), 100.9. **HRMS-ESI** (m/z) calcd. for  $[\text{C}_{19}\text{H}_{12}\text{FN}_2\text{O}_2\text{S}]^+$  ( $[\text{M}+\text{H}]^+$ ): 351.0598, found: 351.0605.

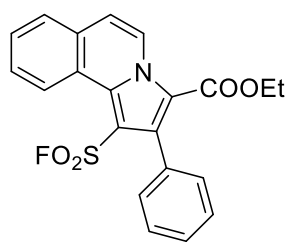

**5b**

*Ethyl 1-(fluorosulfonyl)-2-phenylpyrrolo[2,1-a]isoquinoline-3-carboxylate (5b).*

White solid, 198 mg, 99% yield. M.p. 187–188 °C. Purification by column chromatography on silica gel using petroleum ether / ethyl acetate (5:1, v/v) as eluent.

$^1\text{H}$  NMR (500 MHz,  $\text{CDCl}_3$ )  $\delta$  9.48 (d,  $J = 7.5$  Hz, 1H), 9.03 (d,  $J = 7.5$  Hz, 1H), 7.83 (d,  $J = 6.0$  Hz, 1H), 7.72 (p,  $J = 8.0, 7.0$  Hz, 2H), 7.42 (q,  $J = 4.0, 3.3$  Hz, 3H), 7.35 (q,  $J = 5.5, 3.5$  Hz, 3H), 4.05 (q,  $J = 7.0$  Hz, 2H), 0.83 (t,  $J = 7.0$  Hz, 3H).  $^{19}\text{F}$  NMR (471 MHz,  $\text{CDCl}_3$ )  $\delta$  70.73 (s, 1F).  $^{13}\text{C}$  NMR (126 MHz,  $\text{CDCl}_3$ )  $\delta$  161.2, 138.1, 134.1, 133.5, 130.5, 130.0, 128.8, 128.0, 127.5, 127.5, 127.1, 127.0, 124.2, 122.5, 116.5, 116.2, 107.9 (d,  $J = 30.5$  Hz), 60.9, 13.4. HRMS-ESI ( $m/z$ ) calcd. for  $[\text{C}_{21}\text{H}_{17}\text{FNO}_4\text{S}]^+$  ( $[\text{M}+\text{H}]^+$ ): 398.0857, found: 398.0856.

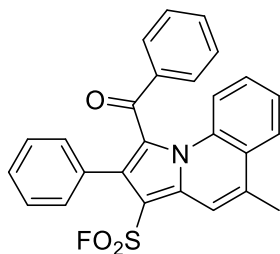

**5c**

*1-benzoyl-5-methyl-2-phenylpyrrolo[1,2-a]quinoline-3-sulfonyl fluoride (5c).* Yellow

solid, 144 mg, 65% yield. M.p. 207–208 °C. Purification by column chromatography on silica gel using petroleum ether / ethyl acetate (10:1, v/v) as eluent.

$^1\text{H}$  NMR (500 MHz,  $\text{CDCl}_3$ )  $\delta$  8.00 (s, 1H), 7.93 (d,  $J = 8.0$  Hz, 1H), 7.68 (d,  $J = 7.5$  Hz, 2H), 7.58 (d,  $J = 8.5$  Hz, 1H), 7.45 (t,  $J = 7.5$  Hz, 1H), 7.37 (dt,  $J = 14.0, 7.5$  Hz, 2H), 7.22 – 7.17 (m, 4H), 7.14 – 7.07 (m, 3H), 2.67 (s, 3H).  $^{19}\text{F}$  NMR (471 MHz,  $\text{CDCl}_3$ )  $\delta$  75.93 (s, 1F).  $^{13}\text{C}$  NMR (126 MHz,  $\text{CDCl}_3$ )  $\delta$  189.4, 137.5, 136.9, 136.6, 134.0, 133.6, 132.1, 130.6, 130.2, 130.0, 129.5, 128.6, 128.5, 127.7, 126.6, 126.1, 126.0, 125.4, 119.2, 115.5,

104.2 (d,  $J = 29.0$  Hz), 19.8. **HRMS-ESI** ( $m/z$ ) calcd. for  $[C_{26}H_{19}FNO_3S]^+$  ( $[M+H]^+$ ): 444.1064, found: 444.1069.

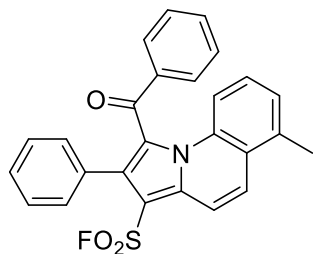

**5d**

*1-benzoyl-6-methyl-2-phenylpyrrolo[1,2-a]quinoline-3-sulfonyl fluoride (5d)*. Yellow solid, 122 mg, 55% yield. M.p. 208–209 °C. Purification by column chromatography on silica gel using petroleum ether / ethyl acetate (10:1, v/v) as eluent.  **$^1H$  NMR** (500 MHz,  $CDCl_3$ )  $\delta$  8.26 (d,  $J = 9.5$  Hz, 1H), 7.83 (d,  $J = 7.5$  Hz, 2H), 7.76 (d,  $J = 9.5$  Hz, 1H), 7.71 (s, 1H), 7.60 (d,  $J = 9.0$  Hz, 1H), 7.52 (t,  $J = 7.5$  Hz, 1H), 7.39 – 7.32 (m, 5H), 7.25 (d,  $J = 6.5$  Hz, 3H), 2.54 (s, 3H).  **$^{19}F$  NMR** (471 MHz,  $CDCl_3$ )  $\delta$  75.98 (s, 1F).  **$^{13}C$  NMR** (126 MHz,  $CDCl_3$ )  $\delta$  189.6, 137.4, 136.2, 136.1, 134.1, 133.2, 131.2, 130.60, 130.4, 130.1, 130.0, 129.2, 129.0, 128.7, 128.5, 127.8, 126.7, 125.1, 118.5, 116.0, 105.1 (d,  $J = 29.1$  Hz), 21.0. **HRMS-ESI** ( $m/z$ ) calcd. for  $[C_{26}H_{19}FNO_3S]^+$  ( $[M+H]^+$ ): 444.1064, found: 444.1062.

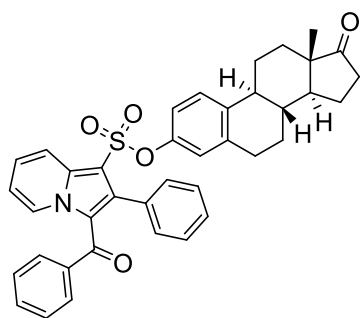

**6**

*(8R,9S,13S,14S)-13-methyl-17-oxo-7,8,9,11,12,13,14,15,16,17-decahydro-6H-cyclopenta[a]phenanthren-3-yl 3-benzoyl-2-phenylindolizine-1-sulfonate (6)*. White solid, 249 mg, 99% yield. M.p. 210–211 °C. Purification by column chromatography on silica gel using petroleum ether / ethyl acetate (3:1, v/v) as eluent.  **$^1H$  NMR** (500

MHz, CDCl<sub>3</sub>)  $\delta$  9.47 (d,  $J$  = 7.0 Hz, 1H), 8.28 (d,  $J$  = 9.0 Hz, 1H), 7.44 (t,  $J$  = 8.0 Hz, 1H), 7.38 (d,  $J$  = 7.5 Hz, 2H), 7.19 (t,  $J$  = 7.5 Hz, 1H), 7.12 – 6.96 (m, 9H), 6.55 (dd,  $J$  = 12.0, 3.1 Hz, 2H), 2.77 – 2.64 (m, 2H), 2.49 (dd,  $J$  = 19.0, 8.5 Hz, 1H), 2.32 (p,  $J$  = 7.0, 6.0 Hz, 1H), 2.25 – 2.04 (m, 3H), 1.95 (td,  $J$  = 12.0, 8.5, 3.5 Hz, 2H), 1.53 – 1.35 (m, 5H), 1.28 – 1.23 (m, 1H), 0.89 (s, 3H). <sup>13</sup>C NMR (126 MHz, CDCl<sub>3</sub>)  $\delta$  188.3, 147.4, 138.7, 138.6, 138.5, 138.2, 137.9, 131.8, 131.7, 131.2, 131.0, 129.3, 128.9, 128.2, 128.0, 127.9, 127.7, 127.2, 126.4, 122.7, 122.2, 119.1, 118.7, 115.5, 106.3, 50.5, 48.0, 44.2, 38.0, 35.9, 29.4, 26.3, 25.8, 21.7, 13.9. HRMS-ESI ( $m/z$ ) calcd. for [C<sub>39</sub>H<sub>36</sub>NO<sub>5</sub>S]<sup>+</sup> ([M+H]<sup>+</sup>): 630.2309, found: 630.2318.

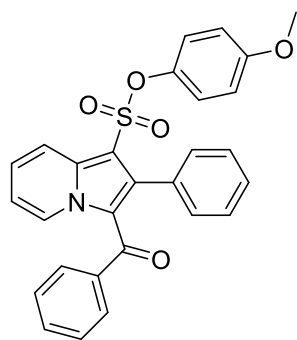

7

*4-methoxyphenyl 3-benzoyl-2-phenylindolizine-1-sulfonate (7)*. Light yellow solid, 239 mg, 99% yield. M.p. 162–163 °C. Purification by column chromatography on silica gel using petroleum ether / ethyl acetate (3:1, v/v) as eluent. <sup>1</sup>H NMR (500 MHz, CDCl<sub>3</sub>)  $\delta$  9.49 (d,  $J$  = 7.0 Hz, 1H), 8.19 (d,  $J$  = 9.0 Hz, 1H), 7.40 (dd,  $J$  = 23.0, 7.5 Hz, 3H), 7.19 (t,  $J$  = 7.5 Hz, 1H), 7.05 (ddd,  $J$  = 27.0, 14.0, 7.0 Hz, 8H), 6.77 (d,  $J$  = 8.5 Hz, 2H), 6.69 (d,  $J$  = 9.0 Hz, 2H), 3.73 (s, 3H). <sup>13</sup>C NMR (126 MHz, CDCl<sub>3</sub>)  $\delta$  188.3, 158.2, 143.0, 138.7, 138.0, 131.8, 131.6, 131.1, 129.3, 128.2, 128.1, 127.8, 127.2, 123.3, 122.7, 118.6, 116.2, 115.5, 114.9, 114.5, 105.9, 55.7. HRMS-ESI ( $m/z$ ) calcd. for [C<sub>28</sub>H<sub>22</sub>NO<sub>5</sub>S]<sup>+</sup> ([M+H]<sup>+</sup>): 484.1213, found: 484.1208.

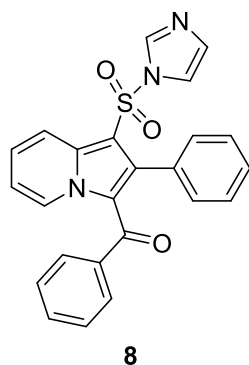

(1-((1*H*-imidazol-1-yl)sulfonyl)-2-phenylindolizin-3-yl)(phenyl)methanone (**8**). White solid, 212 mg, 99% yield. M.p. 173–174 °C. Purification by column chromatography on silica gel using petroleum ether / ethyl acetate (1:1, v/v) as eluent. **<sup>1</sup>H NMR** (500 MHz, CDCl<sub>3</sub>)  $\delta$  9.46 (d, *J* = 7.0 Hz, 1H), 8.52 (d, *J* = 9.0 Hz, 1H), 7.58 (t, *J* = 8.0 Hz, 1H), 7.36 (d, *J* = 7.5 Hz, 2H), 7.17 (q, *J* = 7.0, 5.5 Hz, 3H), 7.09 (t, *J* = 7.5 Hz, 1H), 7.03 (t, *J* = 7.5 Hz, 4H), 6.98 (d, *J* = 7.5 Hz, 2H), 6.79 (s, 1H), 6.74 (s, 1H). **<sup>13</sup>C NMR** (126 MHz, CDCl<sub>3</sub>)  $\delta$  188.0, 138.3, 137.9, 137.6, 136.3, 132.0, 131.6, 130.4, 129.8, 129.2, 129.1, 128.8, 128.5, 127.8, 127.5, 123.4, 118.3, 116.7, 116.0, 108.0. **HRMS-ESI** (*m/z*) calcd. for [C<sub>24</sub>H<sub>18</sub>N<sub>3</sub>O<sub>3</sub>S]<sup>+</sup> ([*M*+*H*)<sup>+</sup>): 428.1063, found: 428.1072.

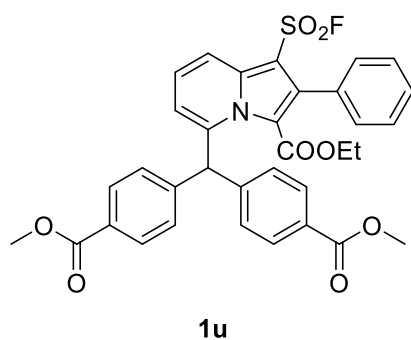

Dimethyl 4,4'-((3-(ethoxycarbonyl)-1-(fluorosulfonyl)-2-phenylindolizin-5-yl)methylene)dibenzoate (**1u**). Yellow solid, 192 mg, 61% yield. M.p. 189–190 °C. Purification by column chromatography on silica gel using petroleum ether / ethyl acetate (5:1, v/v) as eluent. **<sup>1</sup>H NMR** (500 MHz, CDCl<sub>3</sub>)  $\delta$  8.30 (d, *J* = 9.0 Hz, 1H), 7.44 – 7.34 (m, 4H), 7.28 – 7.23 (m, 2H), 7.06 (d, *J* = 9.0 Hz, 4H), 6.96 (d, *J* = 8.0 Hz, 4H), 6.57 (d, *J* = 9.0 Hz, 2H), 3.69 (q, *J* = 7.0 Hz, 2H), 2.31 (s, 6H), 0.55 (t, *J* = 7.0 Hz, 3H). **<sup>19</sup>F NMR** (471 MHz, CDCl<sub>3</sub>)  $\delta$  76.20 (s, 1F). **<sup>13</sup>C NMR** (126 MHz, CDCl<sub>3</sub>)  $\delta$  169.2, 161.9, 150.2, 143.2, 138.4, 136.7, 136.1, 131.4, 130.6, 130.0, 128.4, 127.5, 126.9, 122.2,

120.9, 118.9, 117.0, 102.9 (d,  $J = 28.9$  Hz), 61.8, 51.9, 21.2, 12.9. **HRMS-ESI** (m/z)  
calcd. for  $[\text{C}_{34}\text{H}_{29}\text{FNO}_8\text{S}]^+$  ( $[\text{M}+\text{H}]^+$ ): 630.1592, found: 630.1601.

## 6. References

1. D. S. Allgäuer, P. Mayer and H. Mayr, *J. Am. Chem. Soc.*, 2013, **135**, 15216-15224.
2. G. Sumanth, K. Lakshmikanth, S. M. Saini, P. Mundhe, K. Shivaprasad and S. Chandrashekhara, *J. Mol. Struct.*, 2023, **1273**, 134350.
3. L. Lucescu, A. Ghinet, D. Belei, B. Rigo, J. Dubois and E. Bîcu, *Bioorg. Med. Chem. Lett.*, 2015, **25**, 3975-3979.
4. G. M. Yang, Z. P. Li, Y. H. Liu, D. H. Guo, X. J. Sheng and J. Wang, *Org. Lett.*, 2021, **23**, 8109-8113.
5. X. Y. Hou, S. Zhou, Y. L. Li, M. J. Guo, W. T. Zhao, X. Y. Tang and G. W. Wang, *Org. Lett.*, 2020, **22**, 9313-9318.
6. H. Xiong, J. P. Wu and H. L. Qin, *Org. Chem. Front.*, 2023, **10**, 342-347.
7. M. J. Liu, E. Fayad, O. A. Abu Ali, X. F. Tao and H. L. Qin, *J. Org. Chem.*, 2024, **89**, 13709-13718.
8. Q. Zheng, J. Dong and K. B. Sharpless, *J. Org. Chem.*, 2016, **81**, 11360-11362.

## 7. NMR spectra

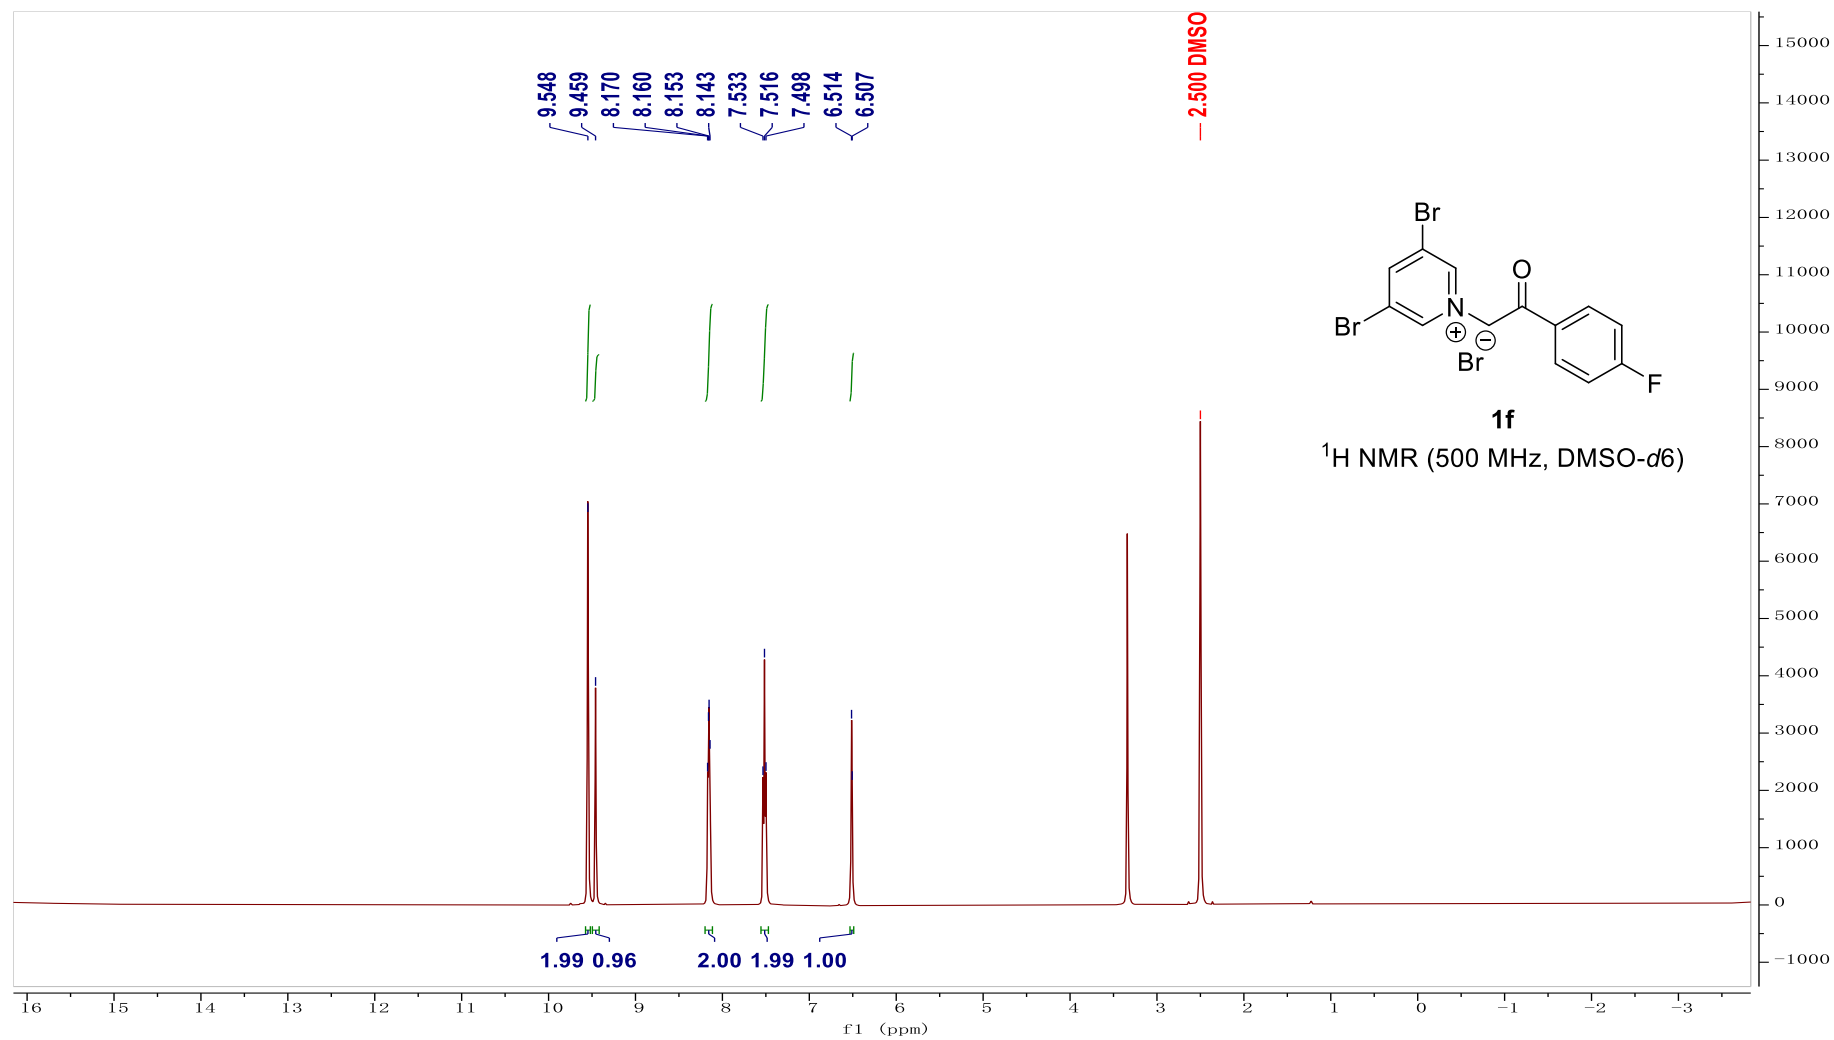

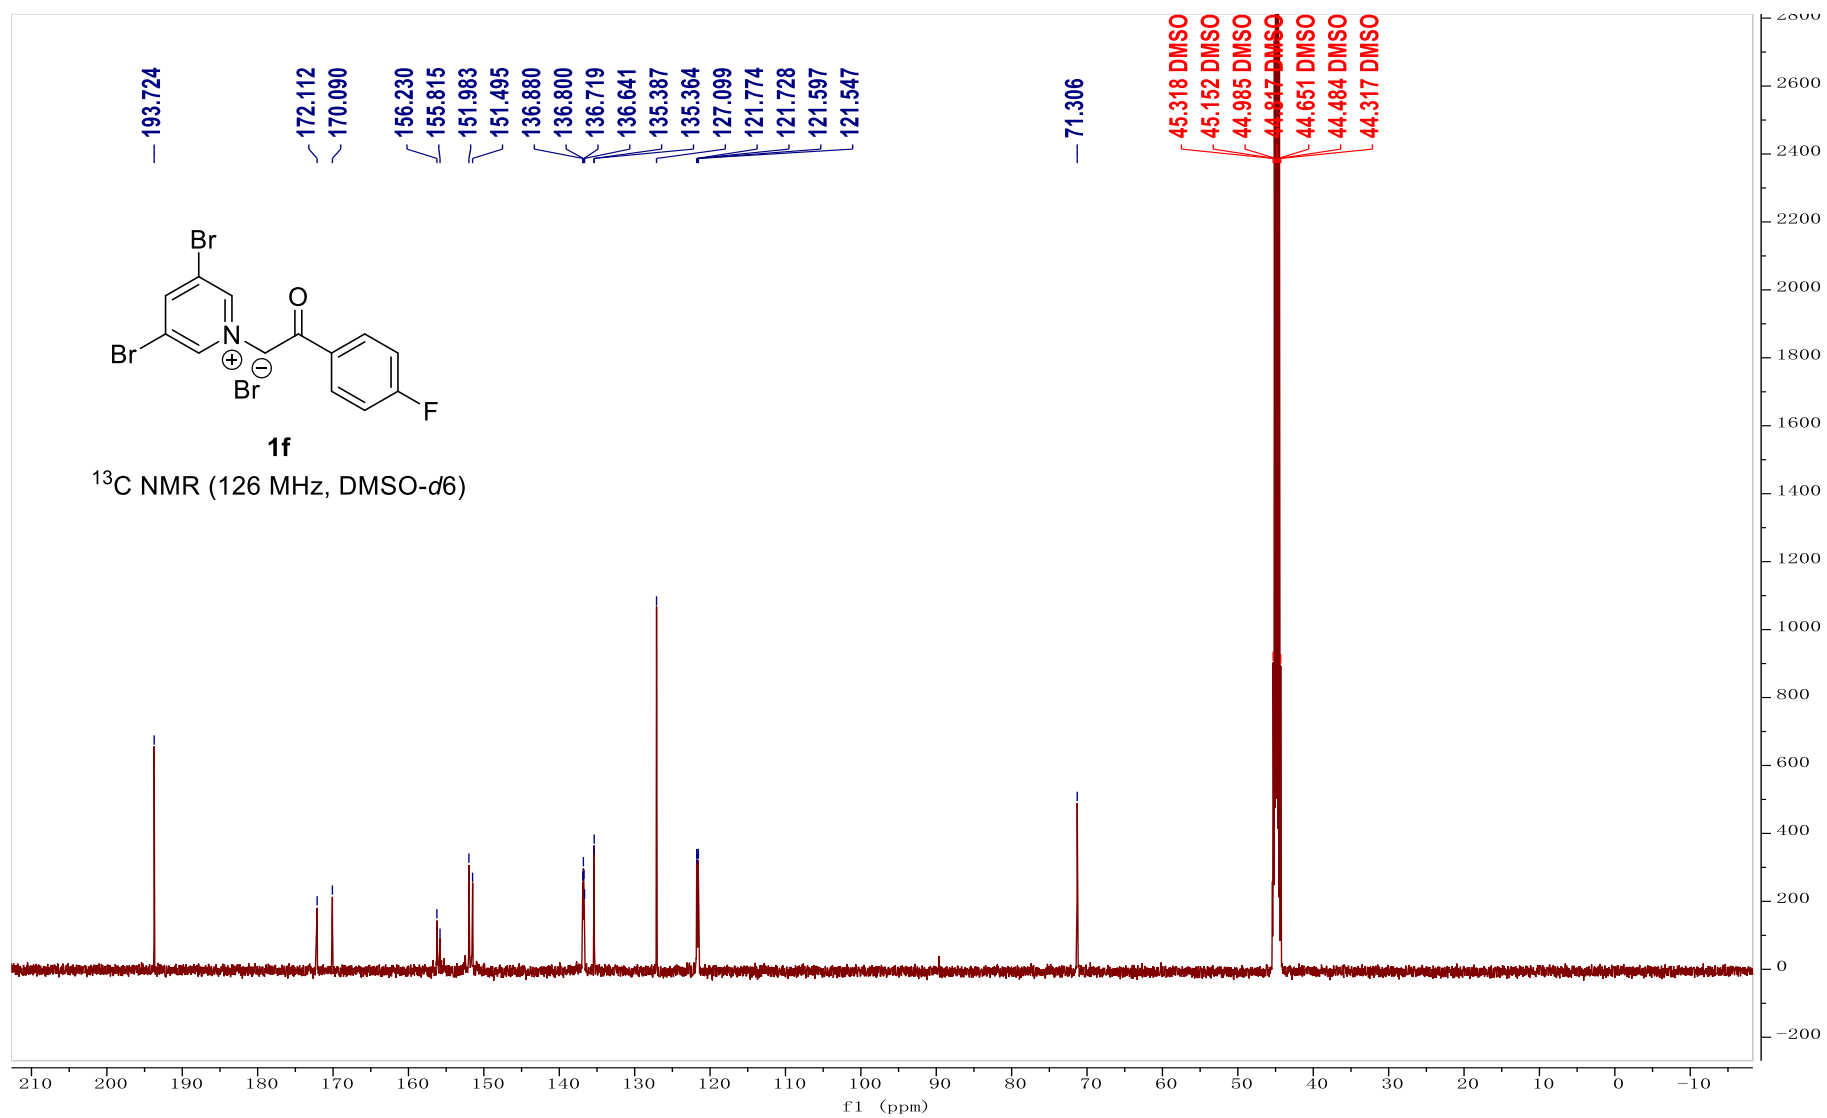

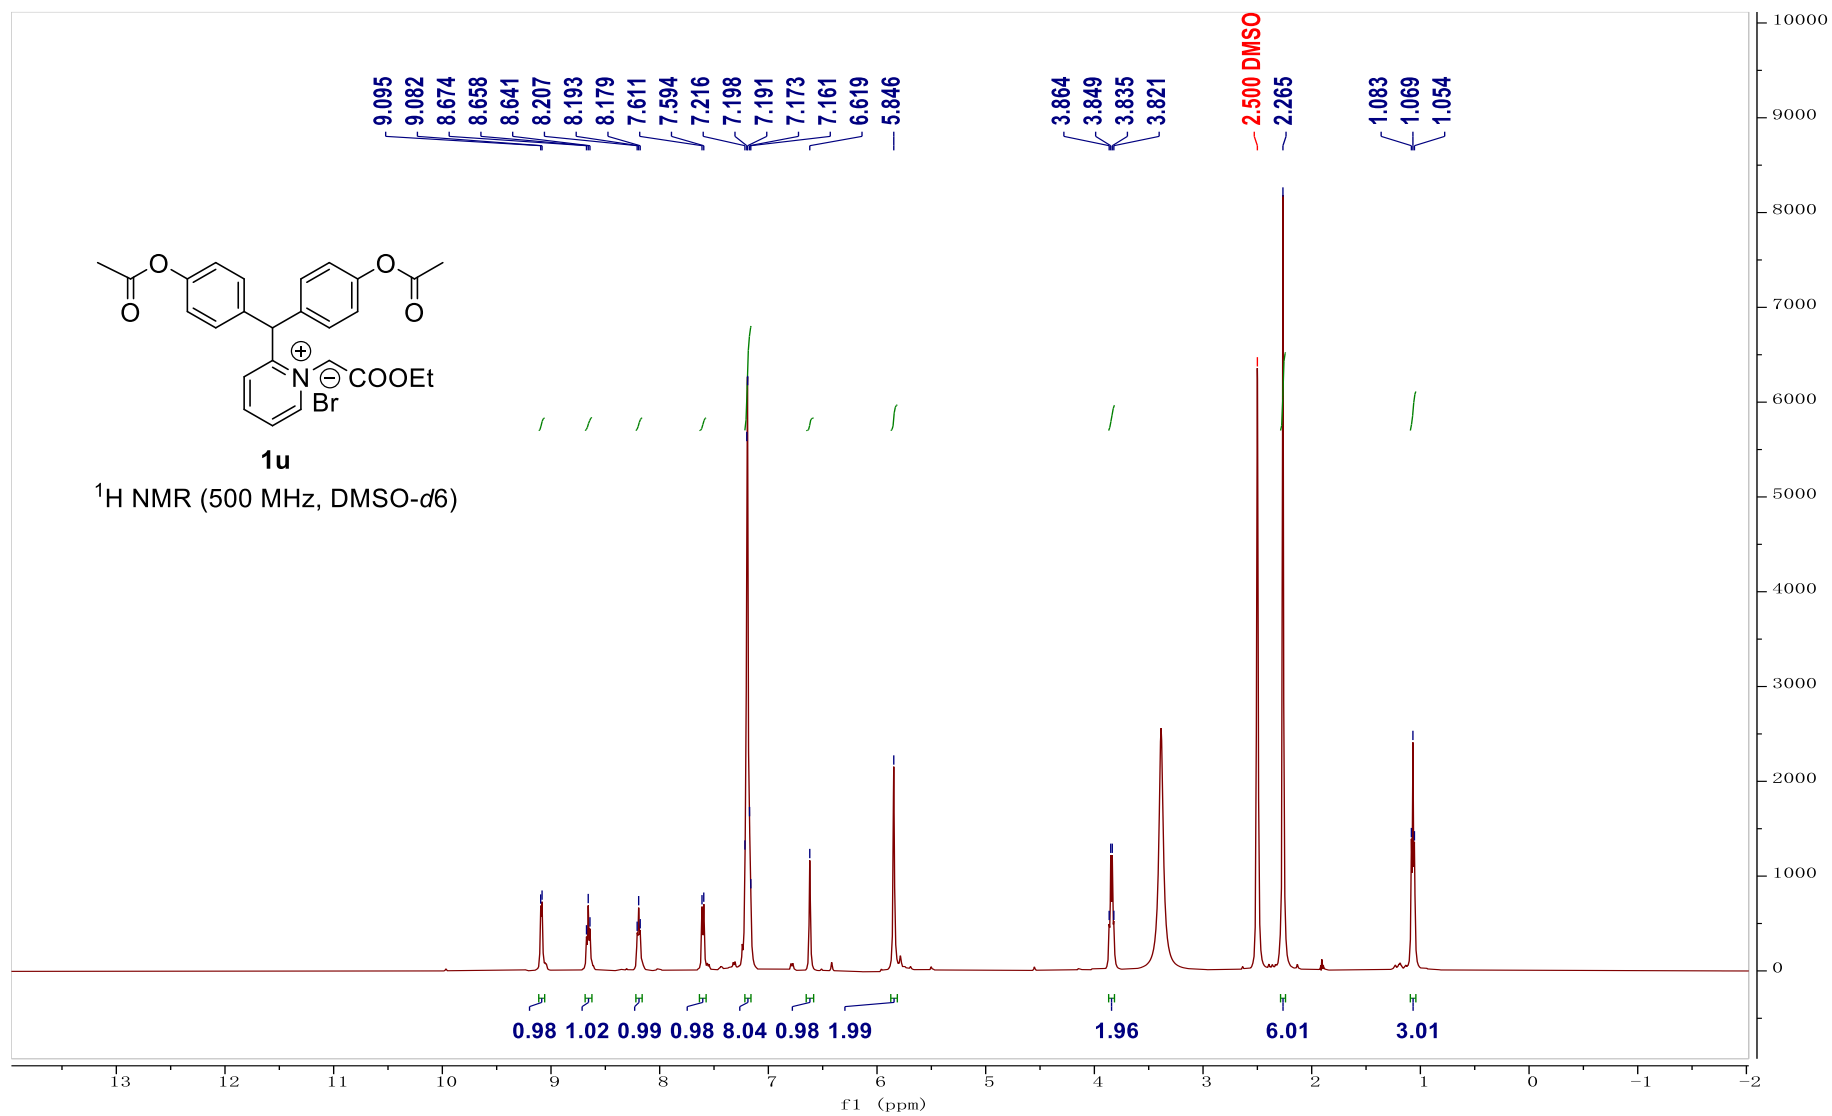

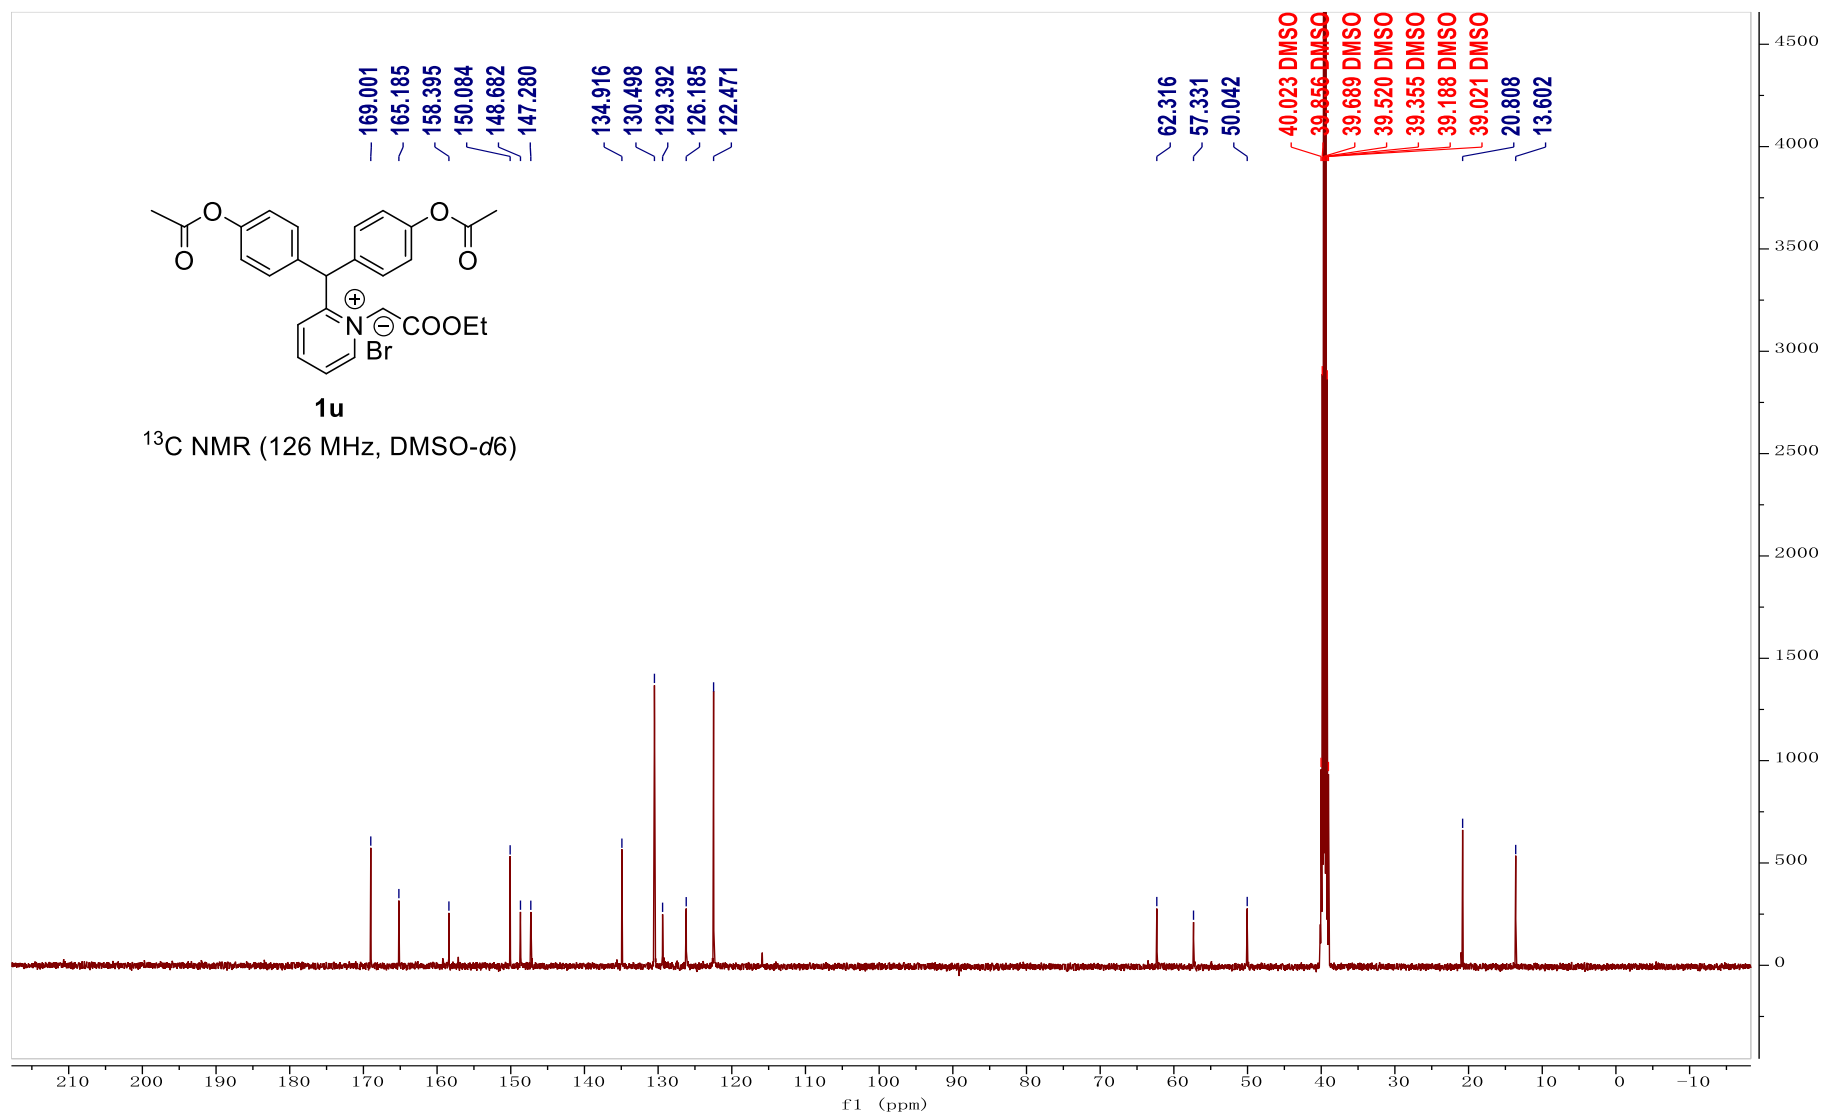

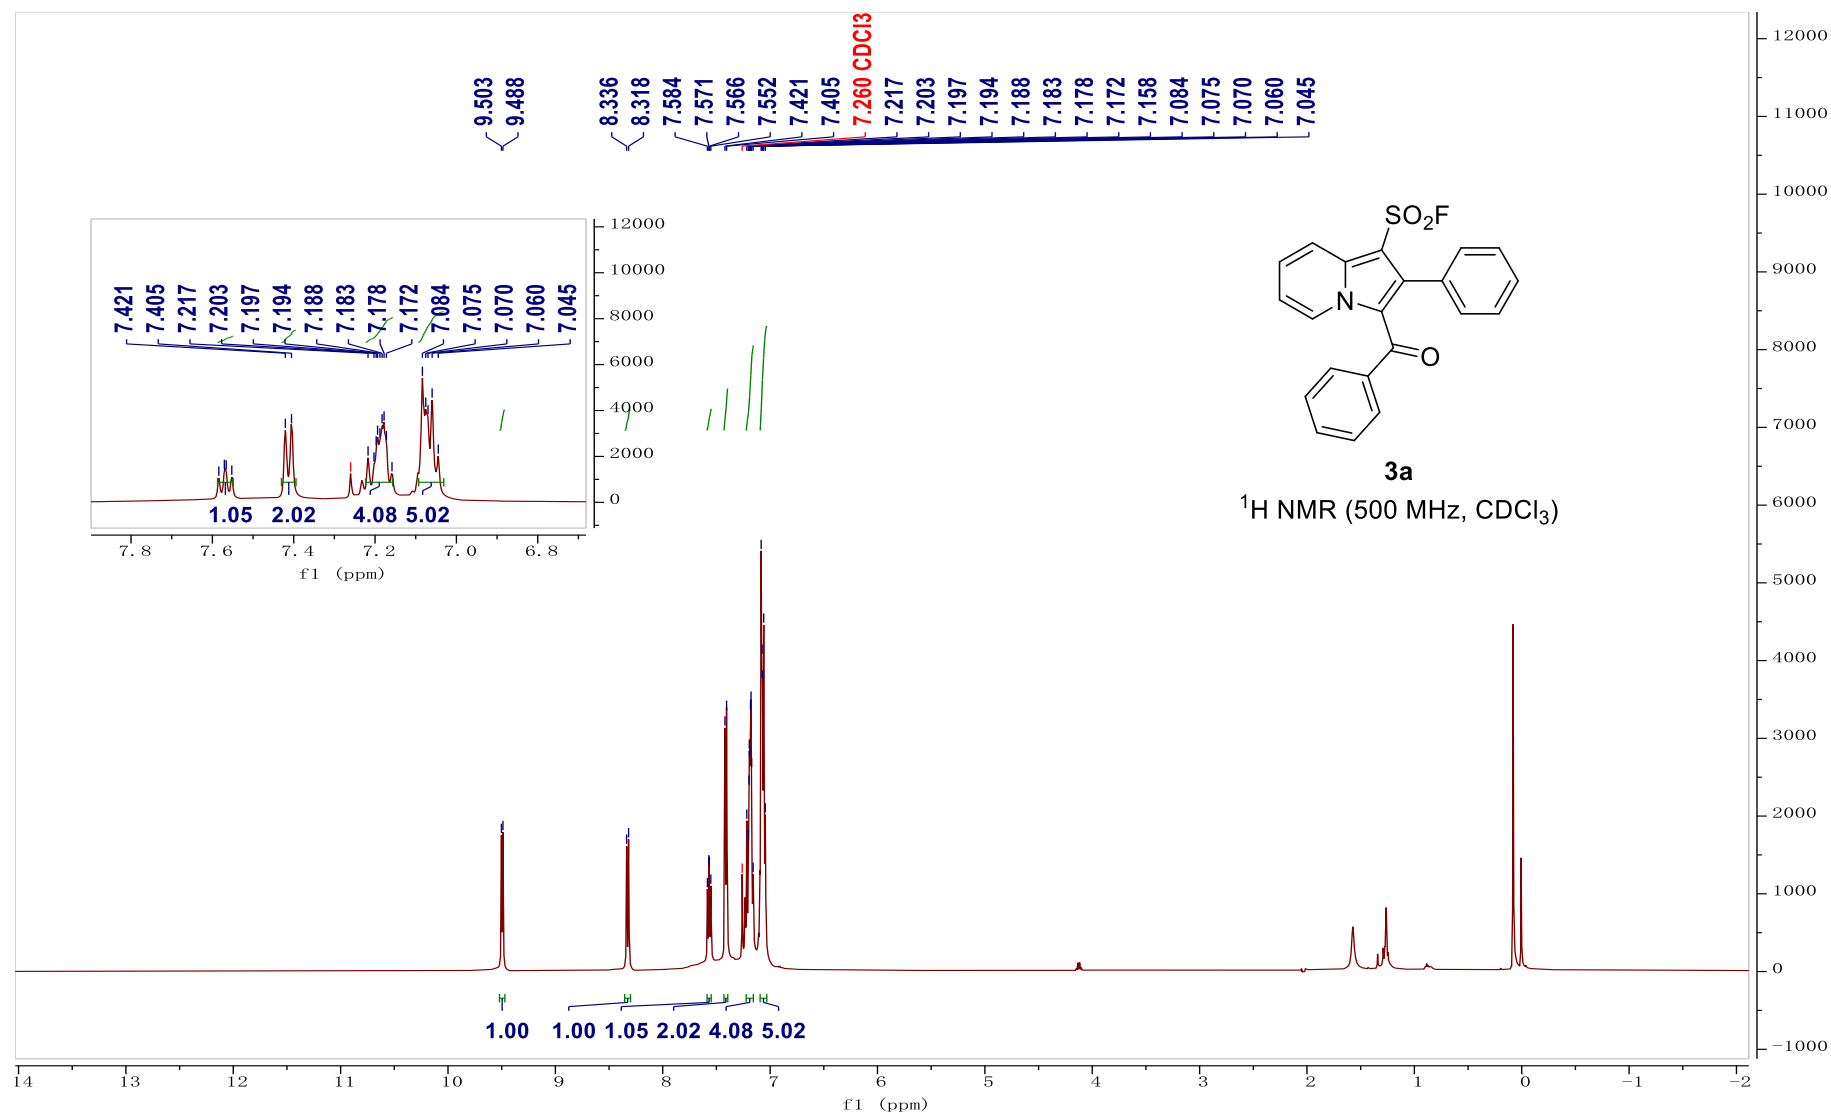

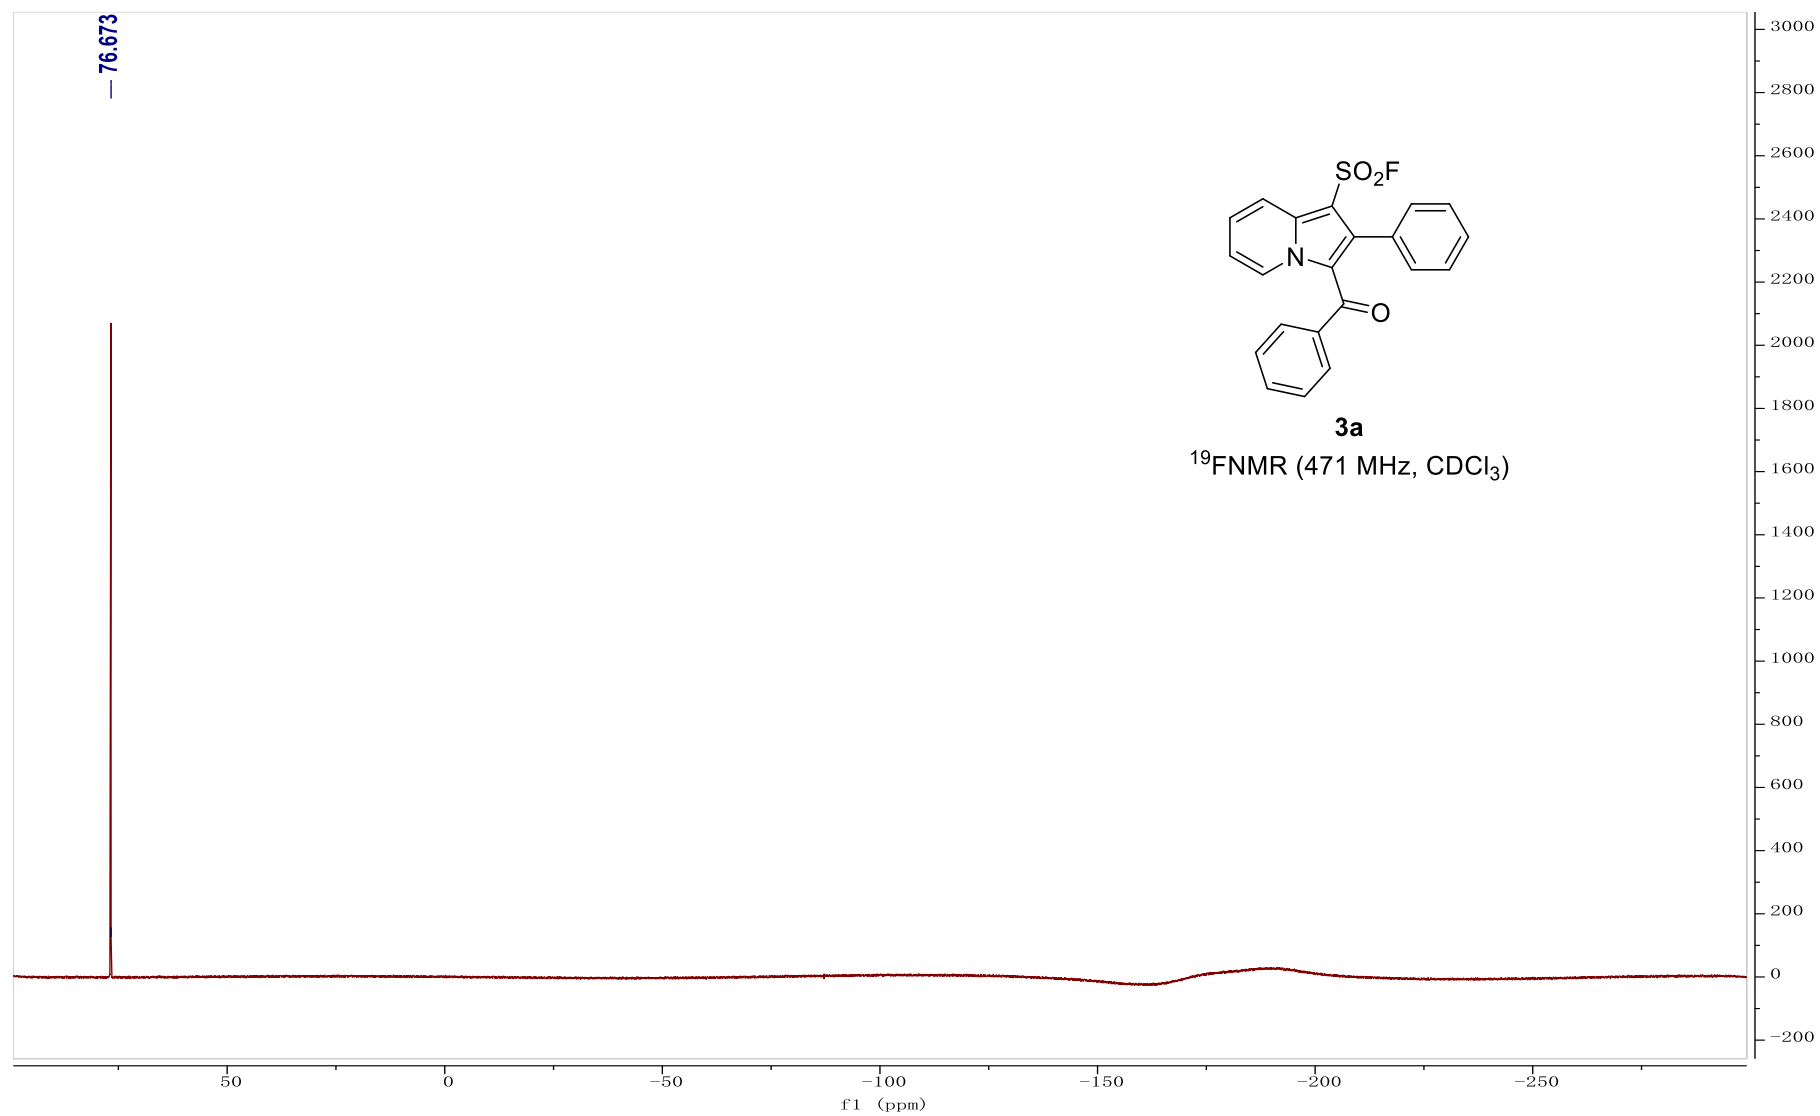

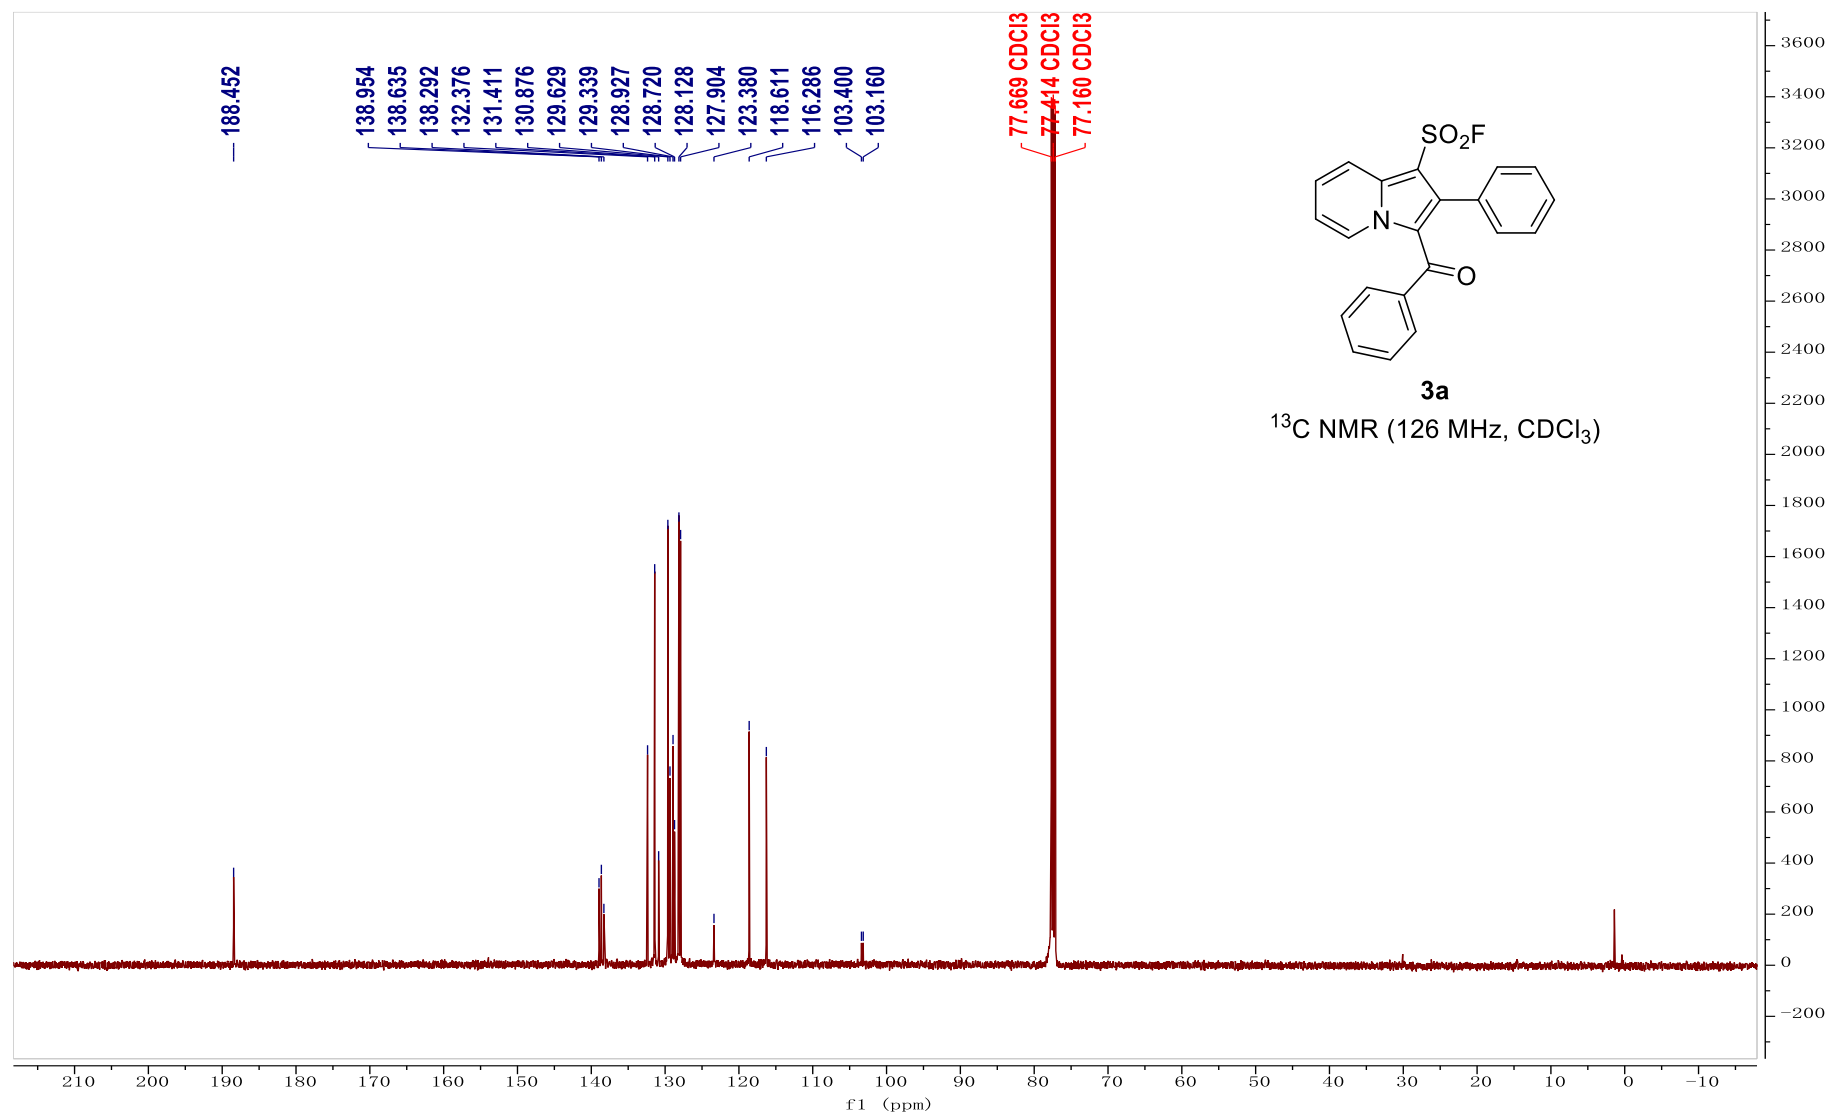

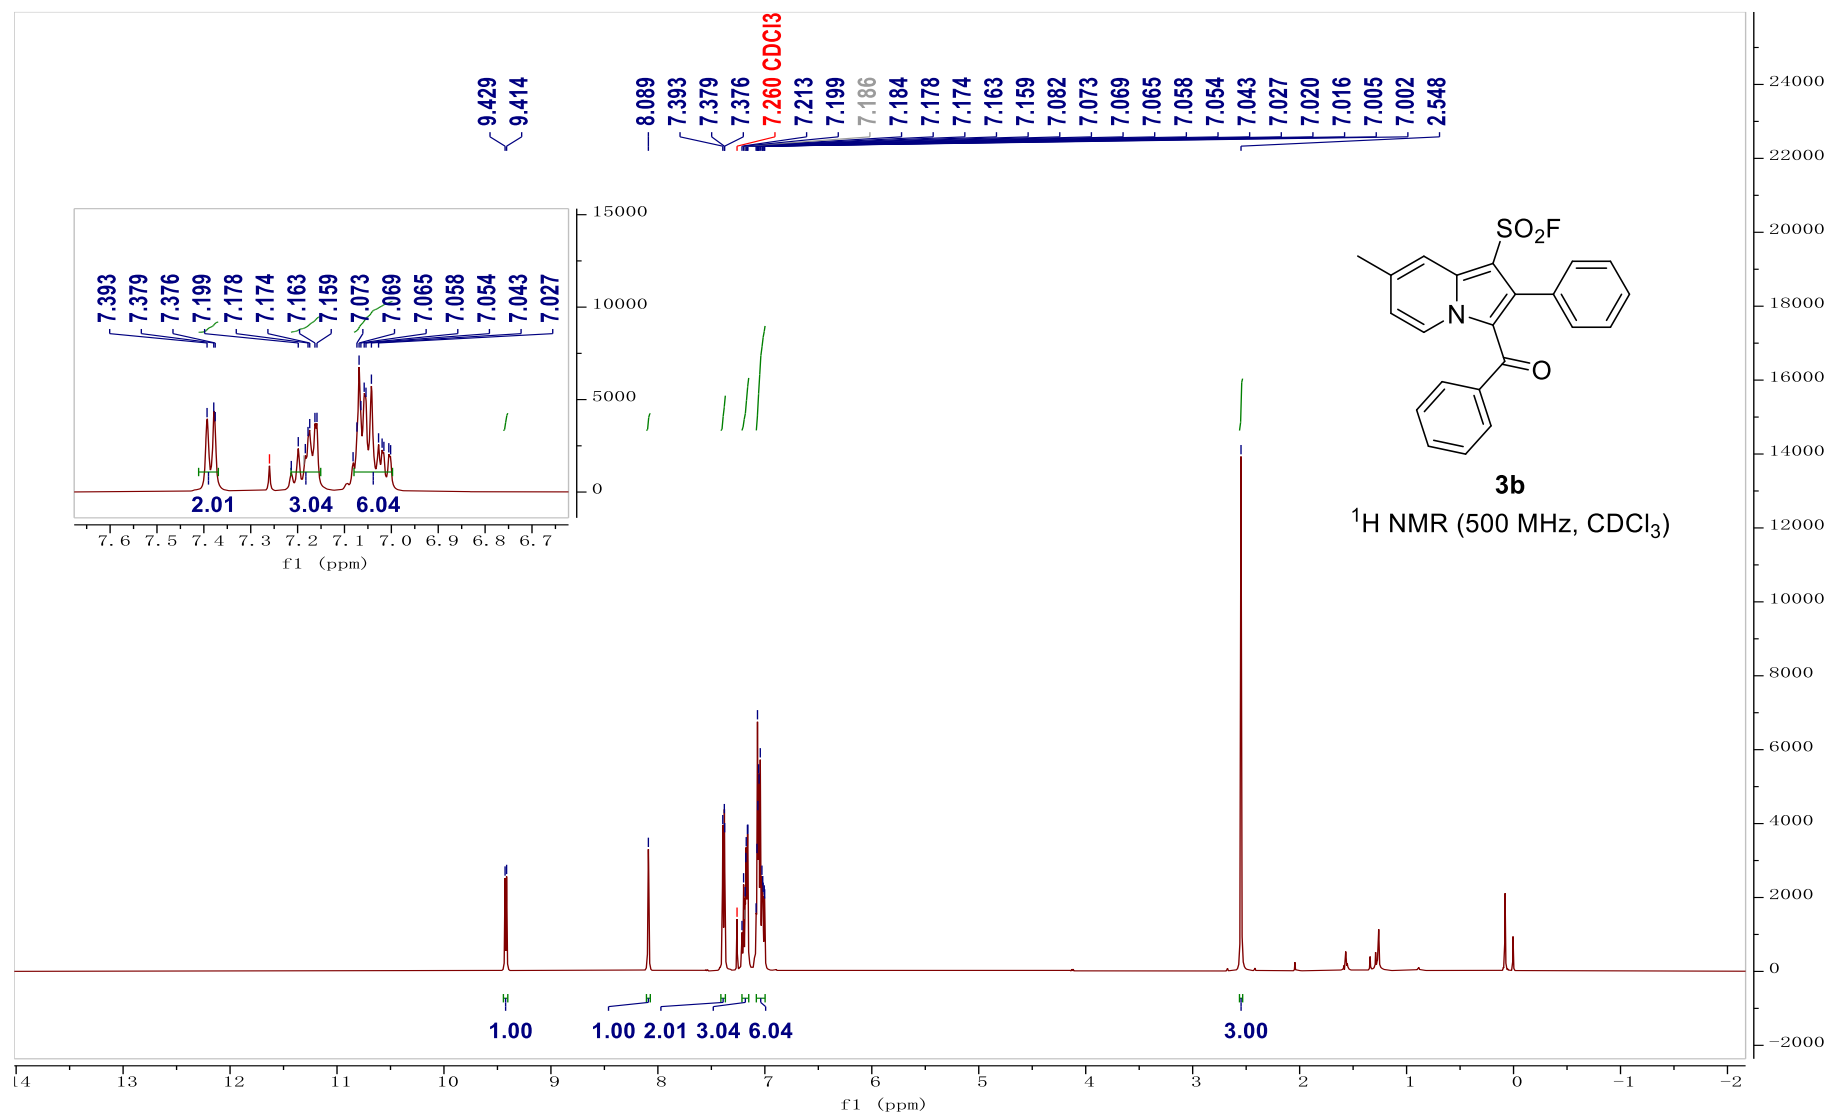

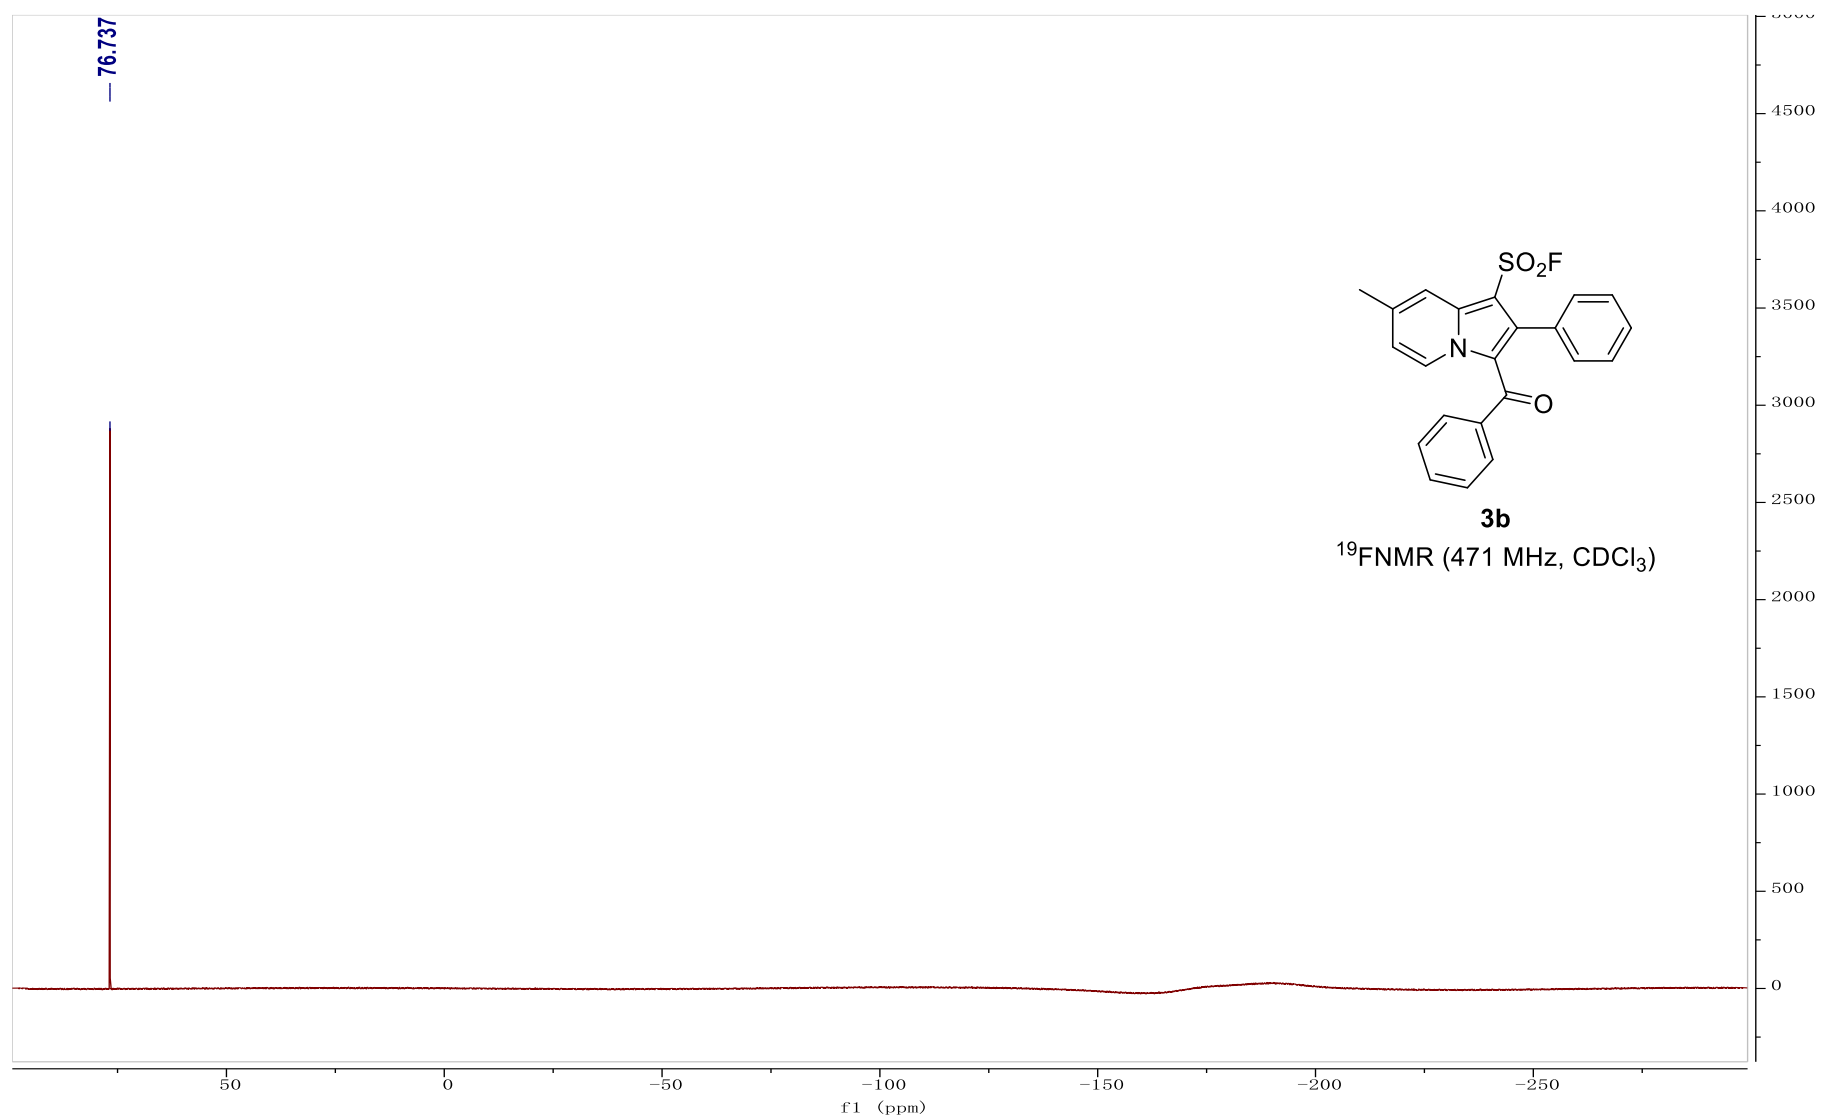

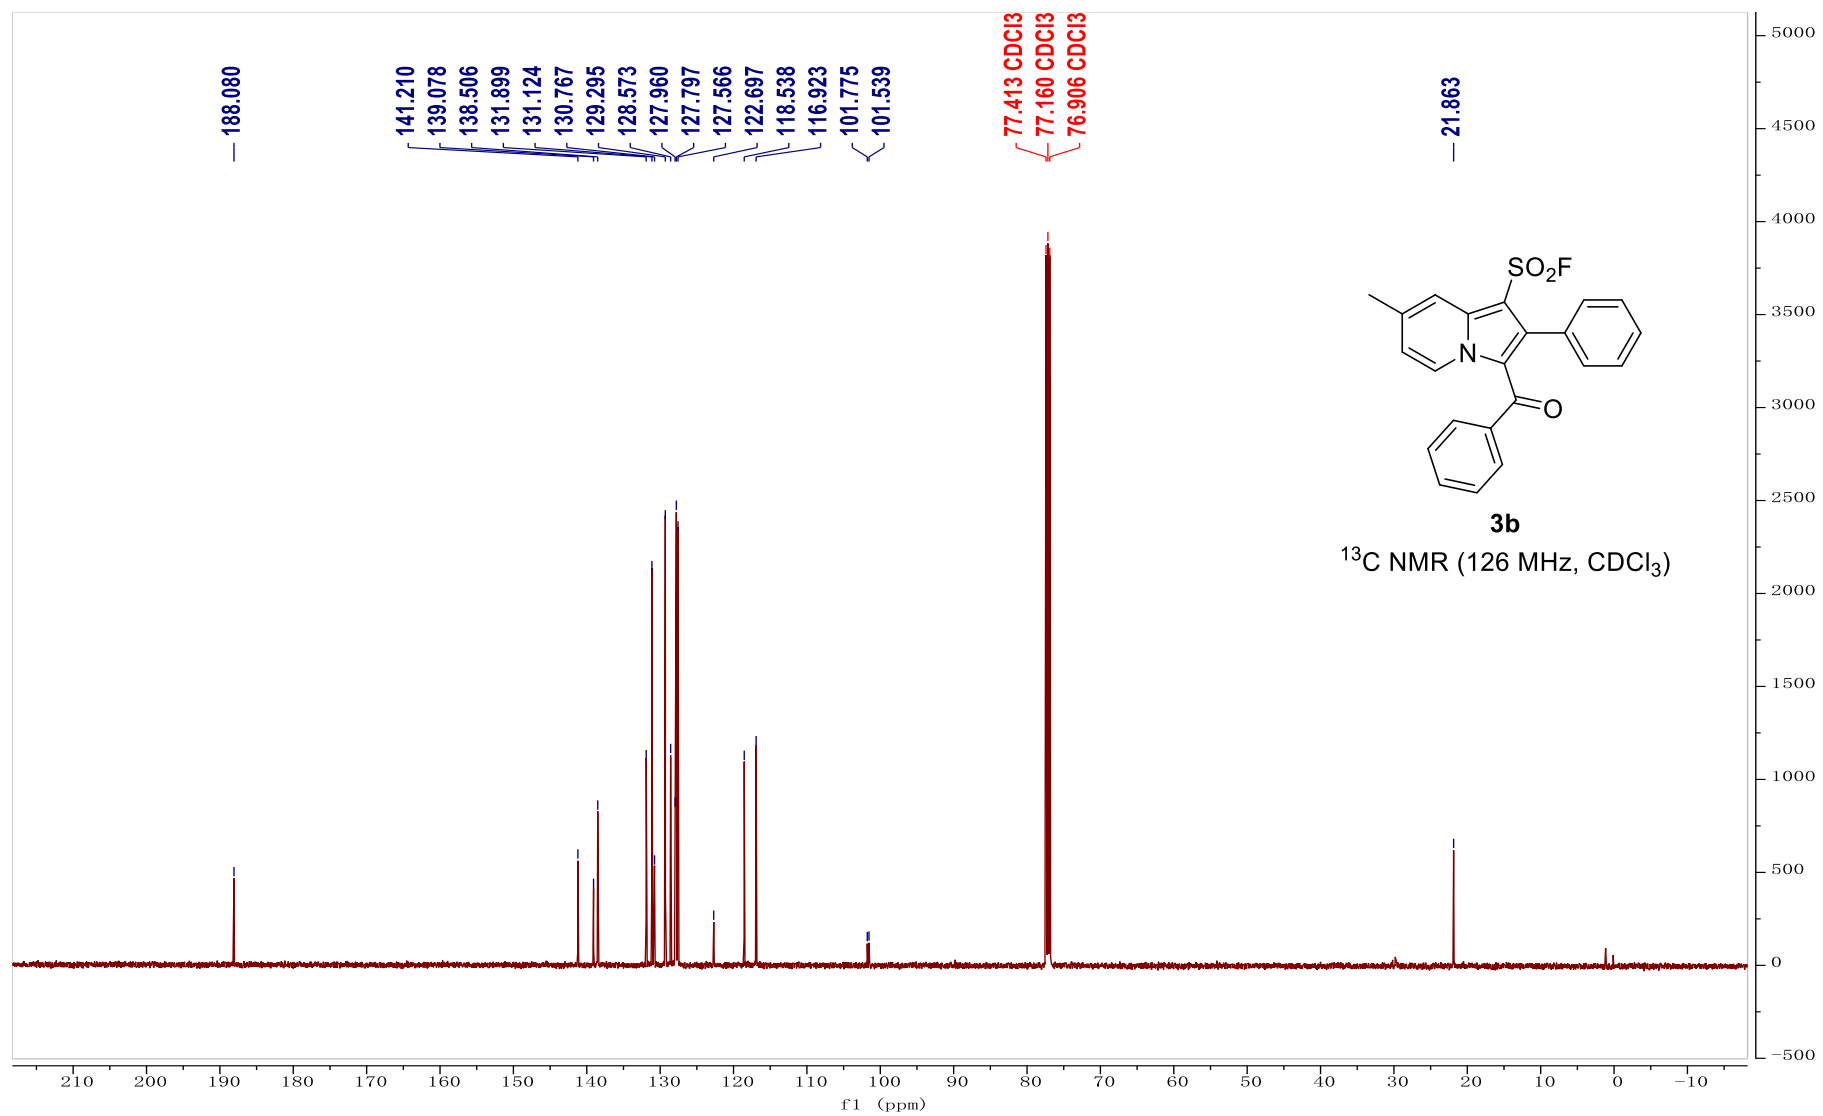

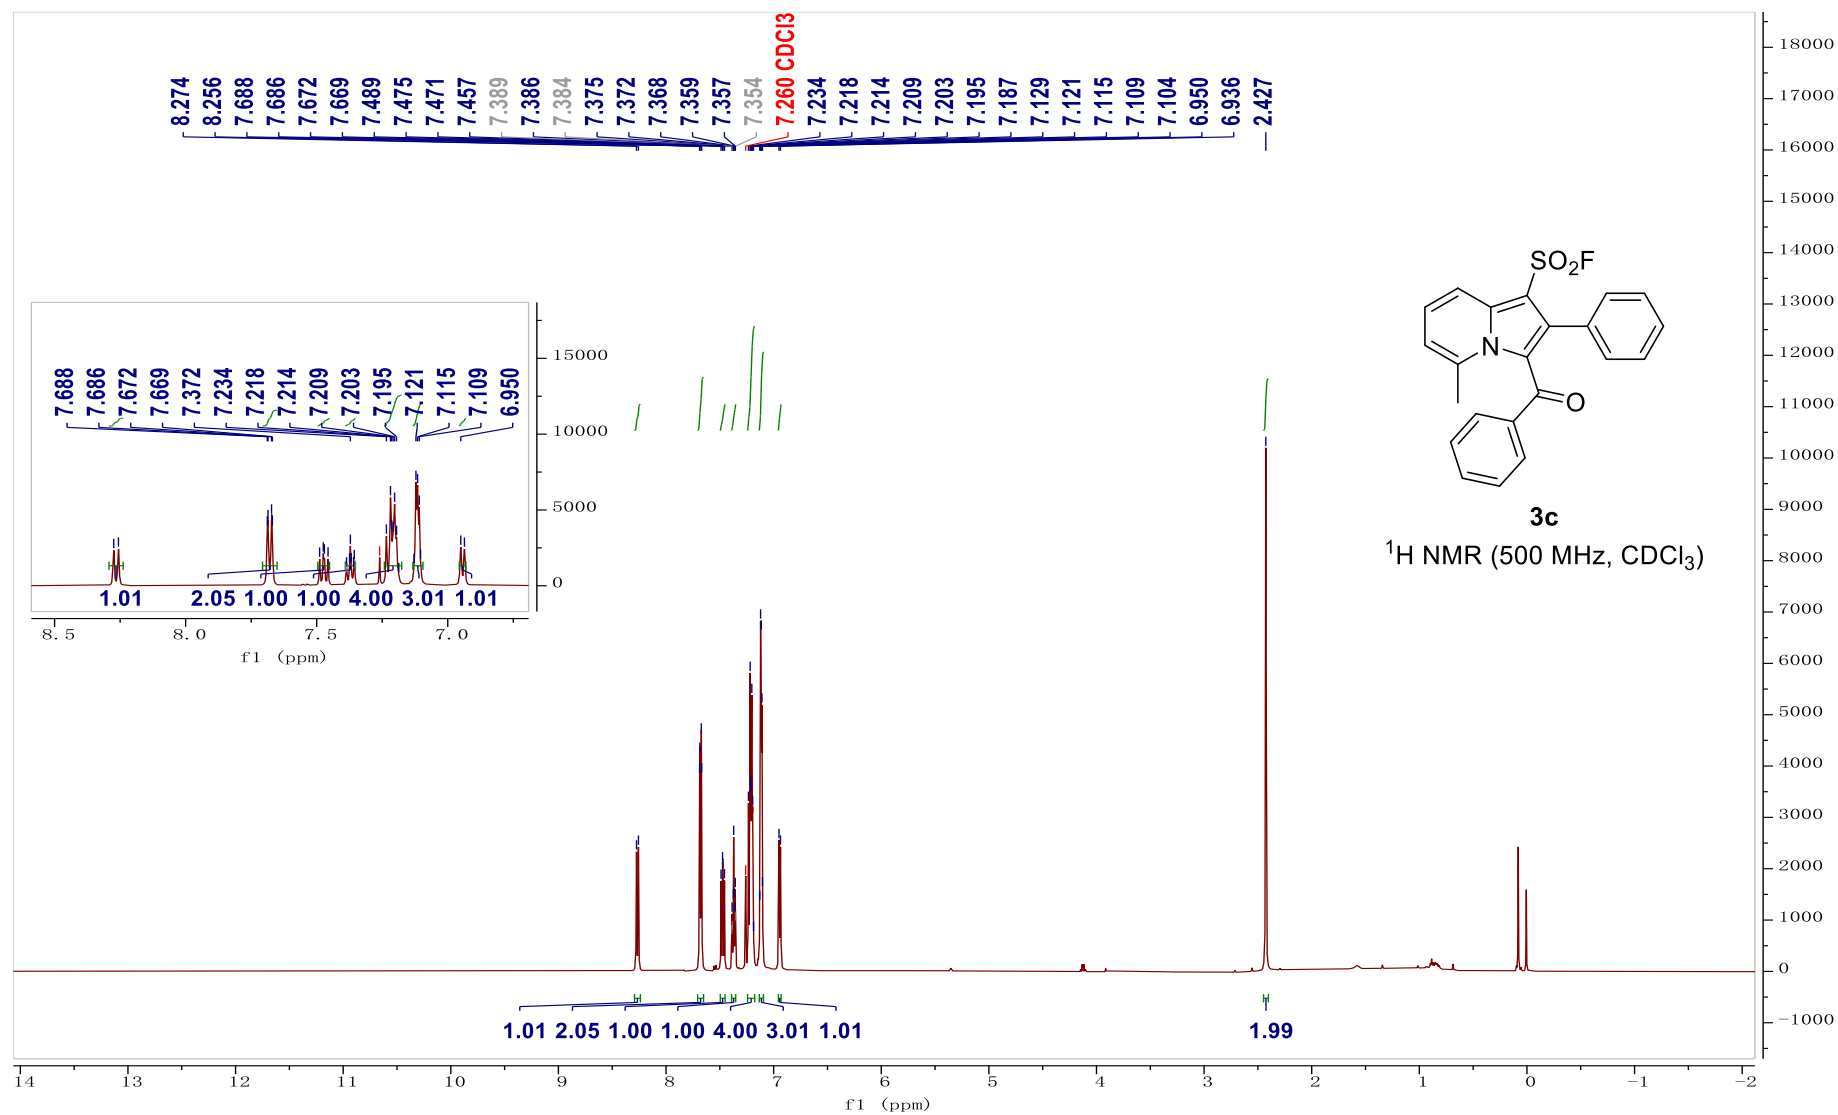

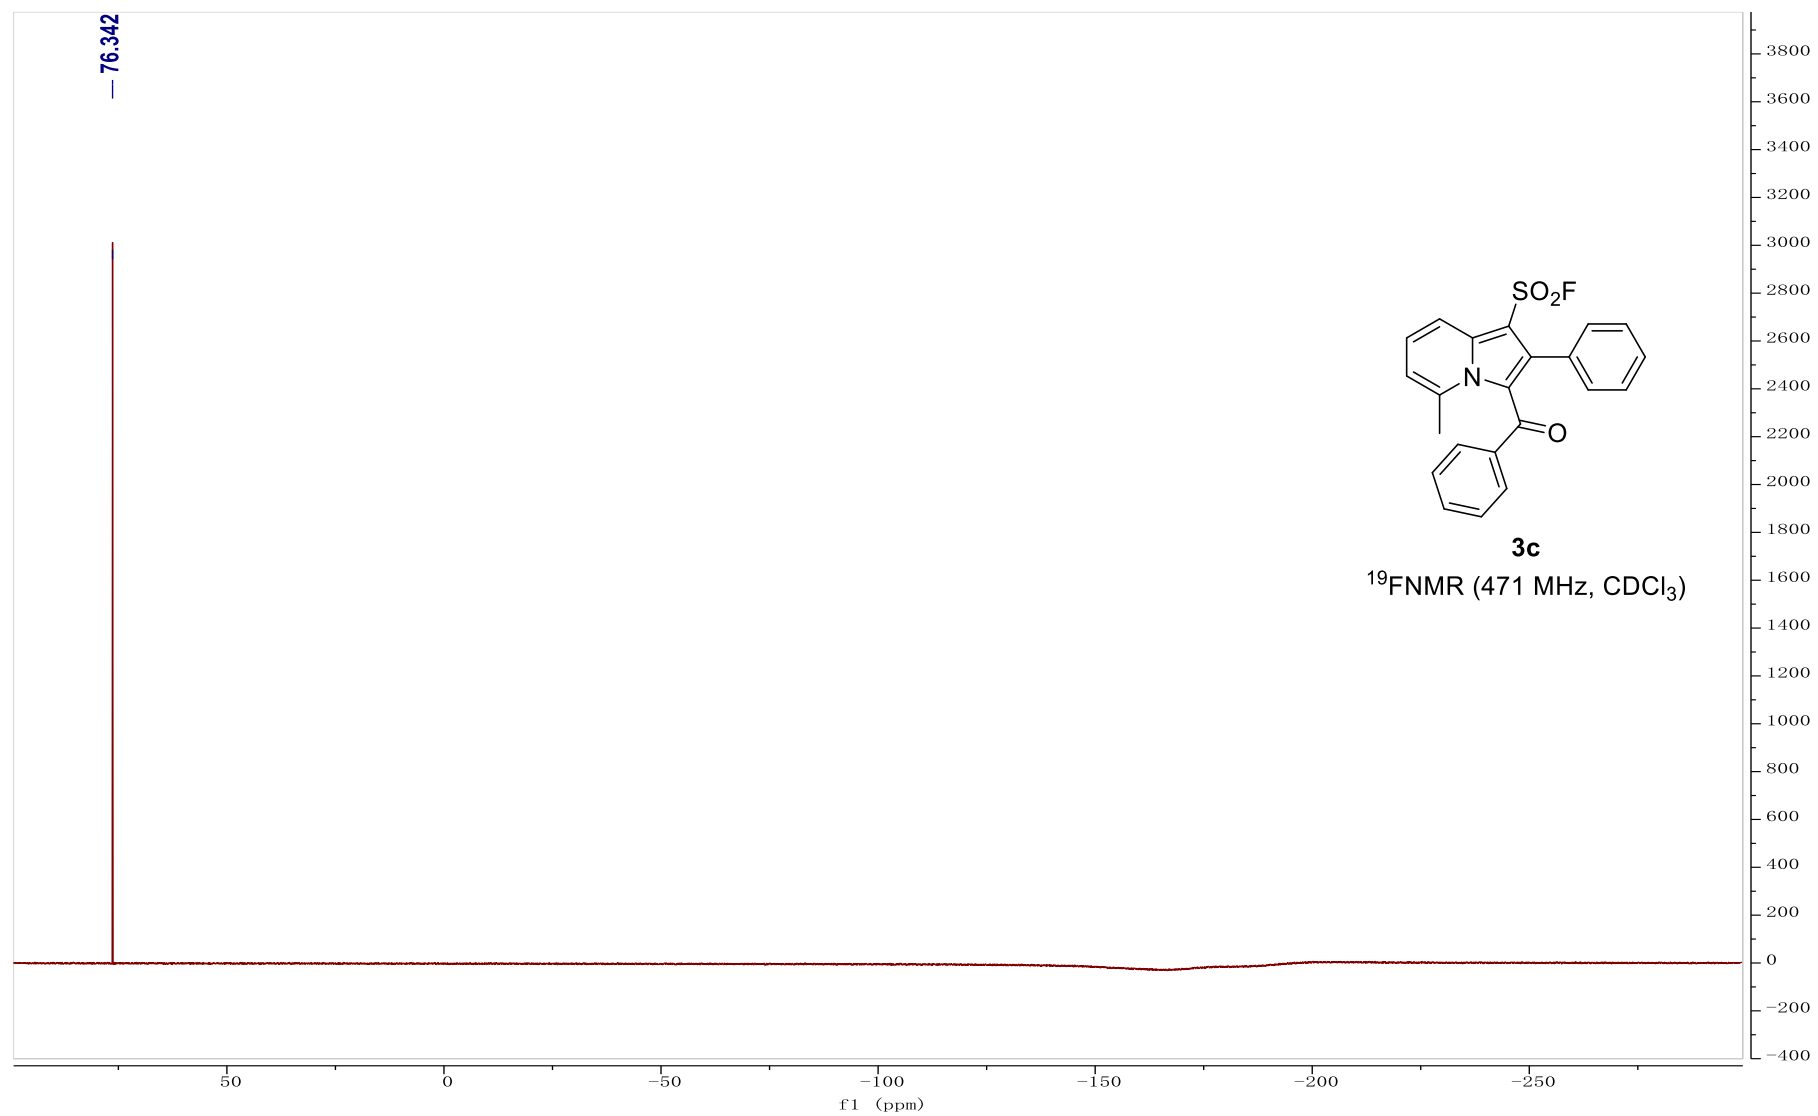

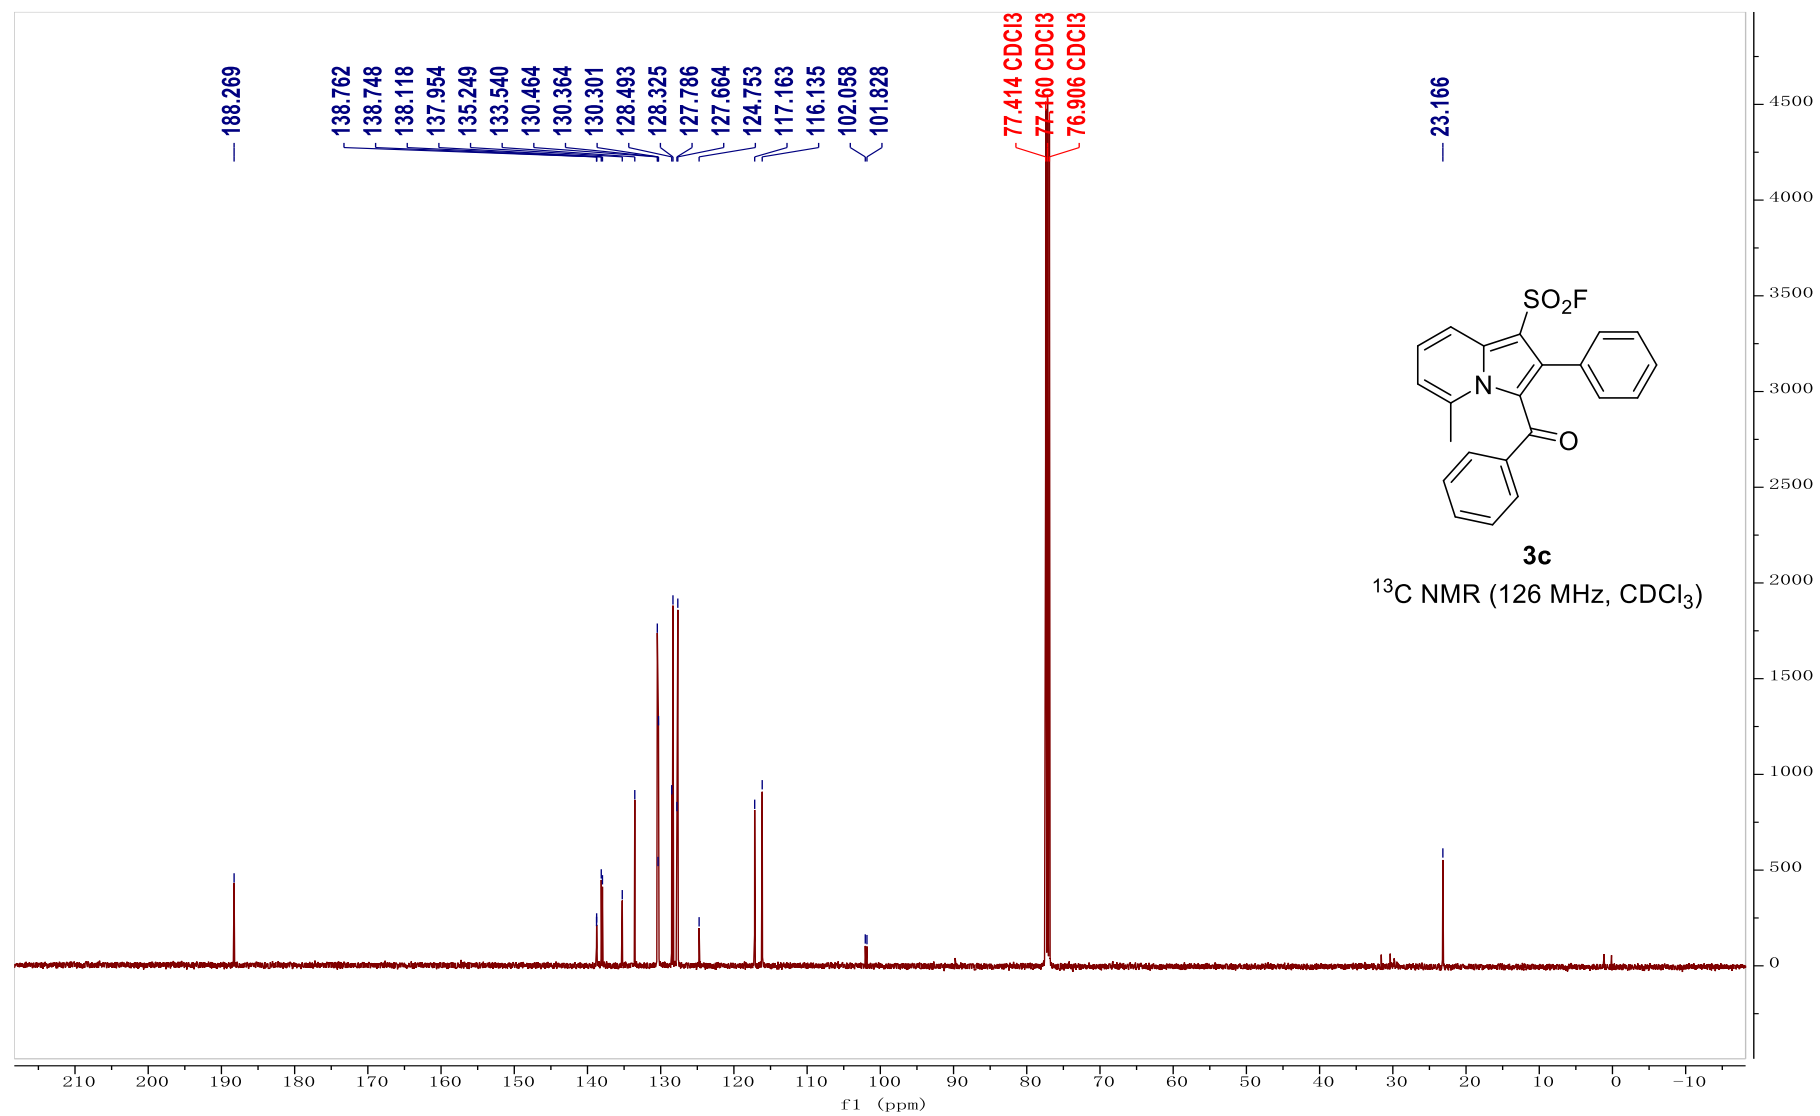

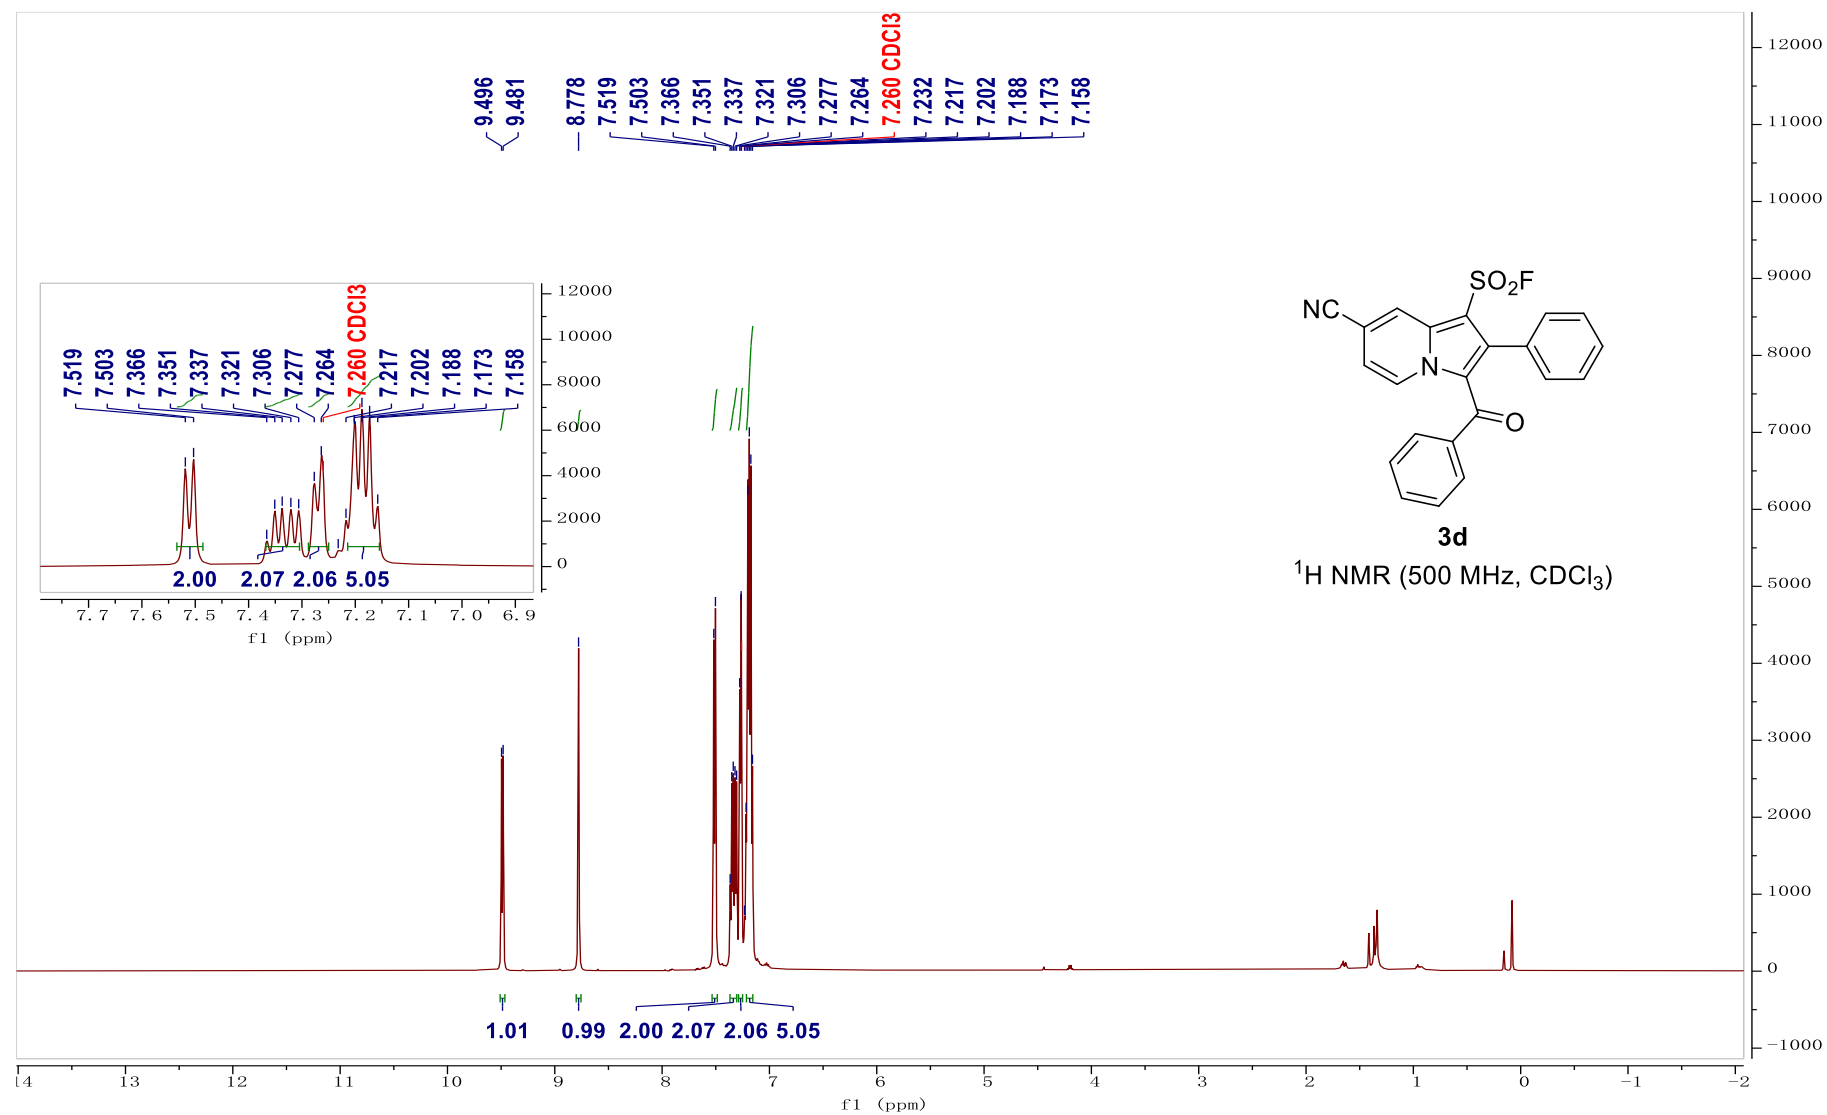

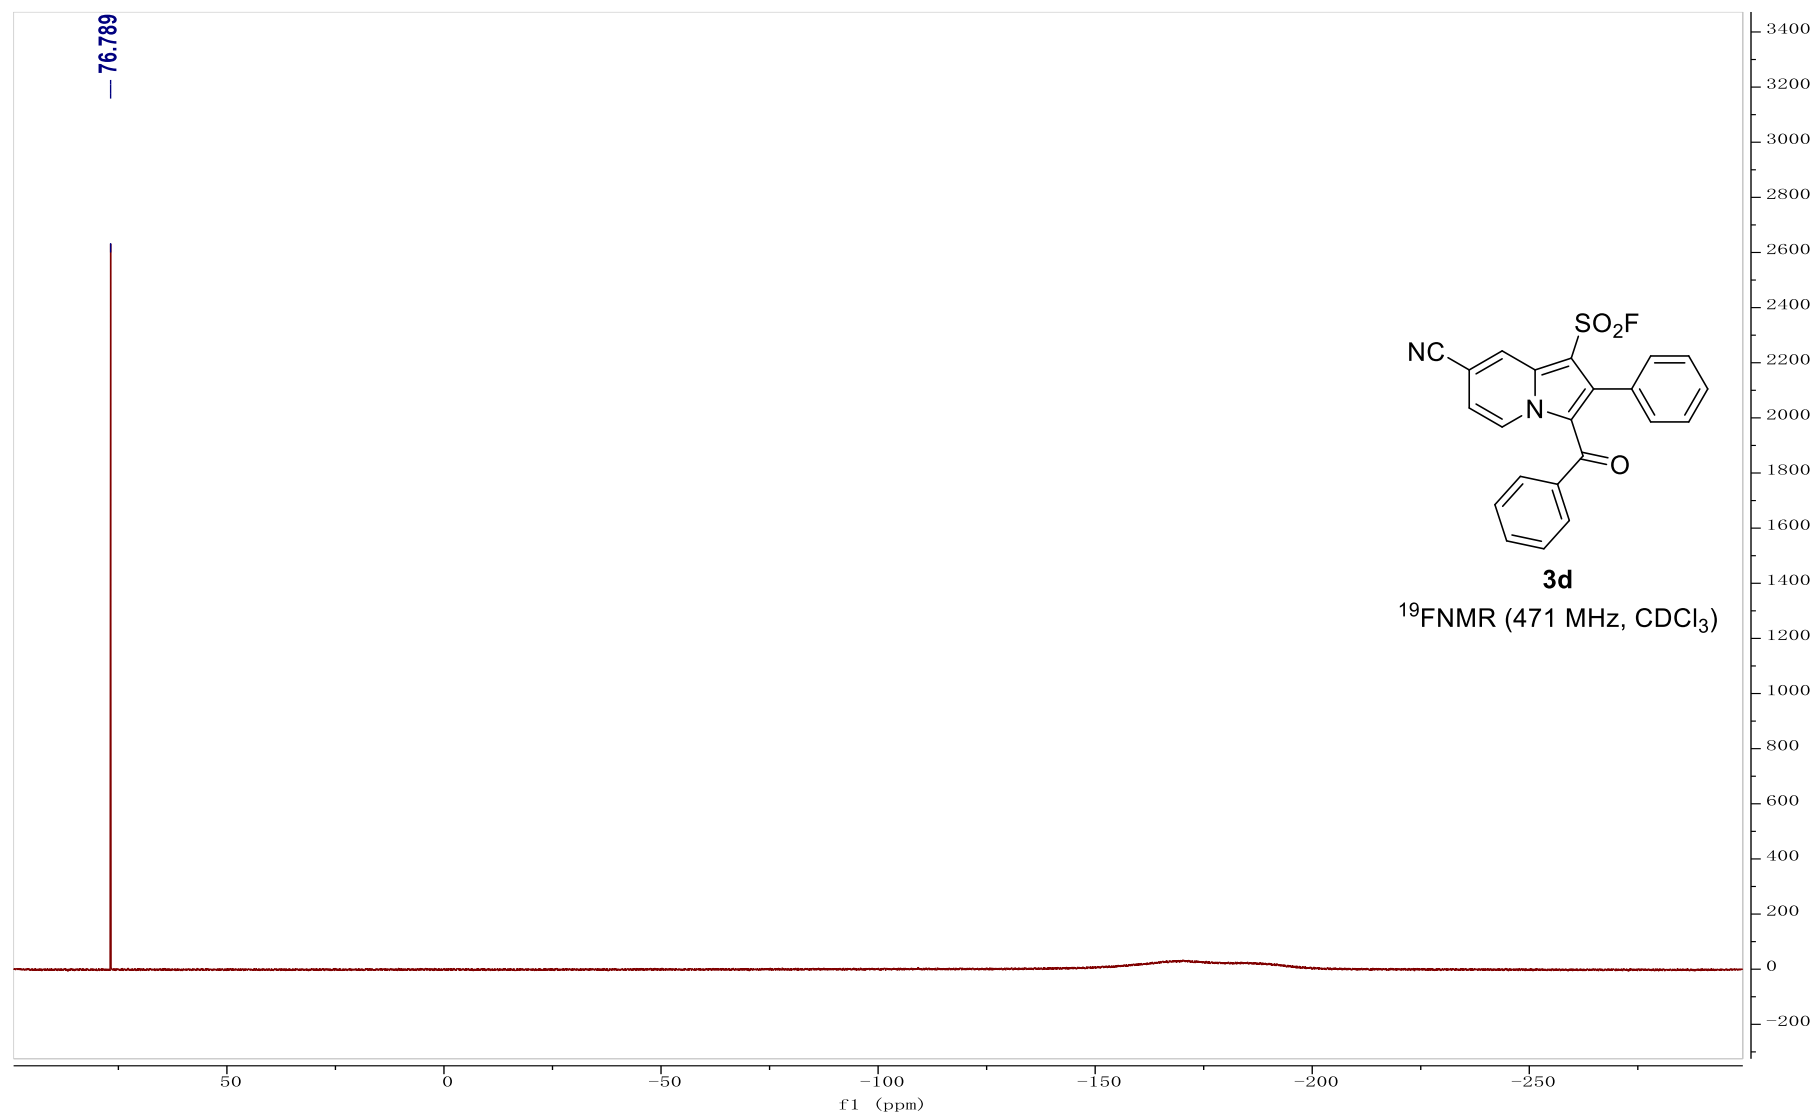

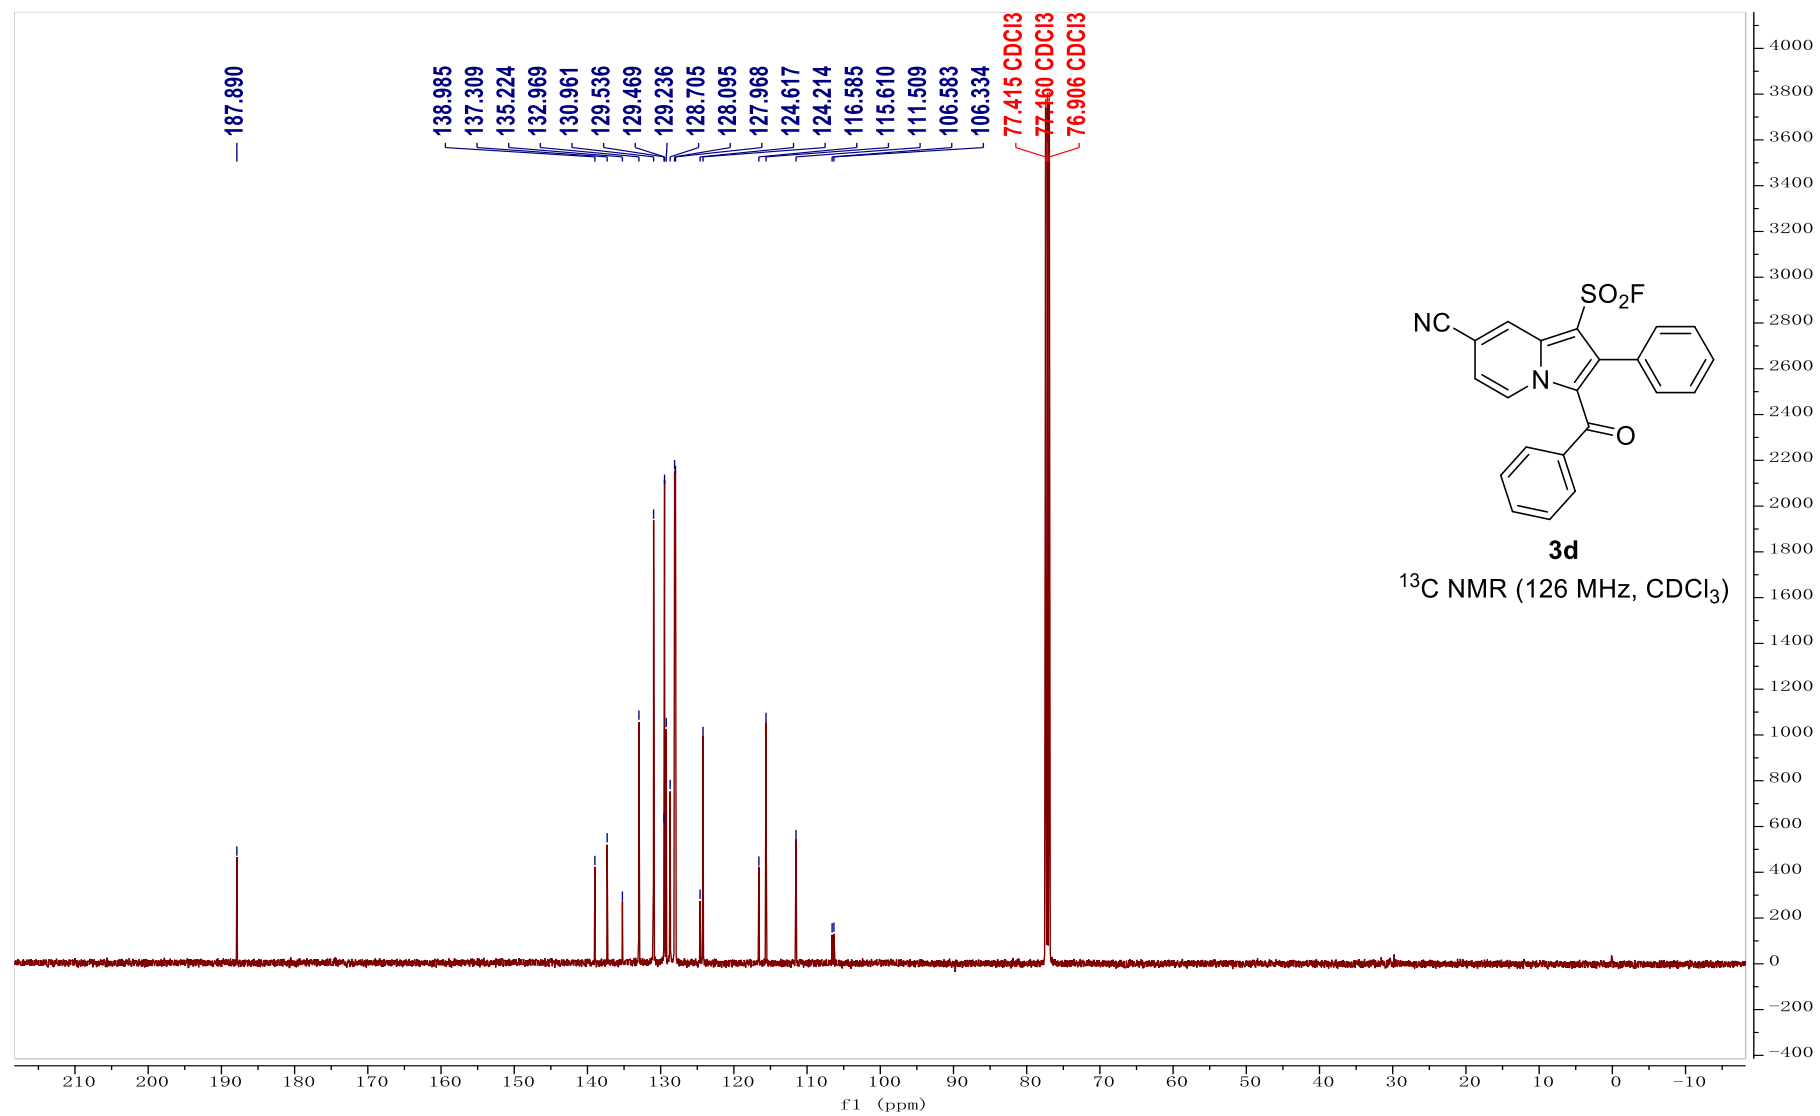

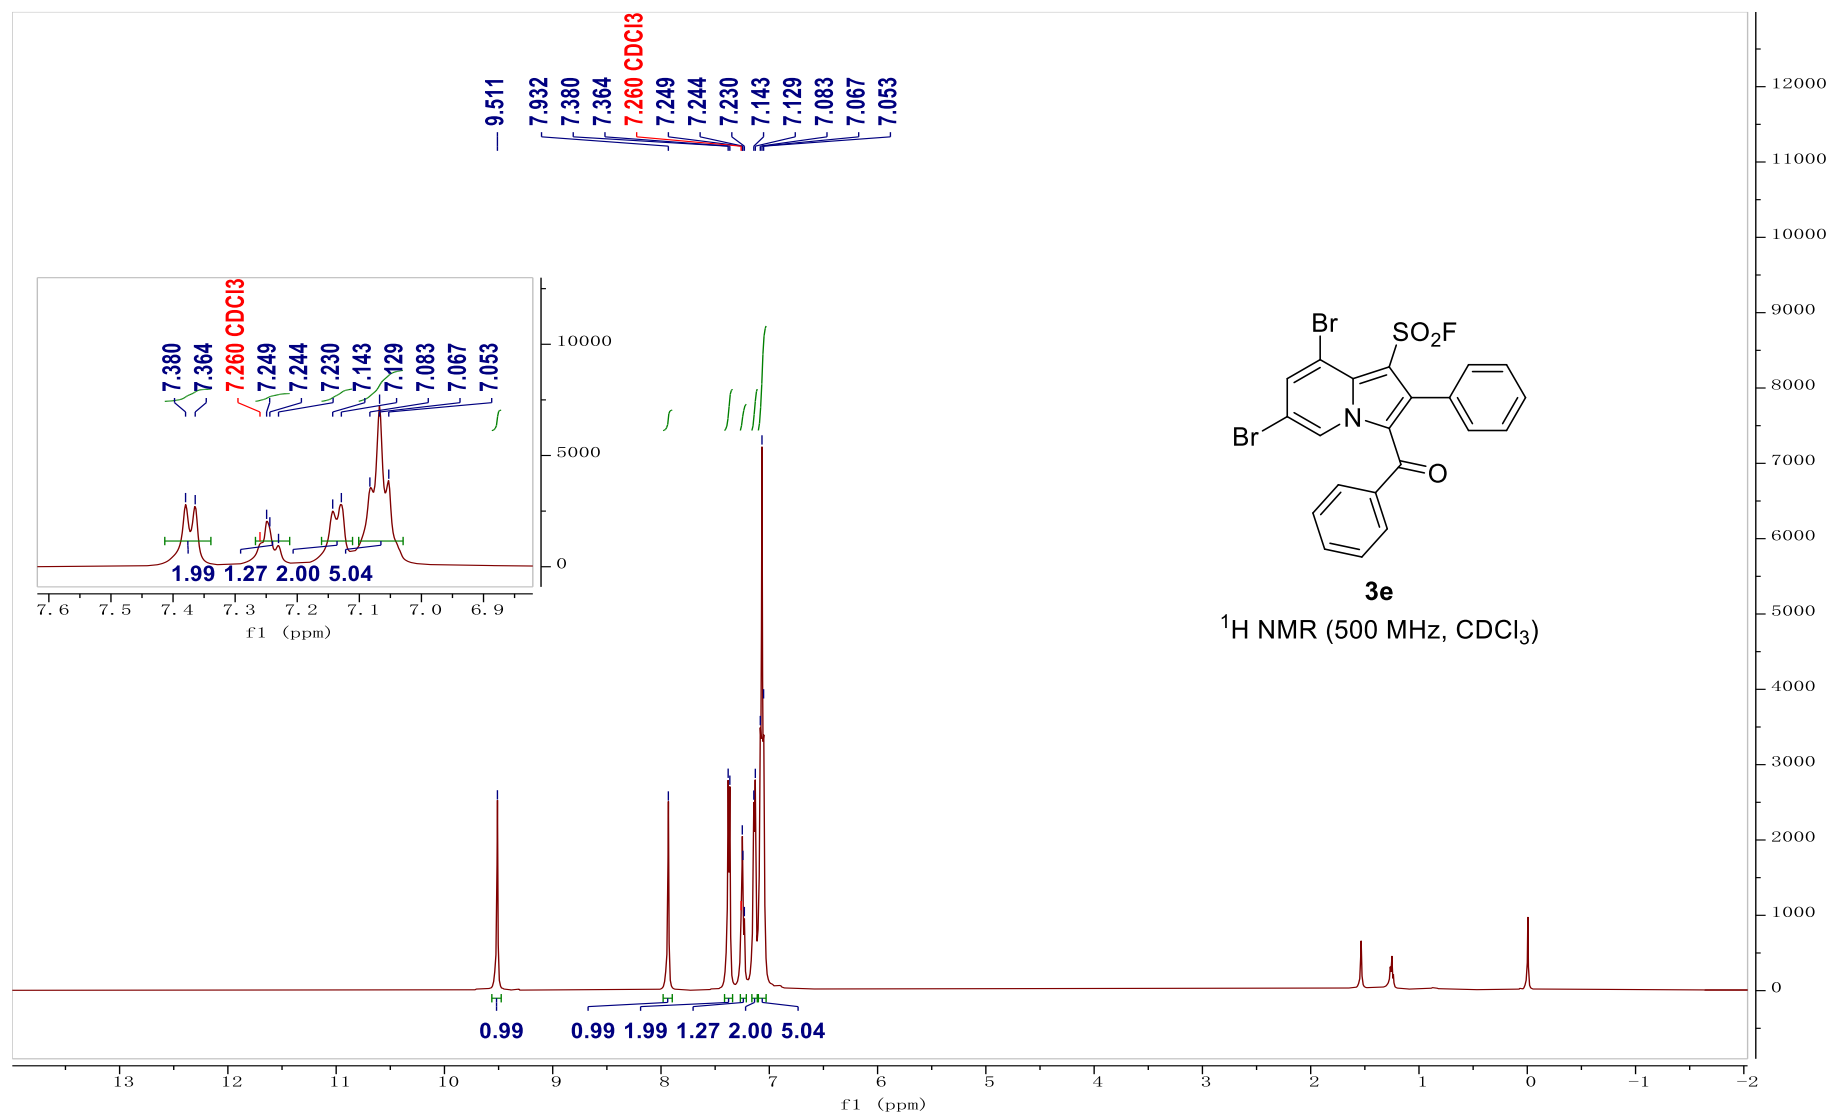

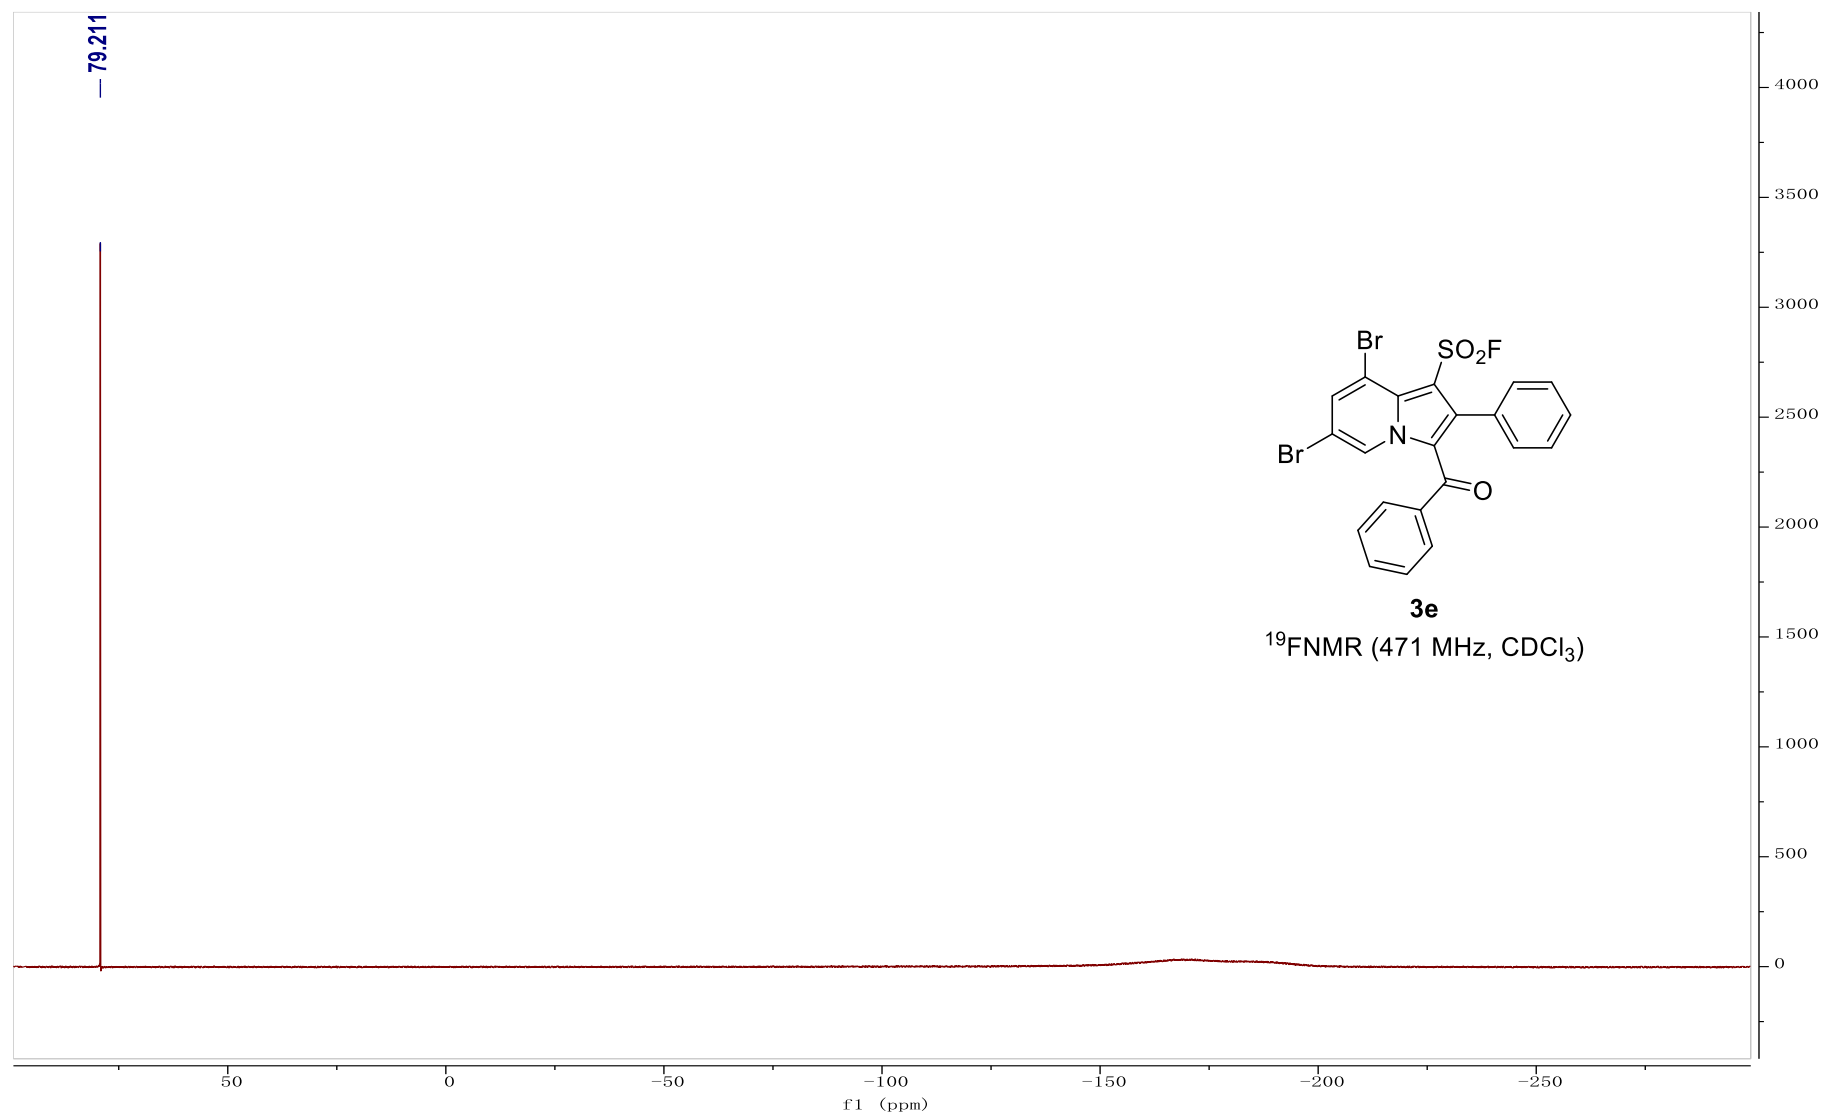

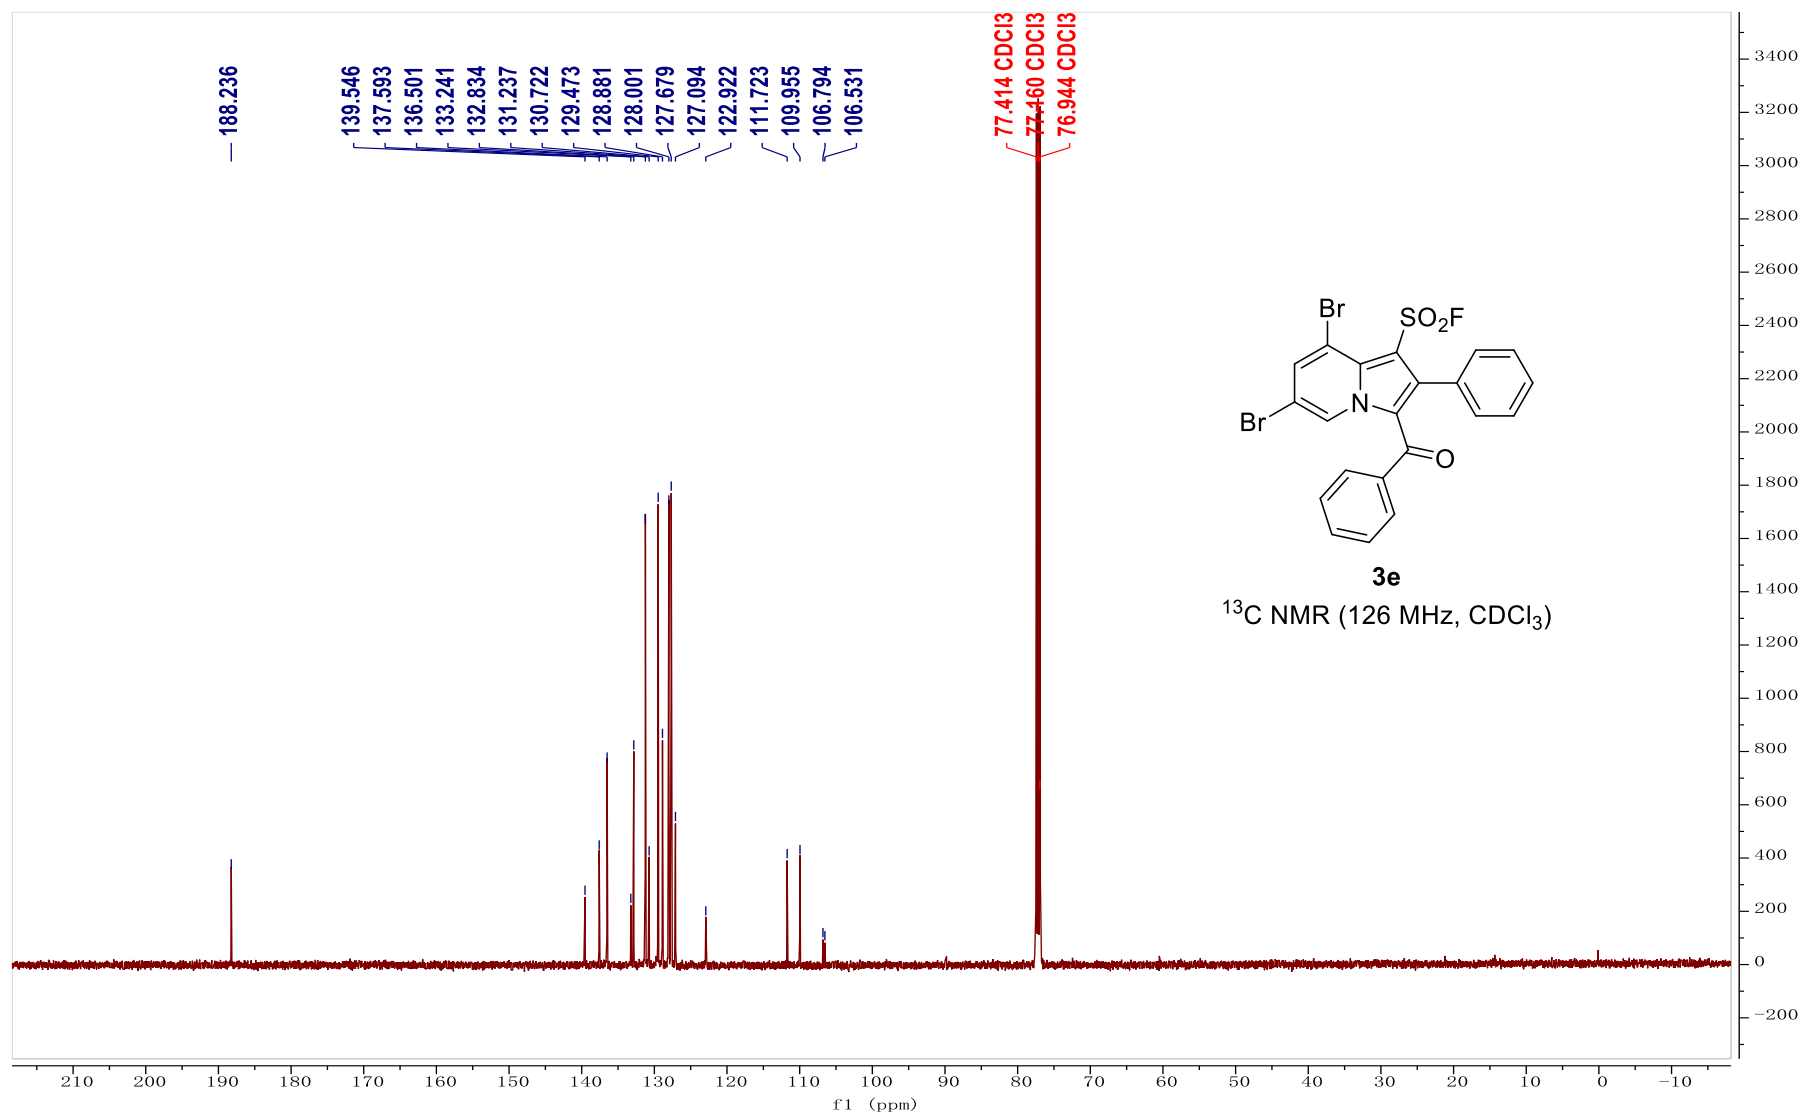

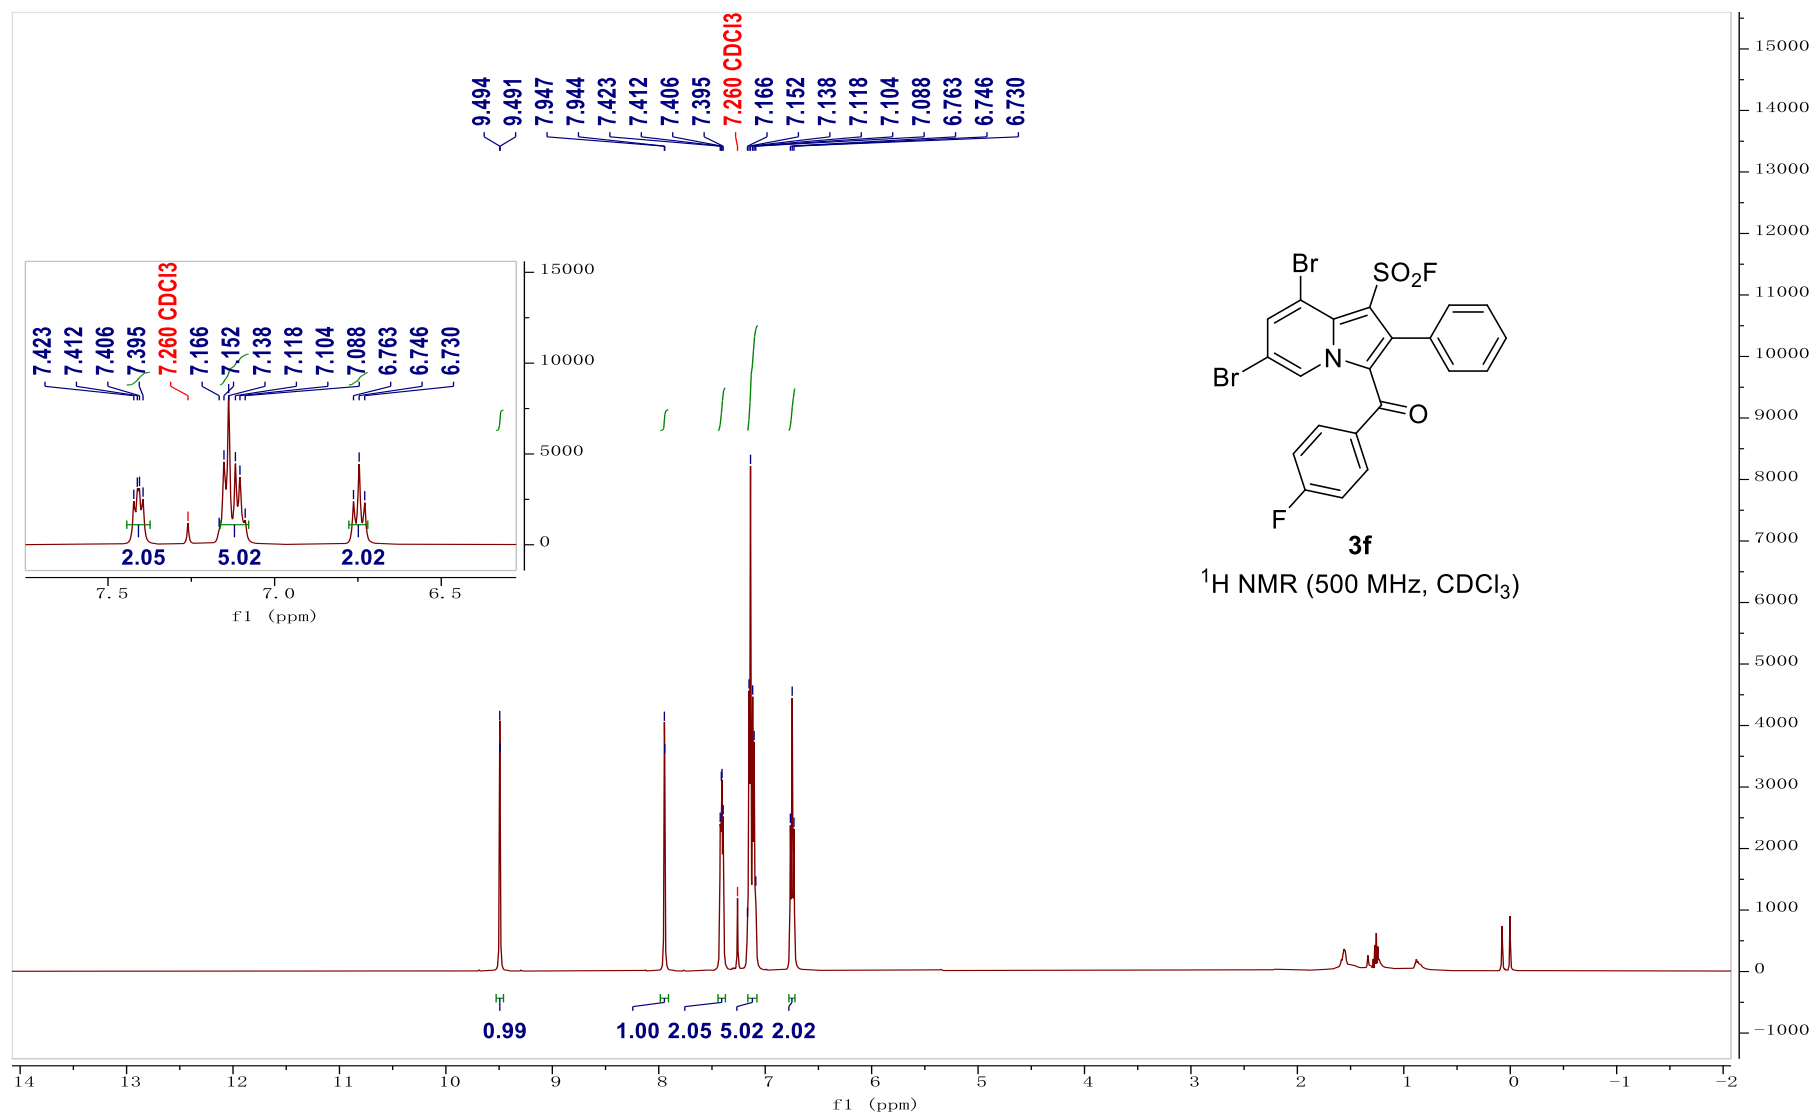

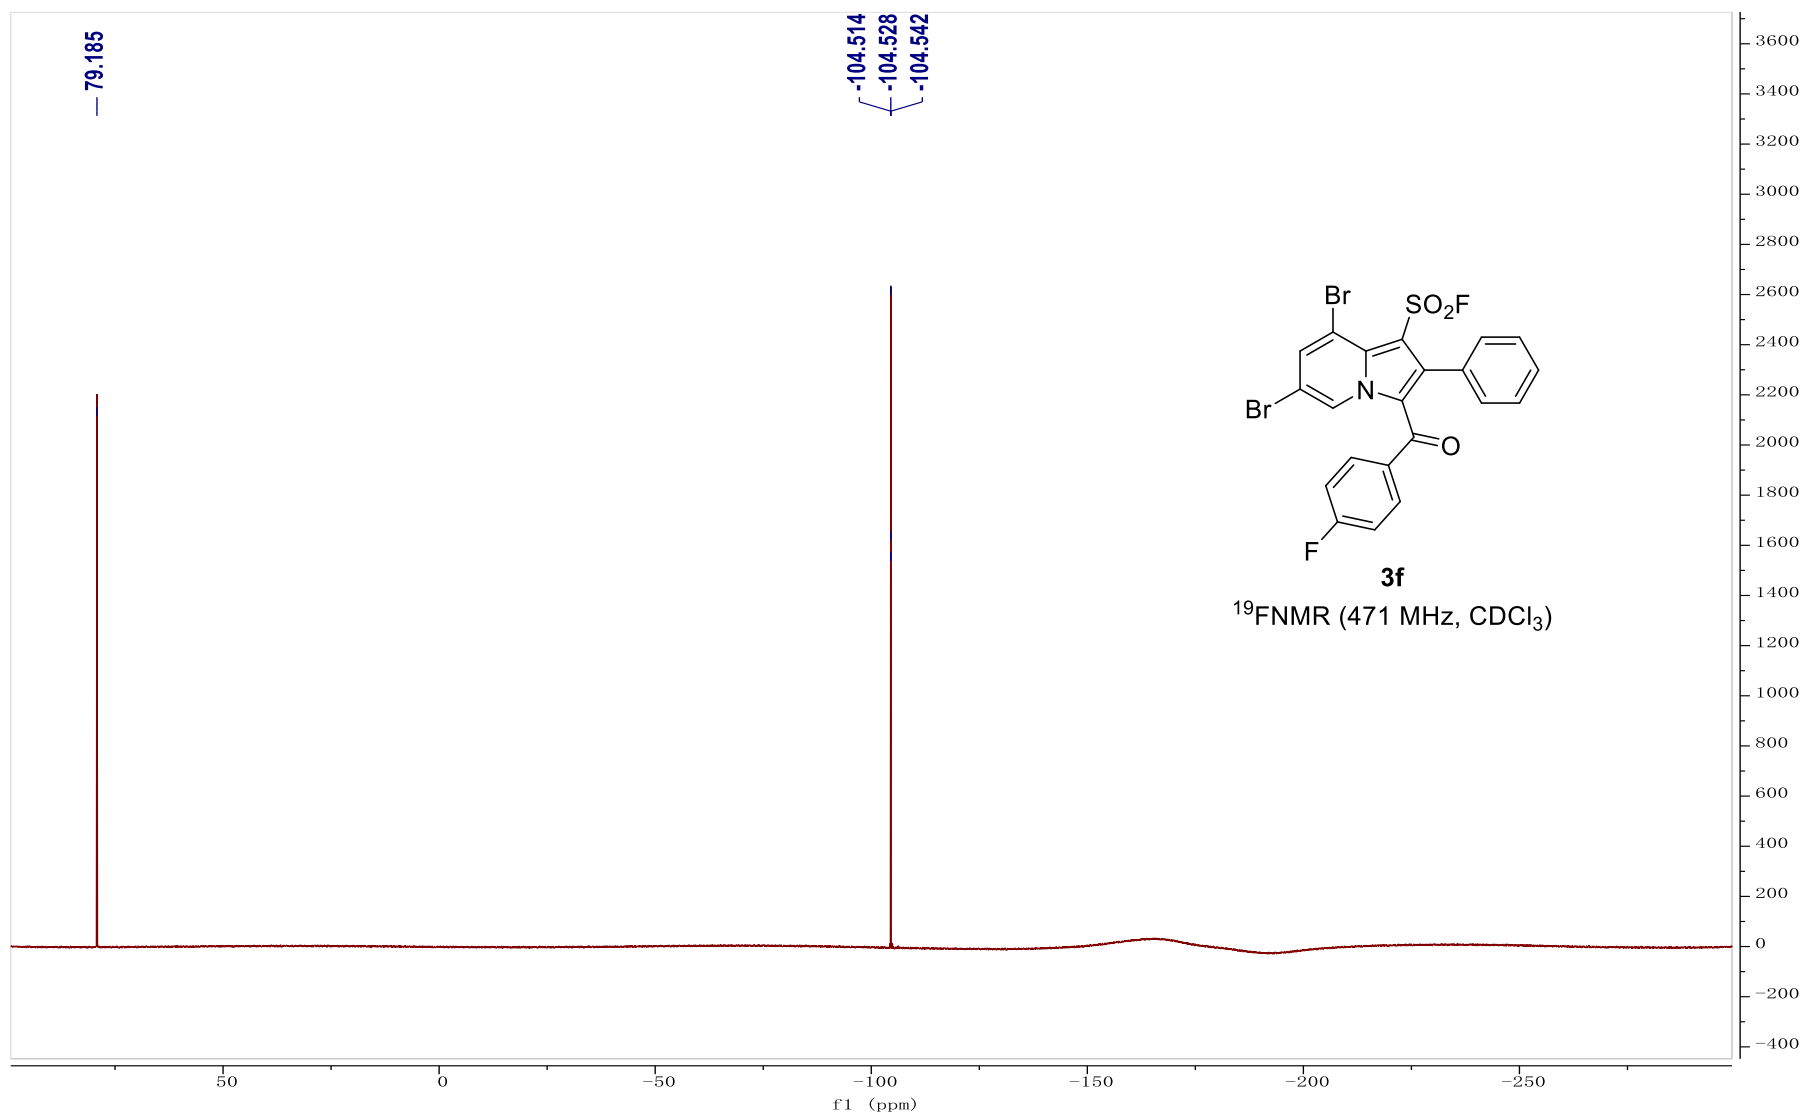

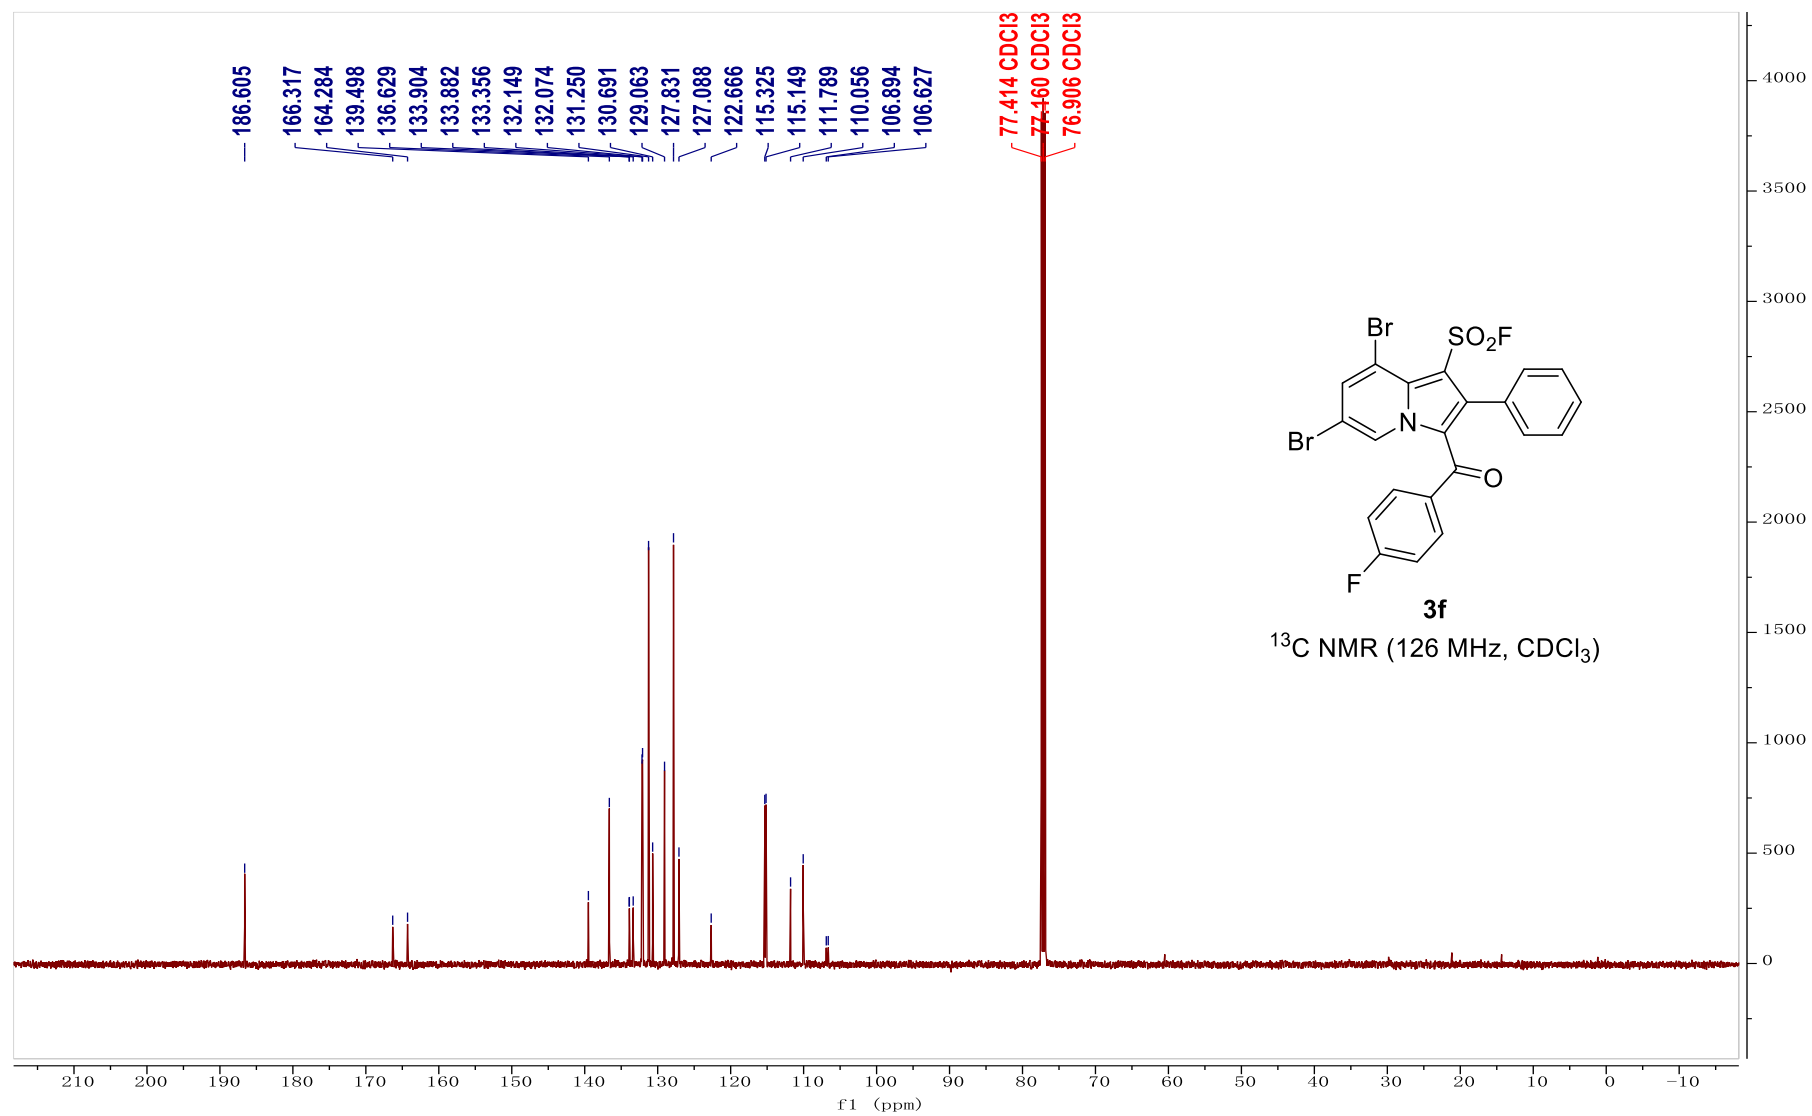

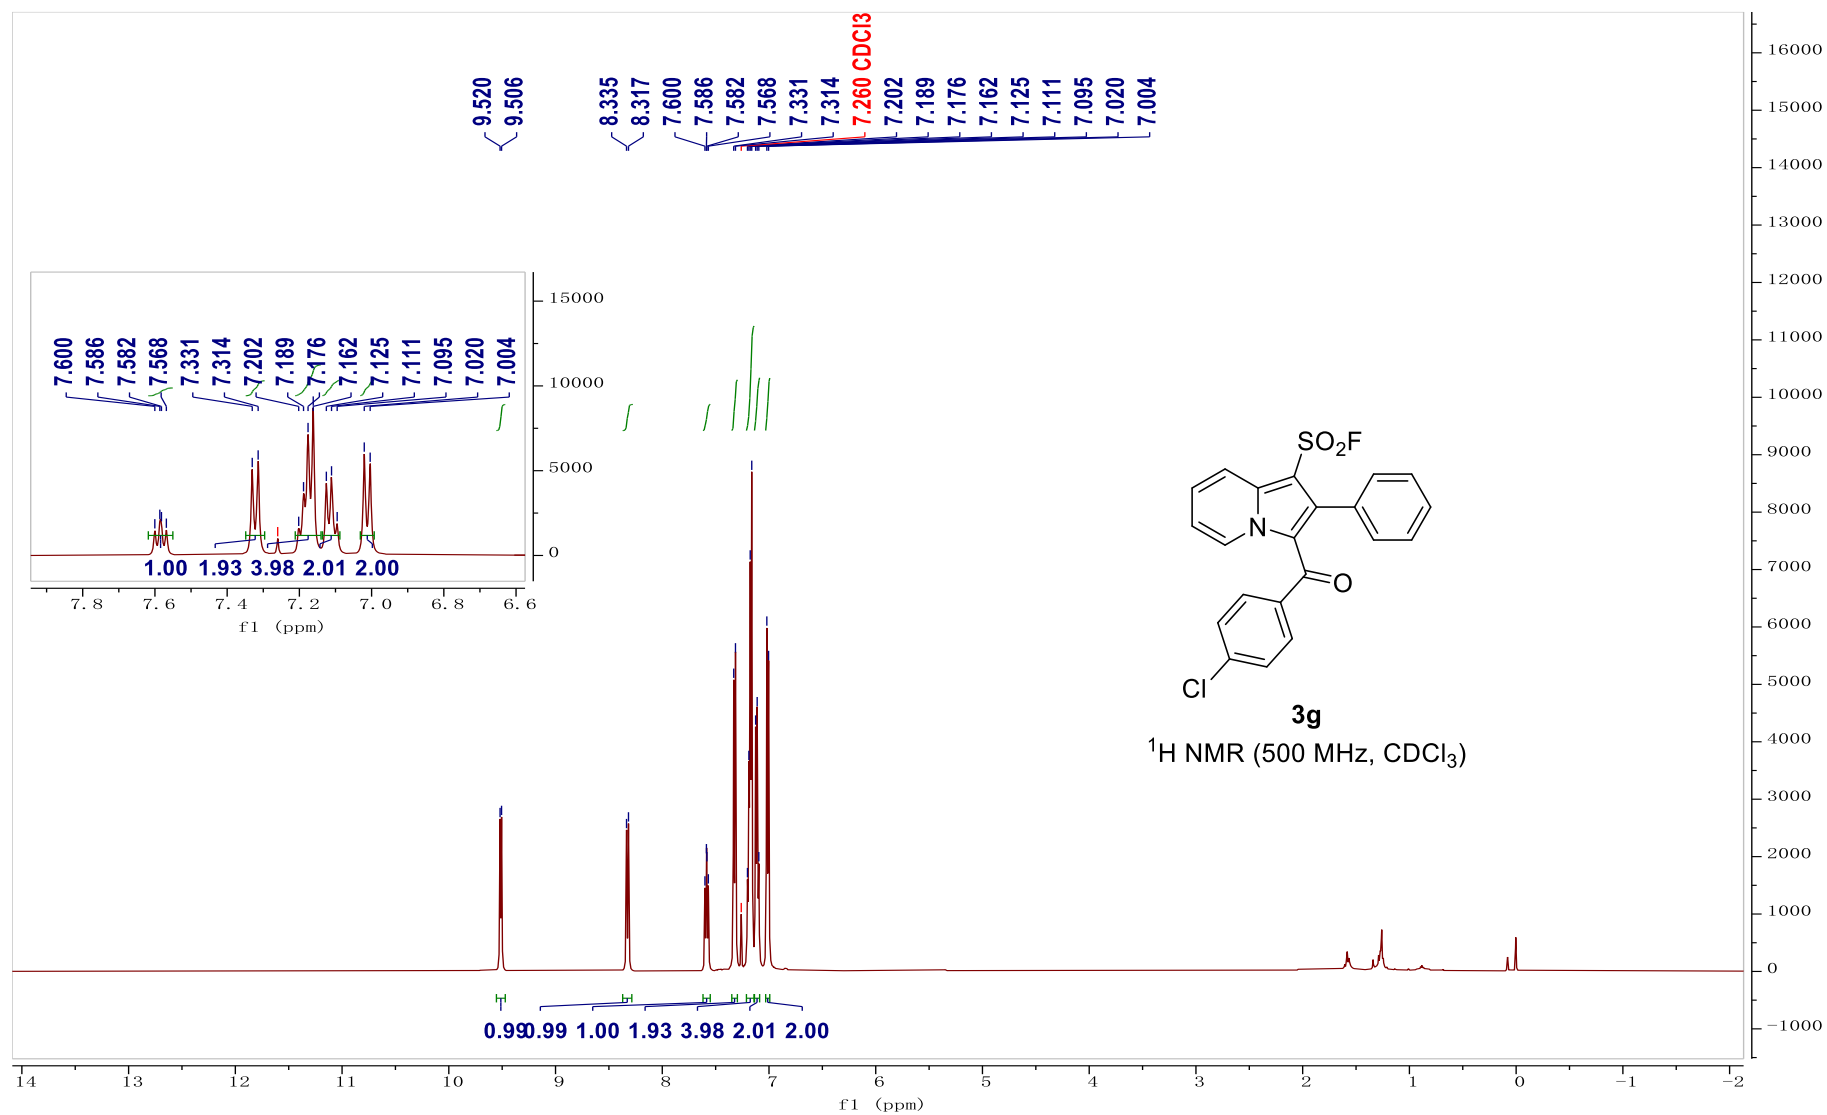

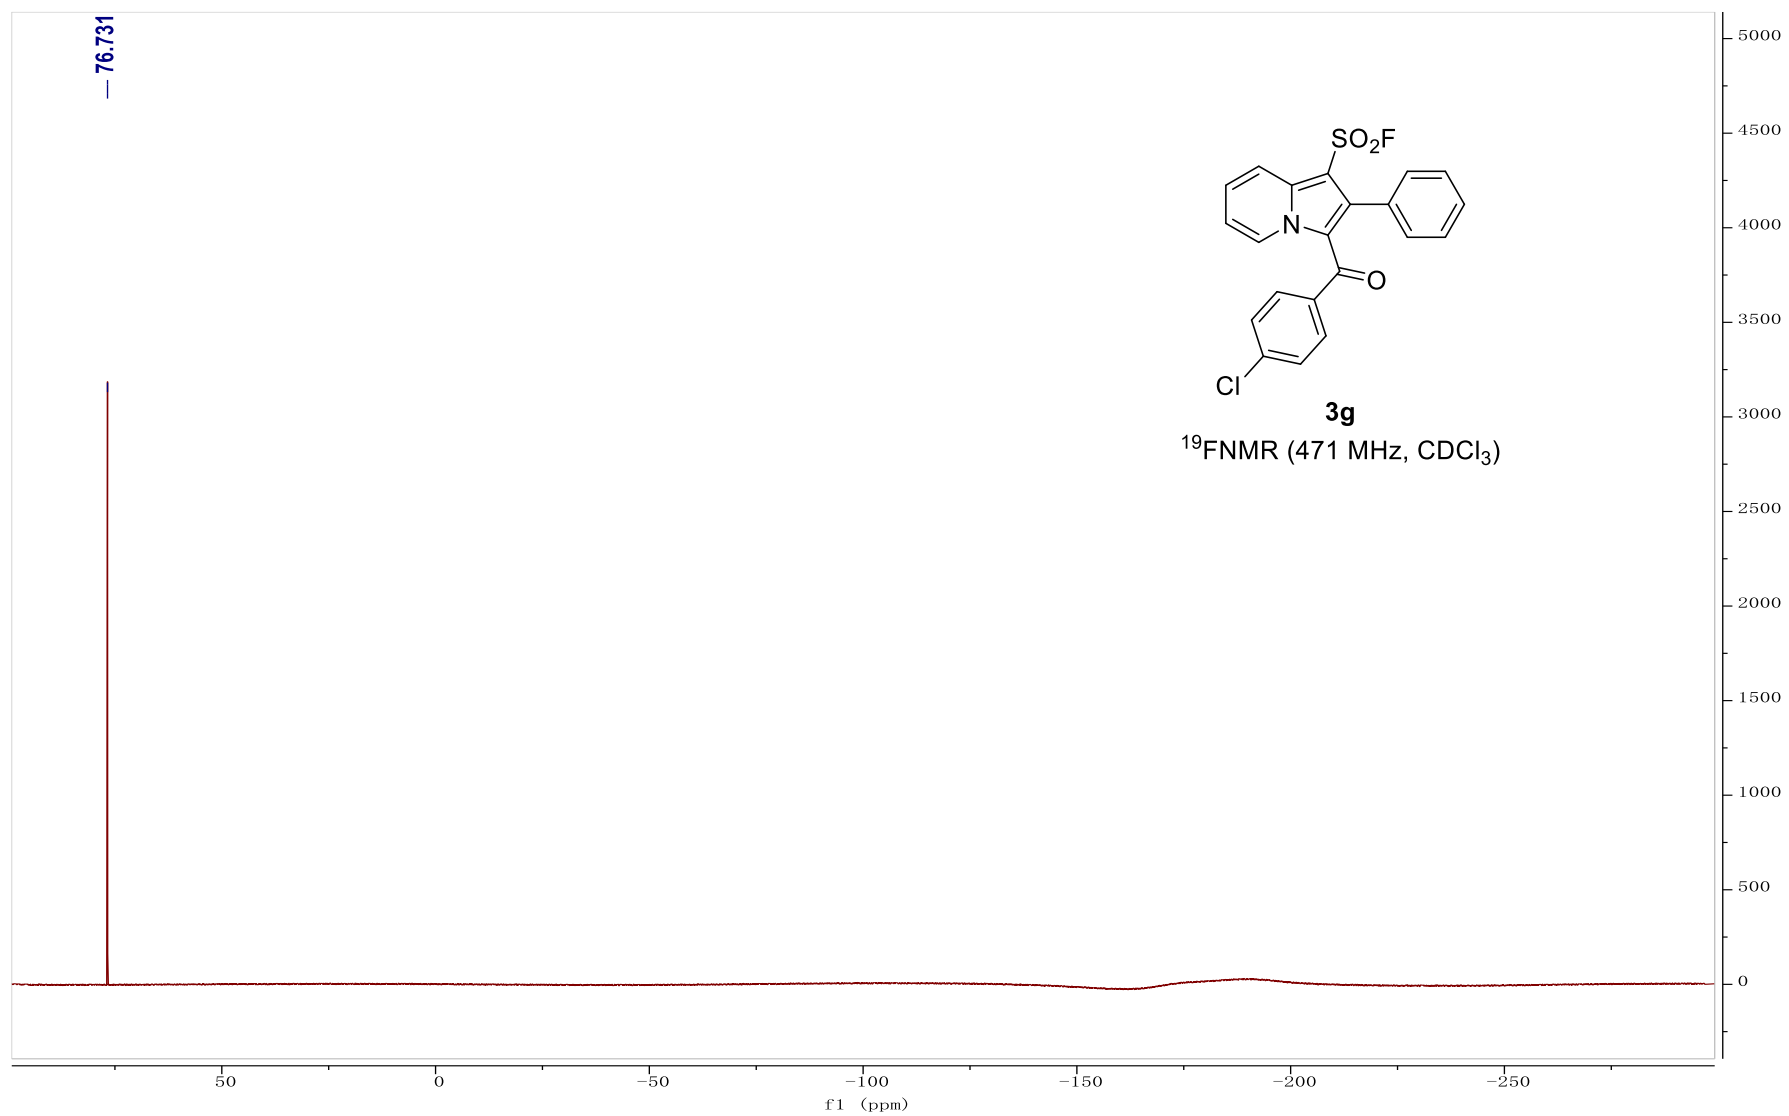

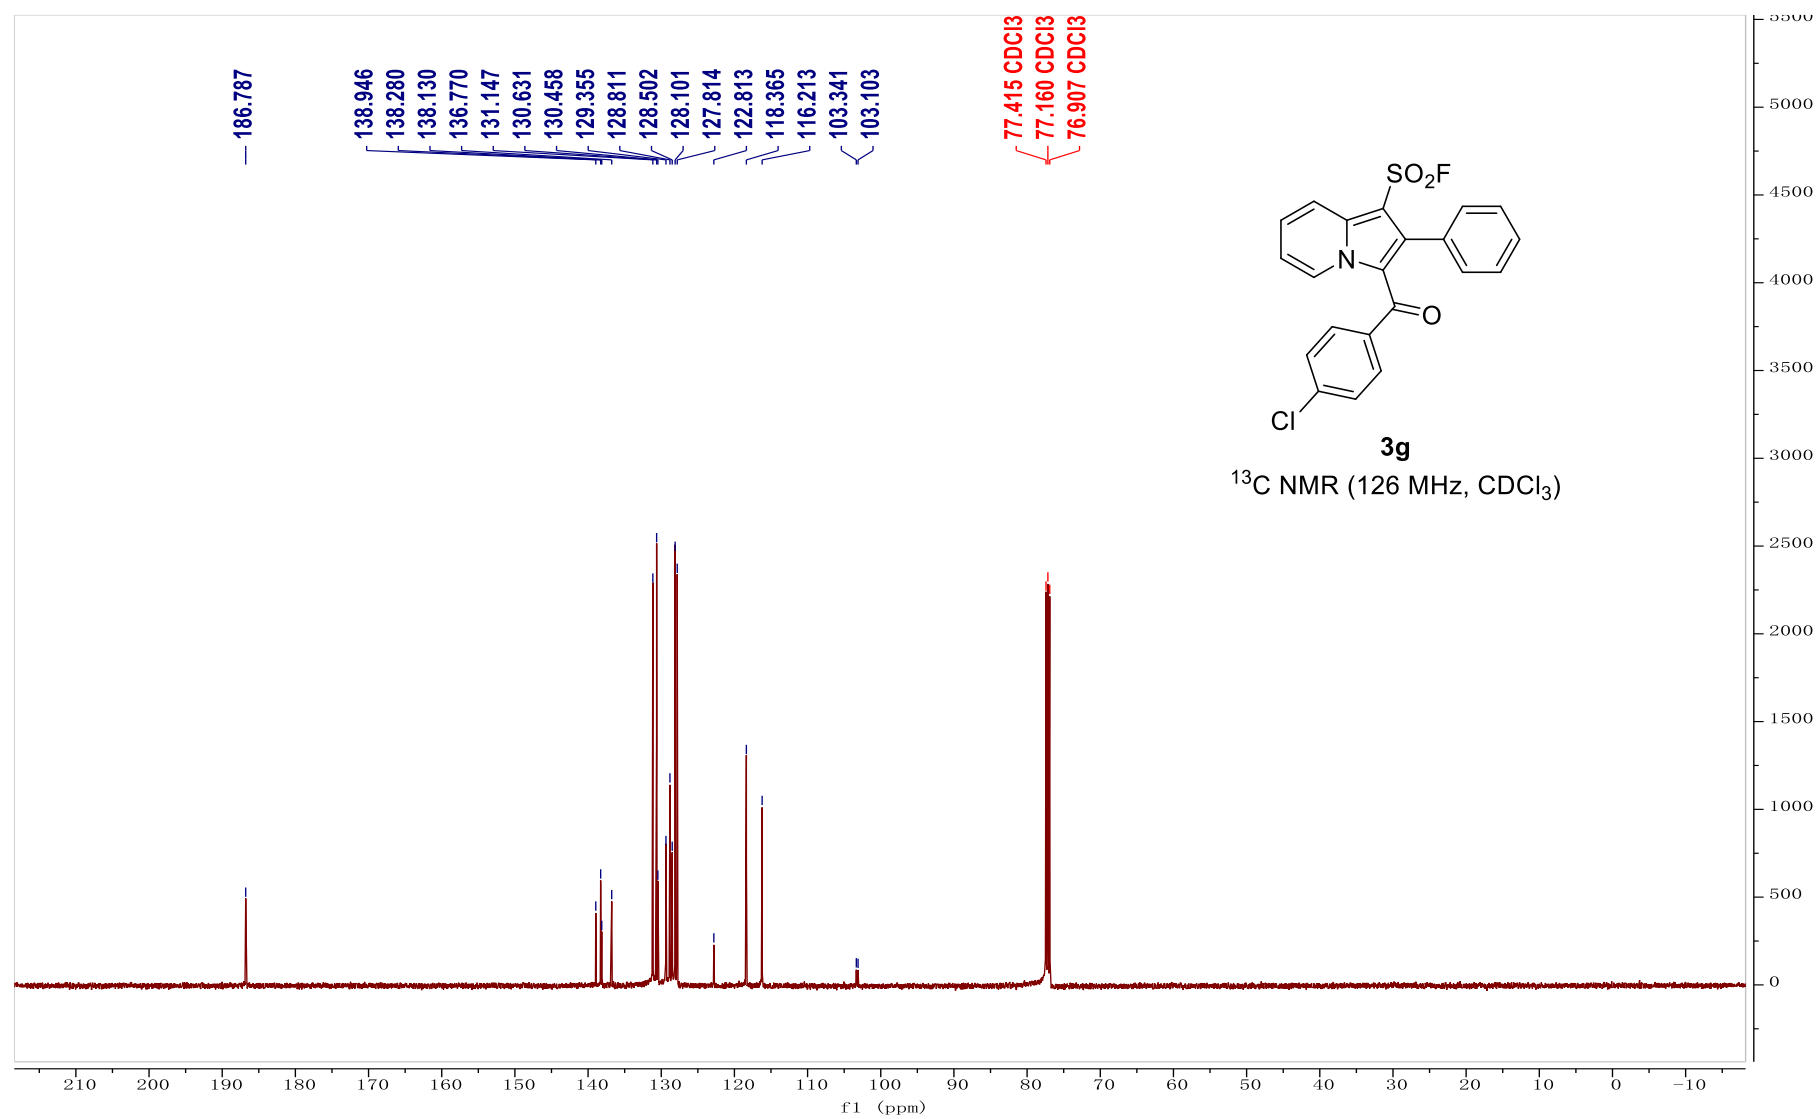

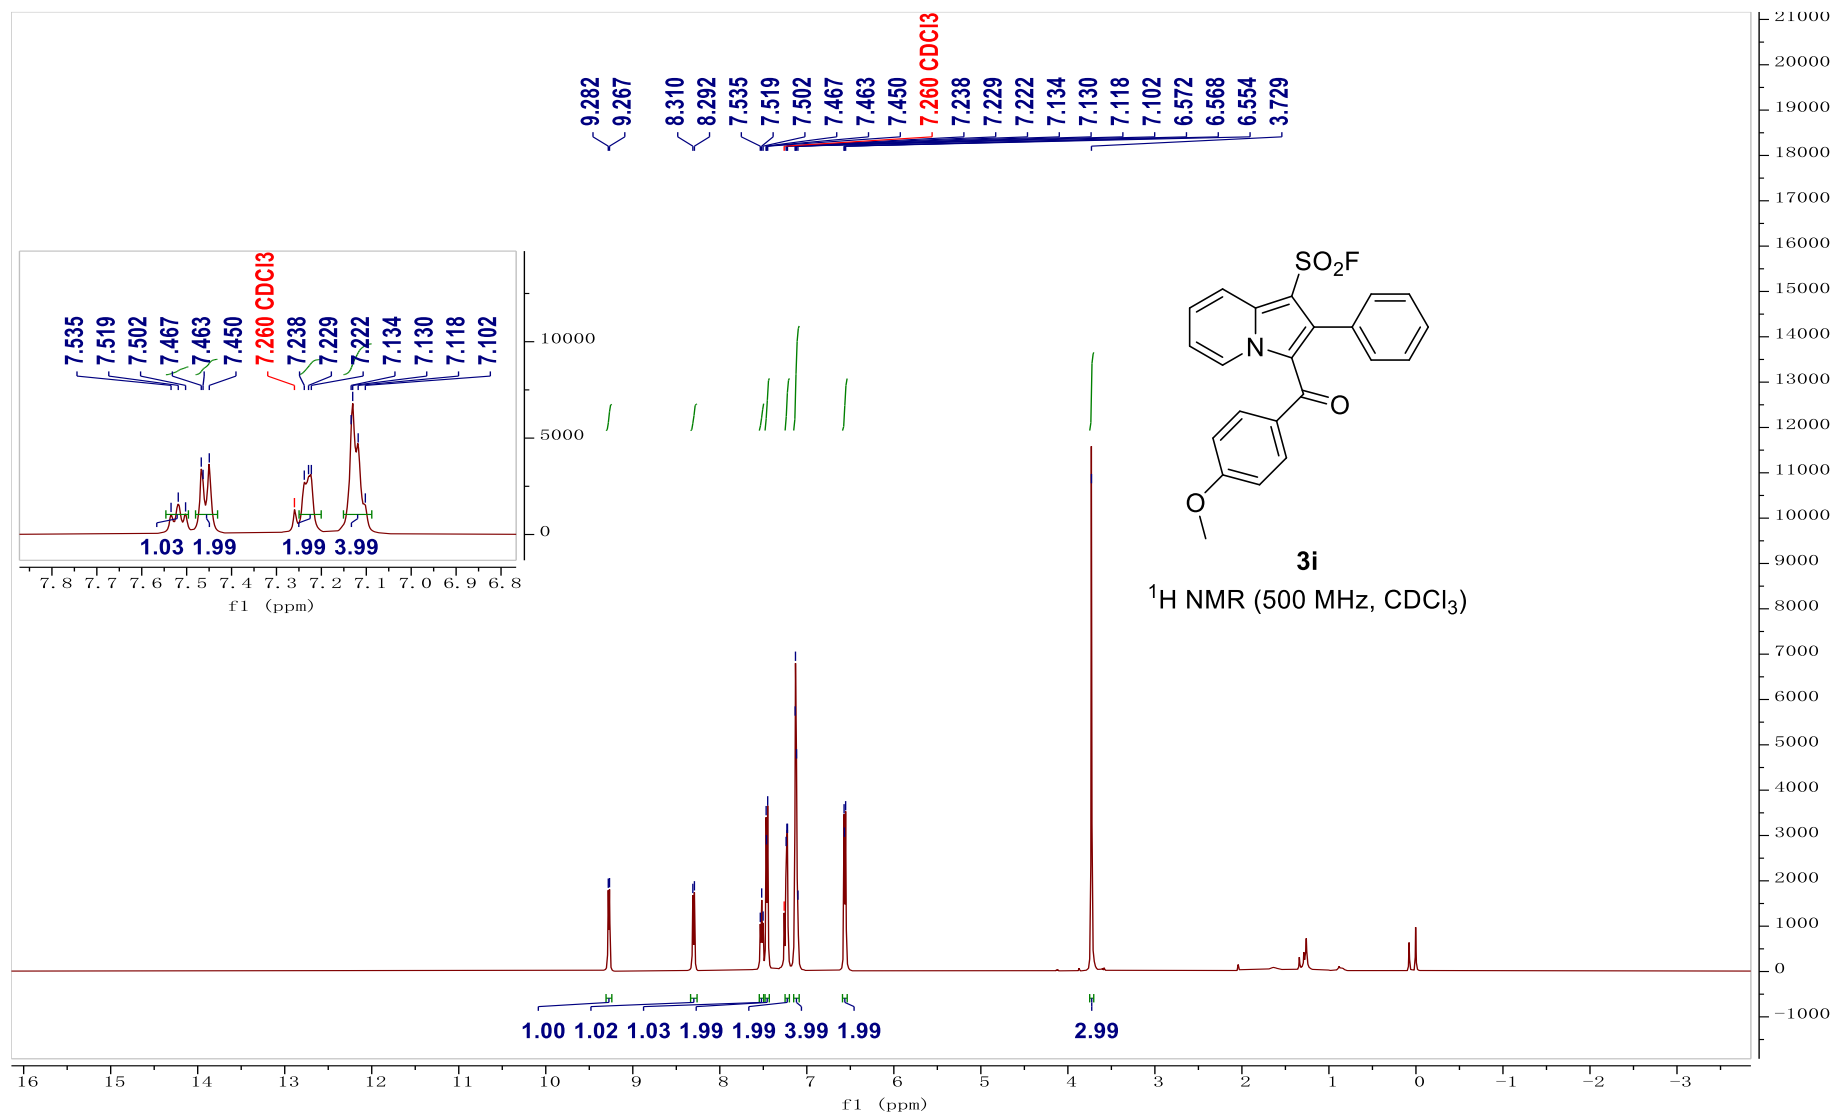

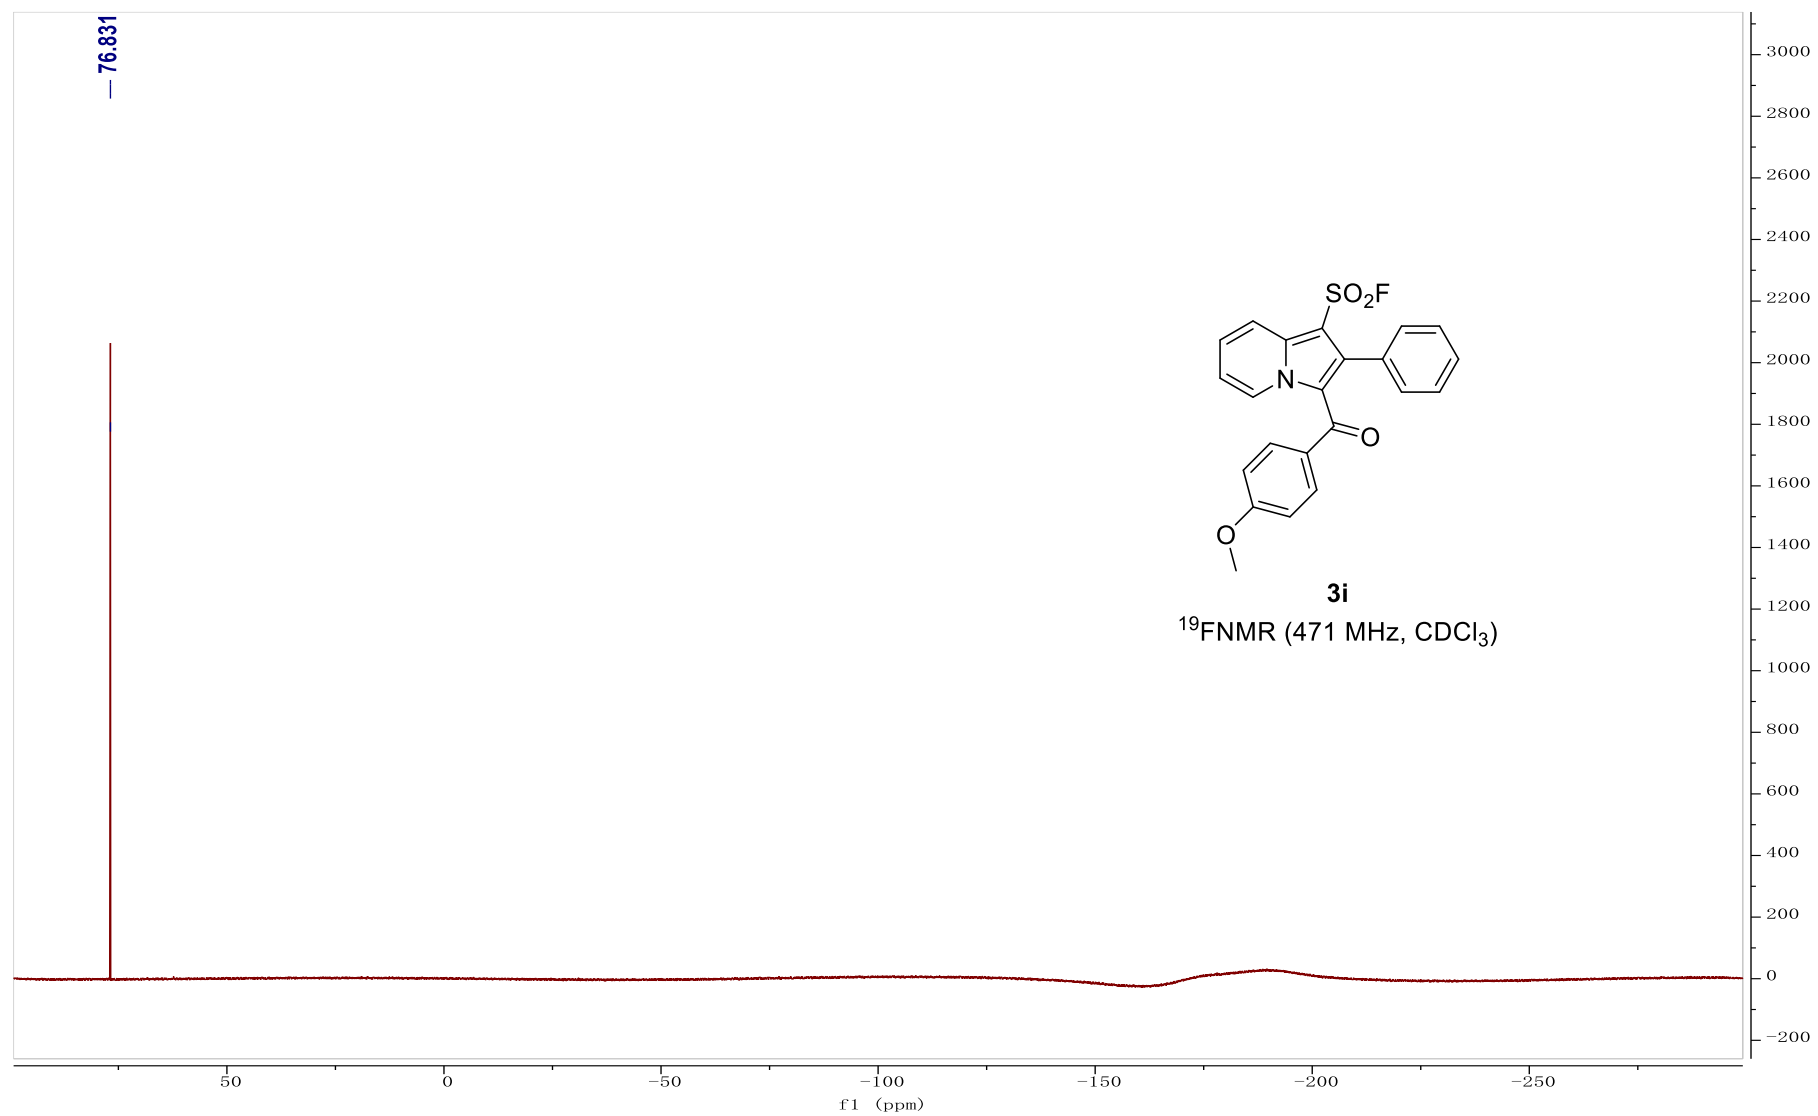

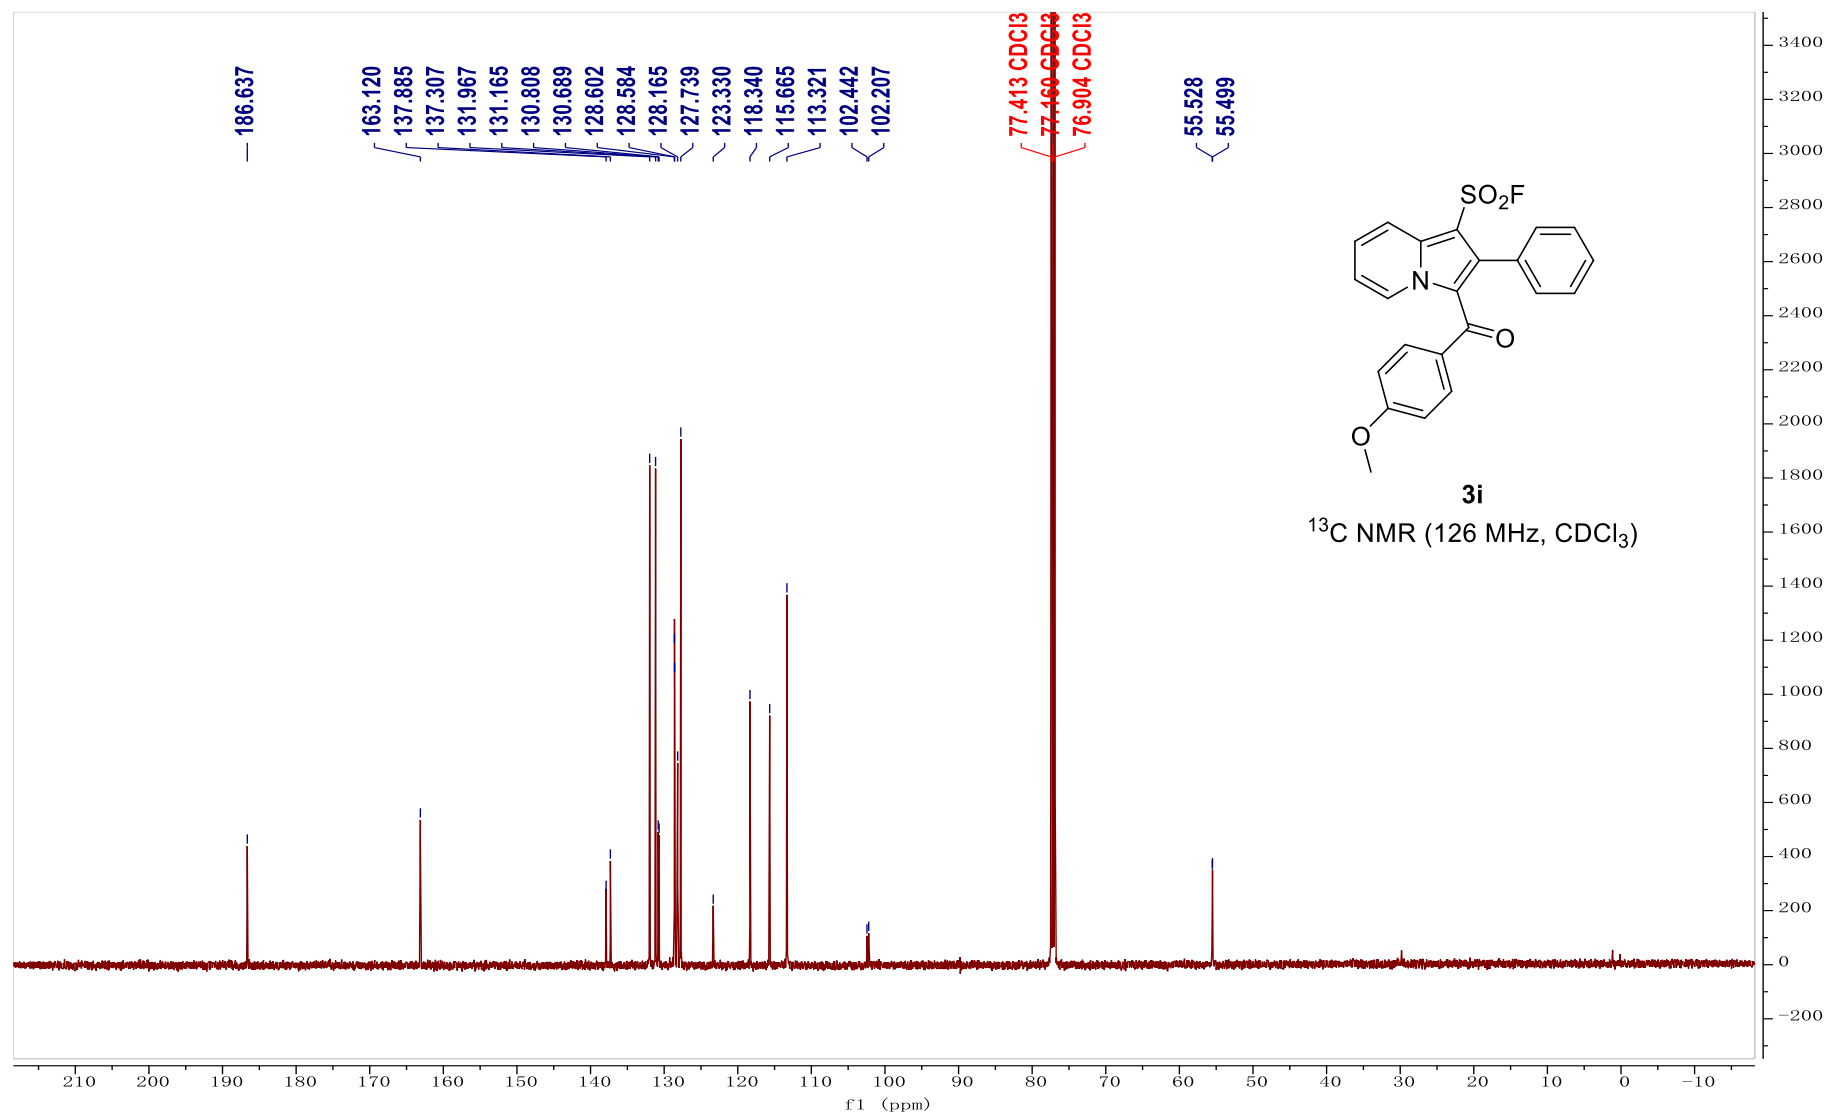

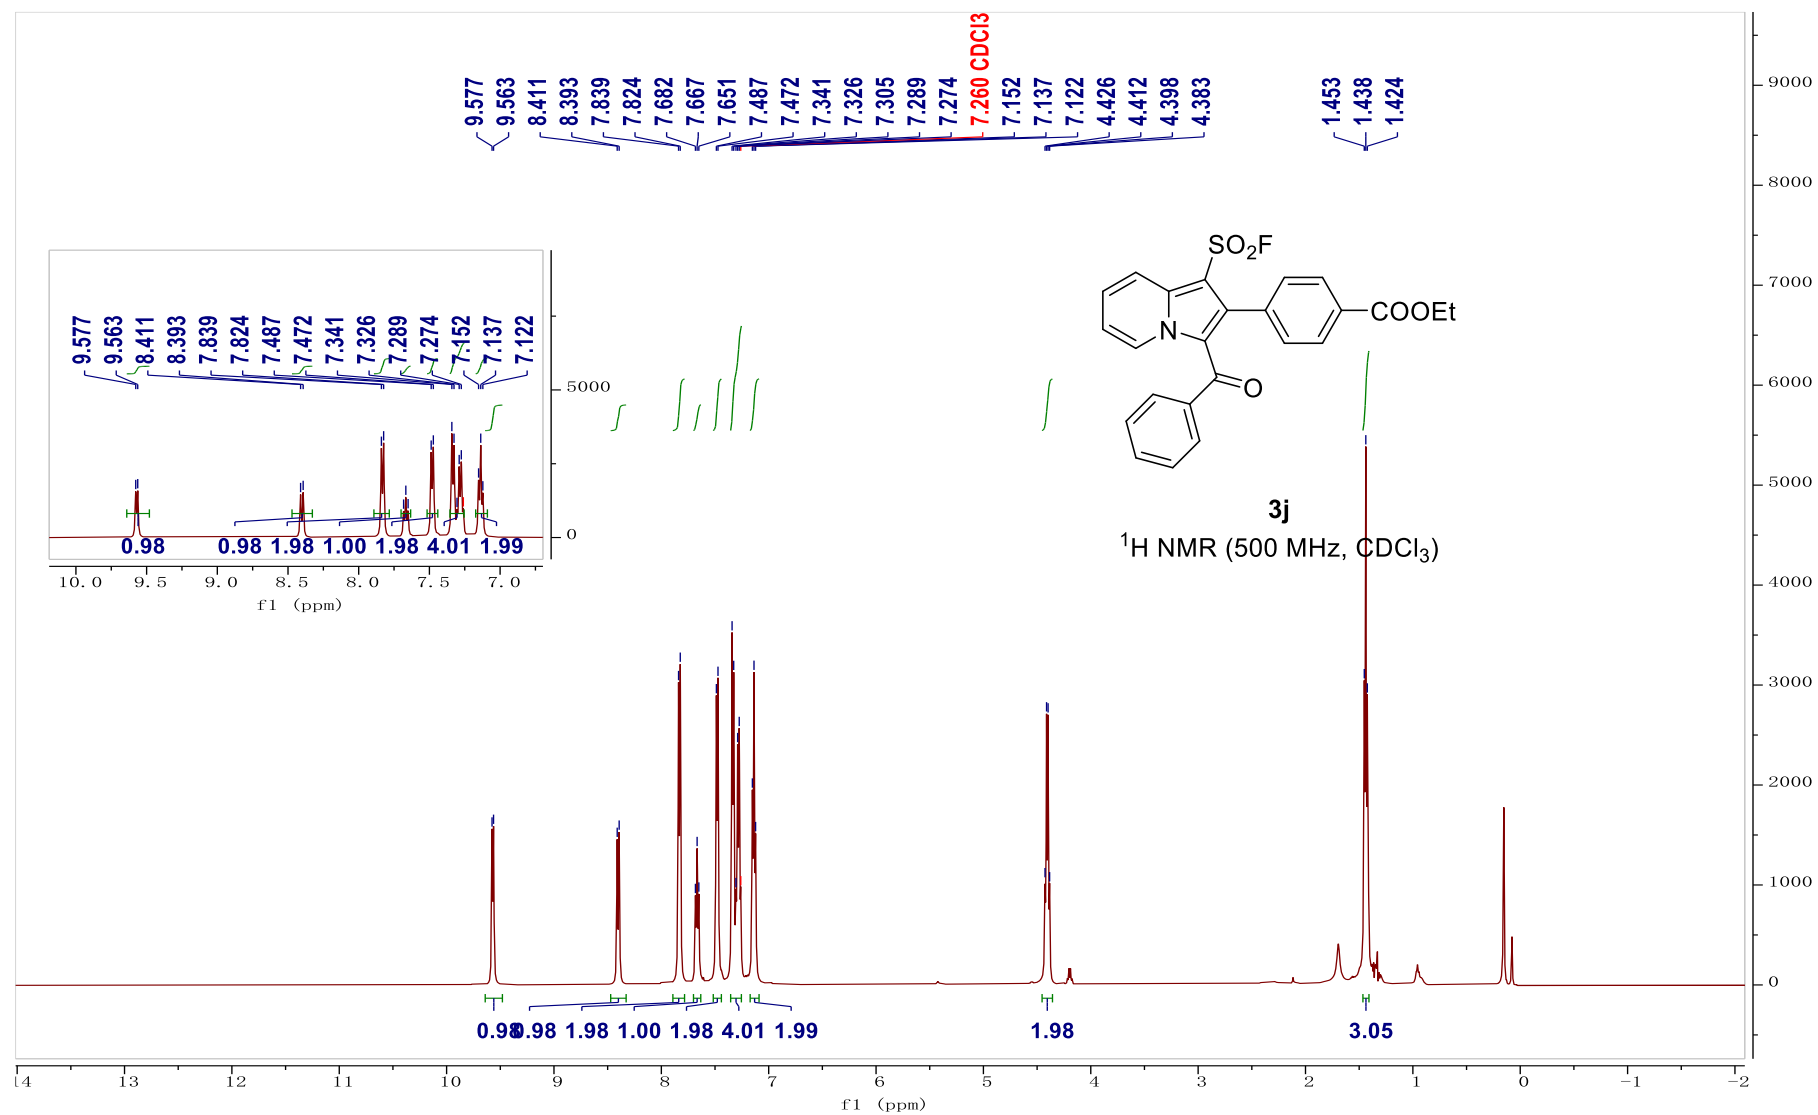

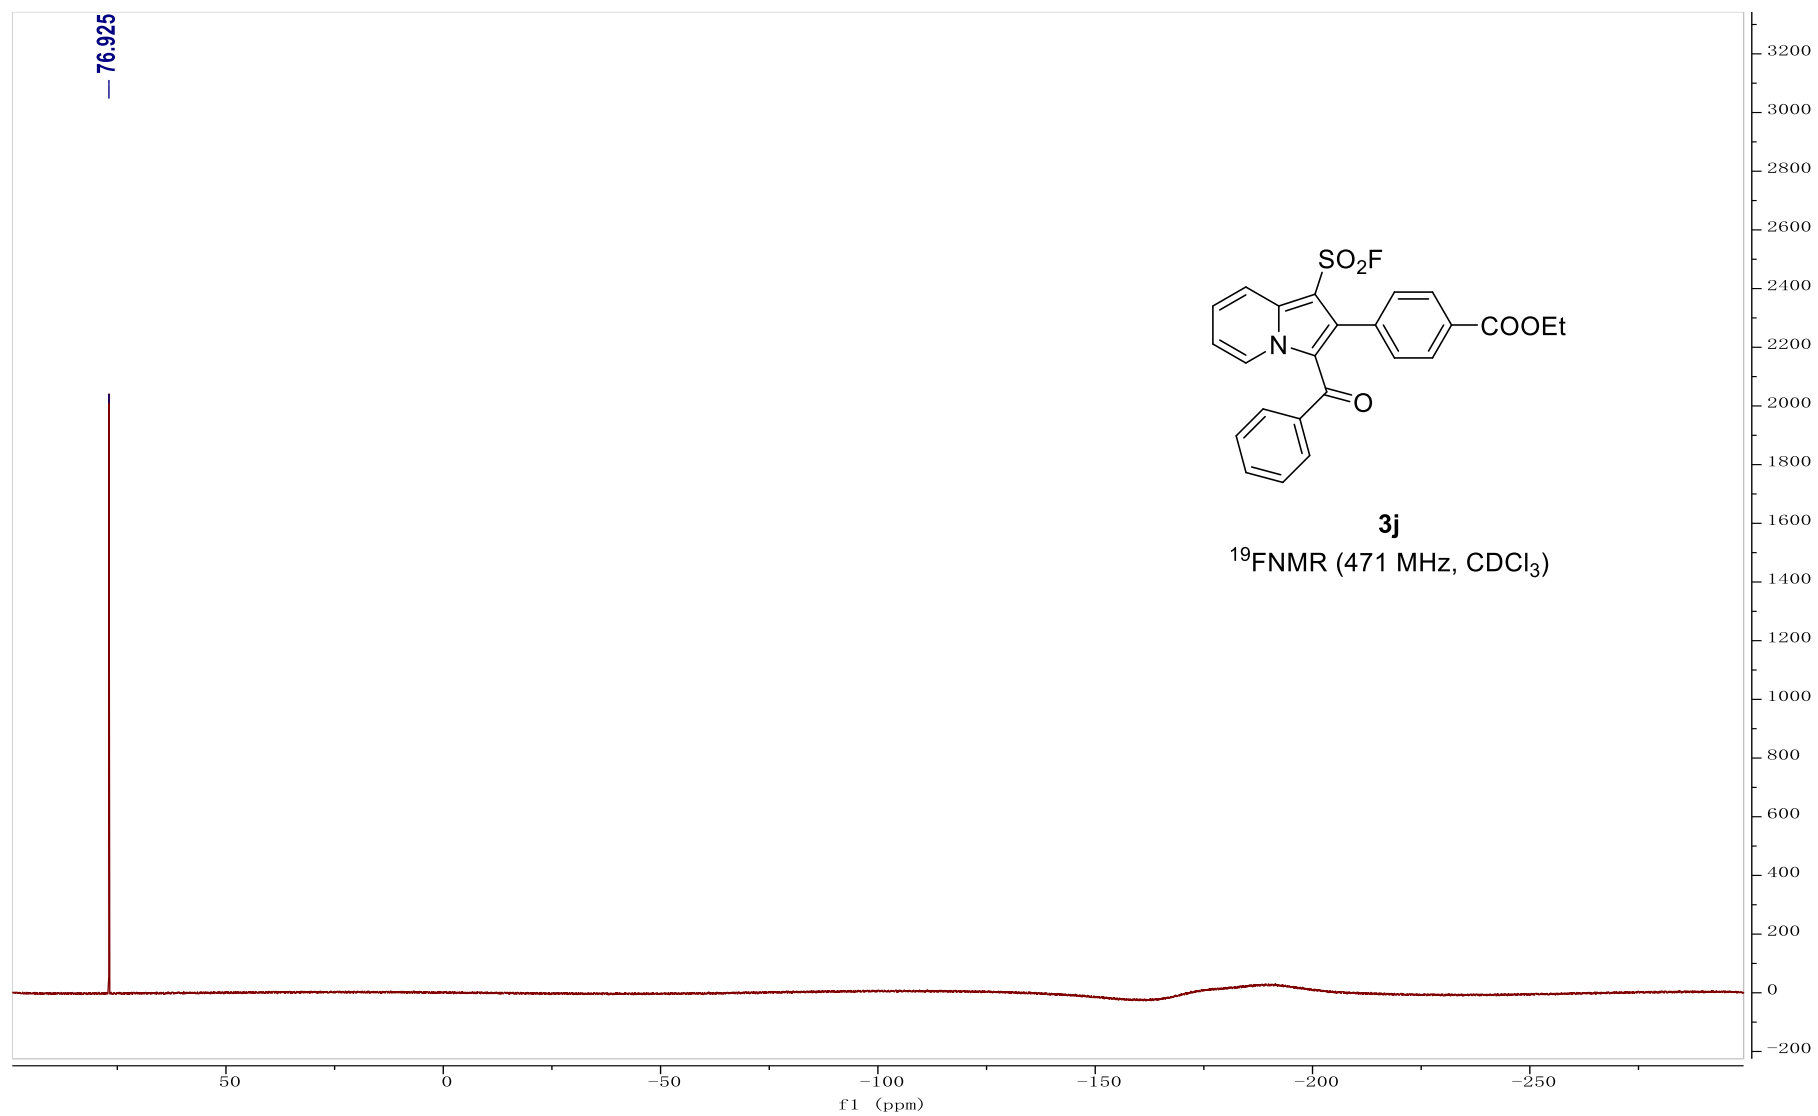

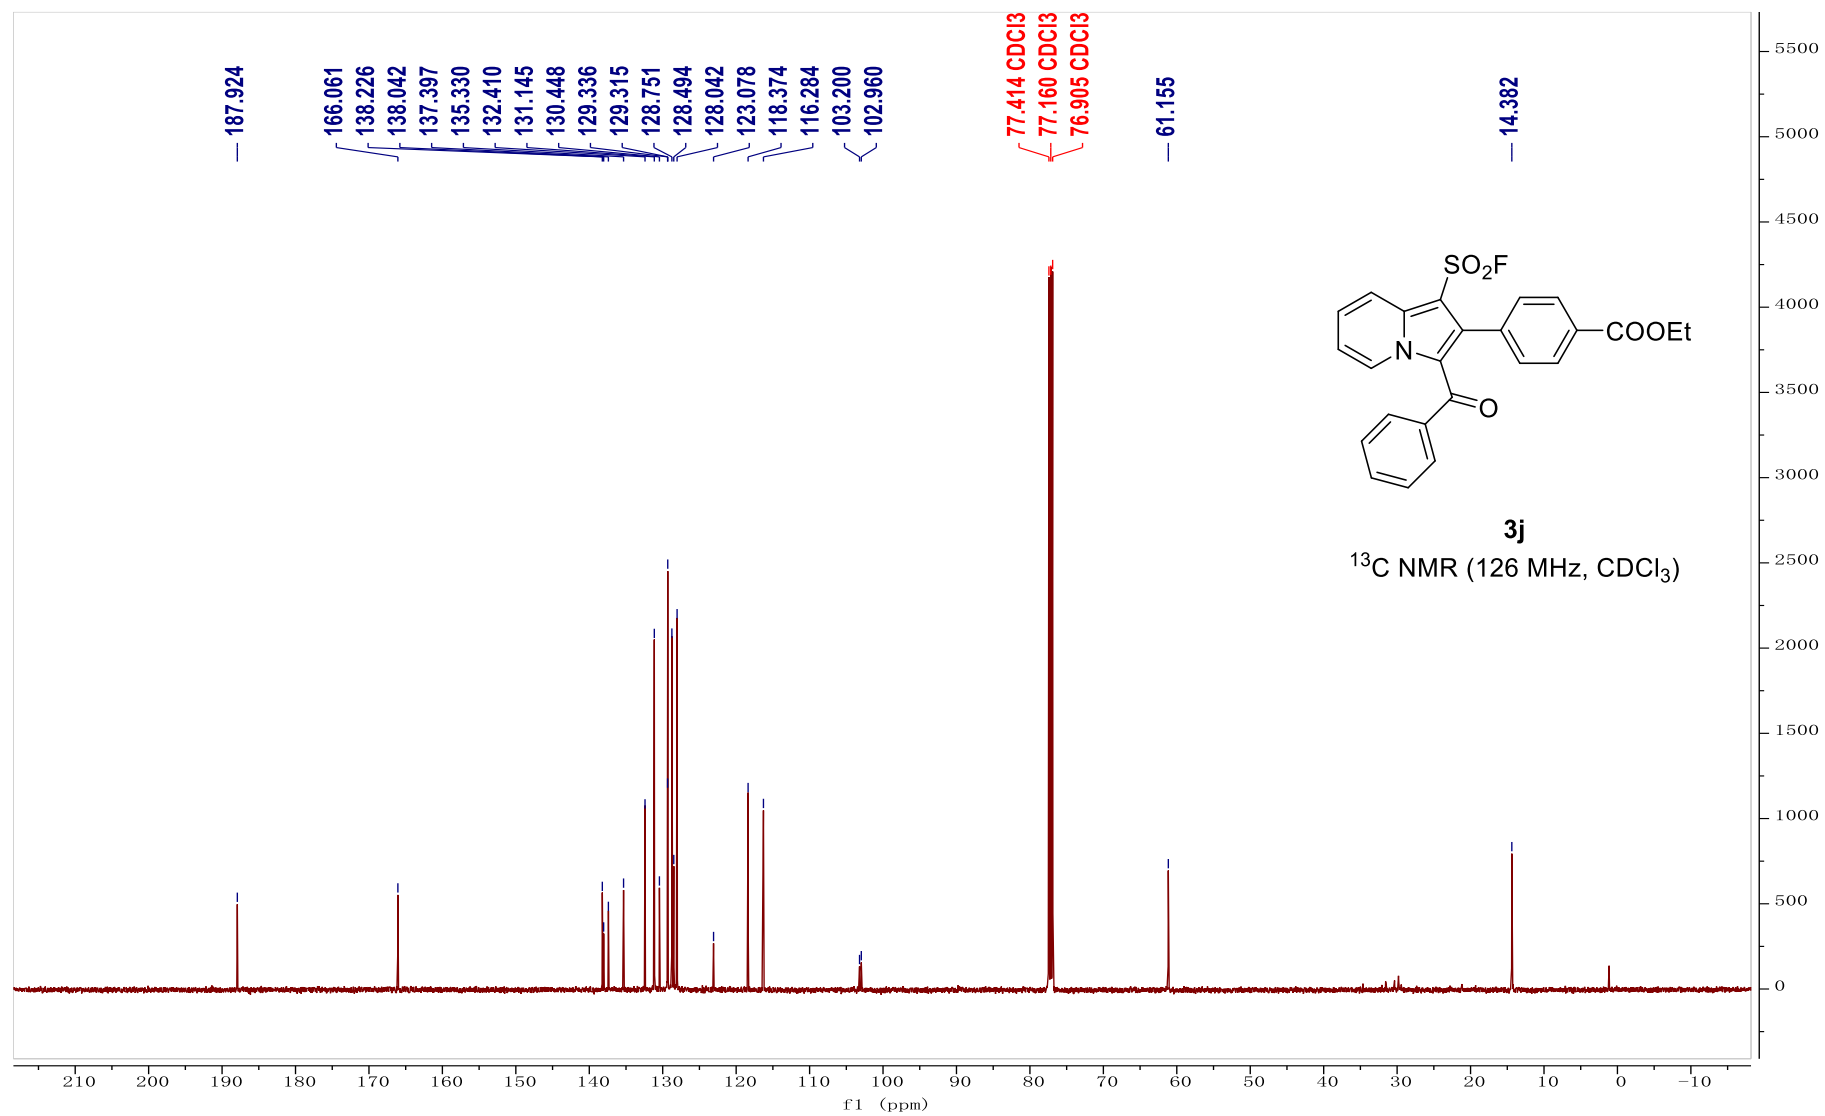

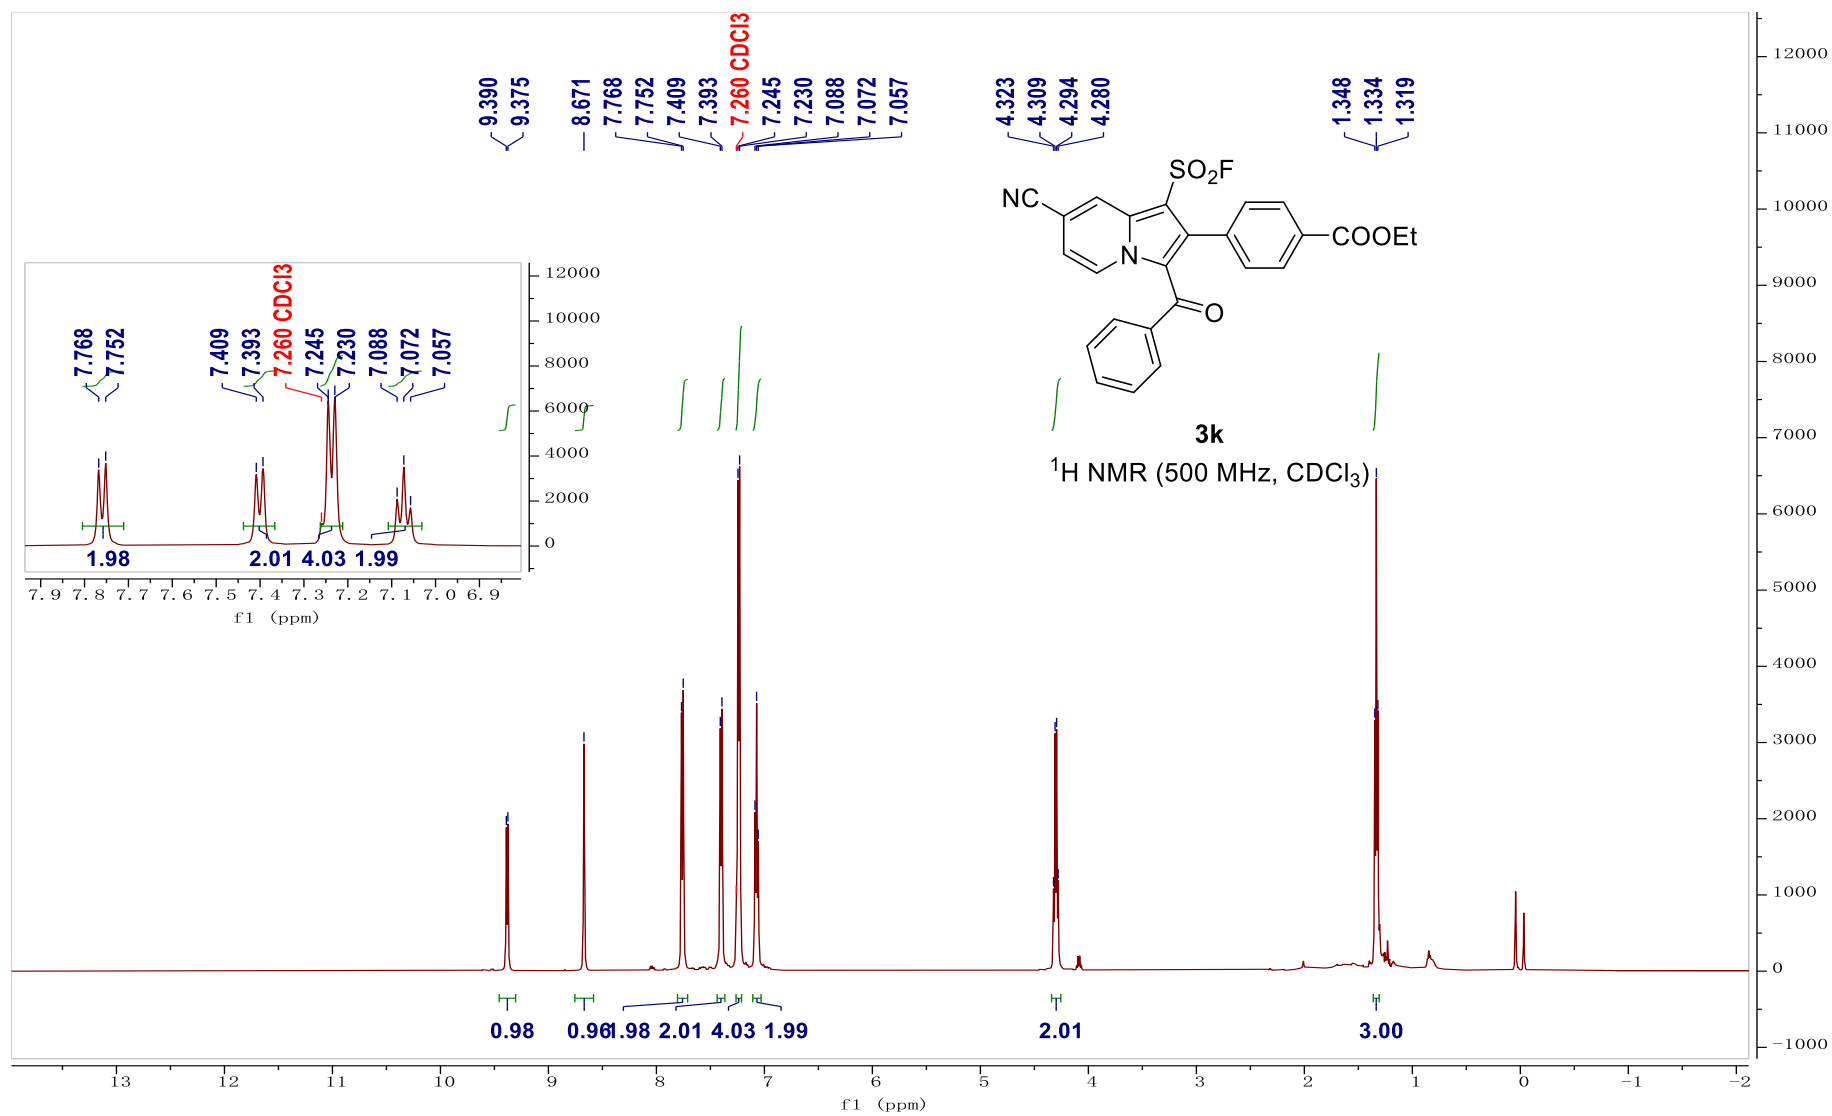

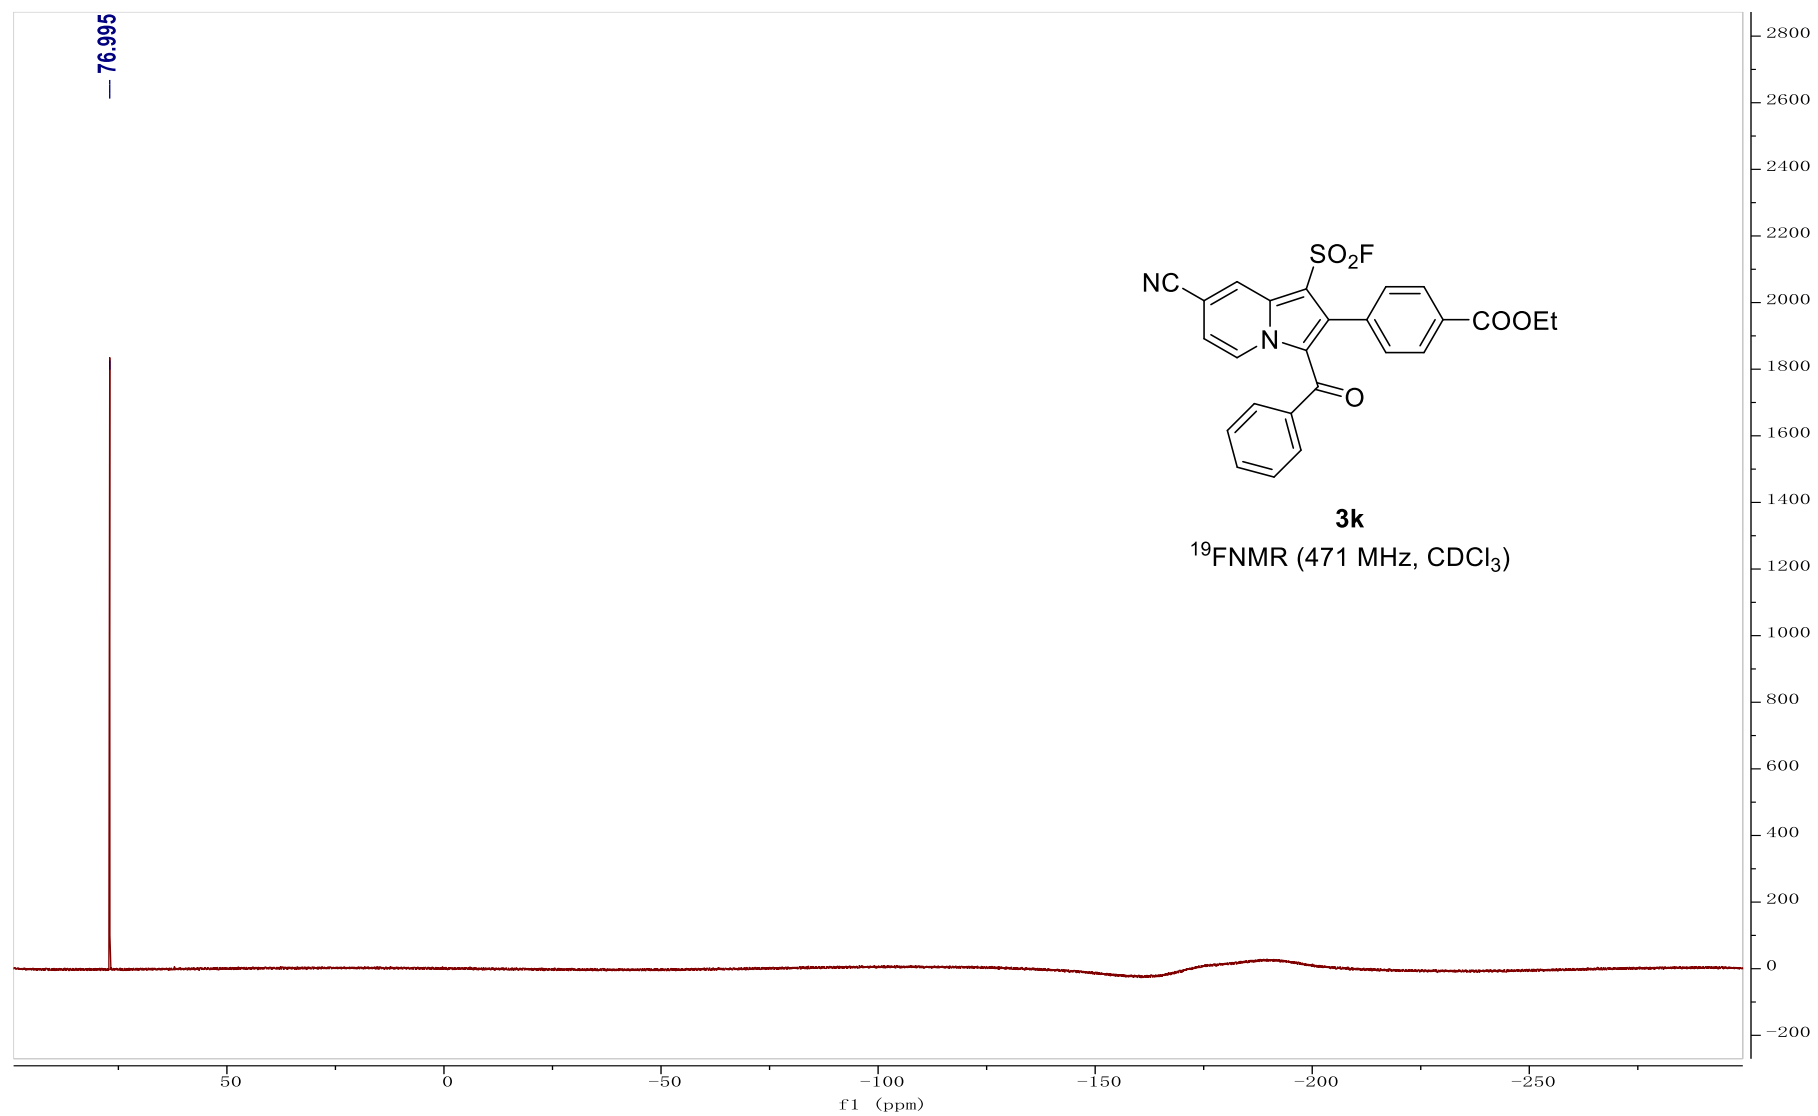

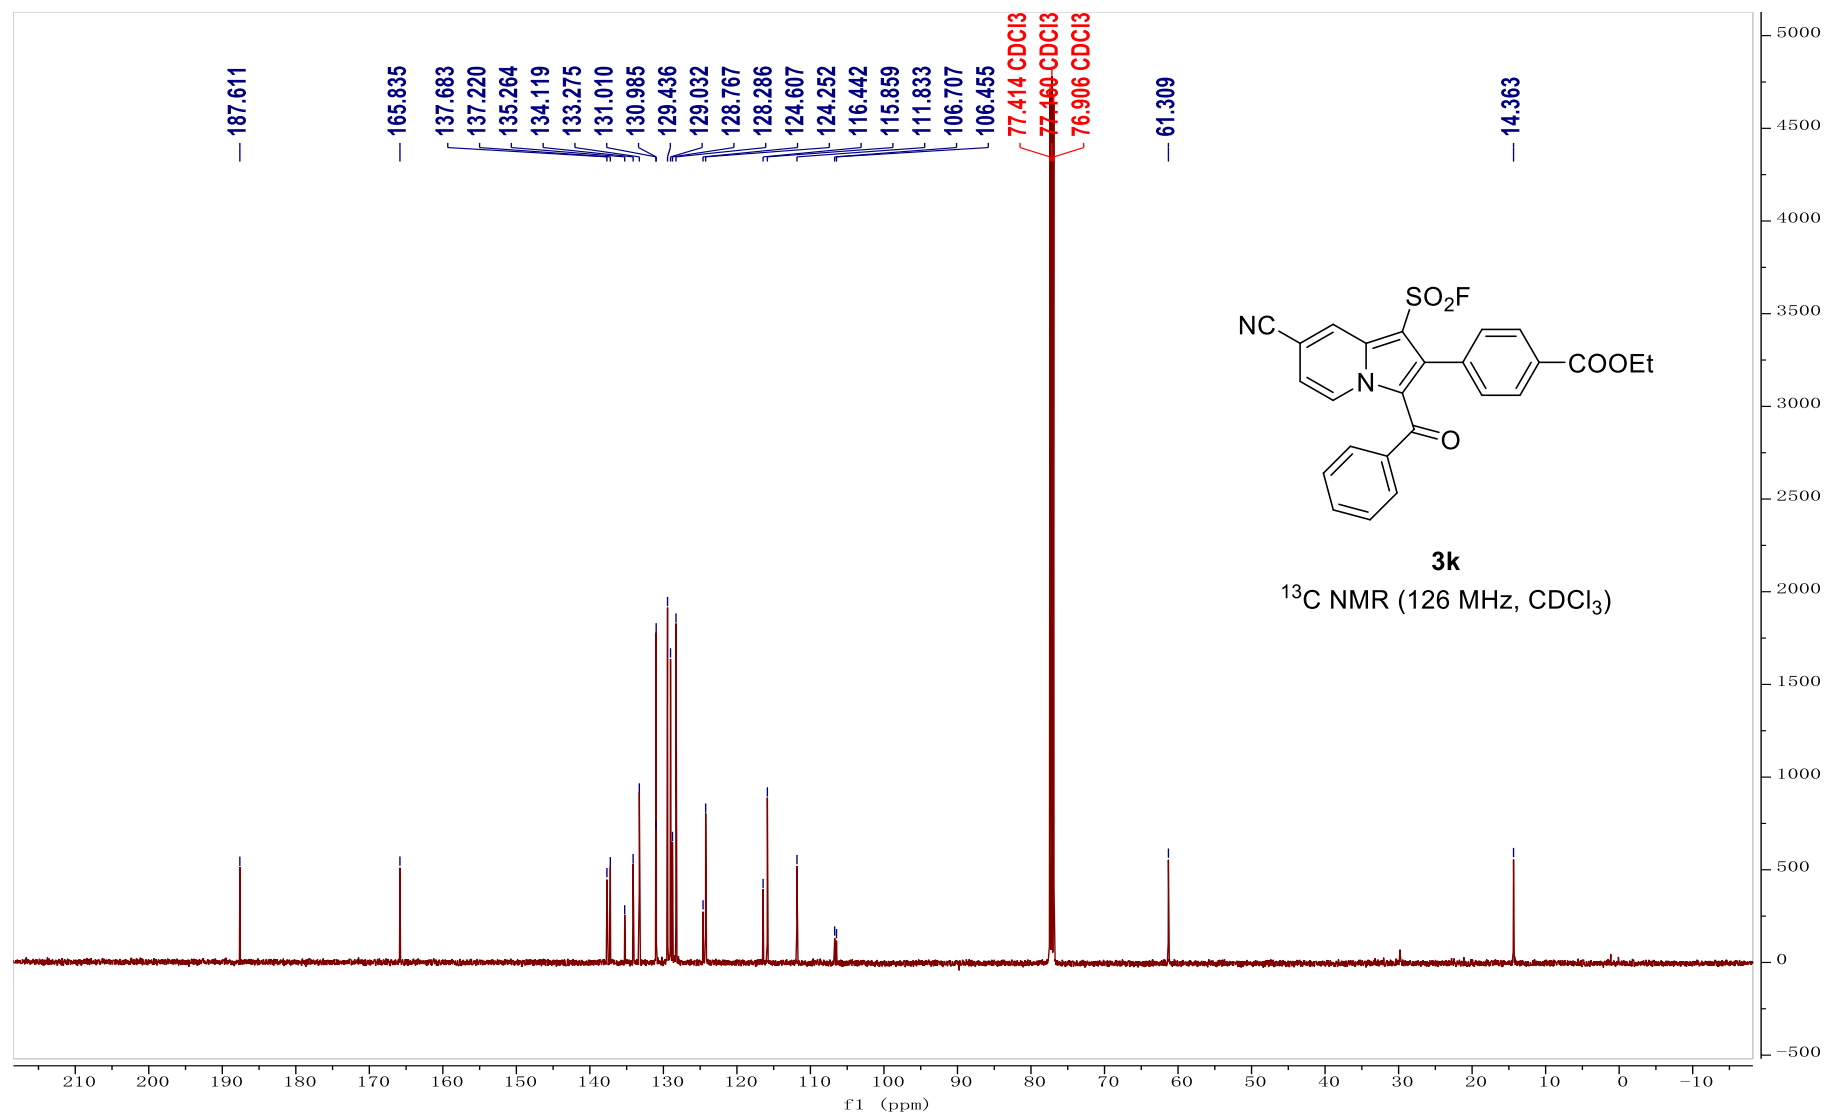

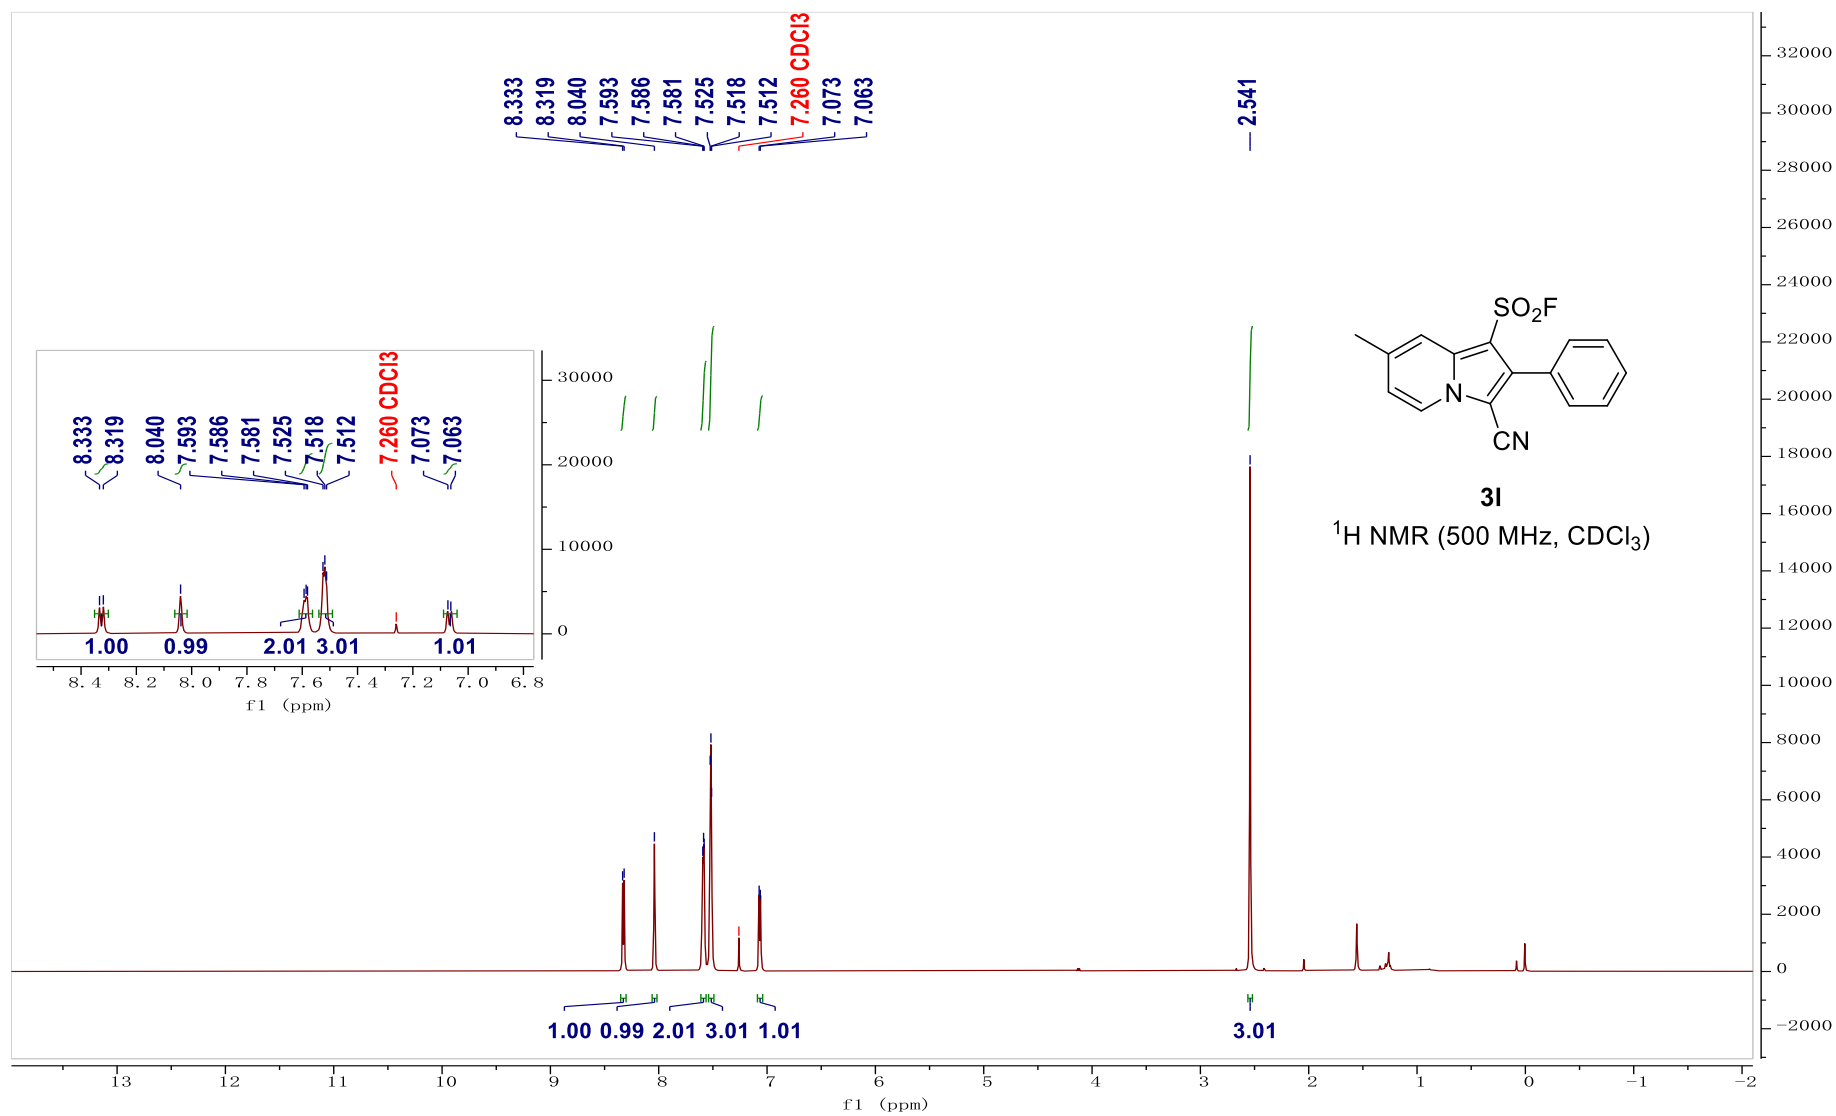

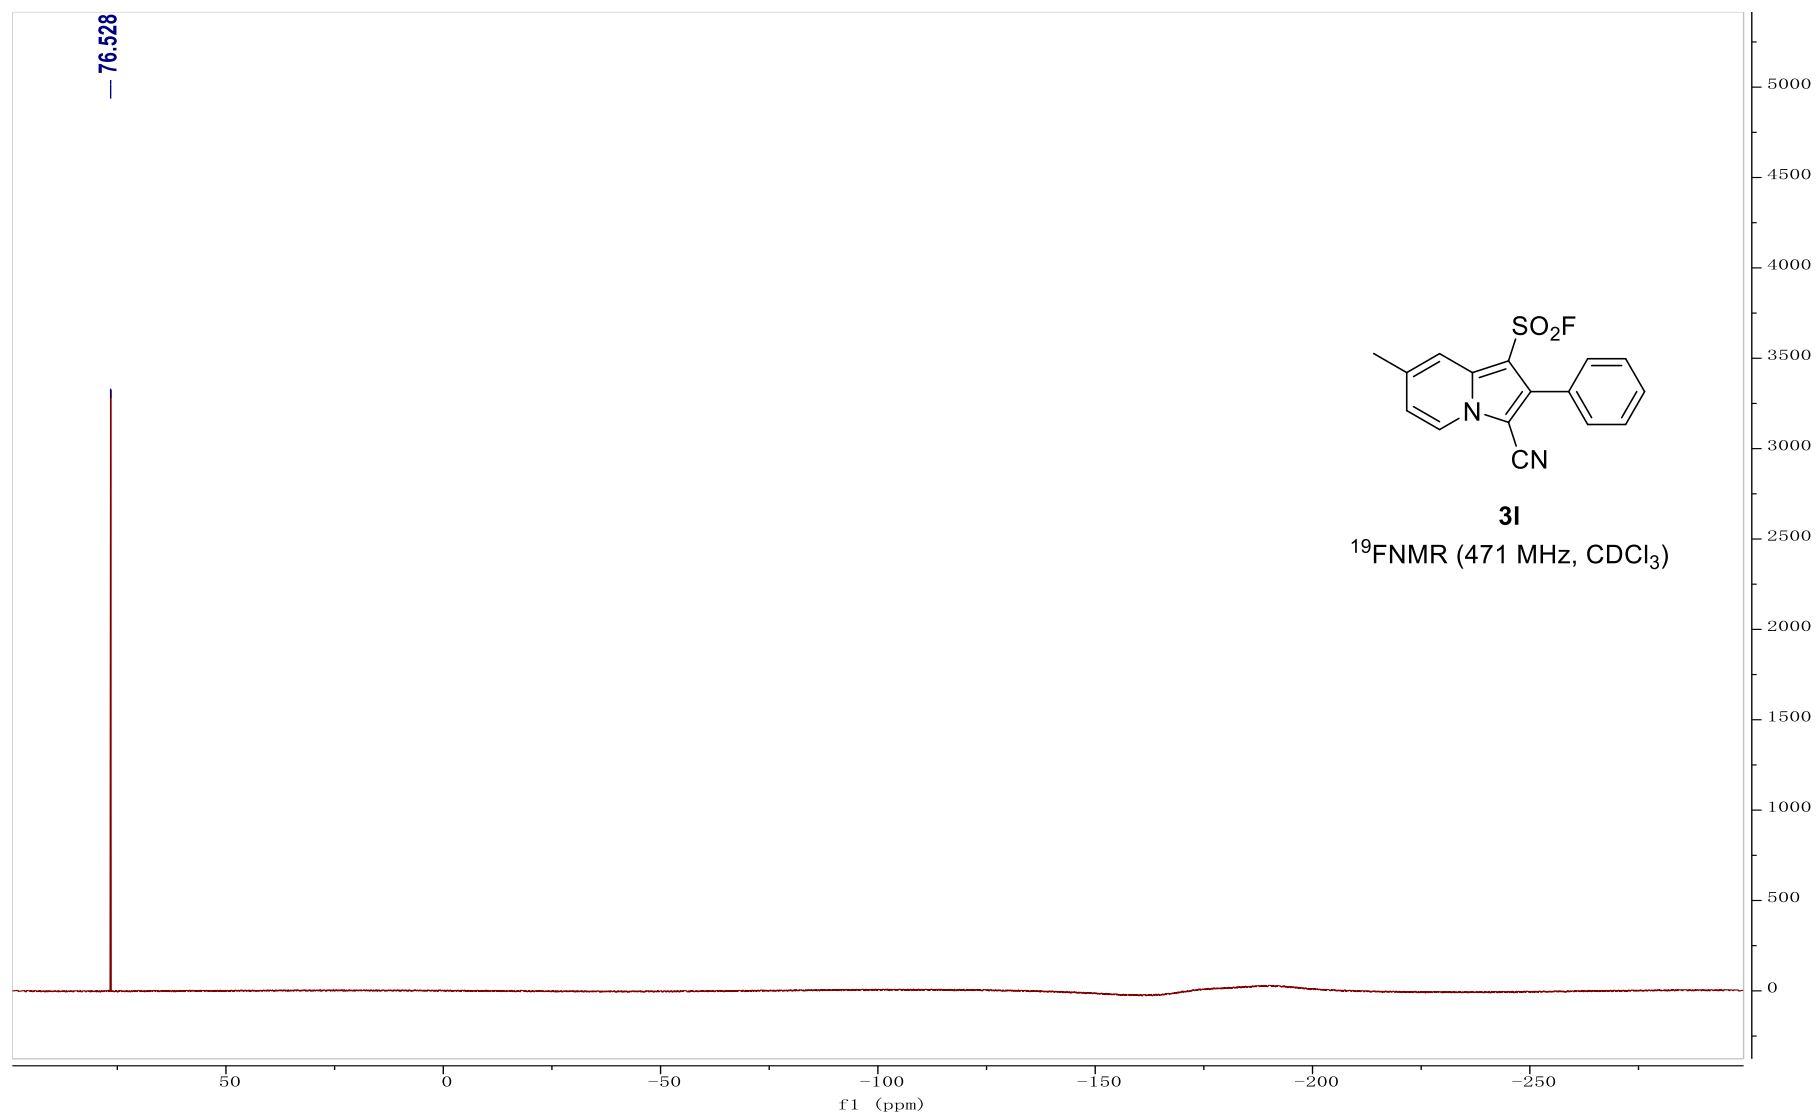

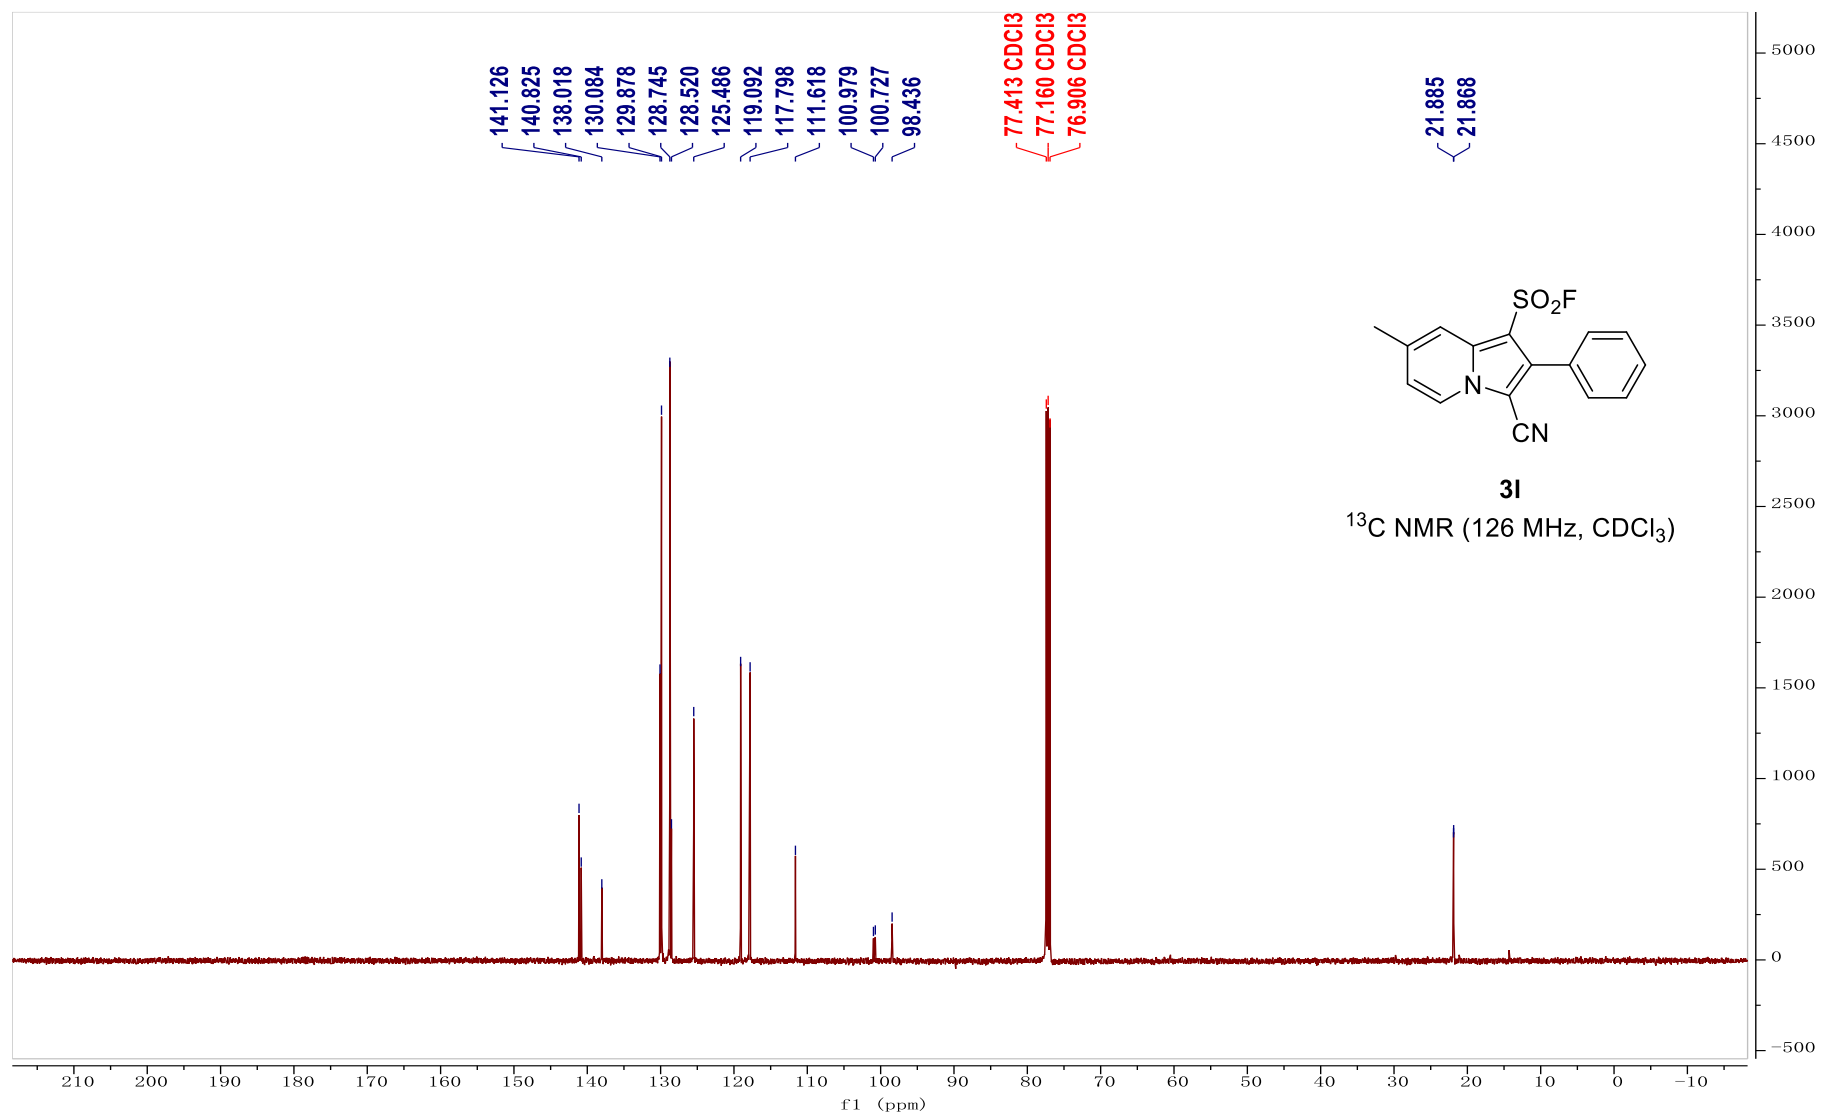

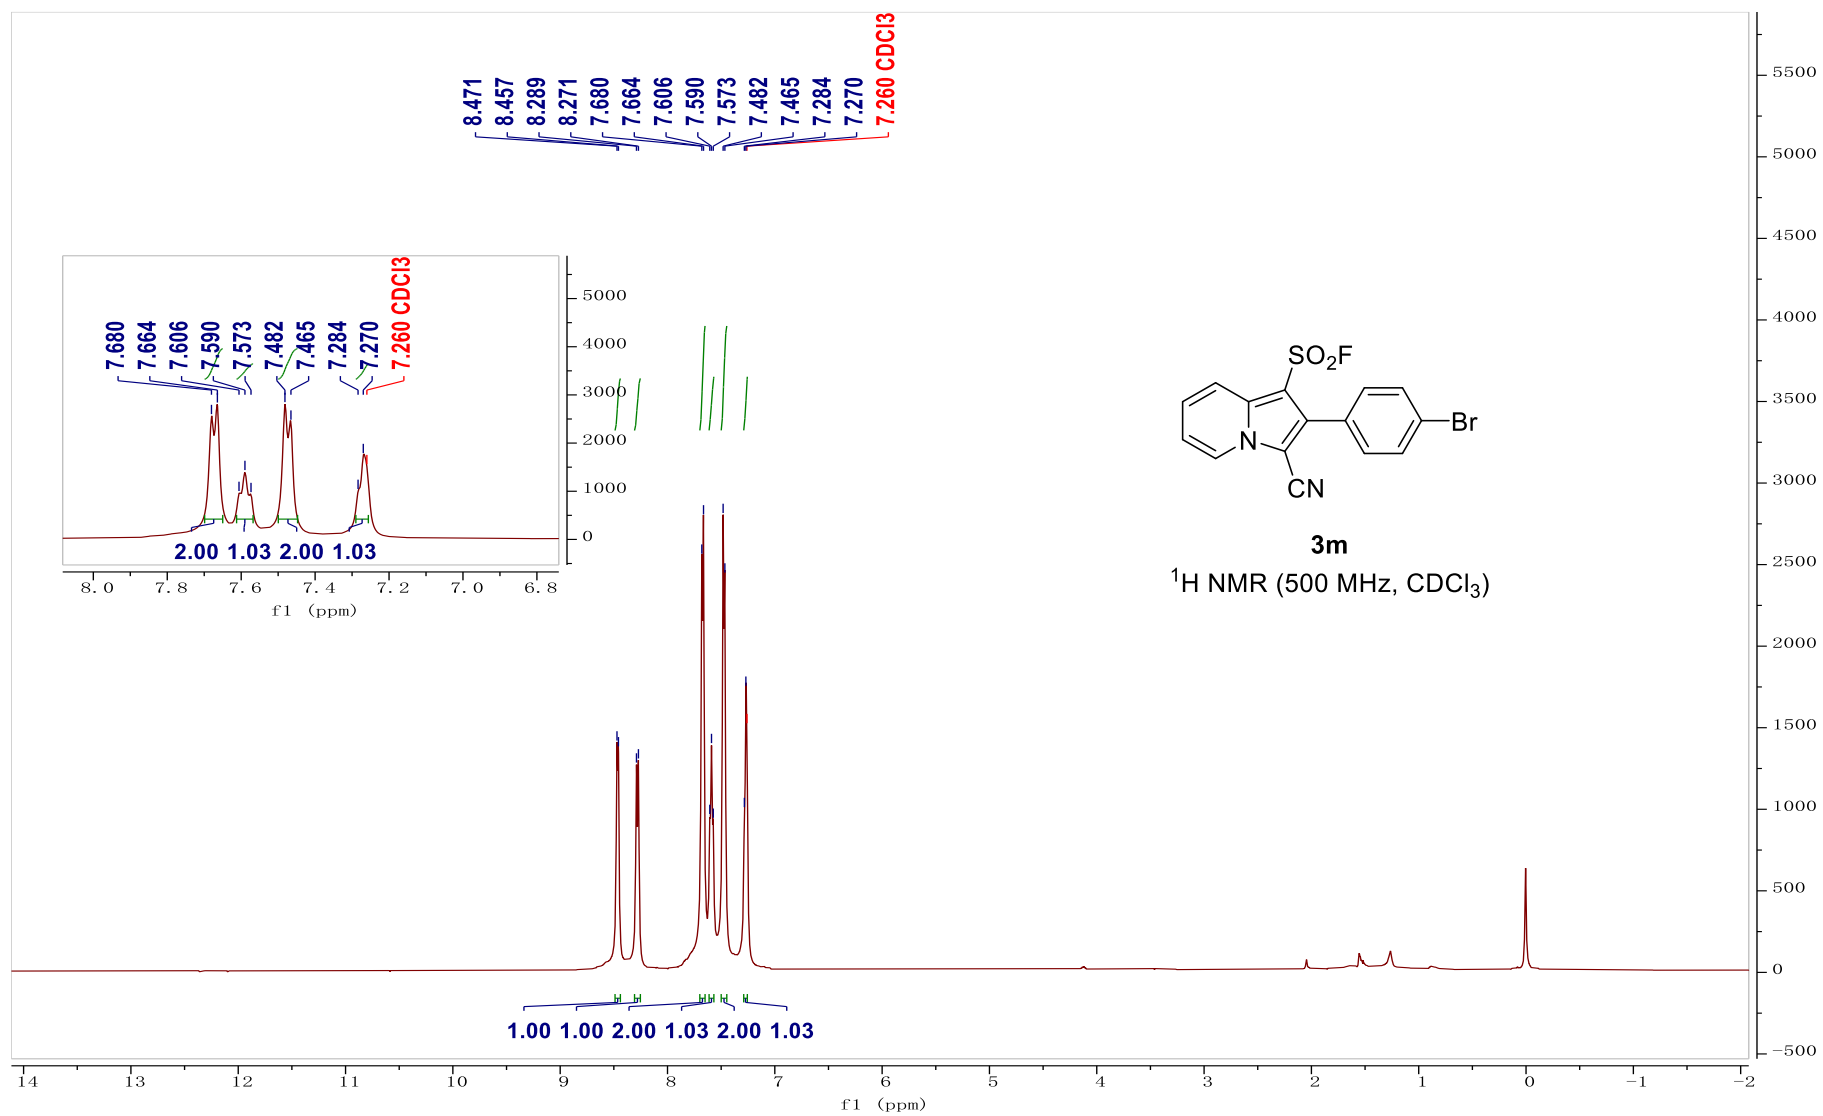

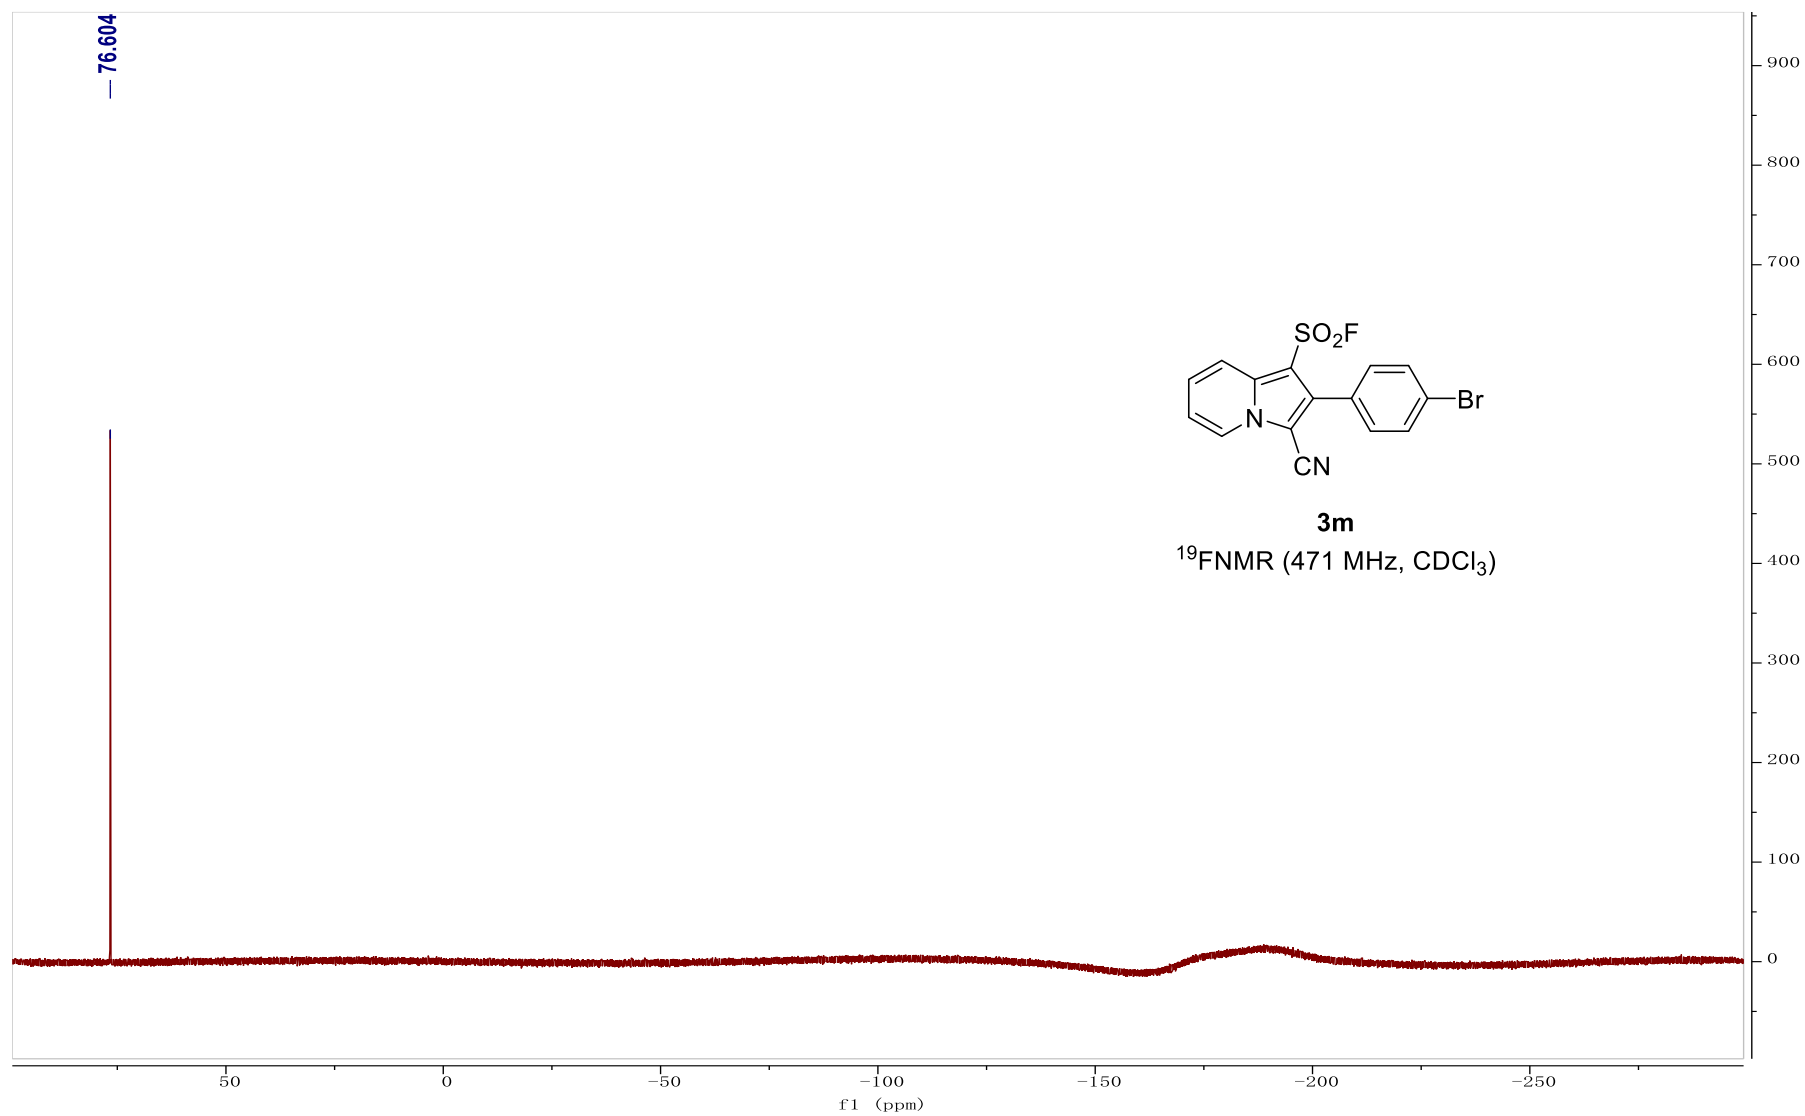

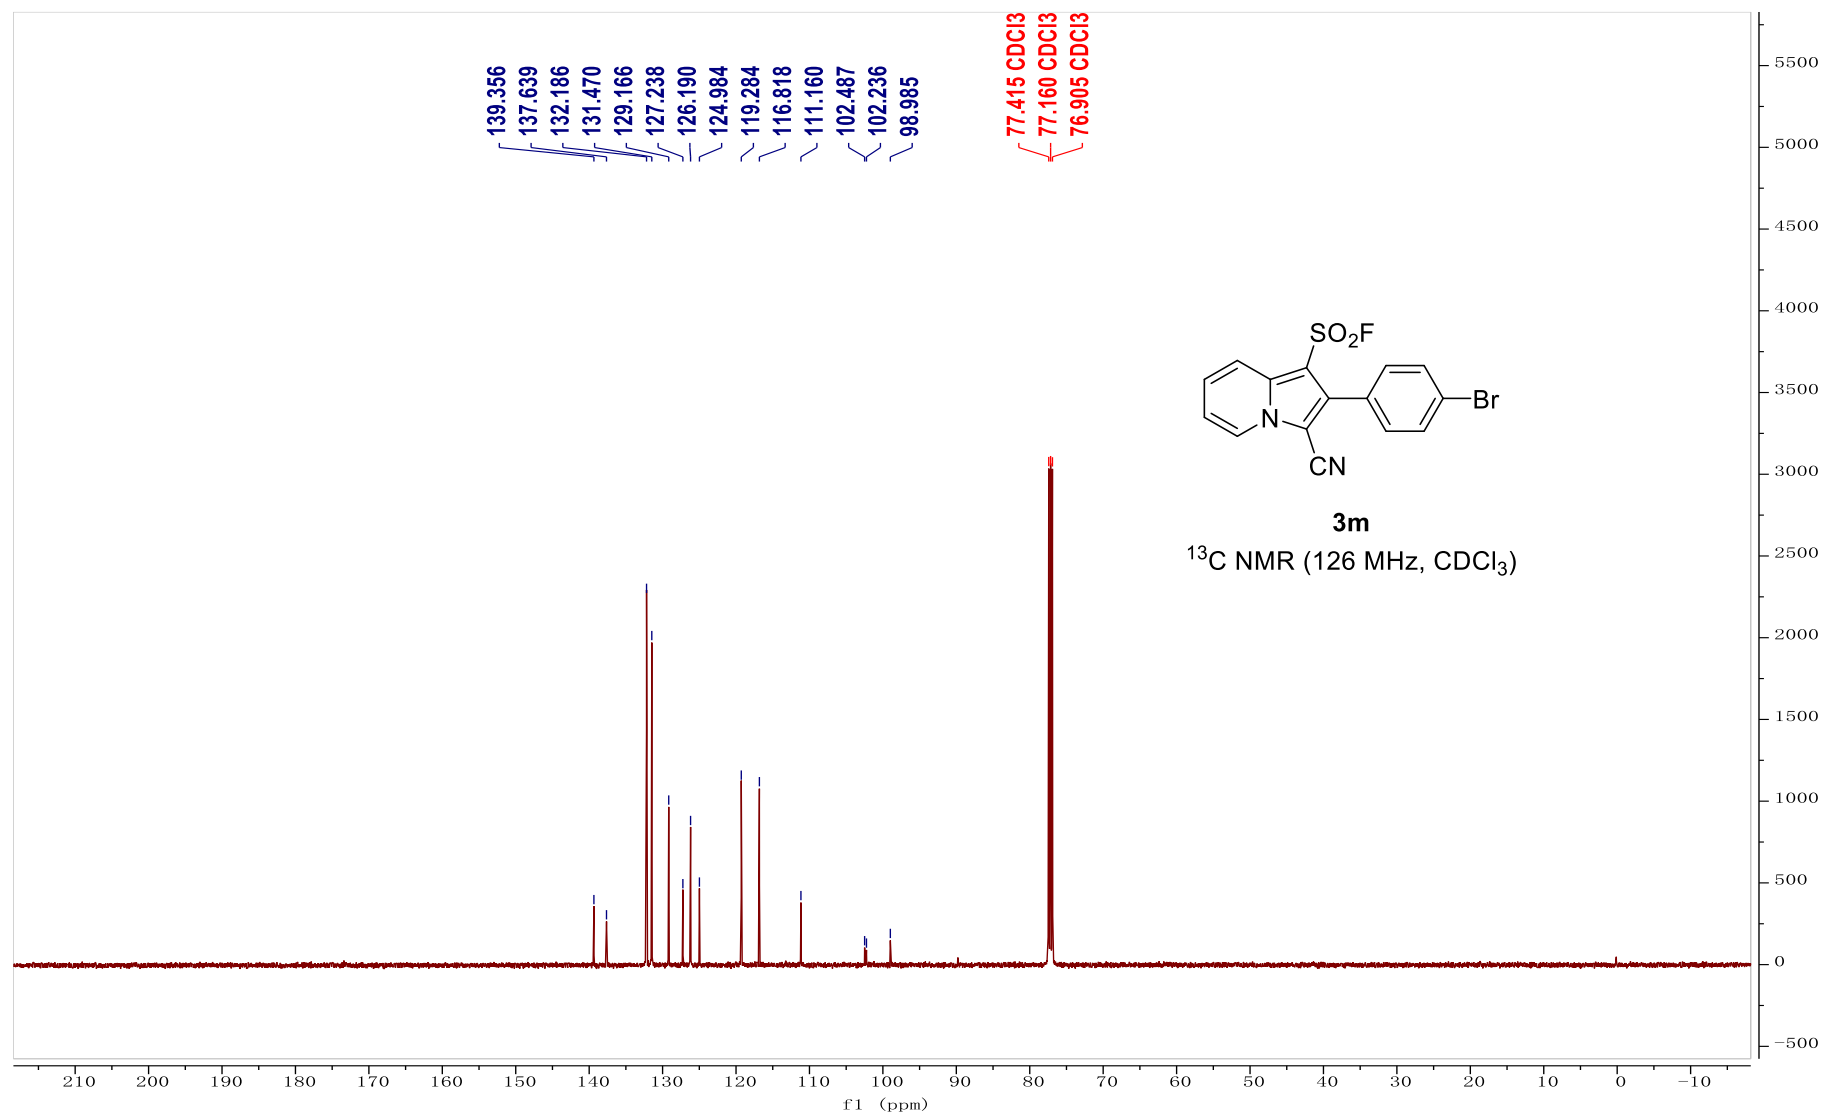

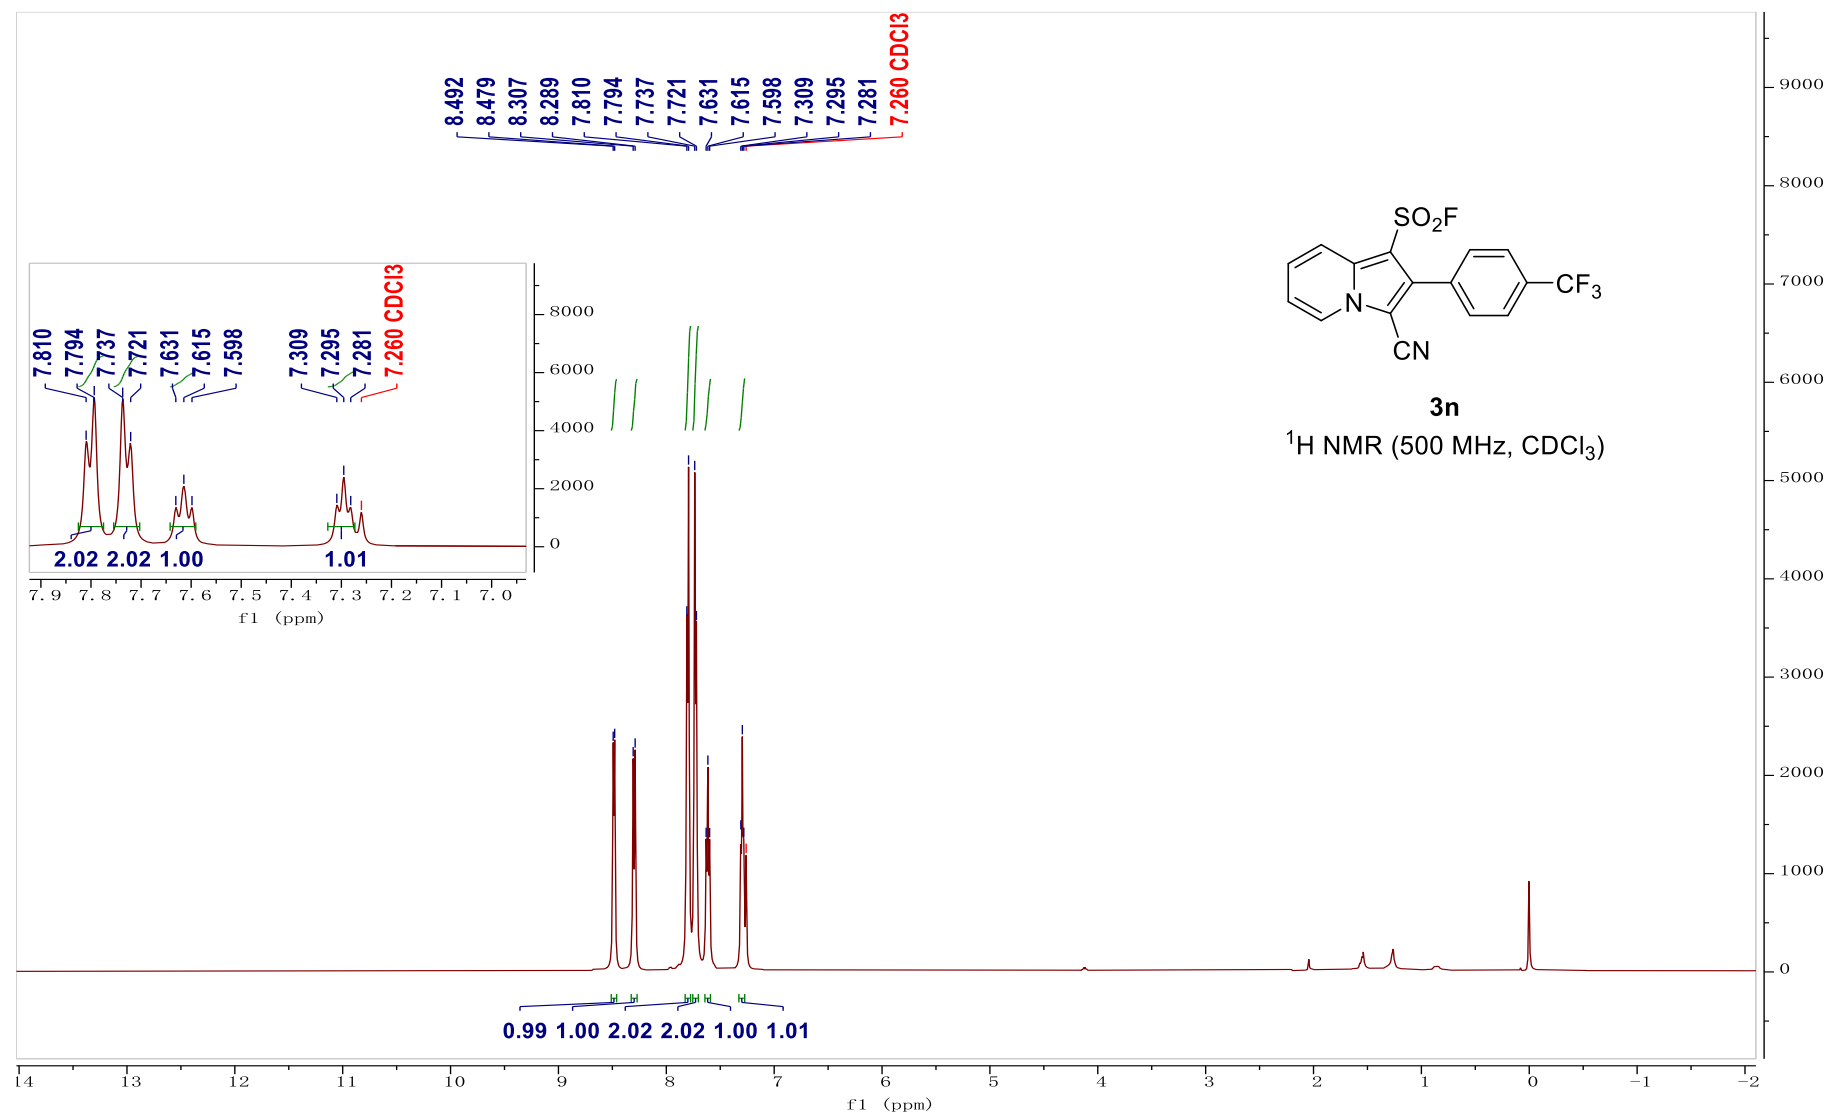

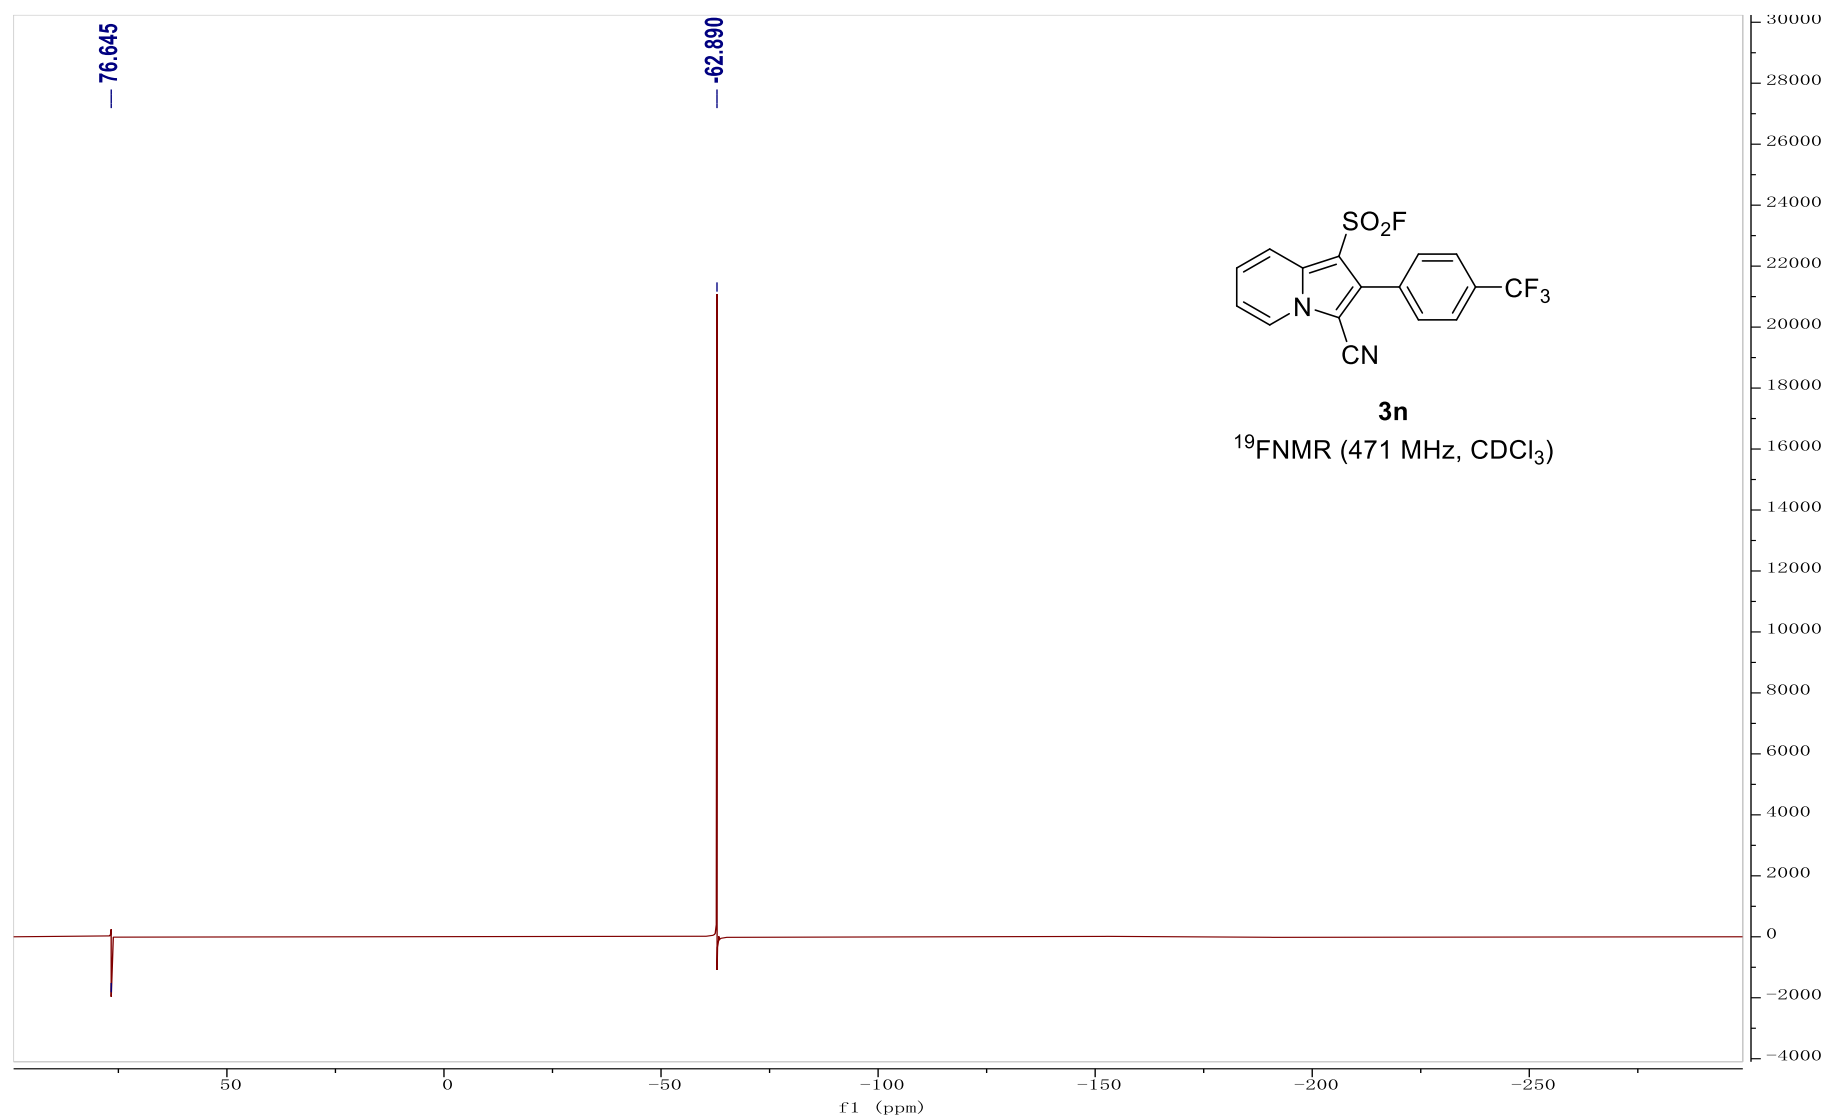

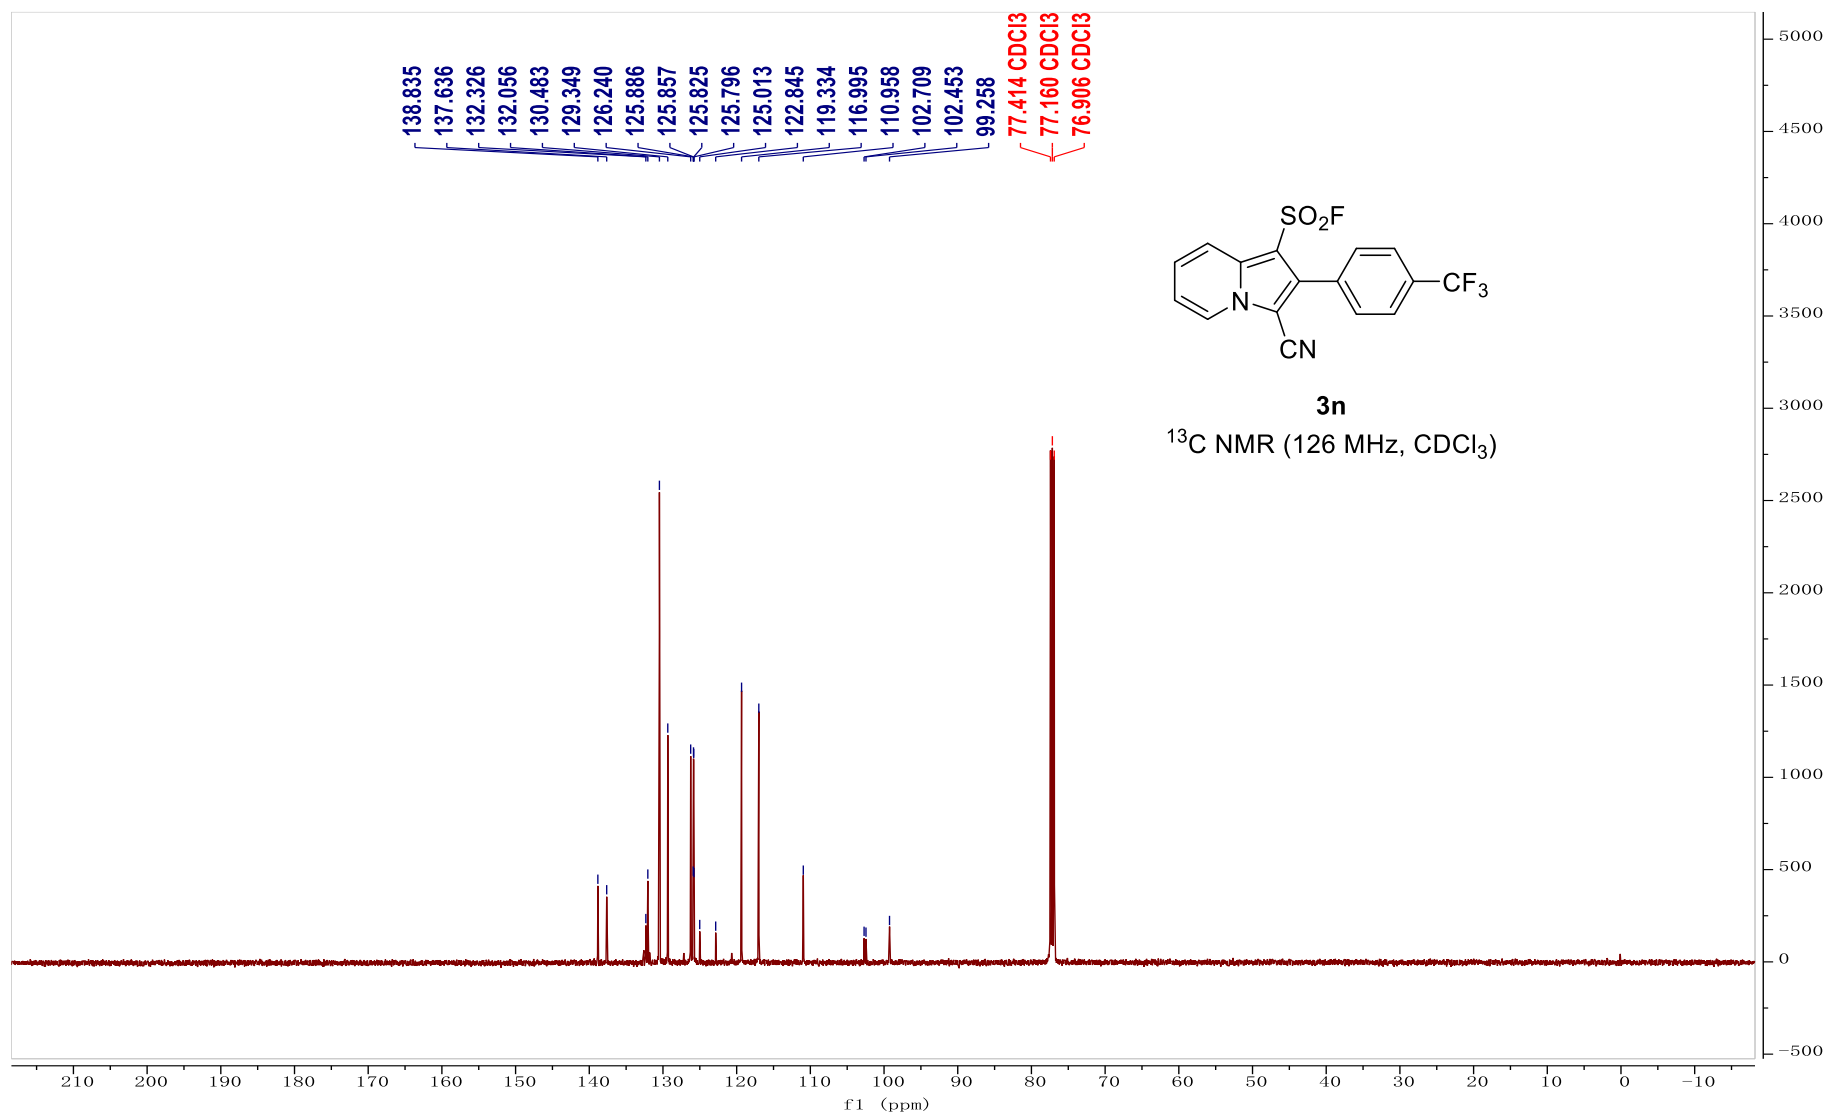

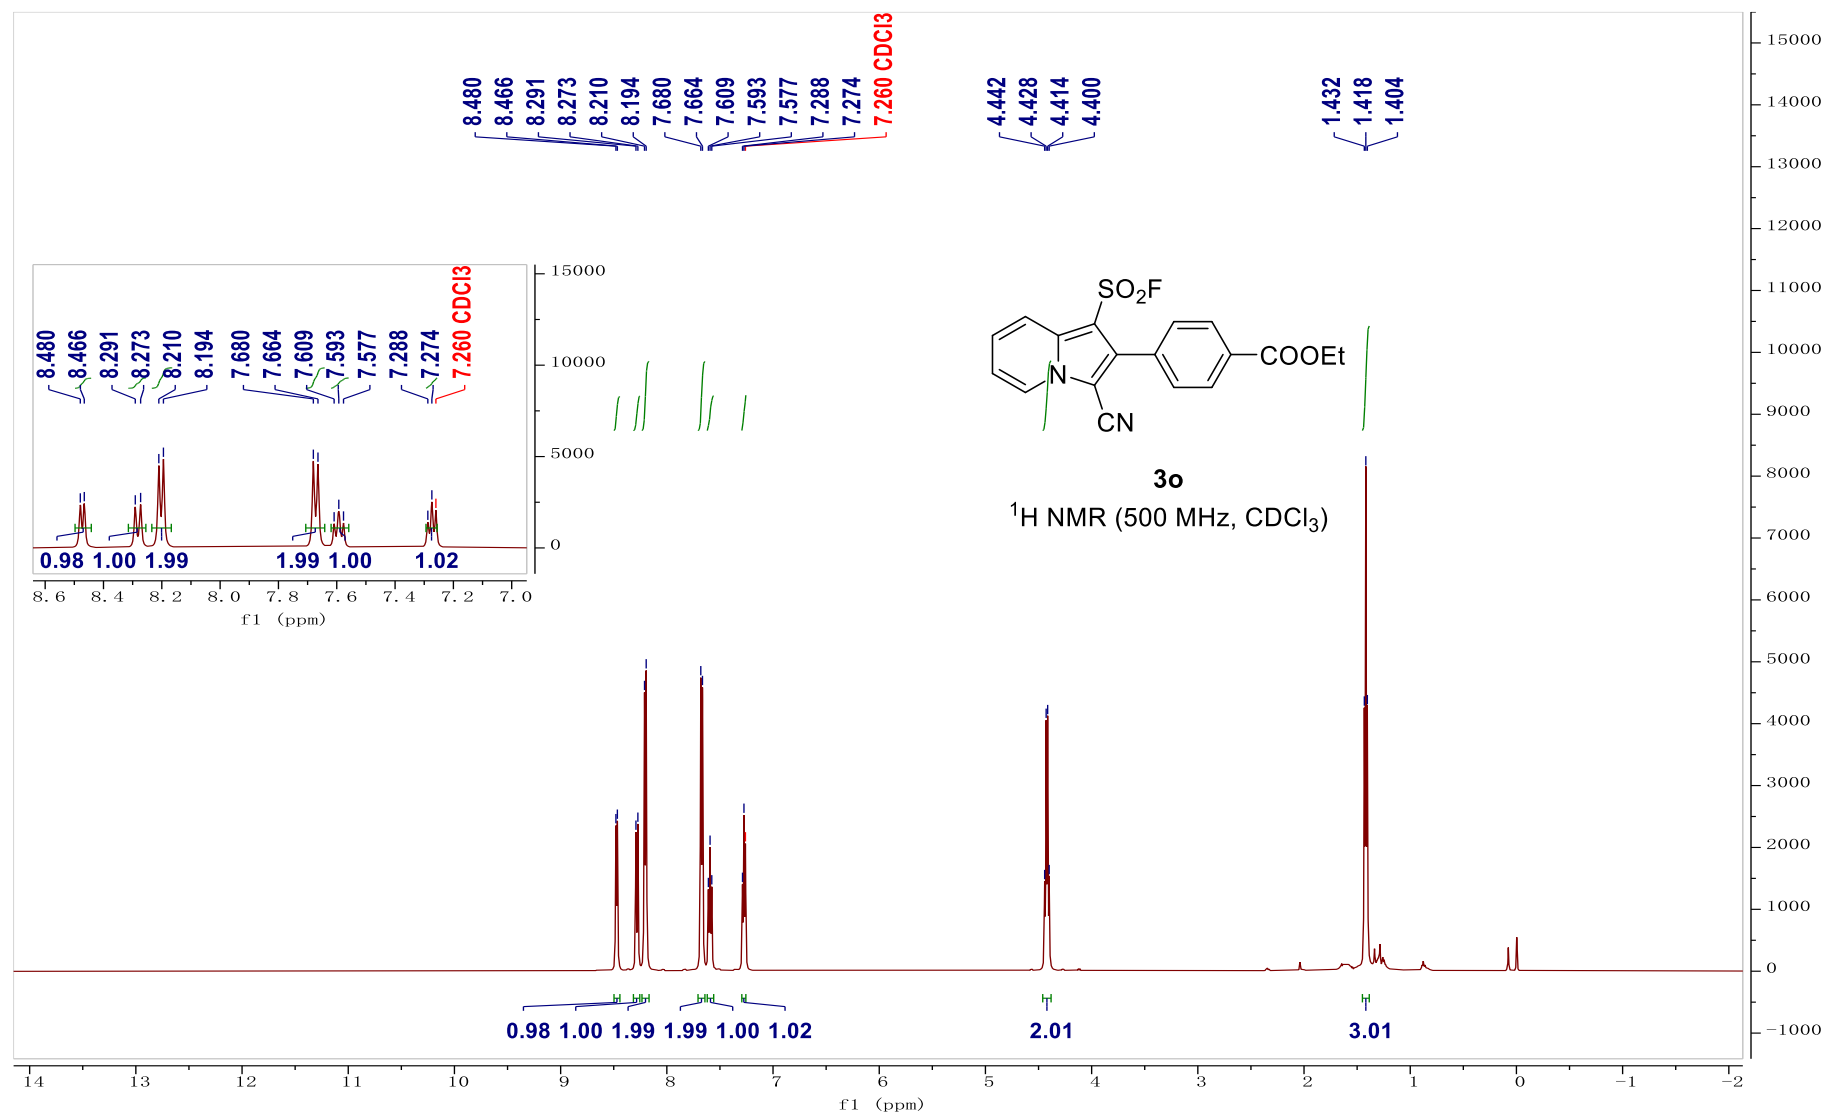

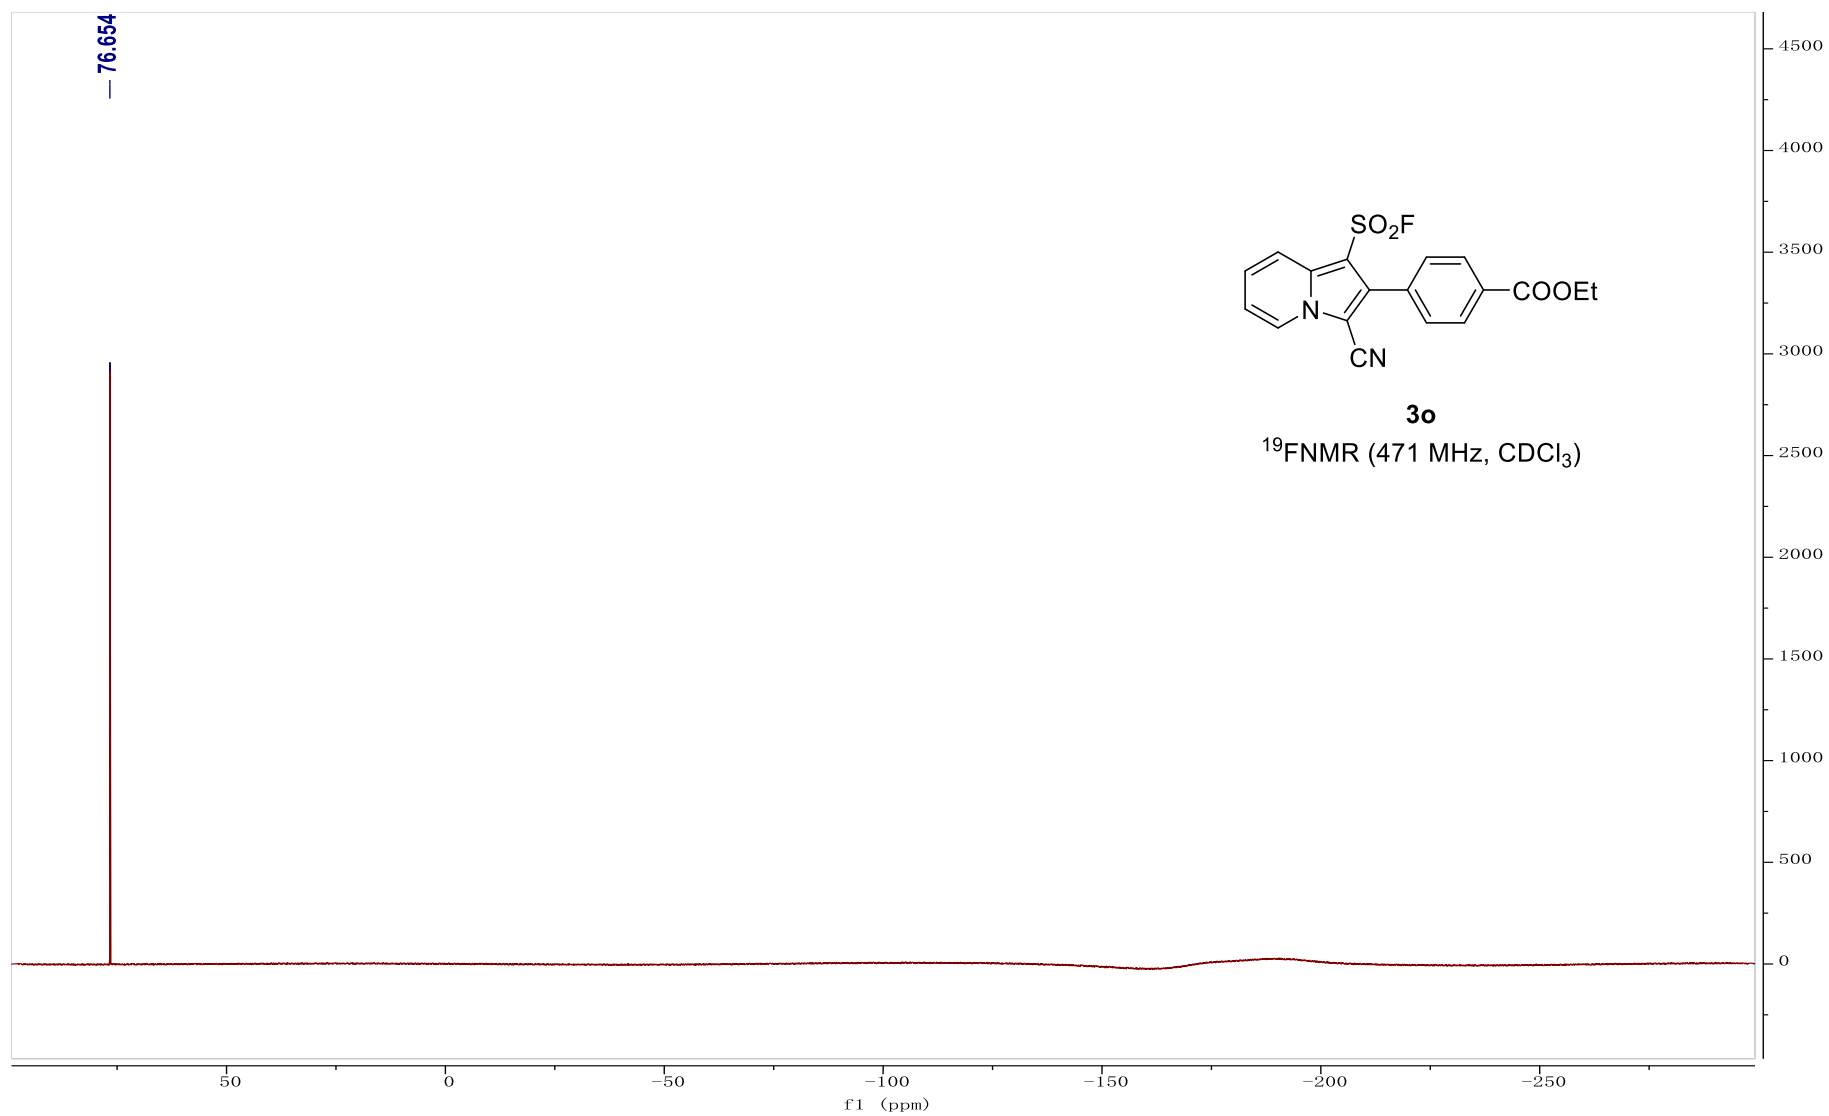

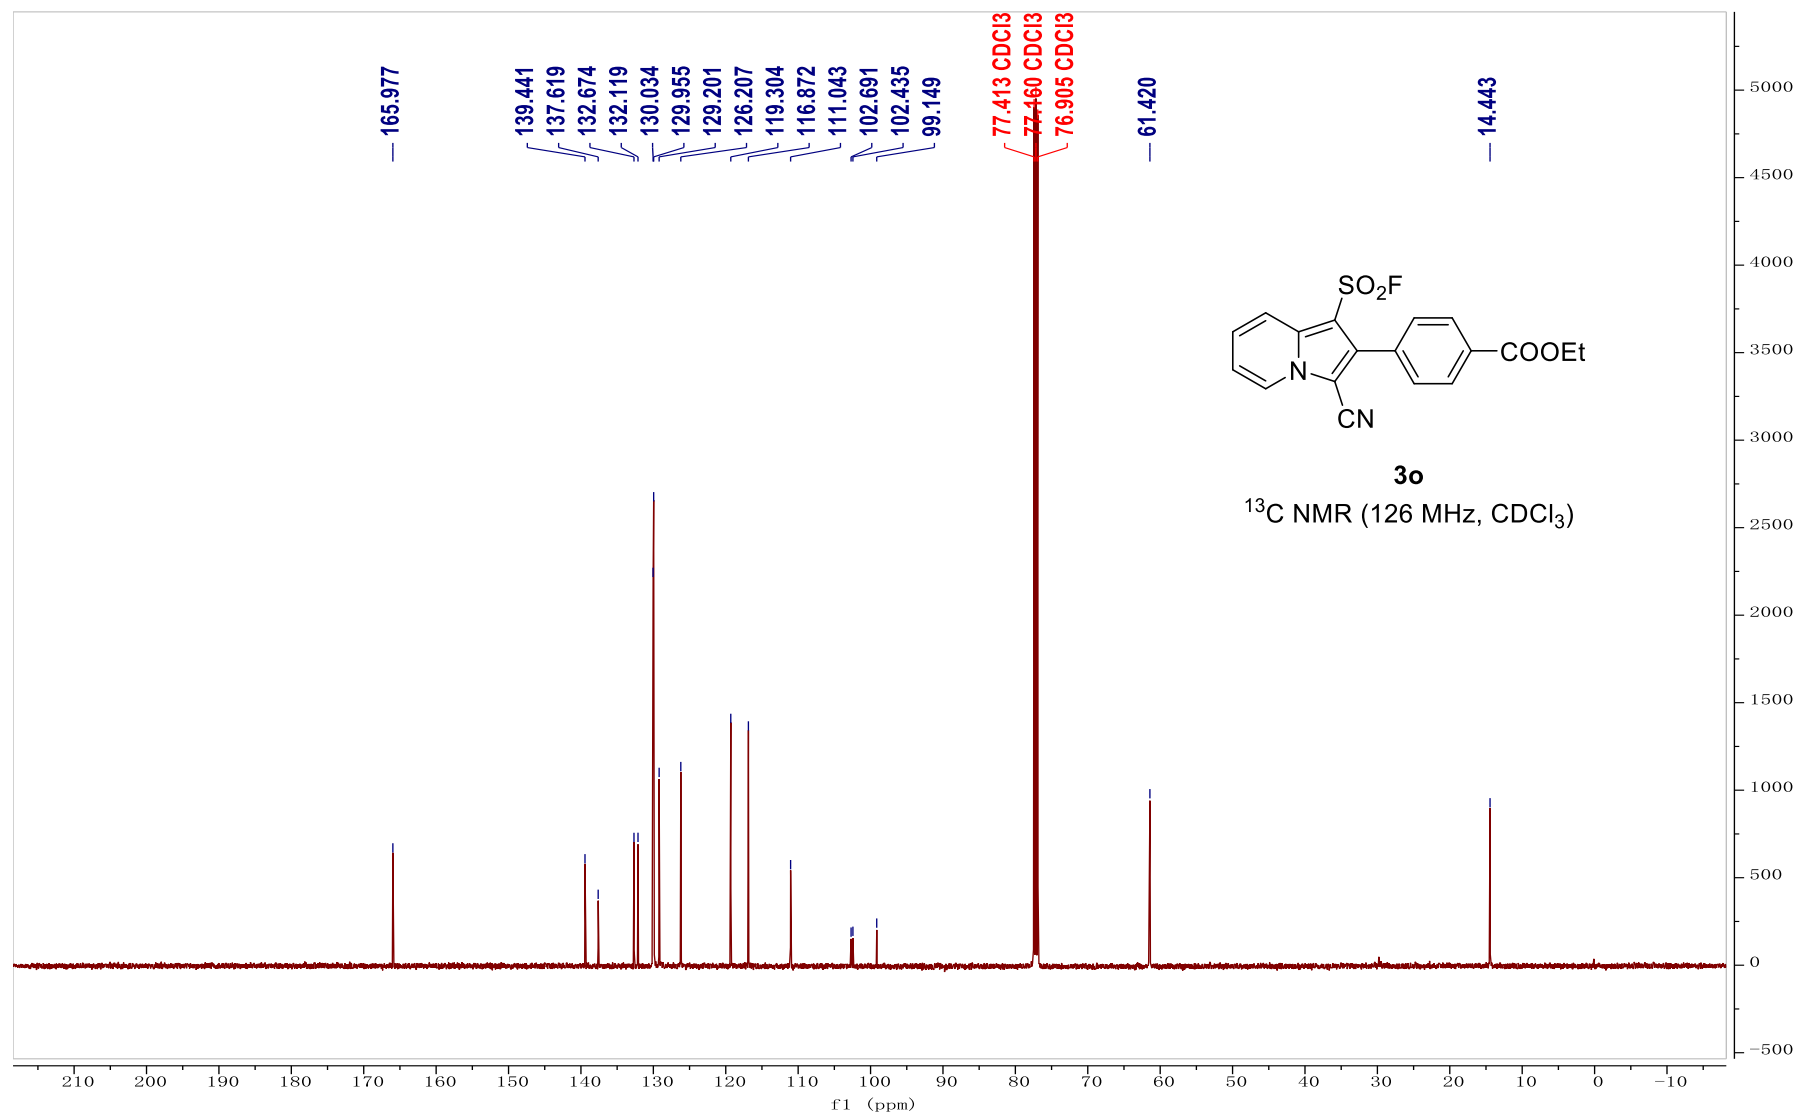

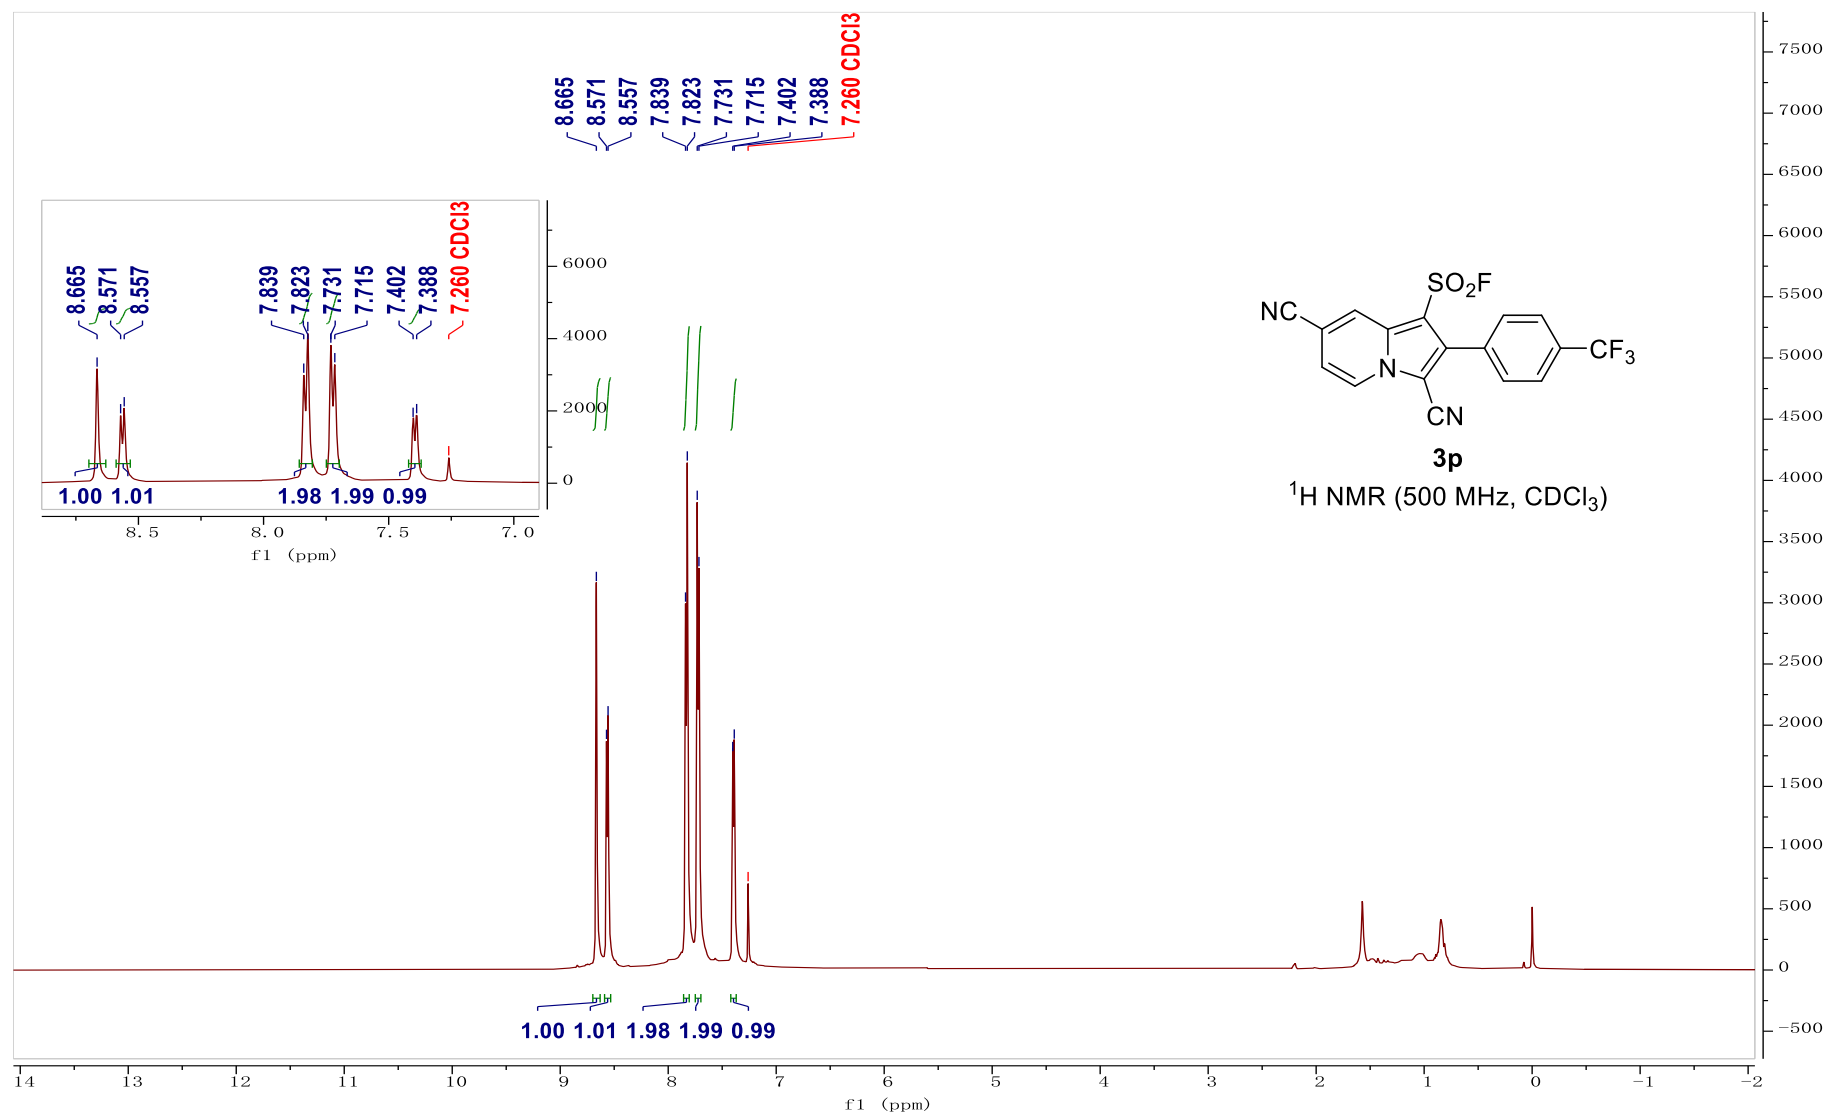

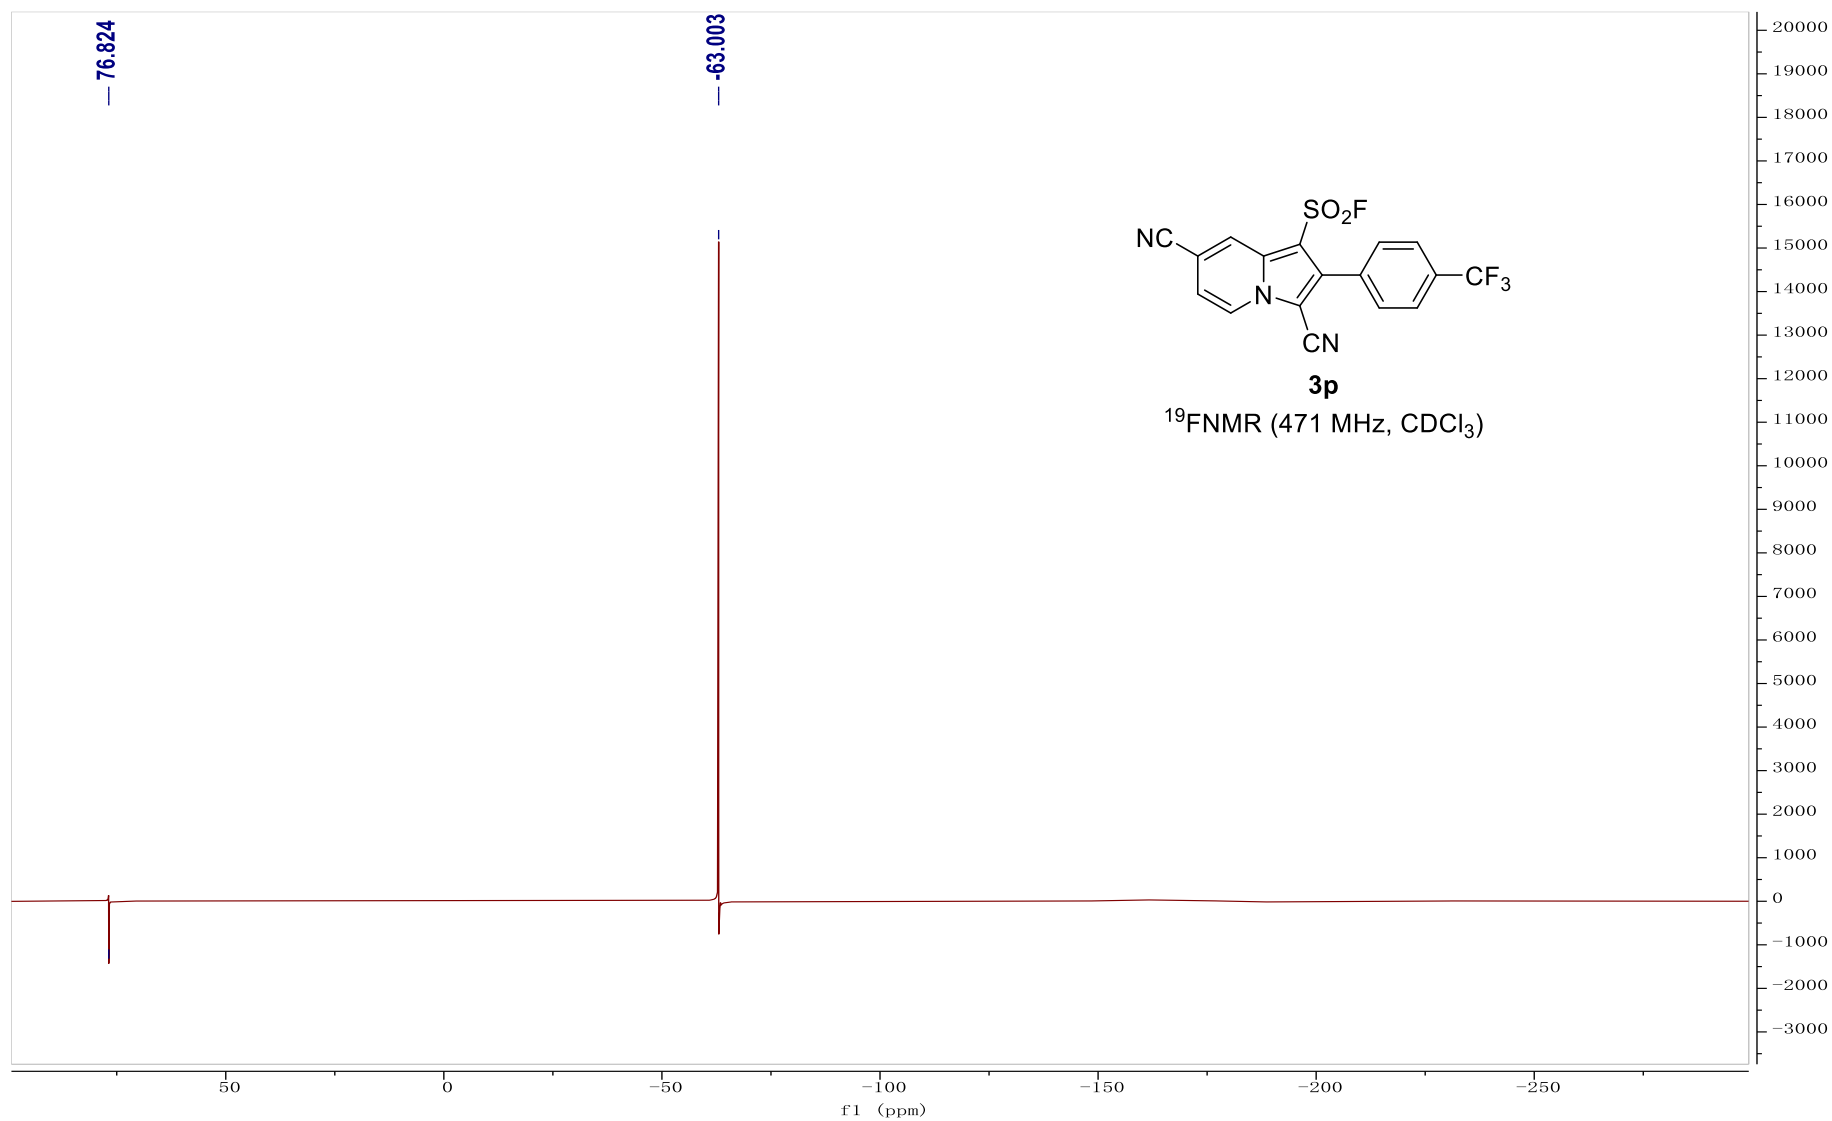

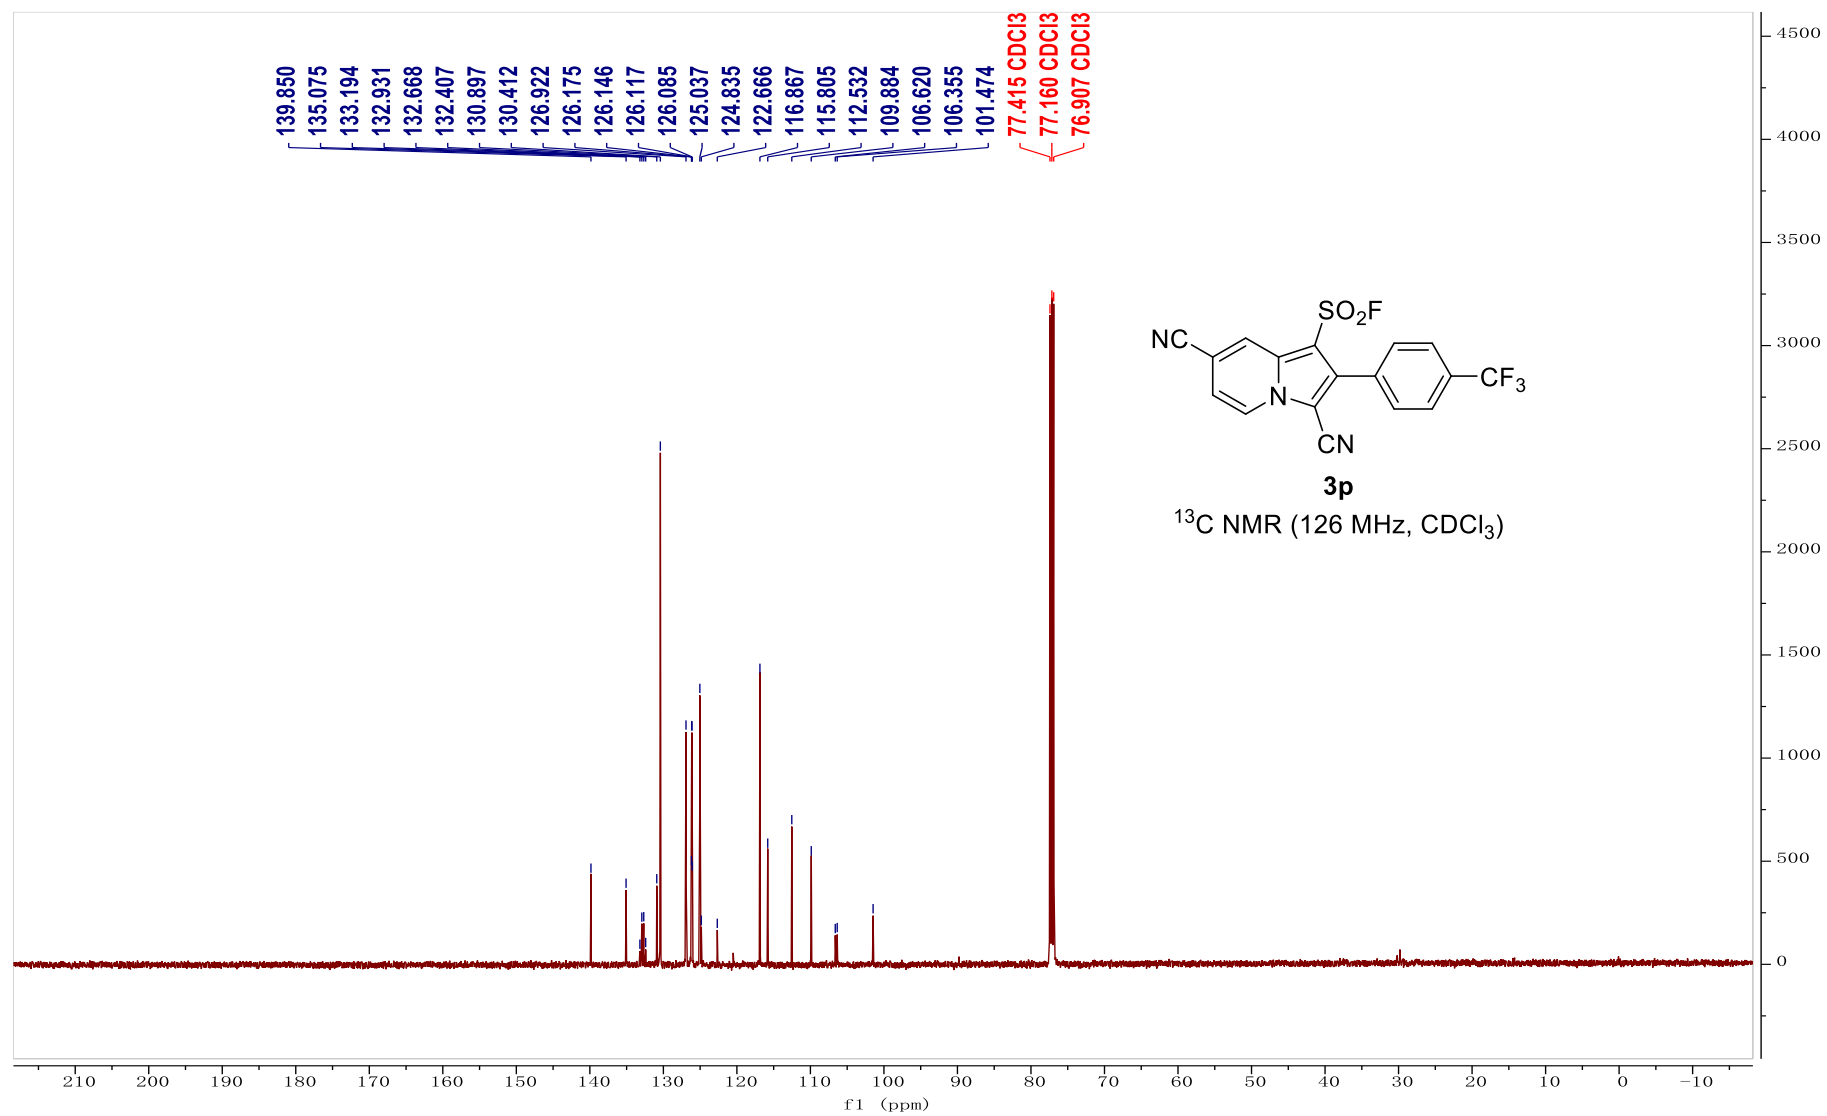

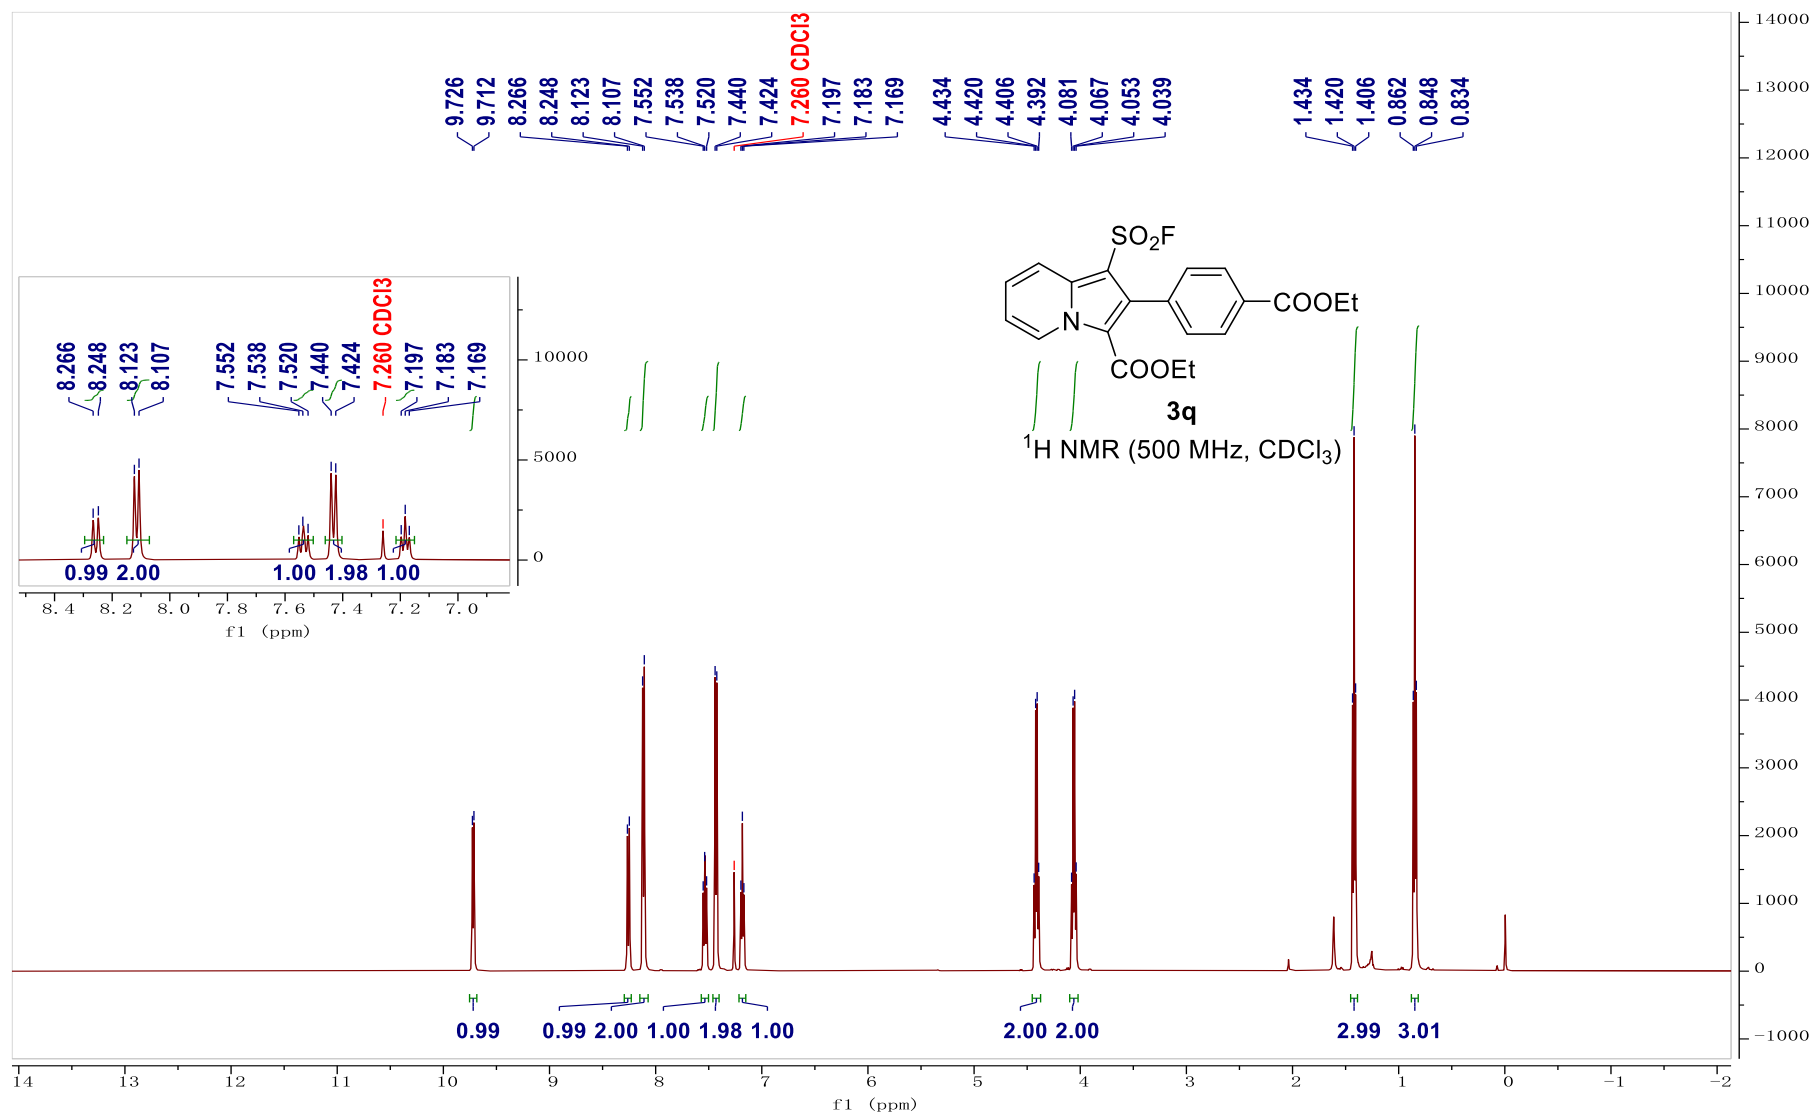

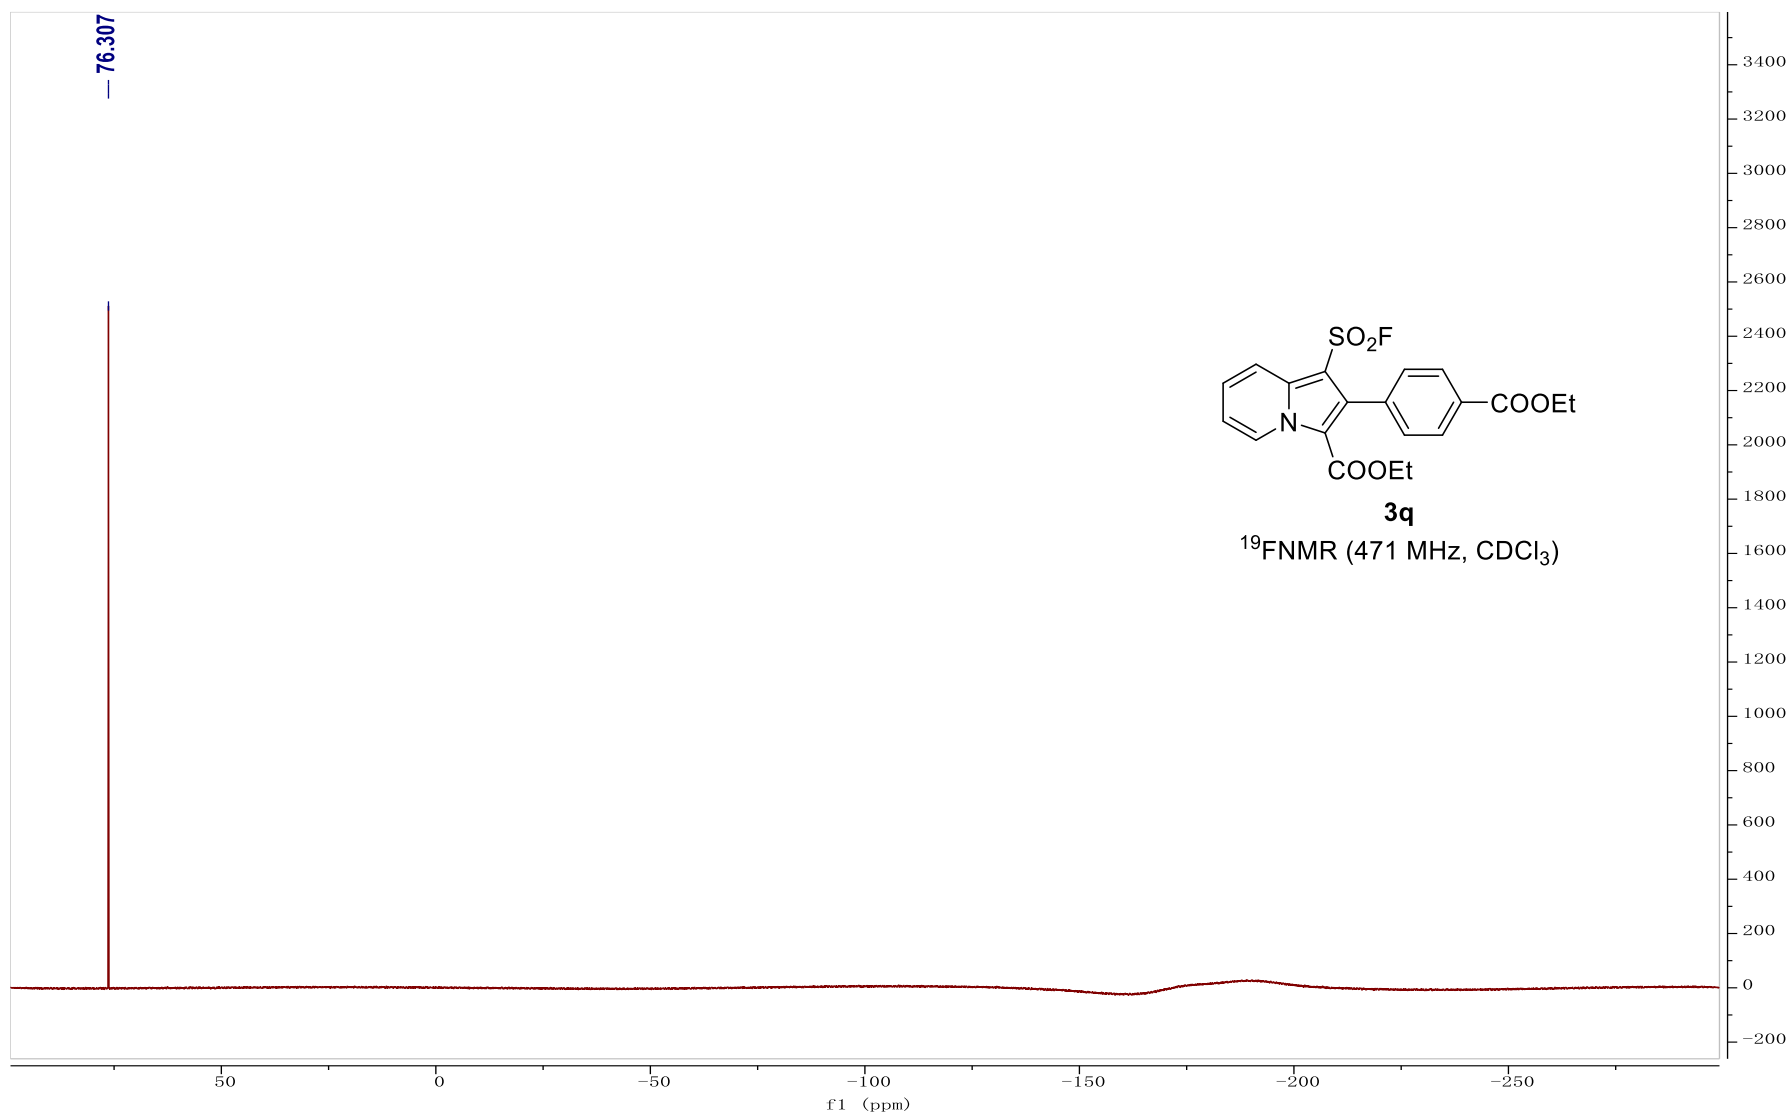

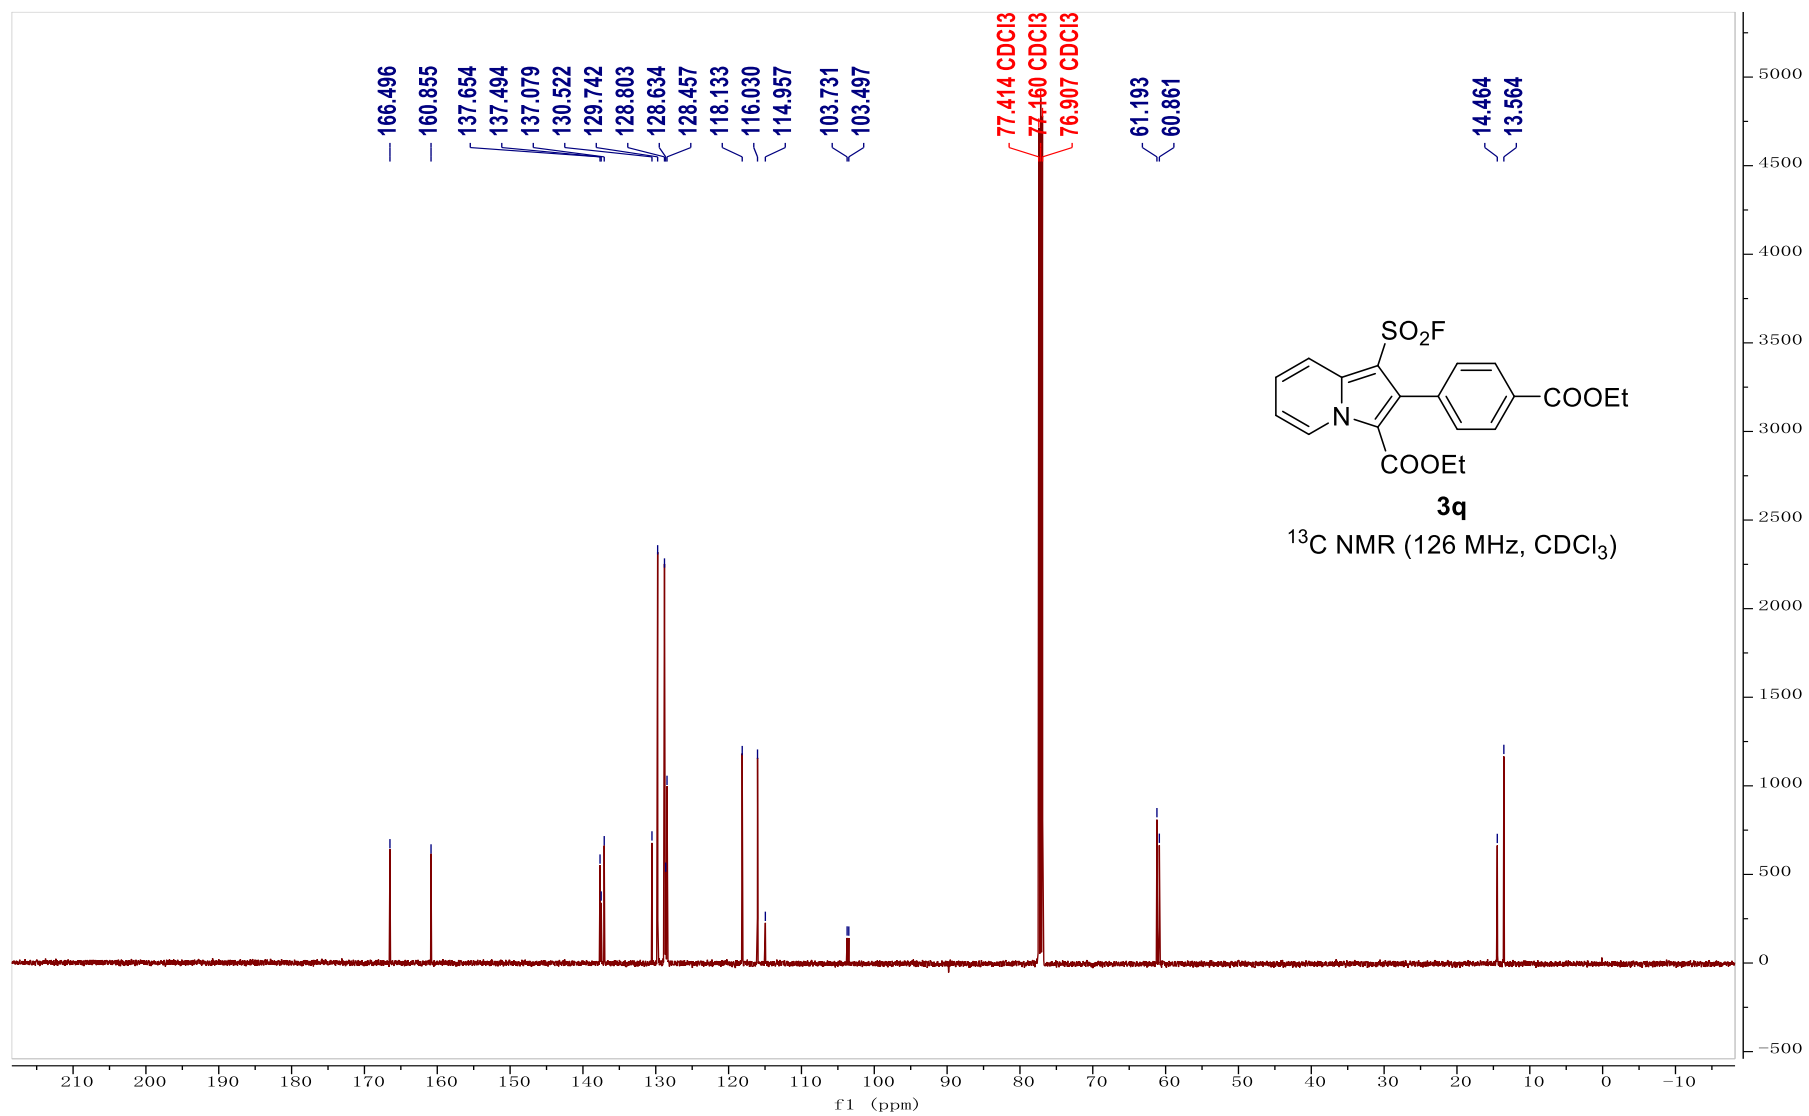

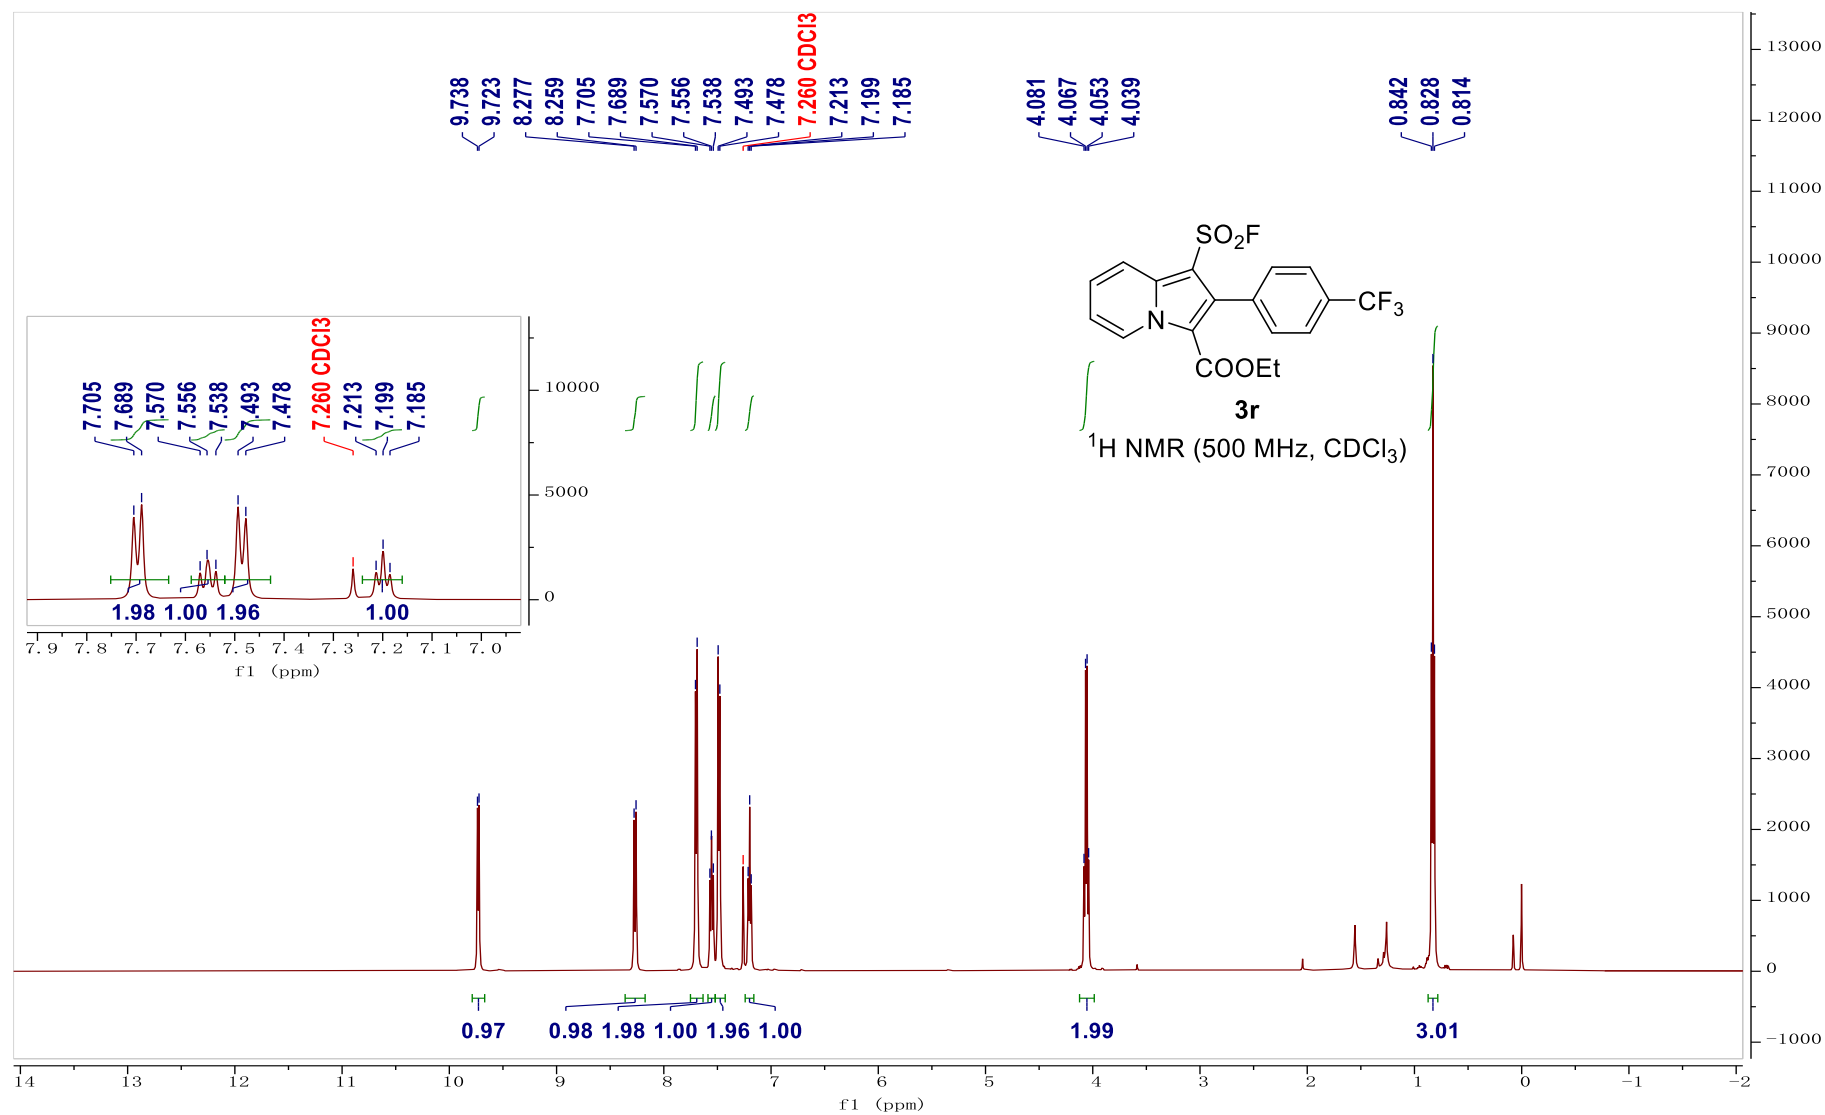

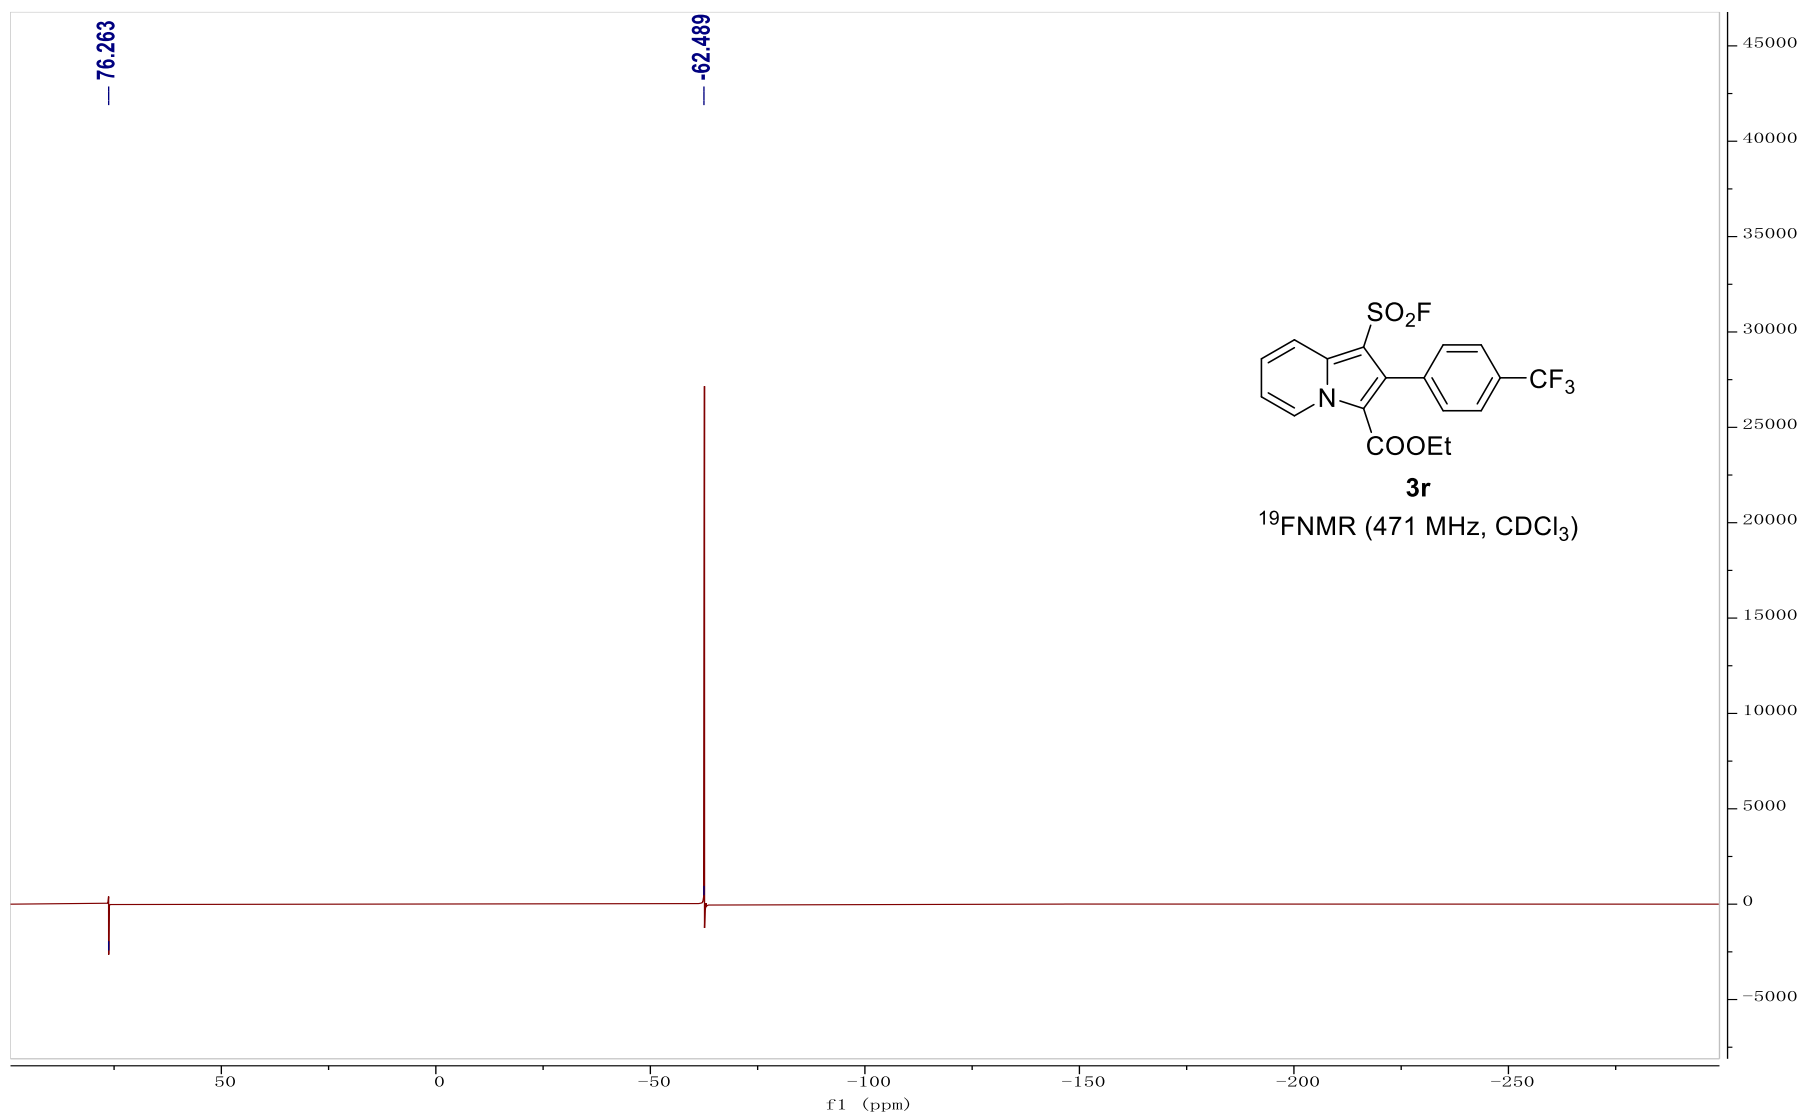

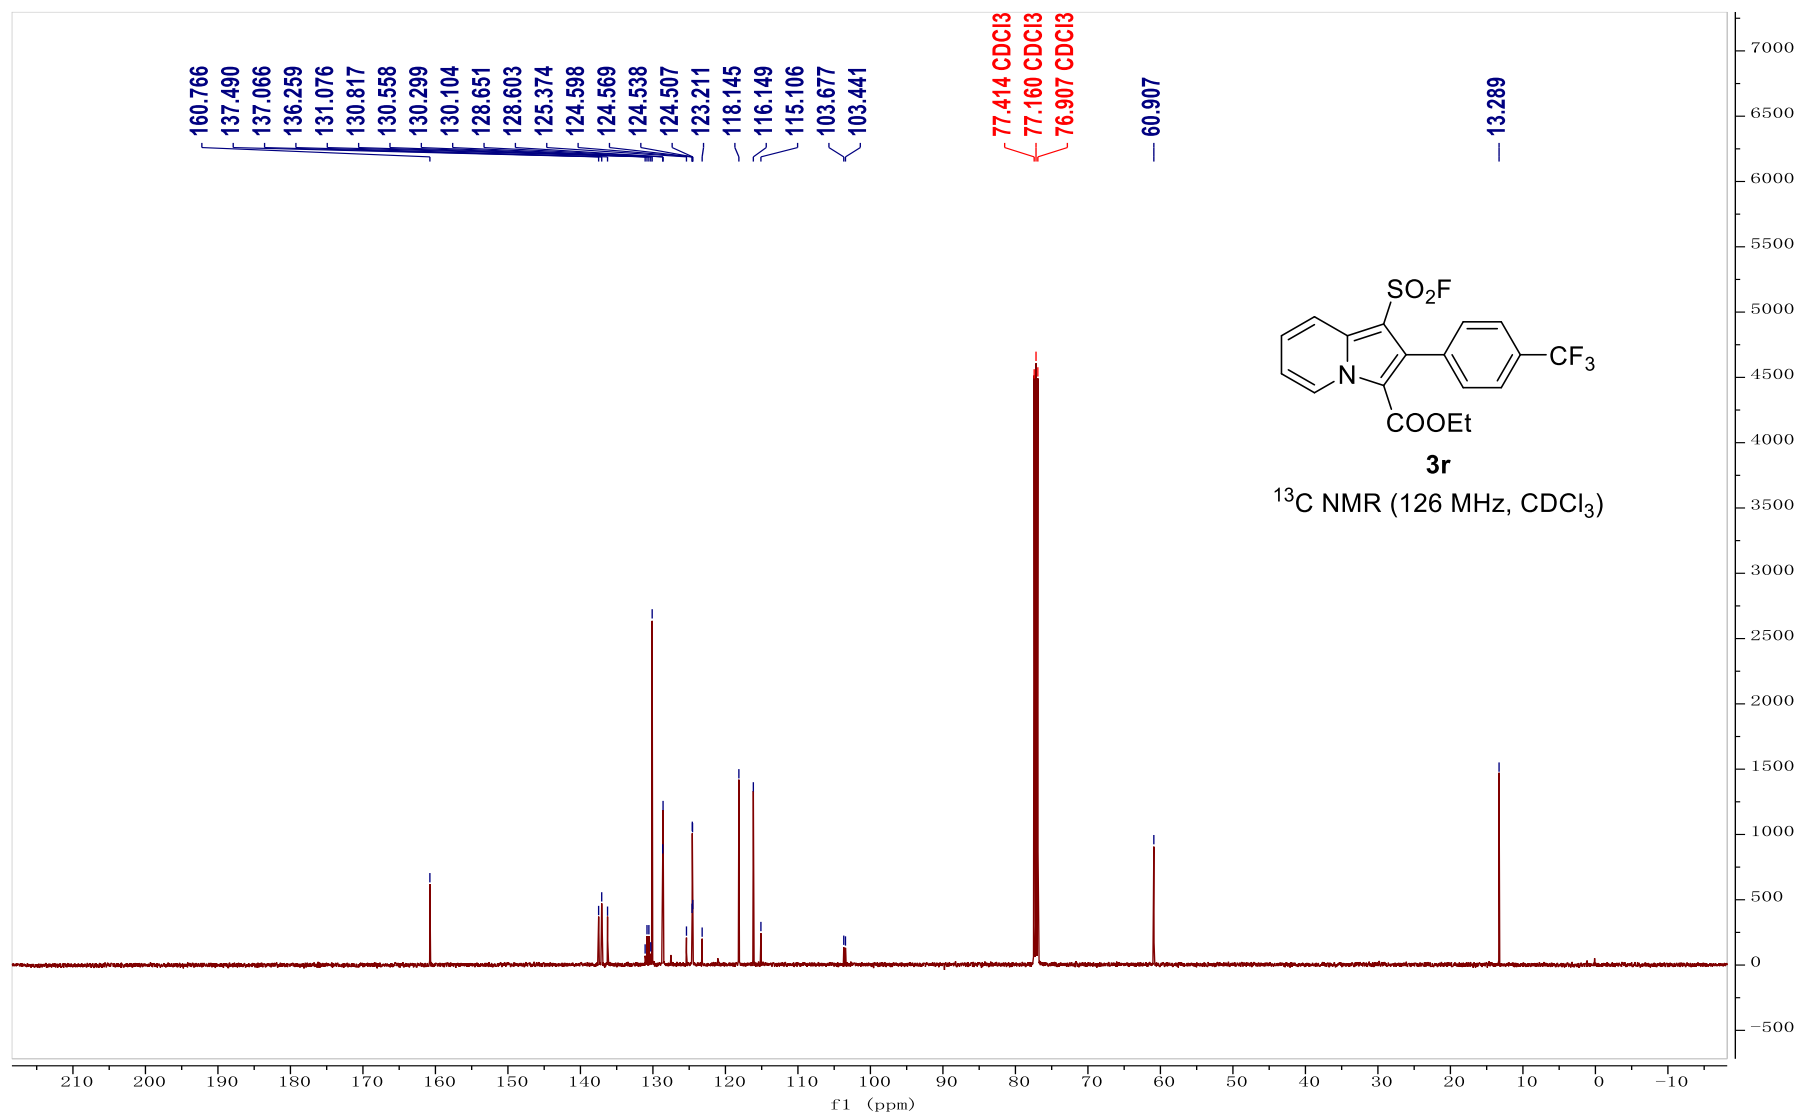

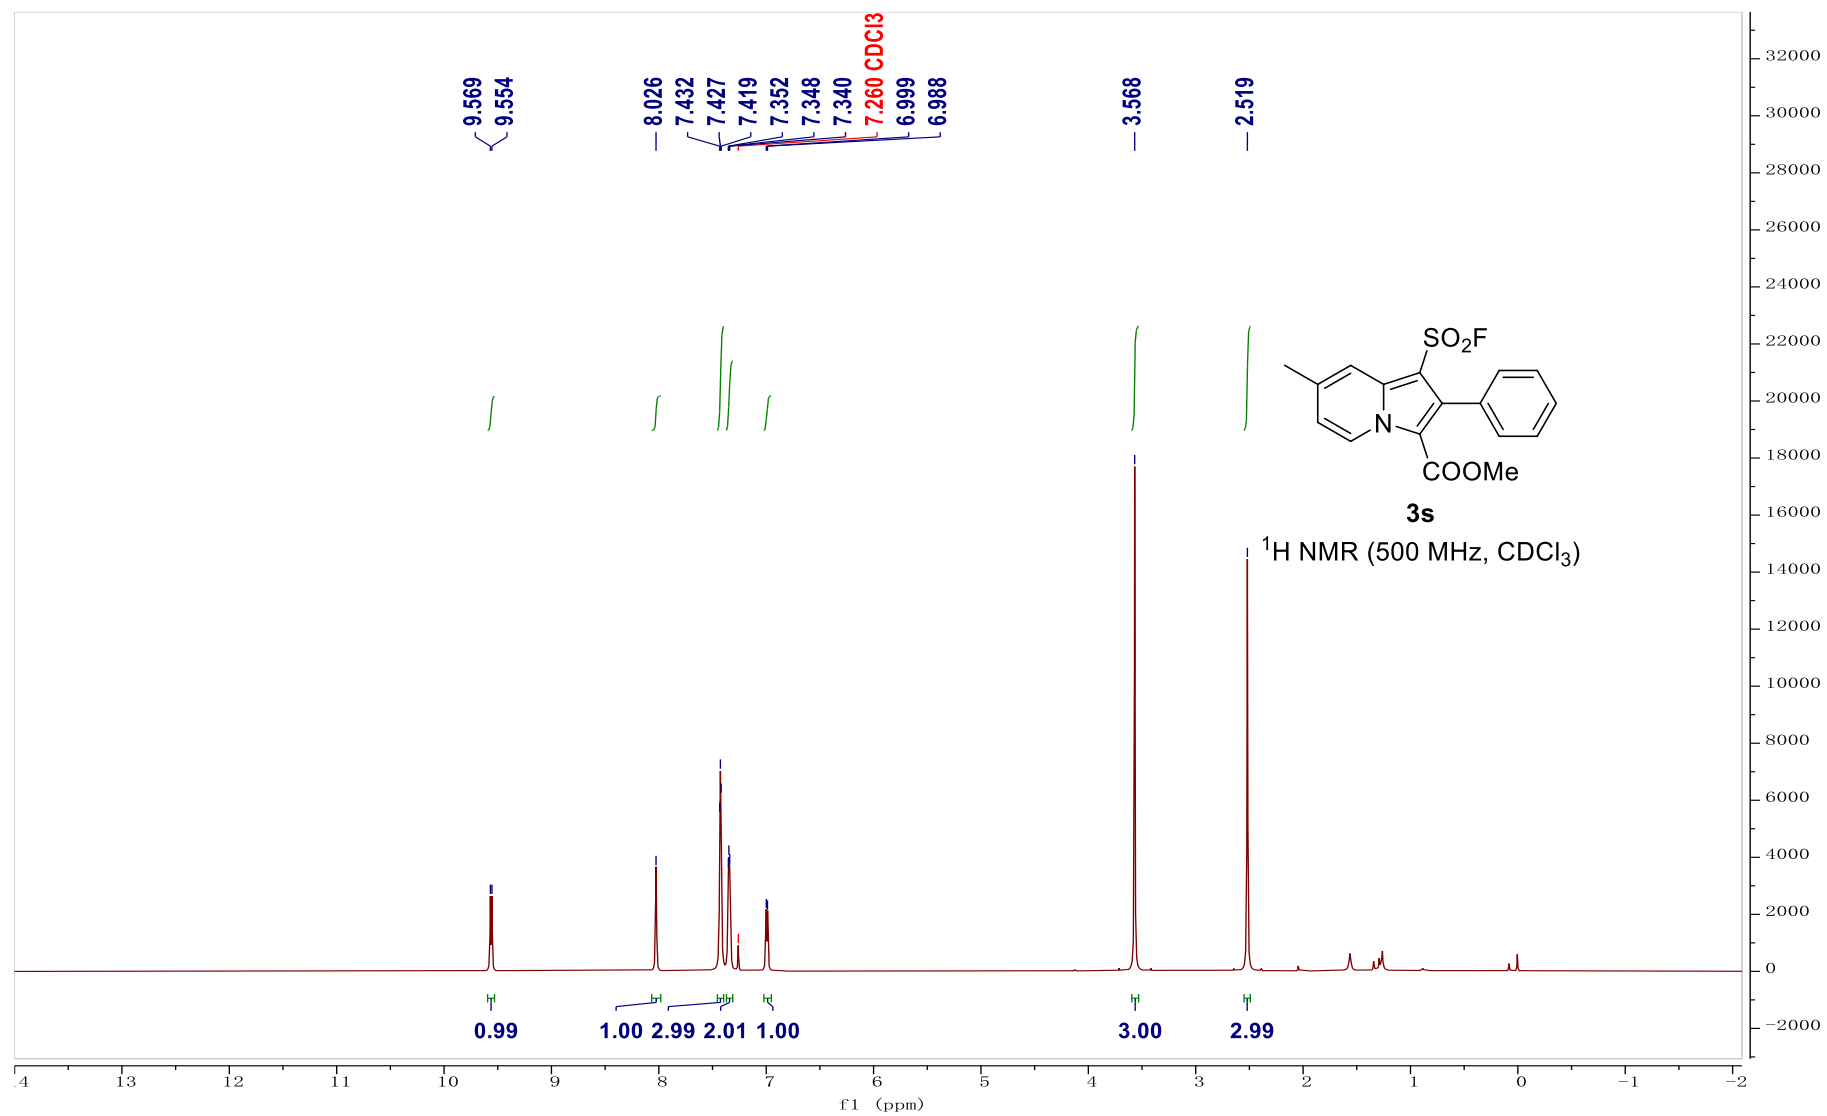

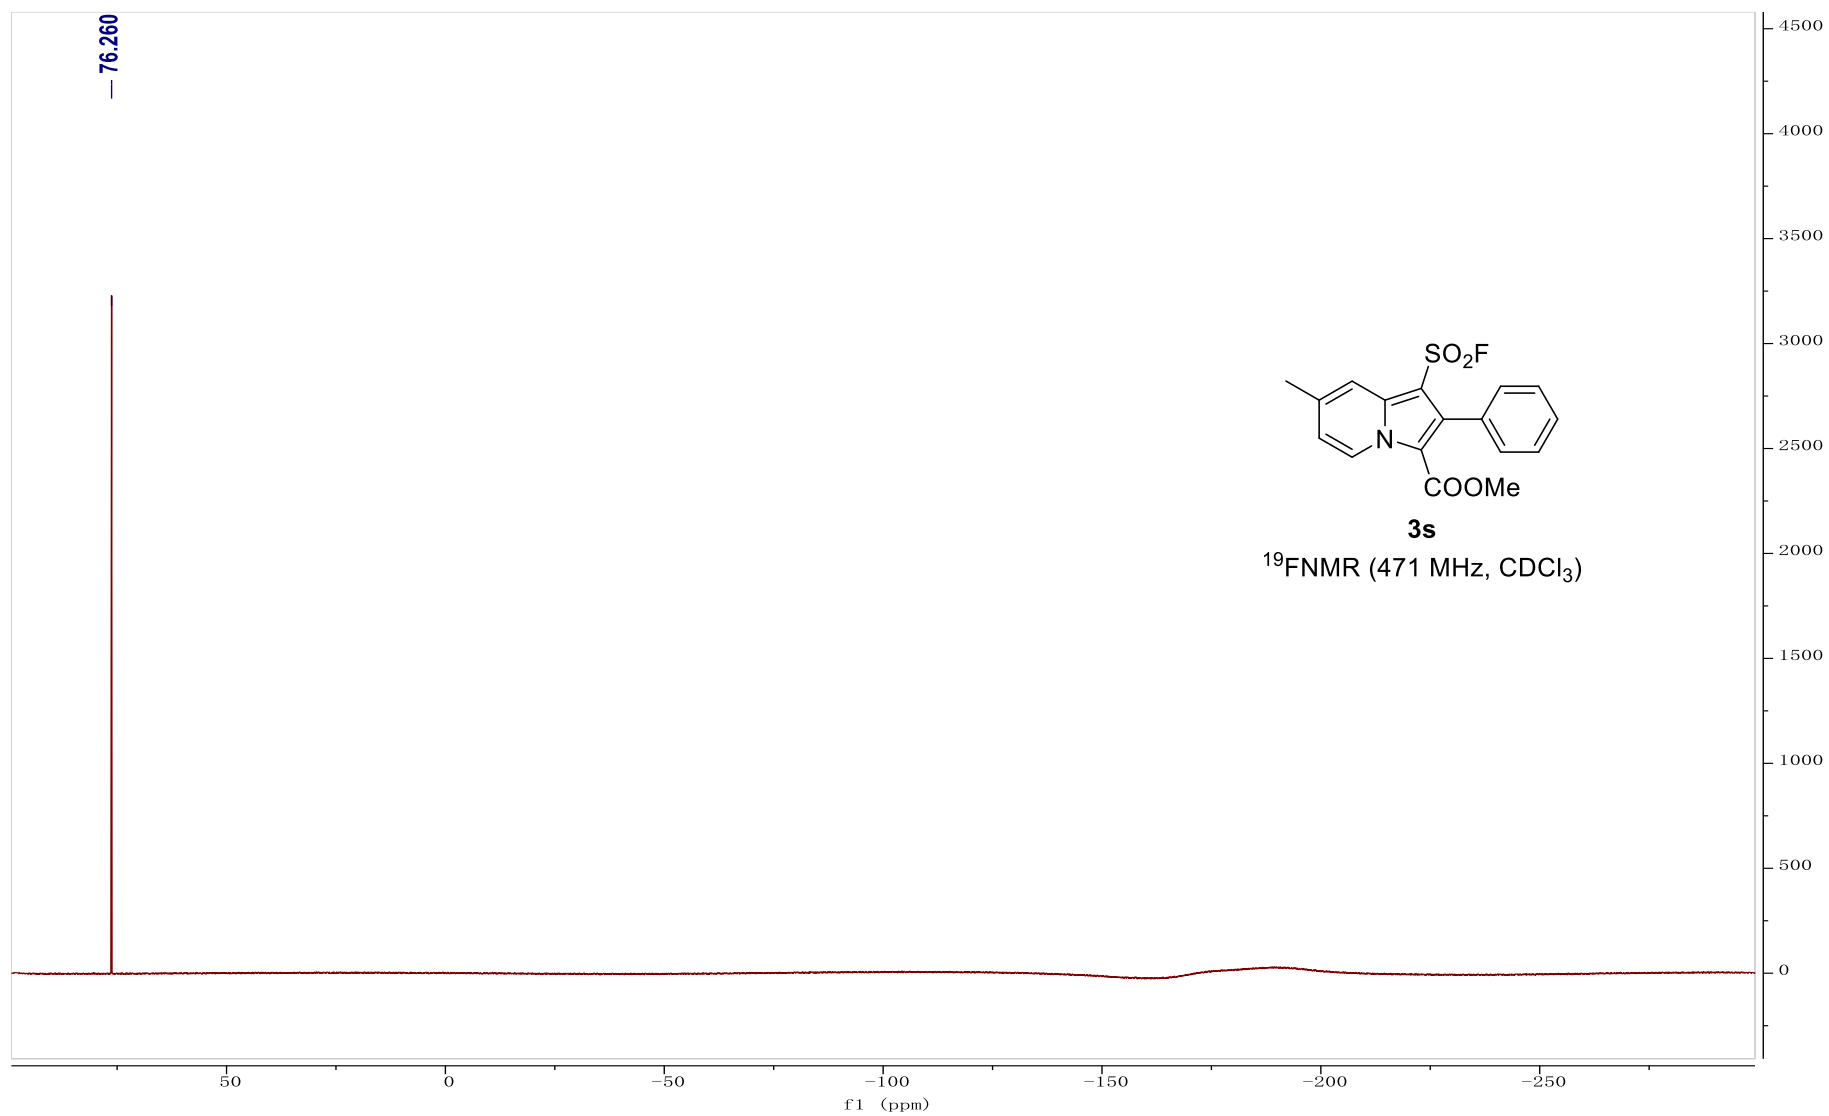

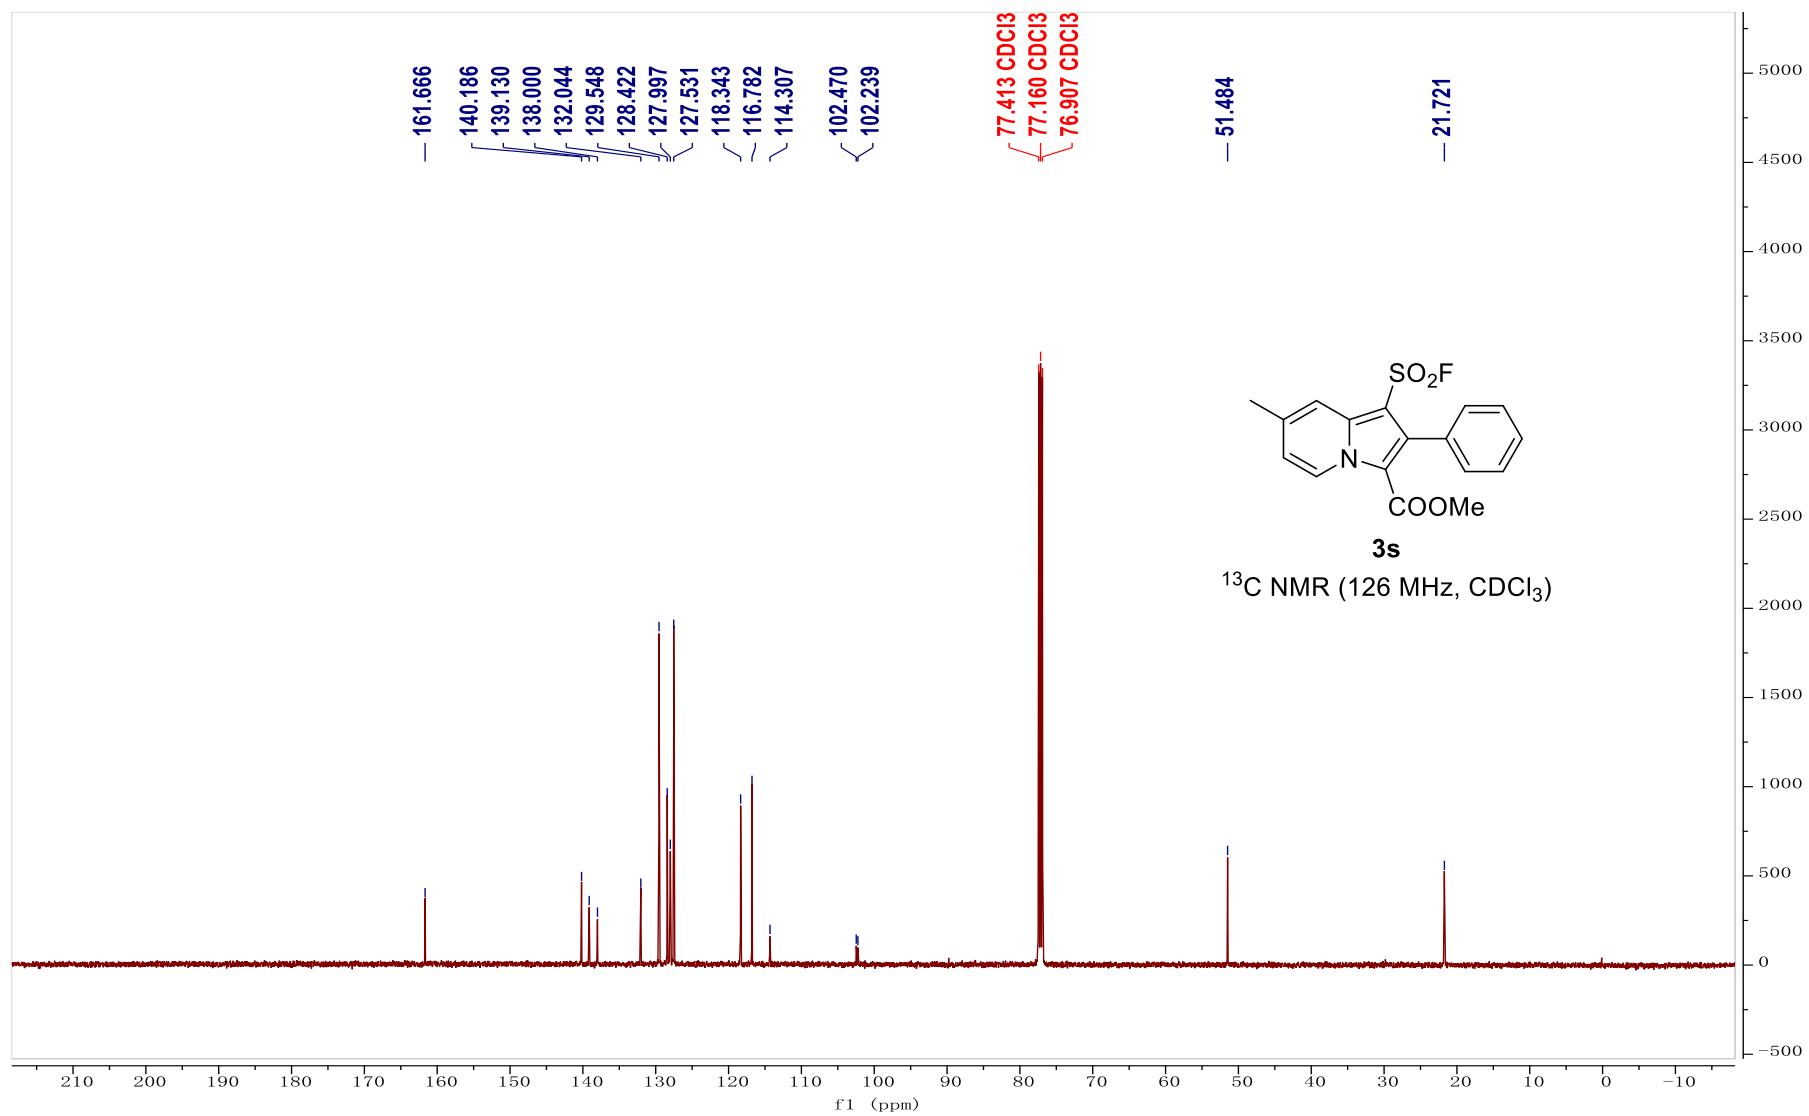

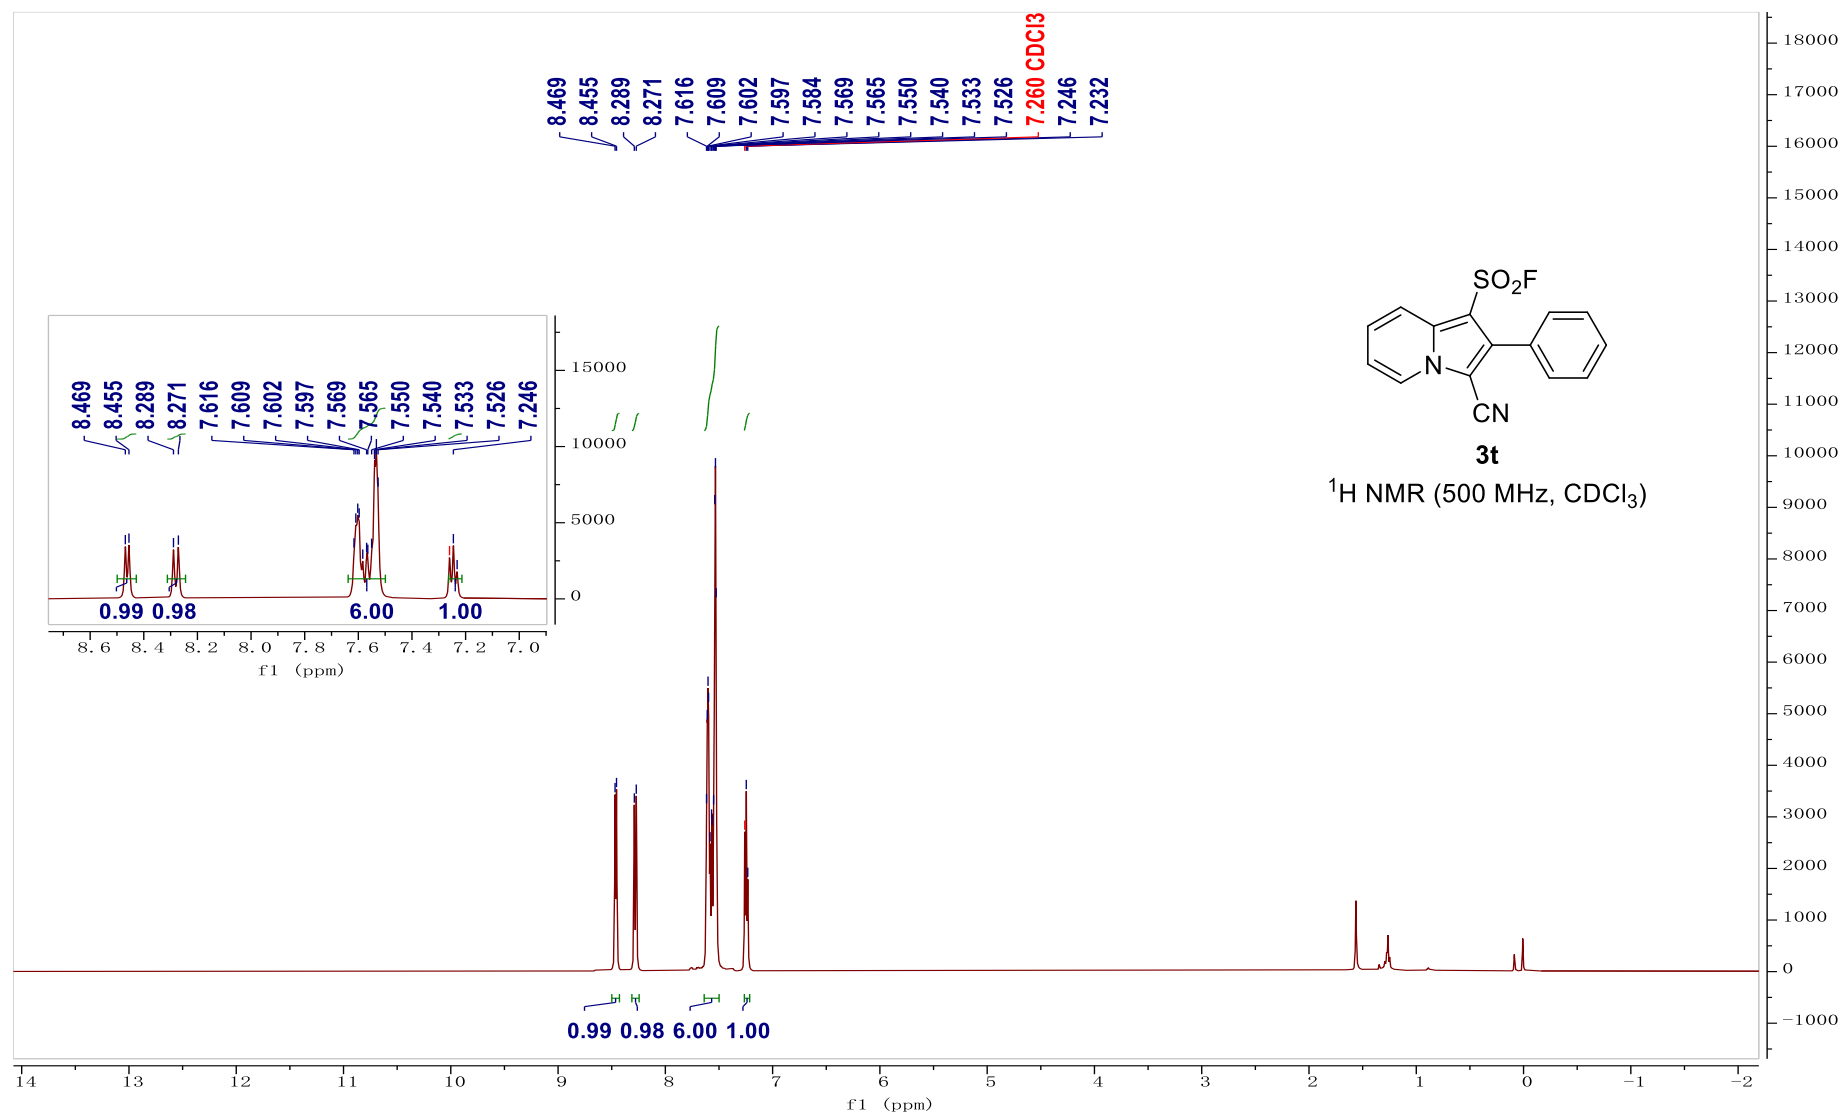

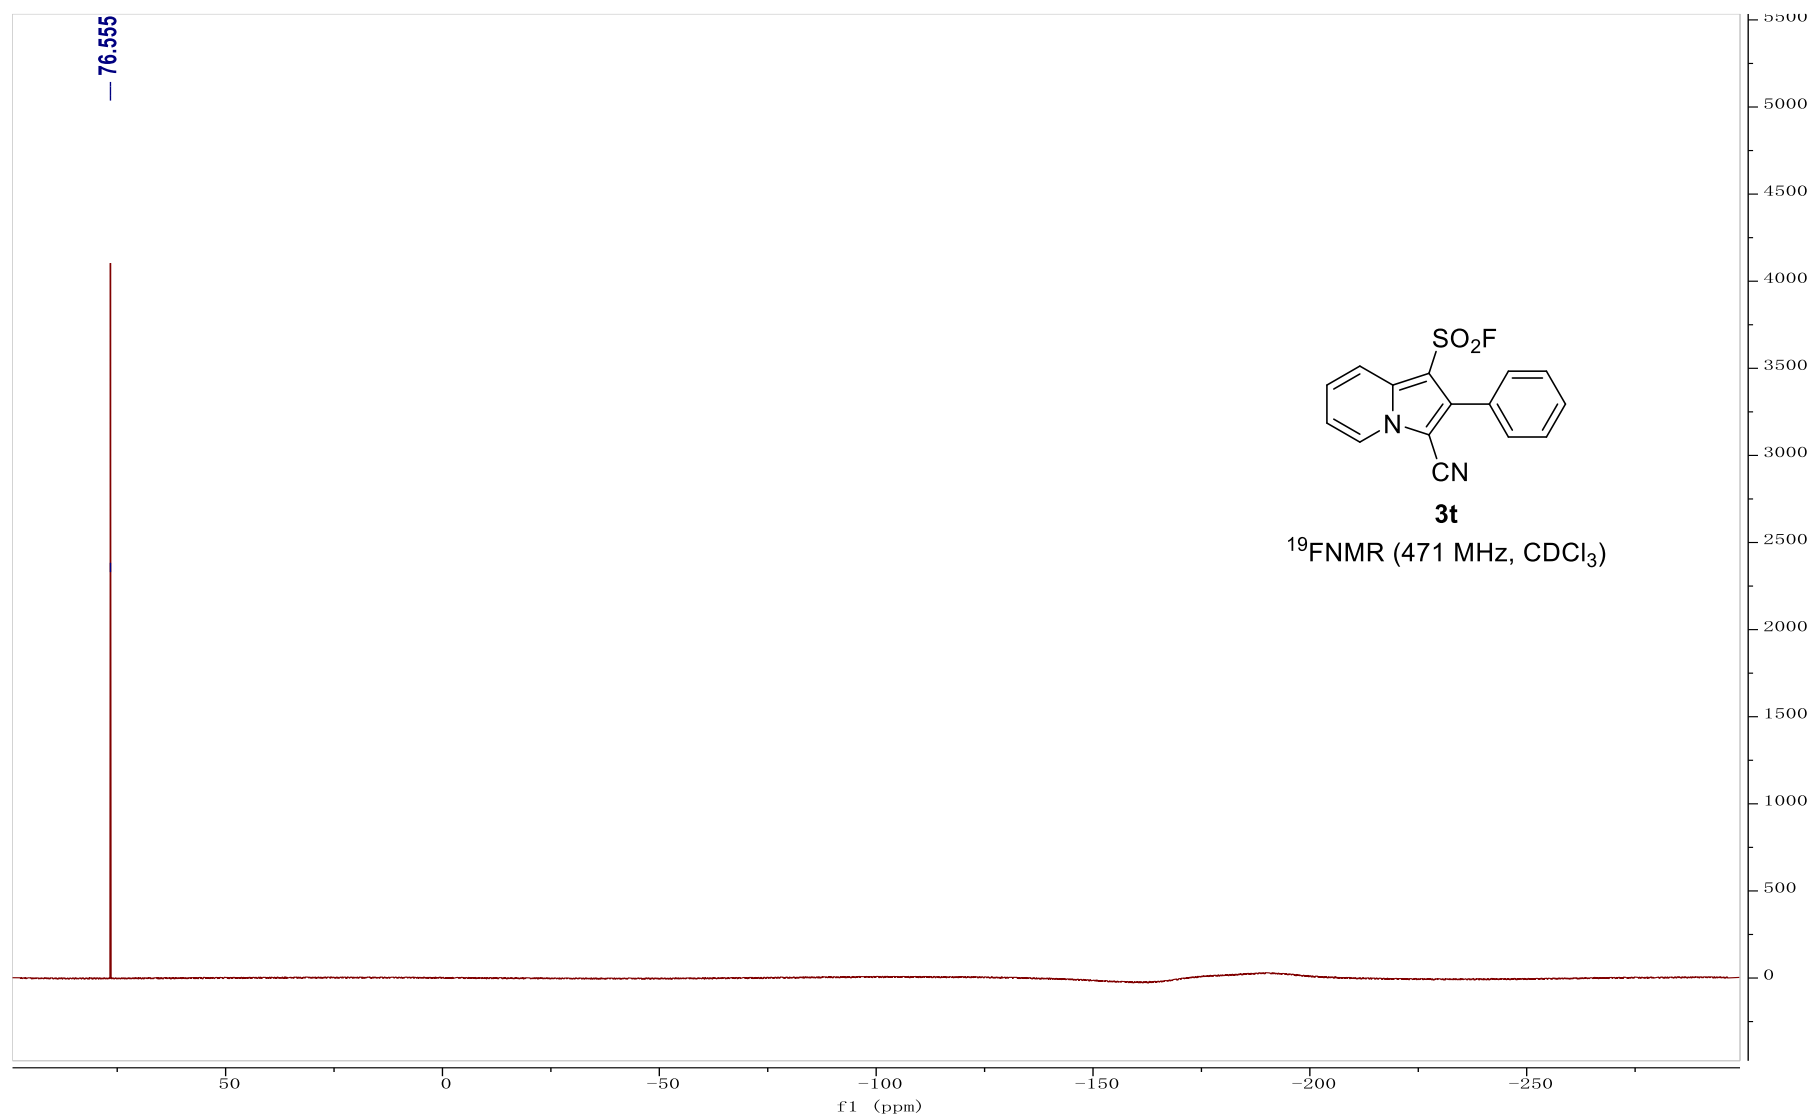

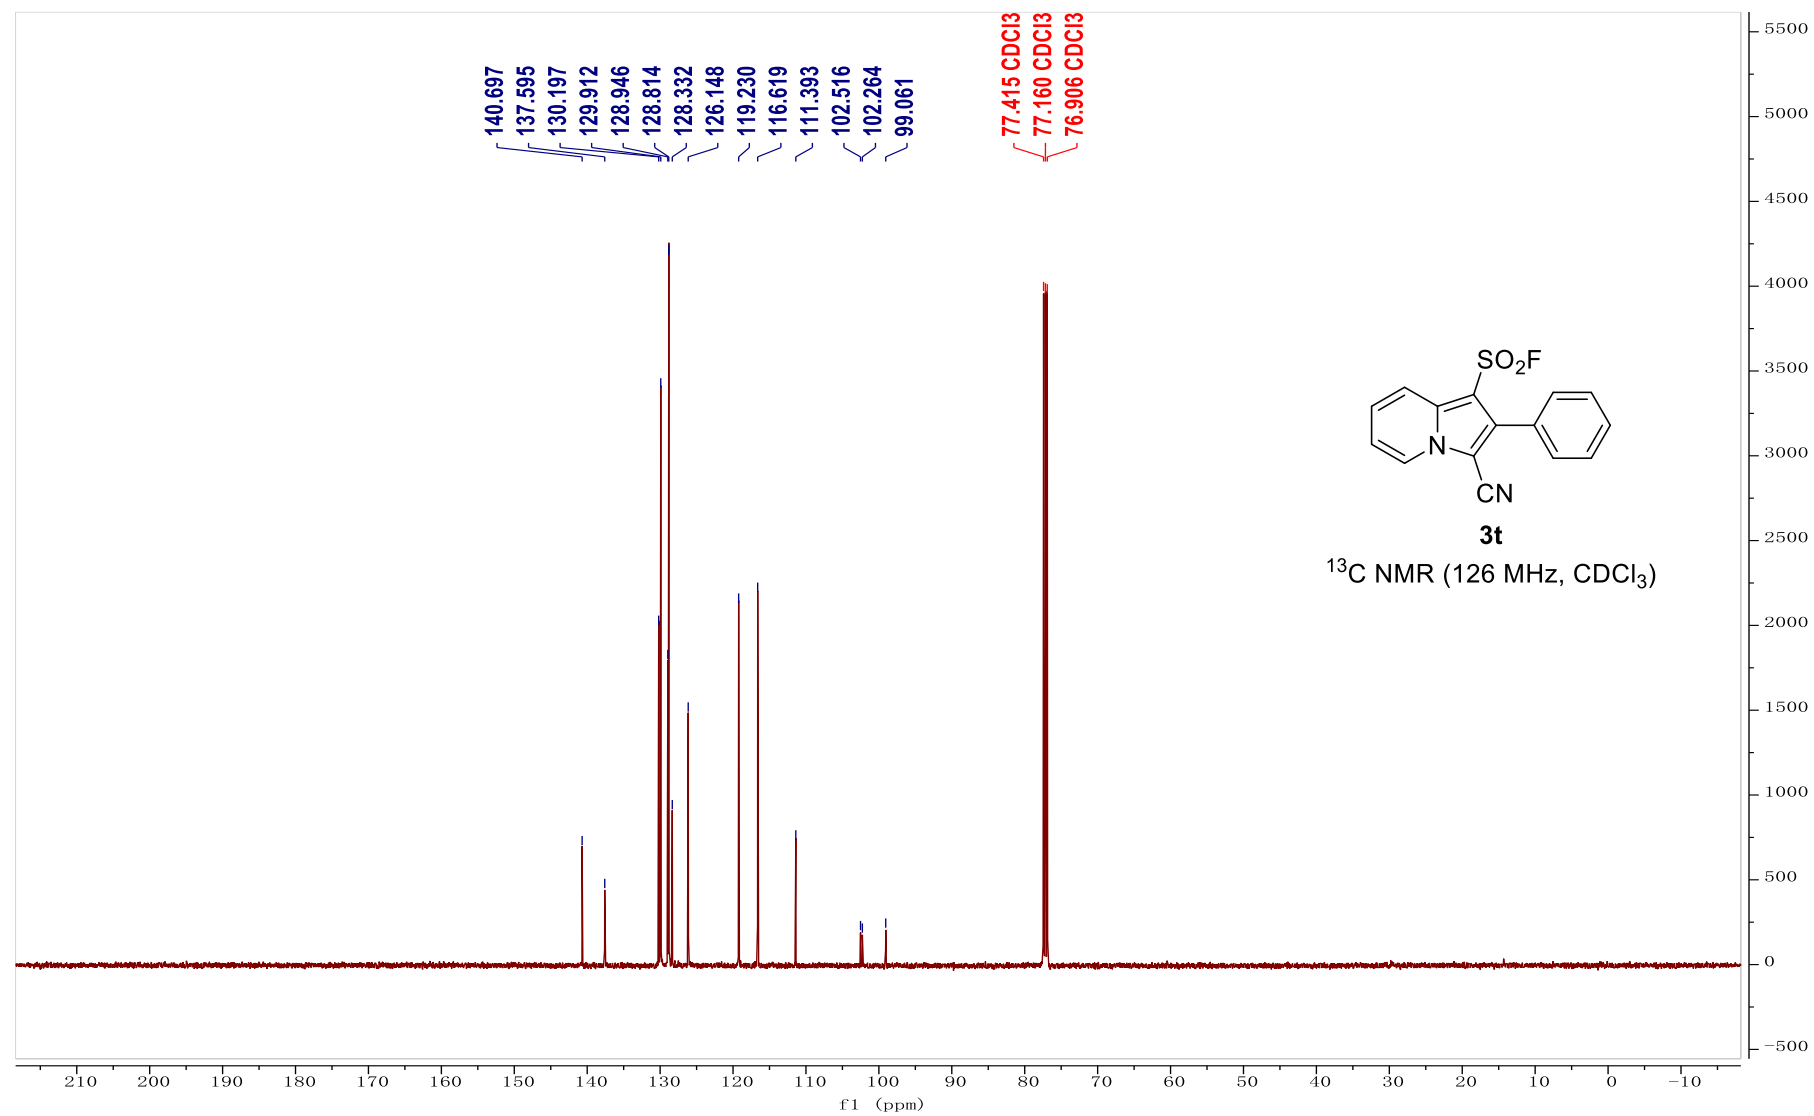

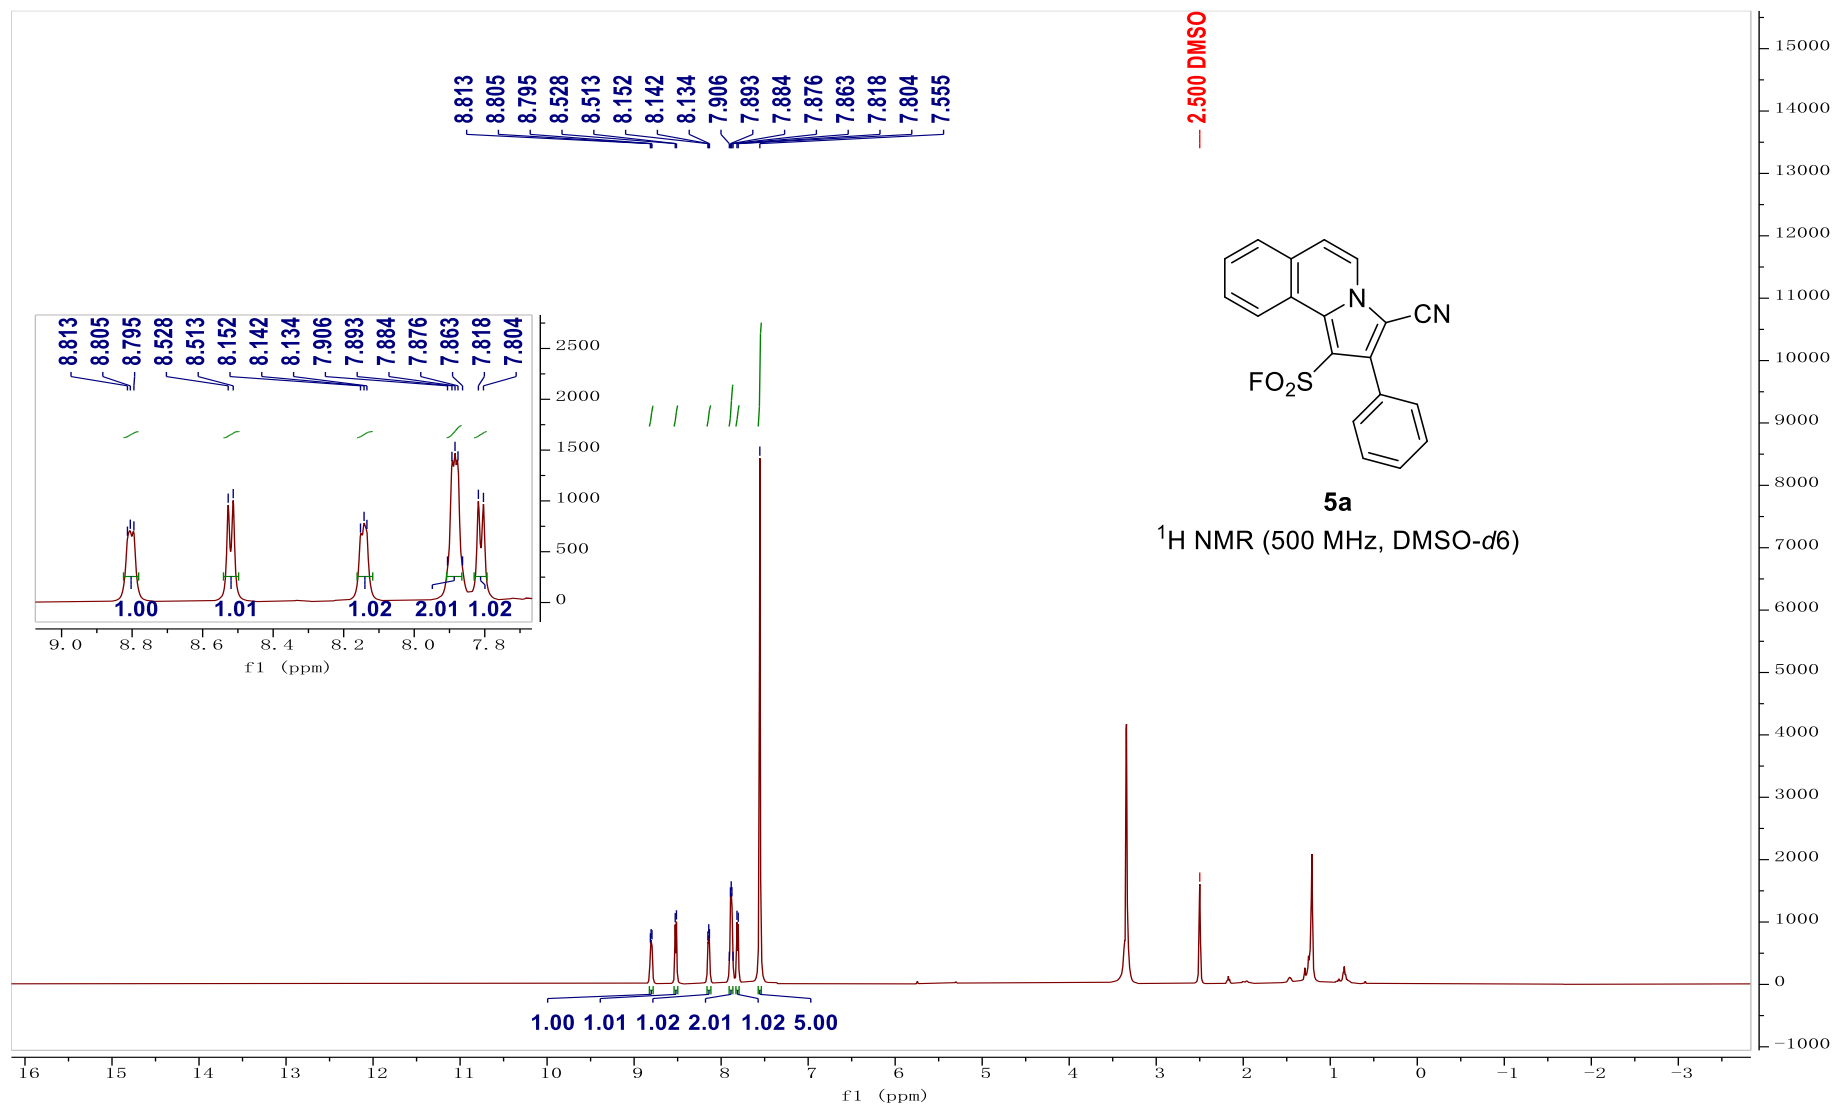

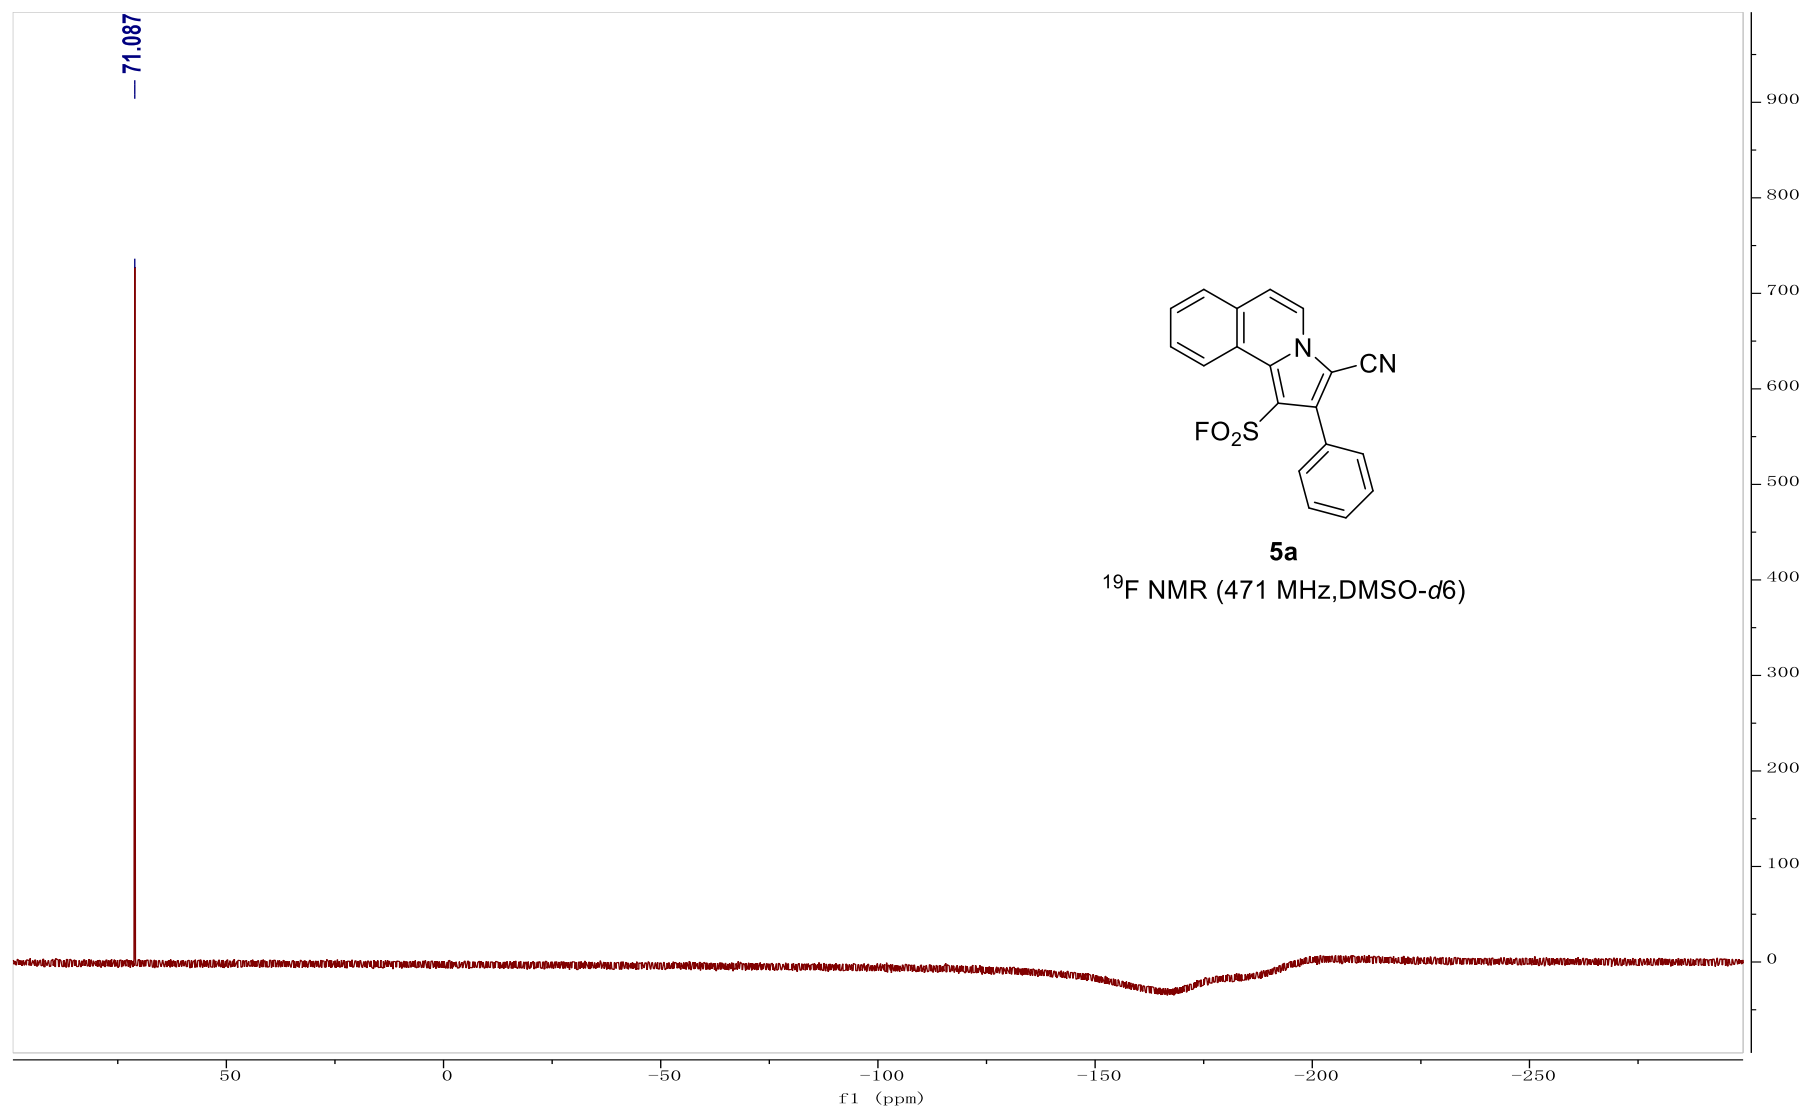

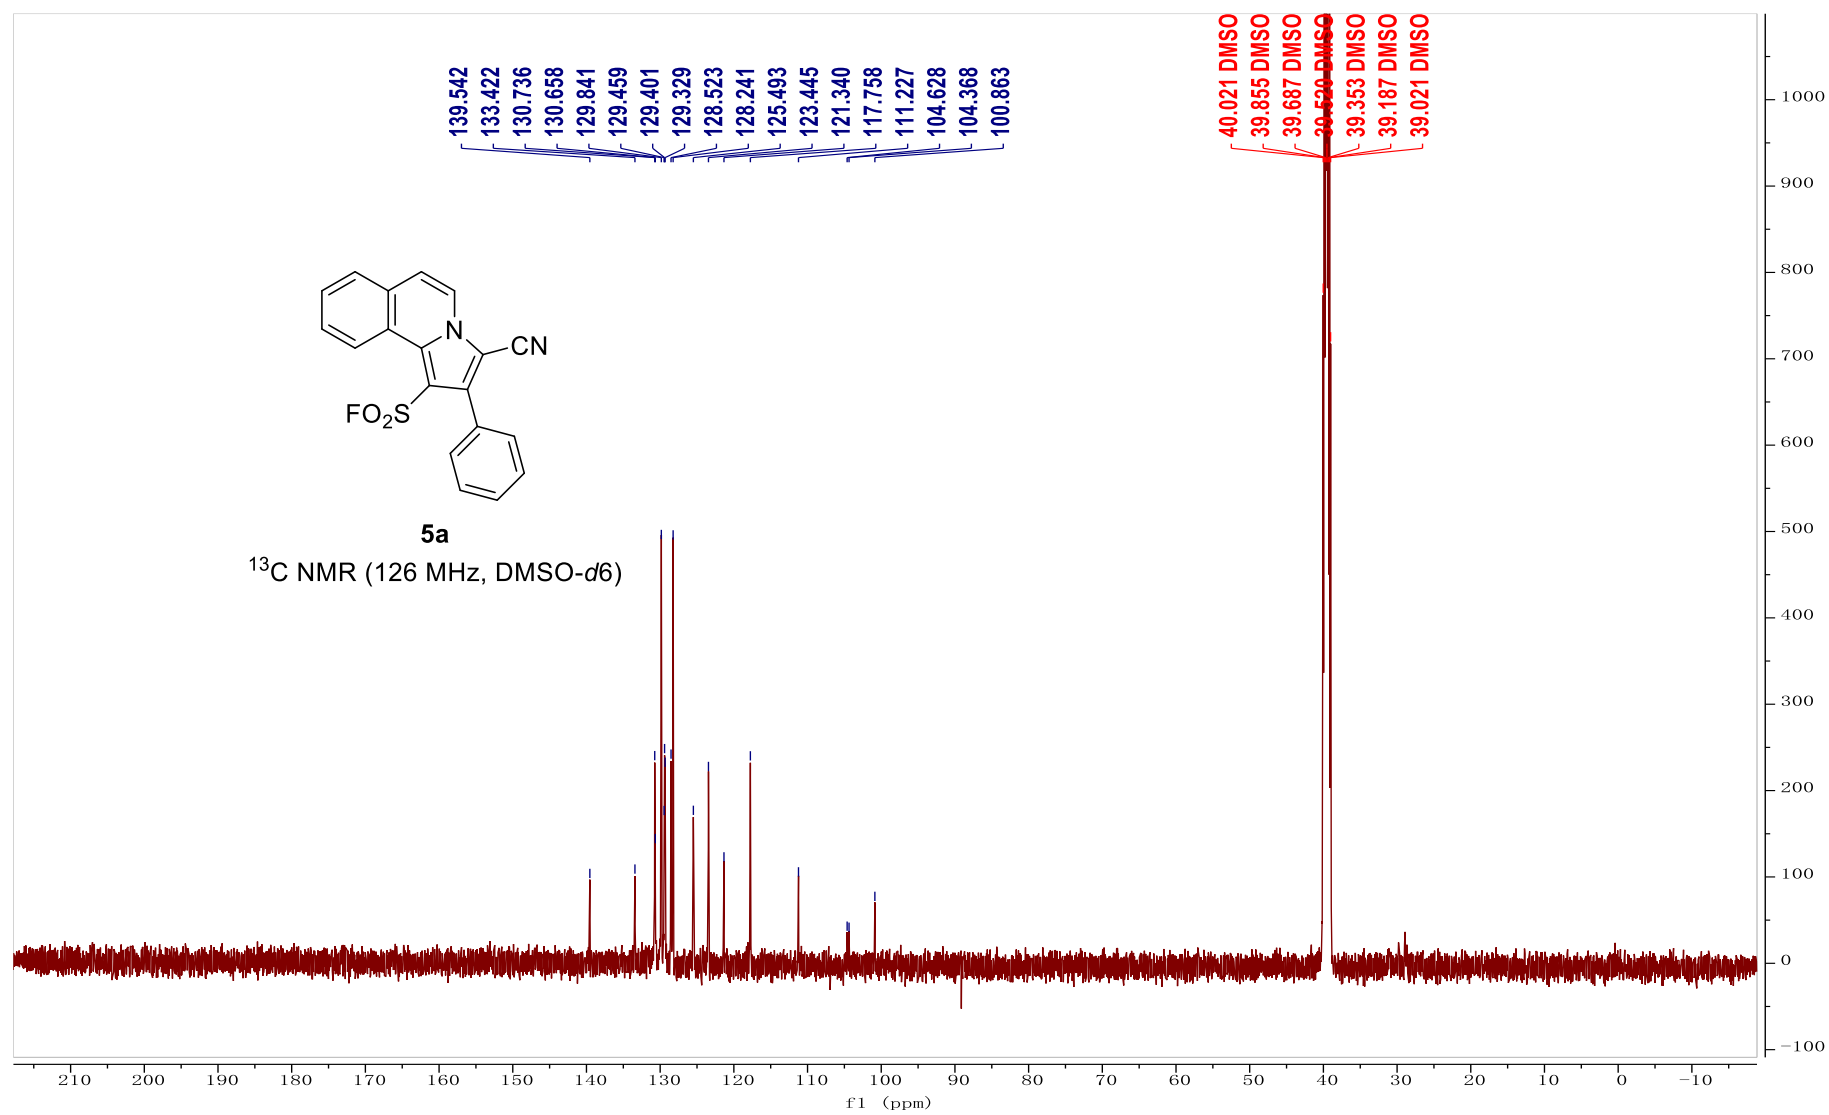

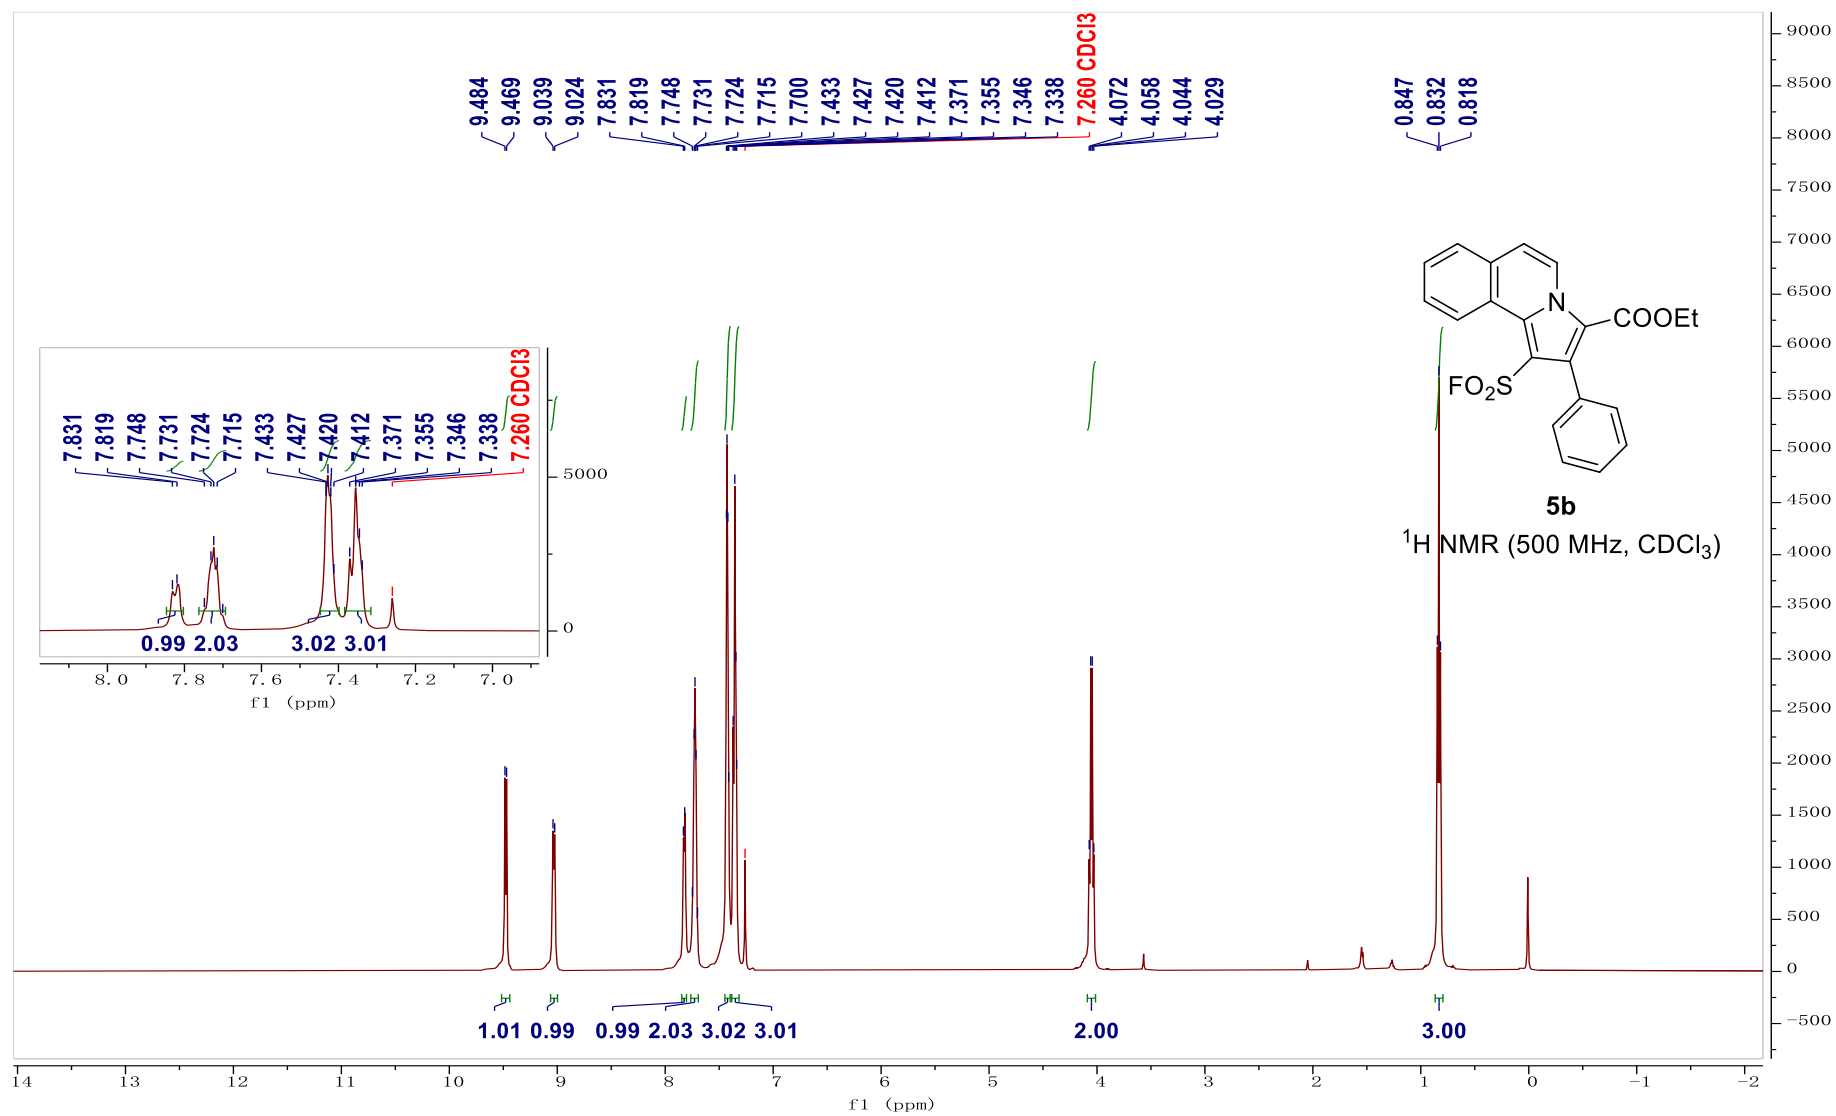

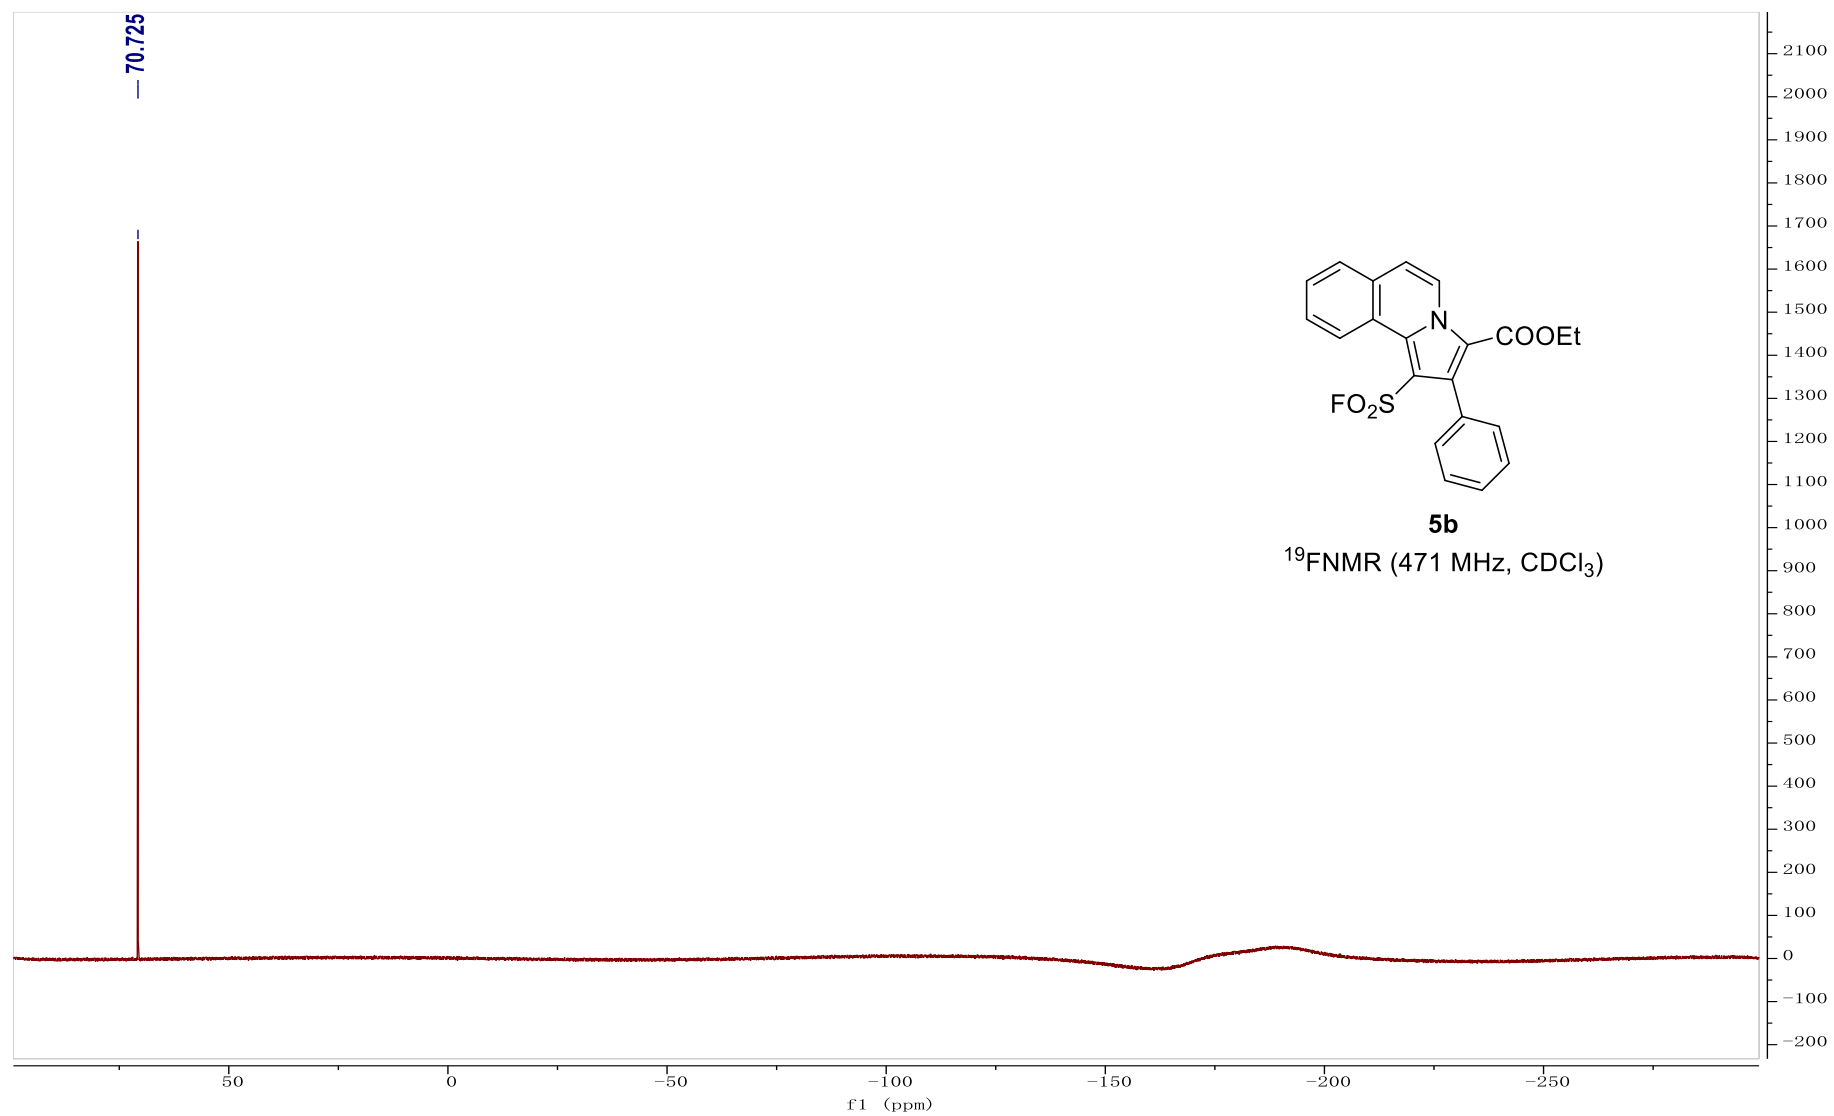

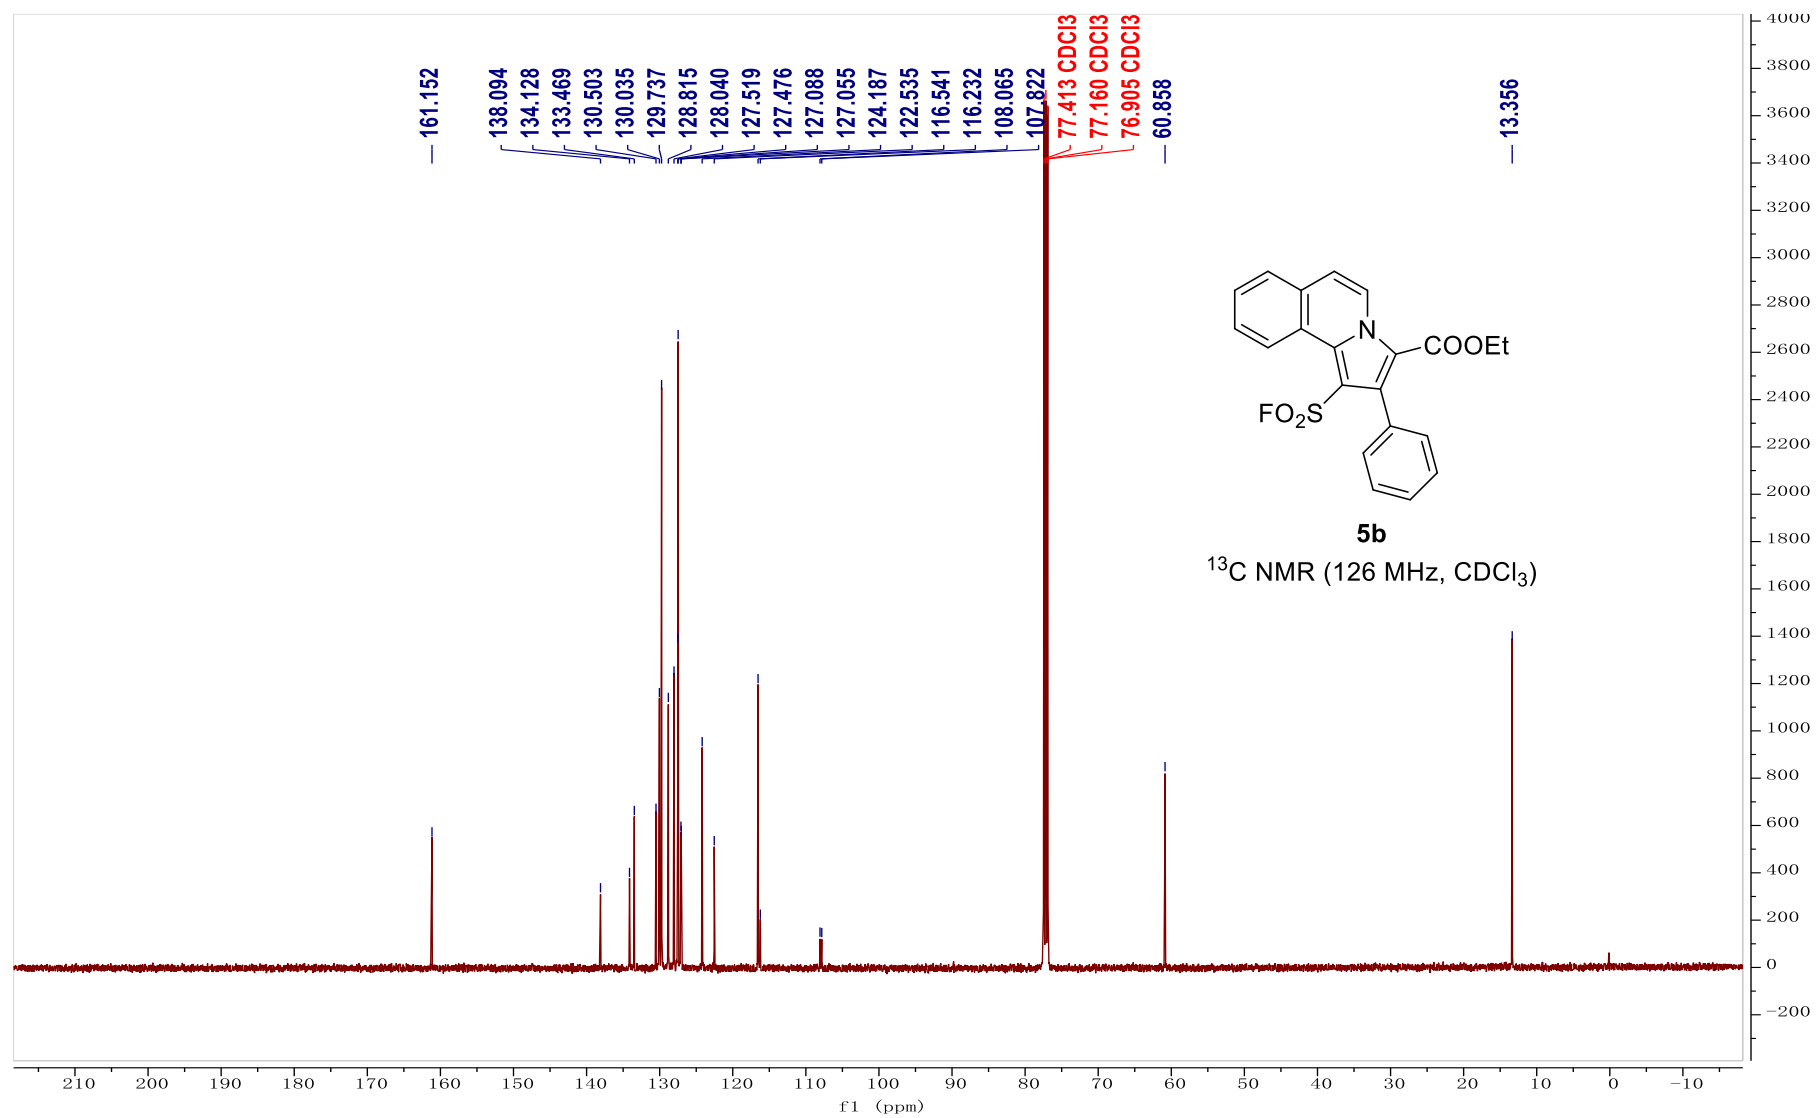

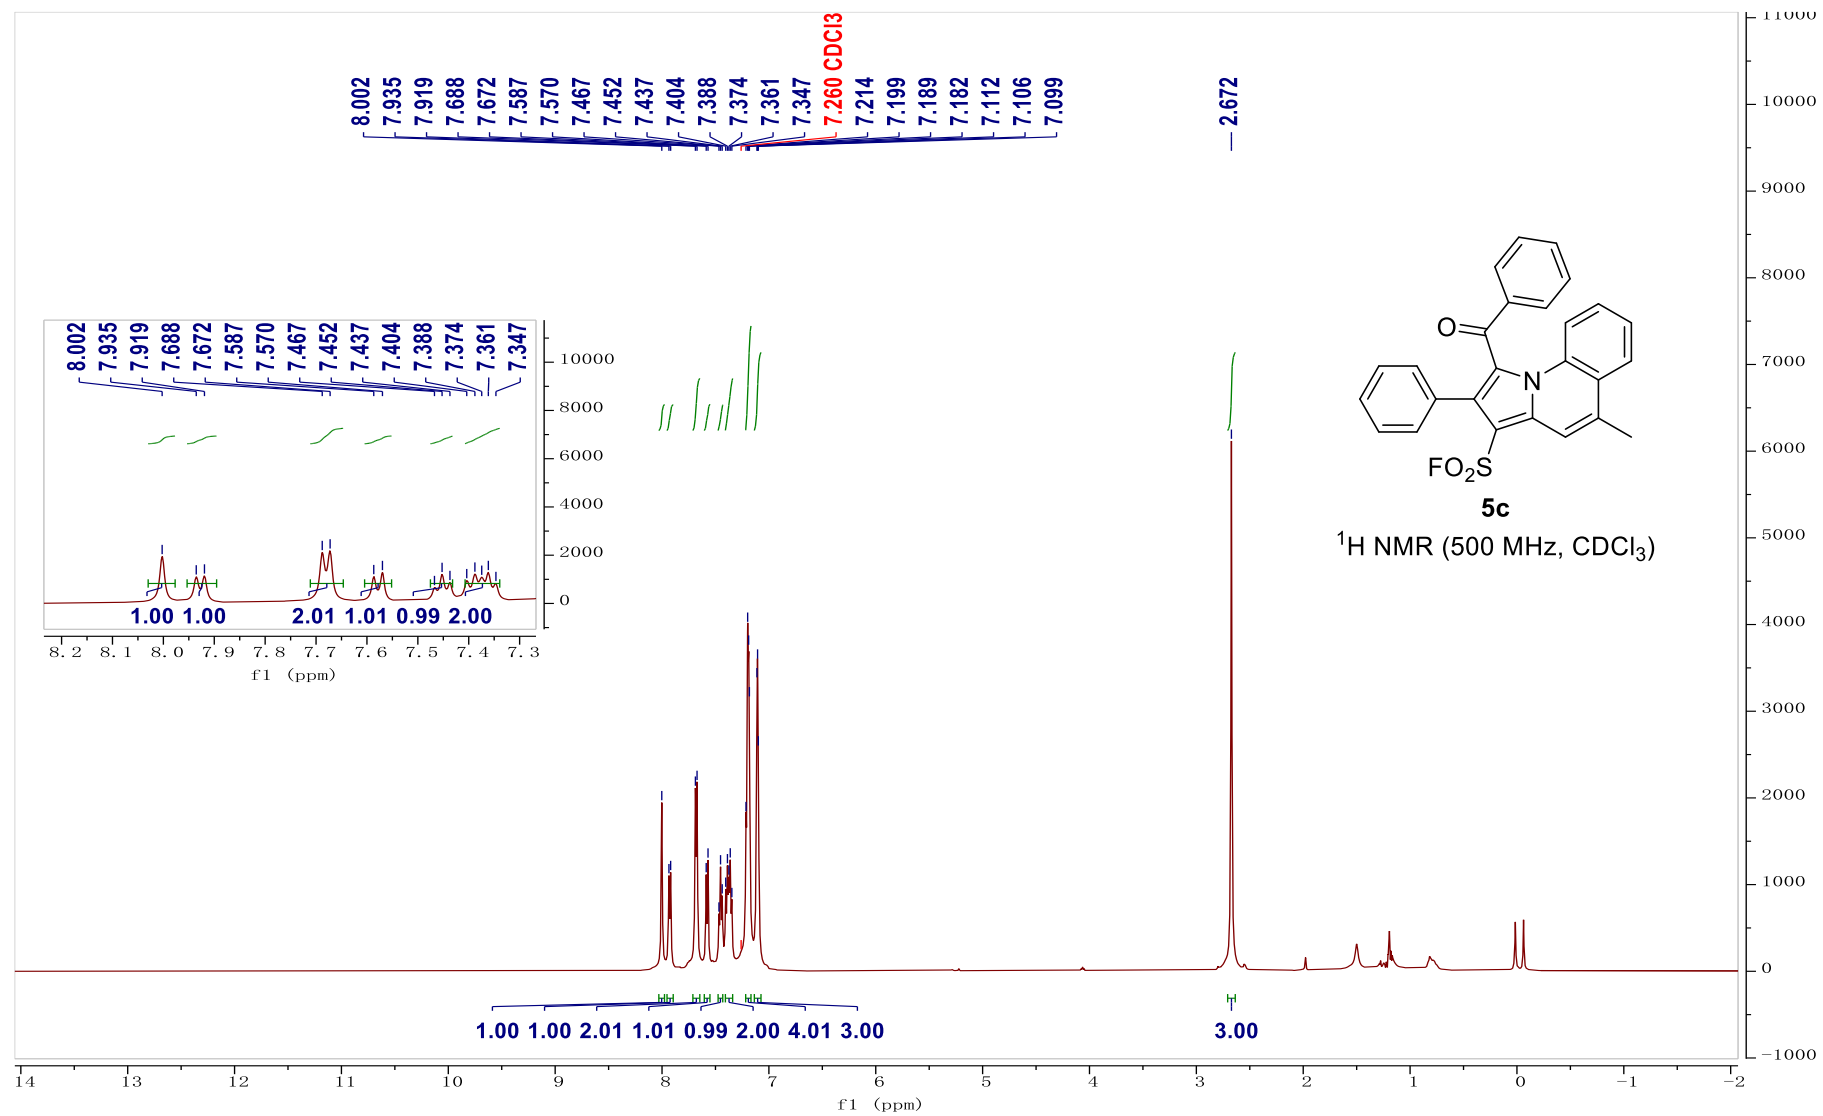

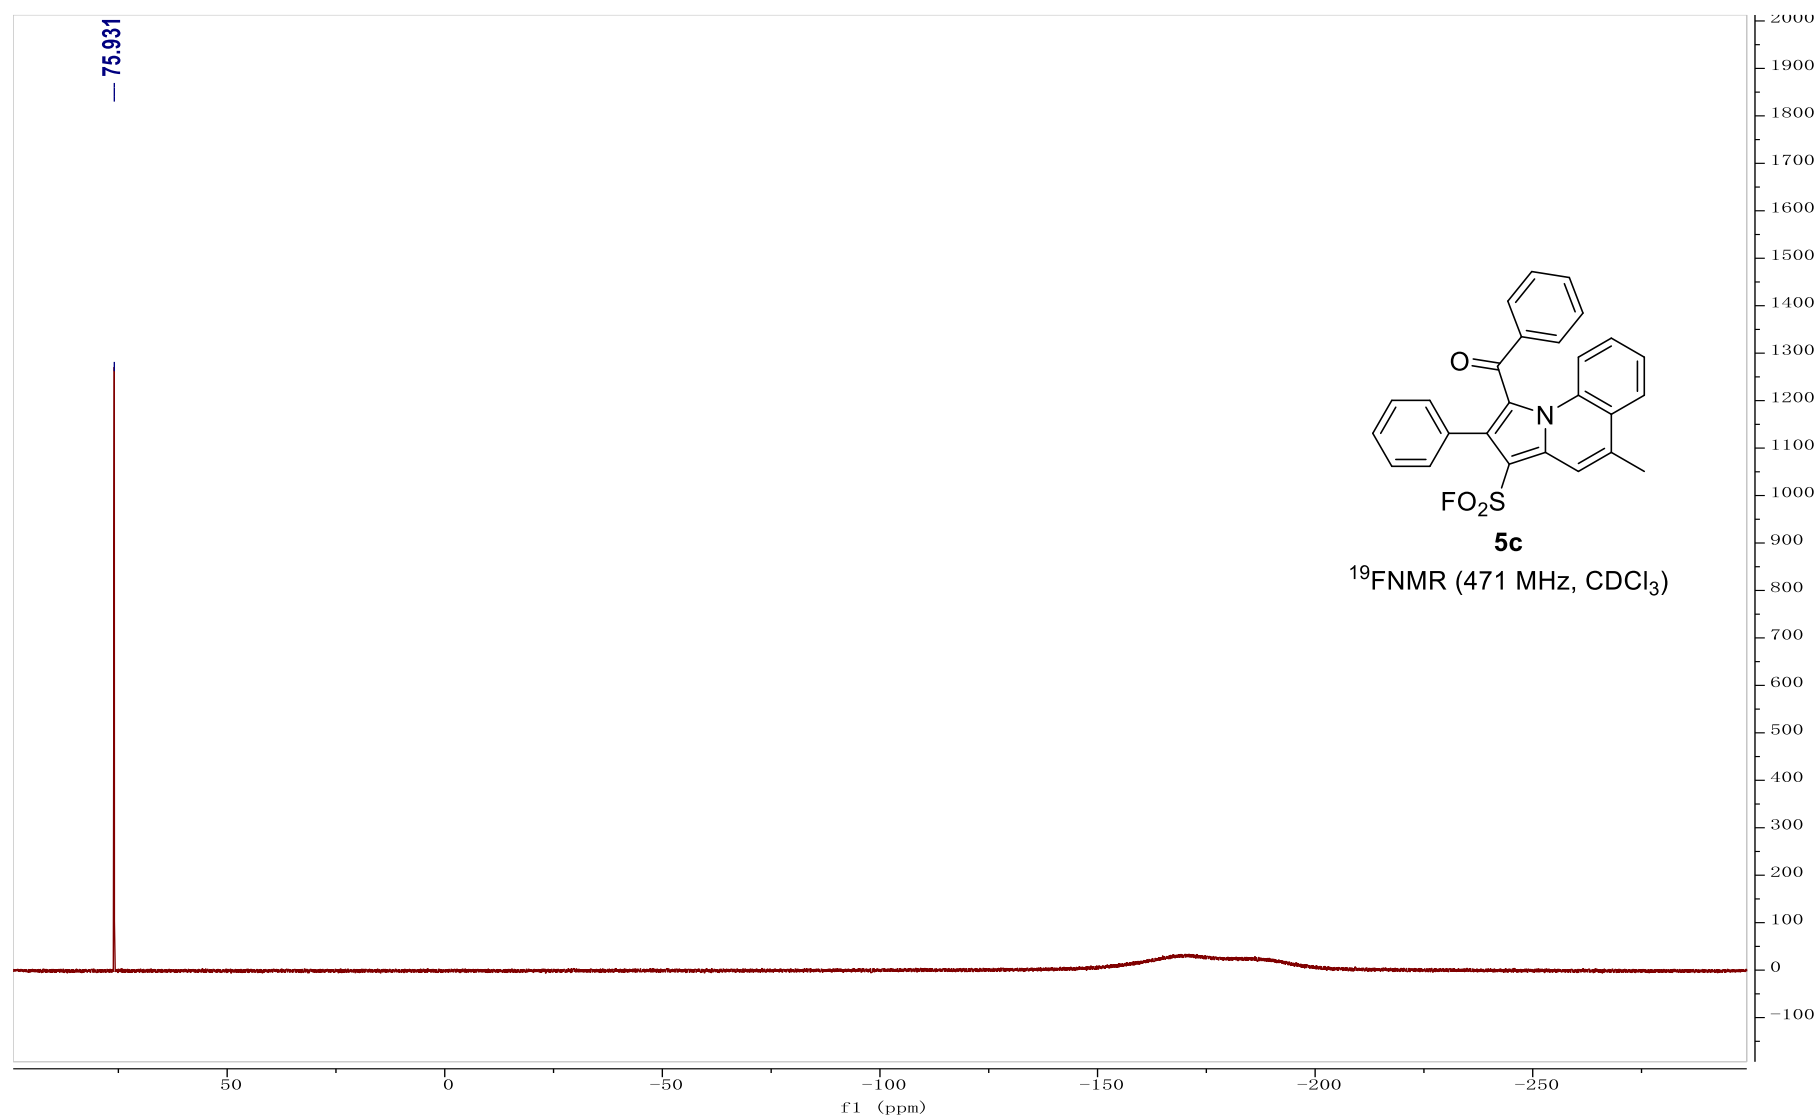

S100

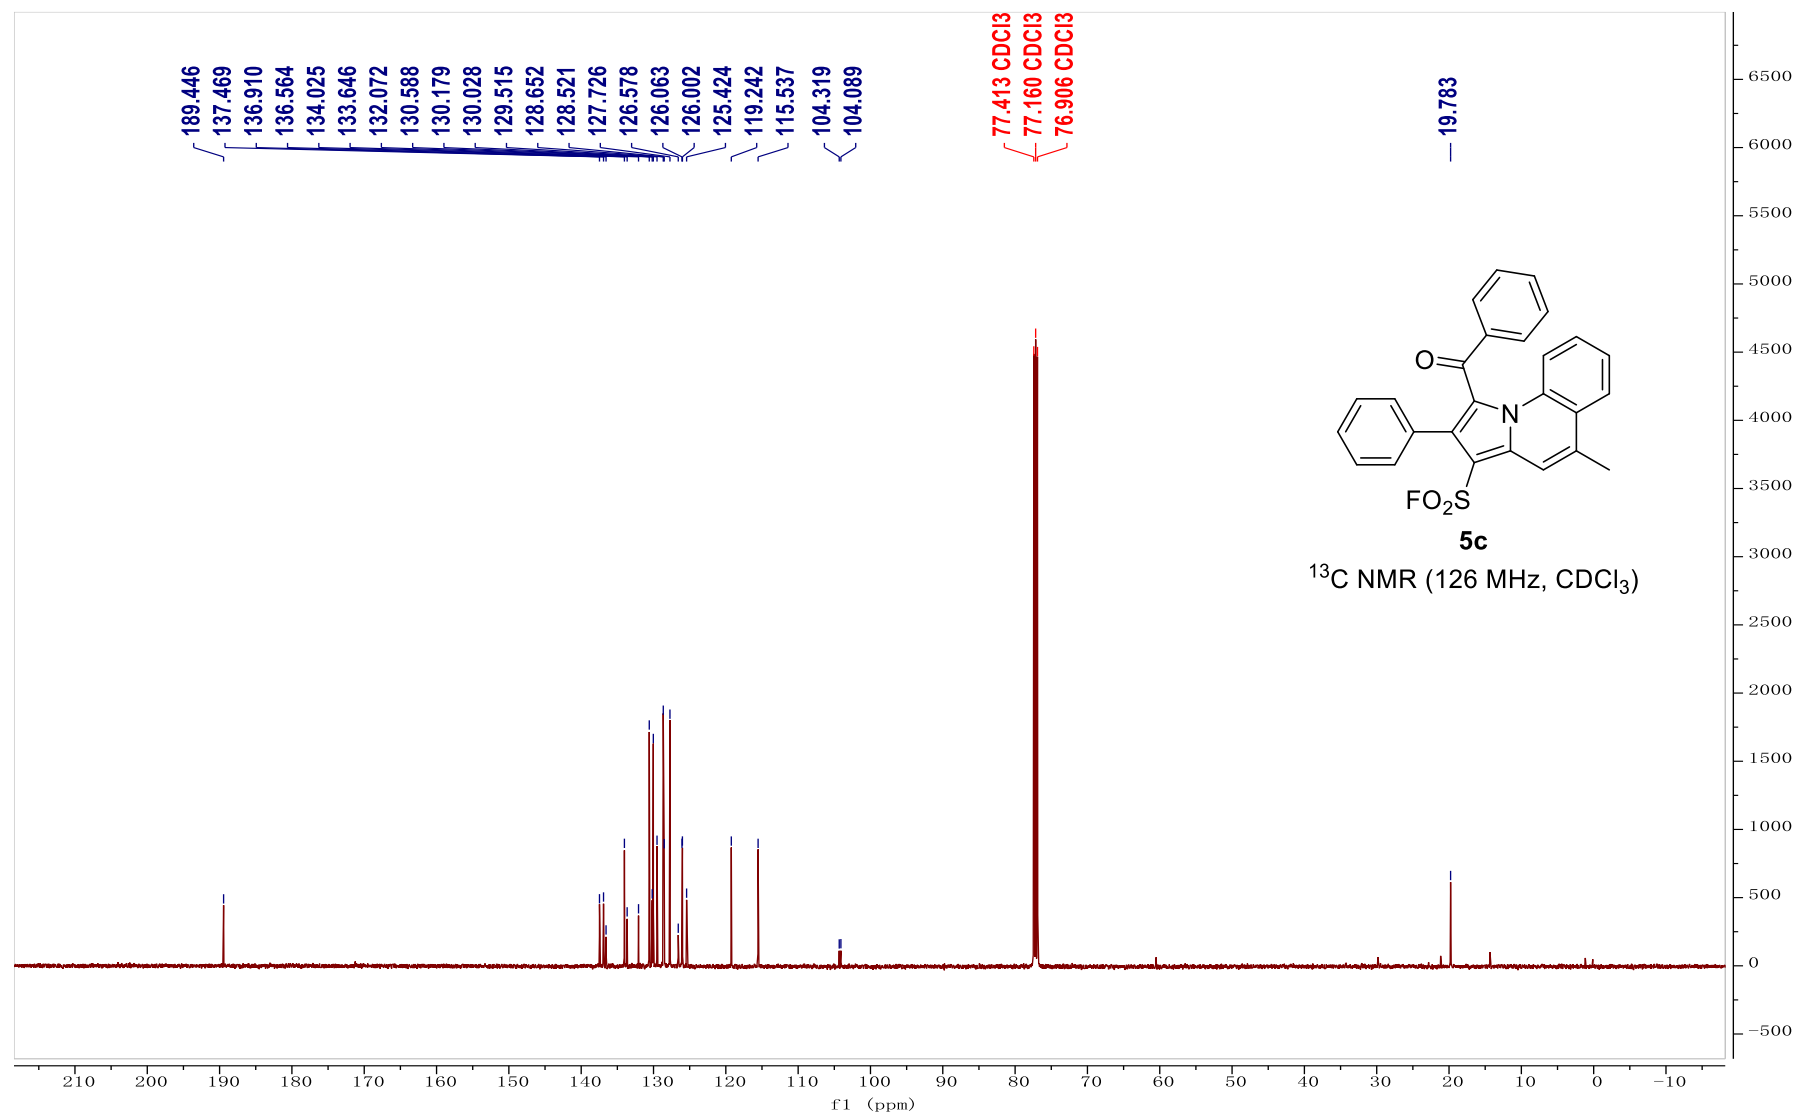

S101

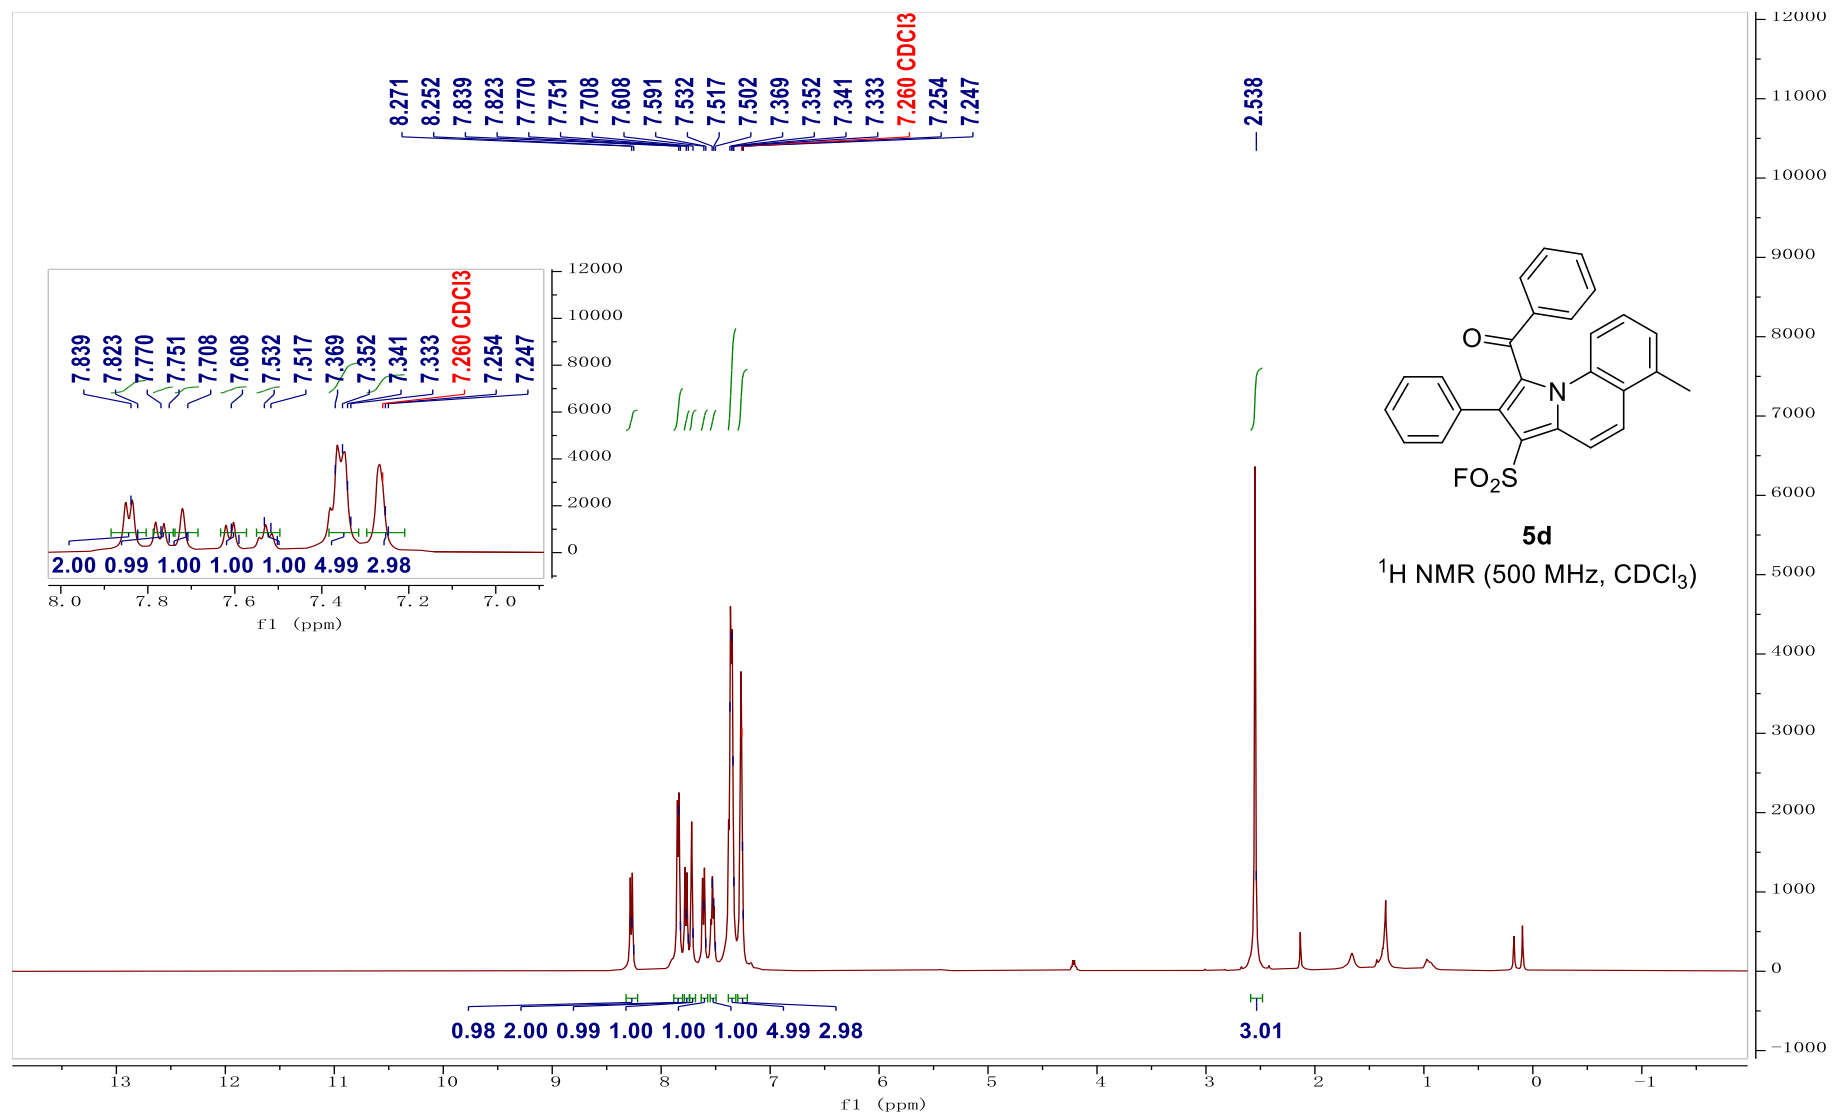

**5d**

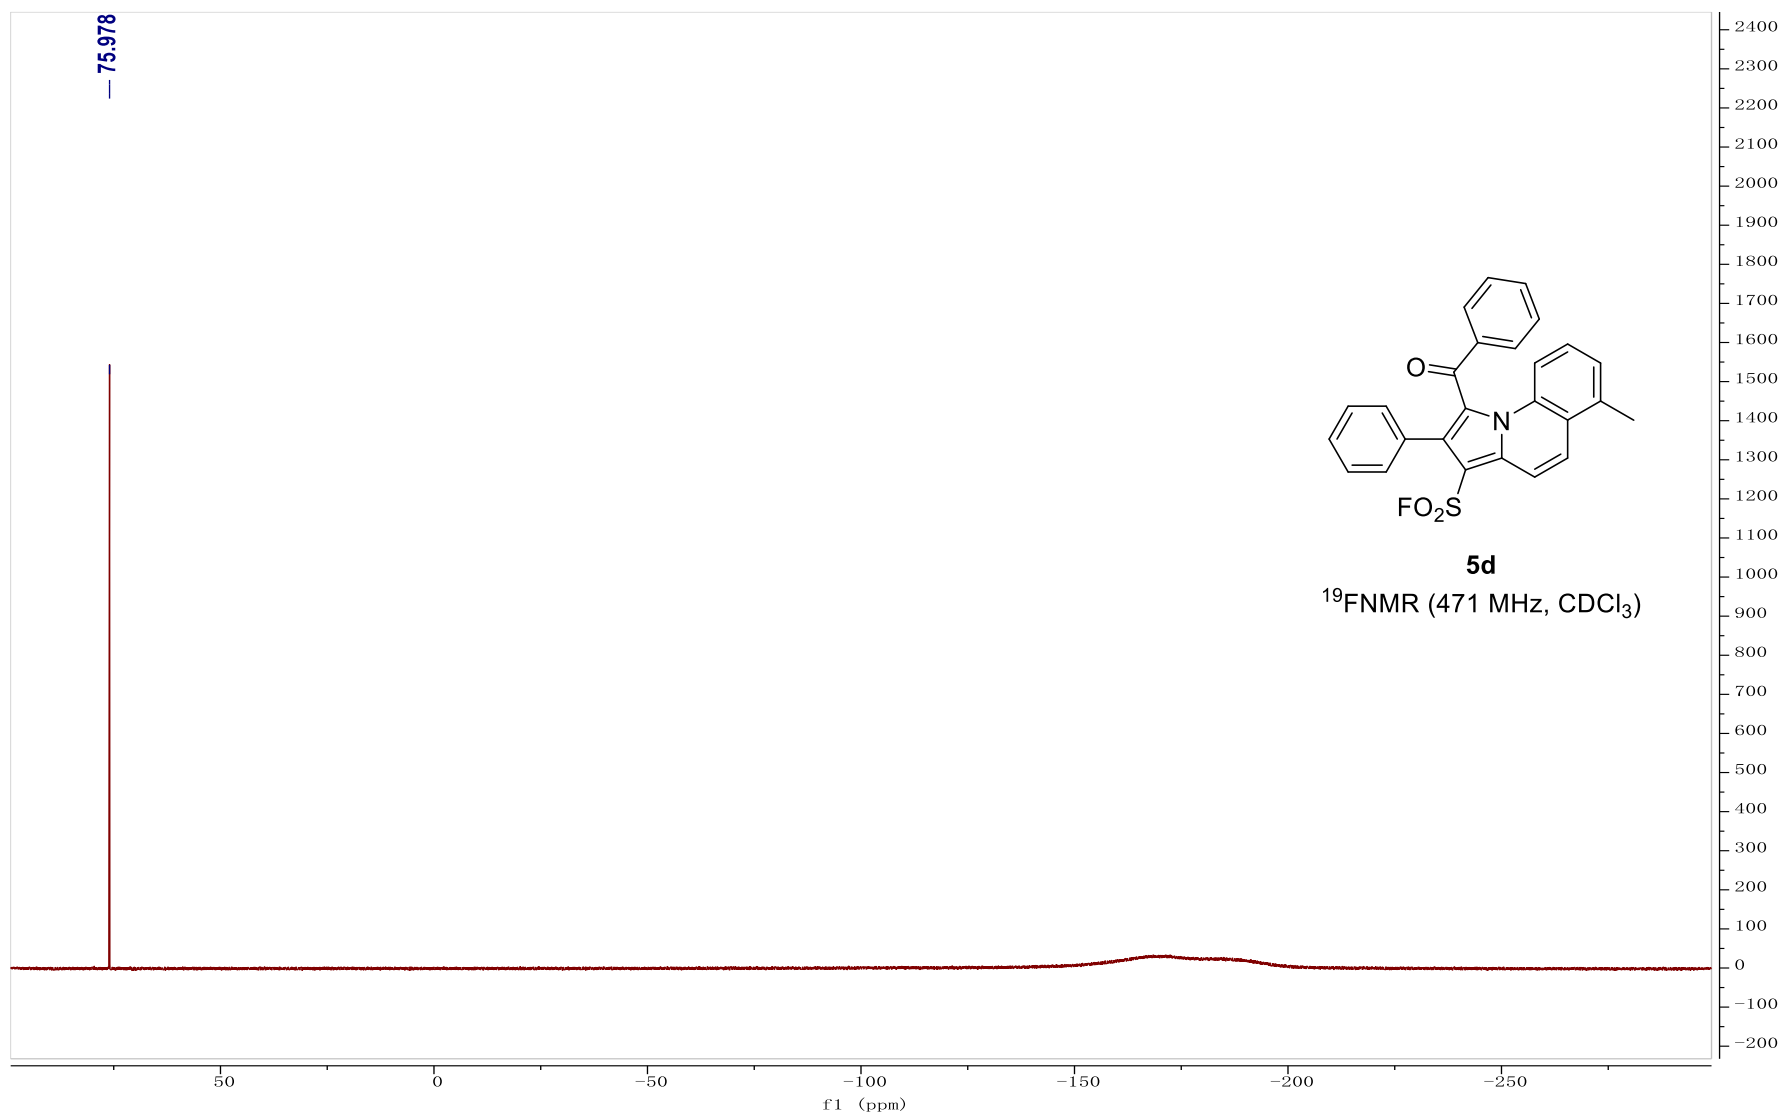

S103

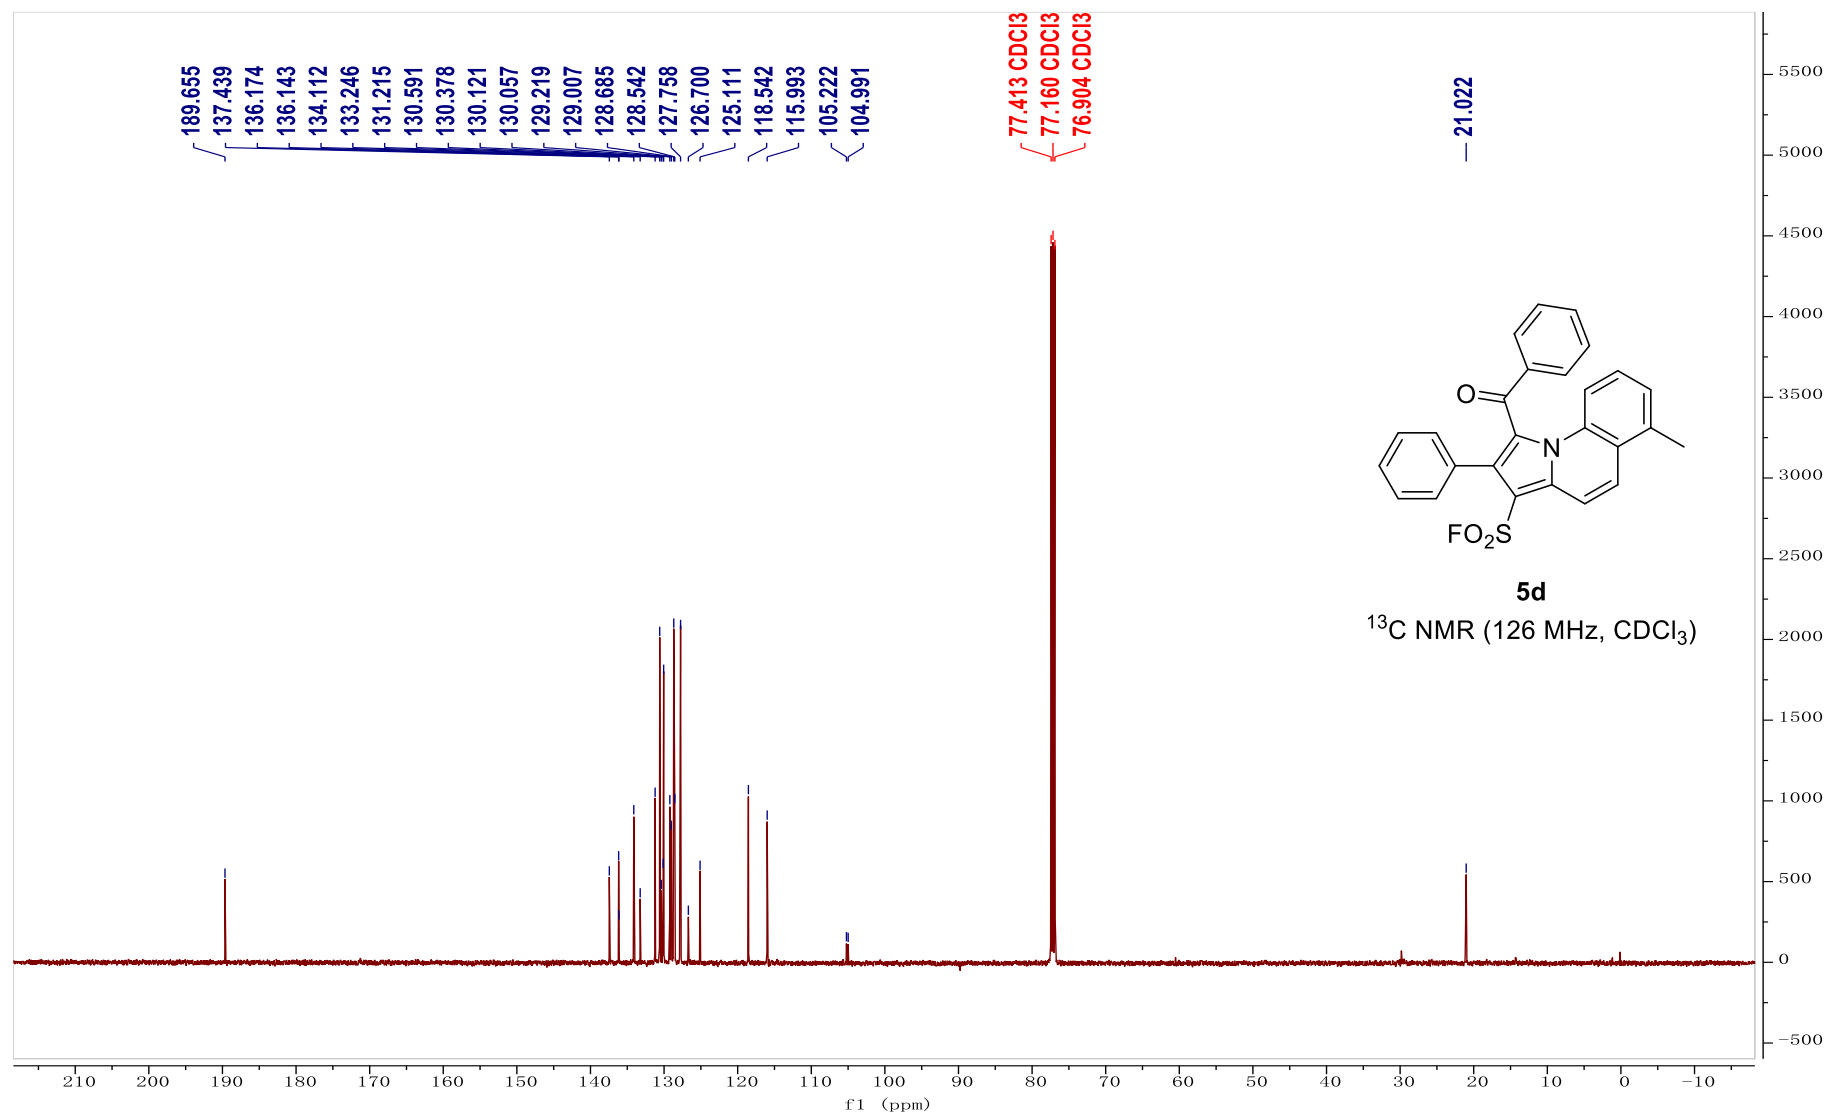

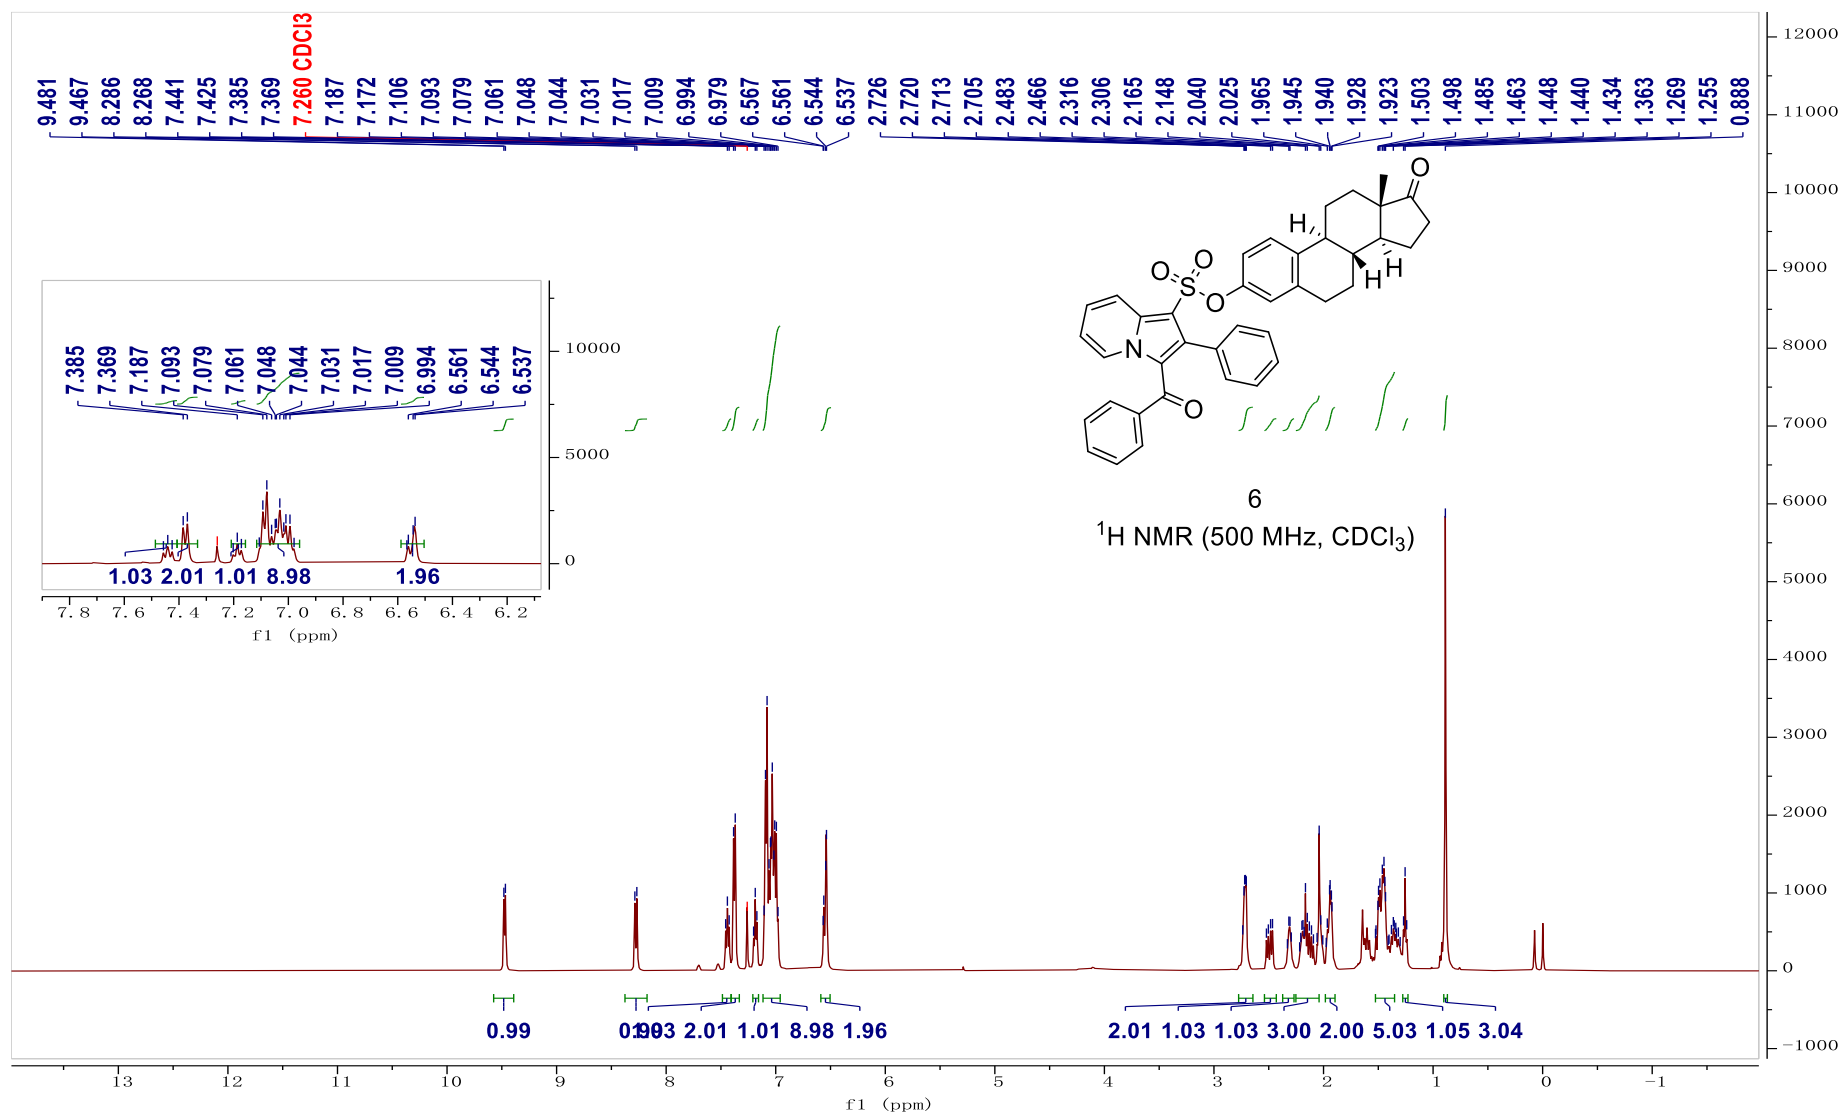

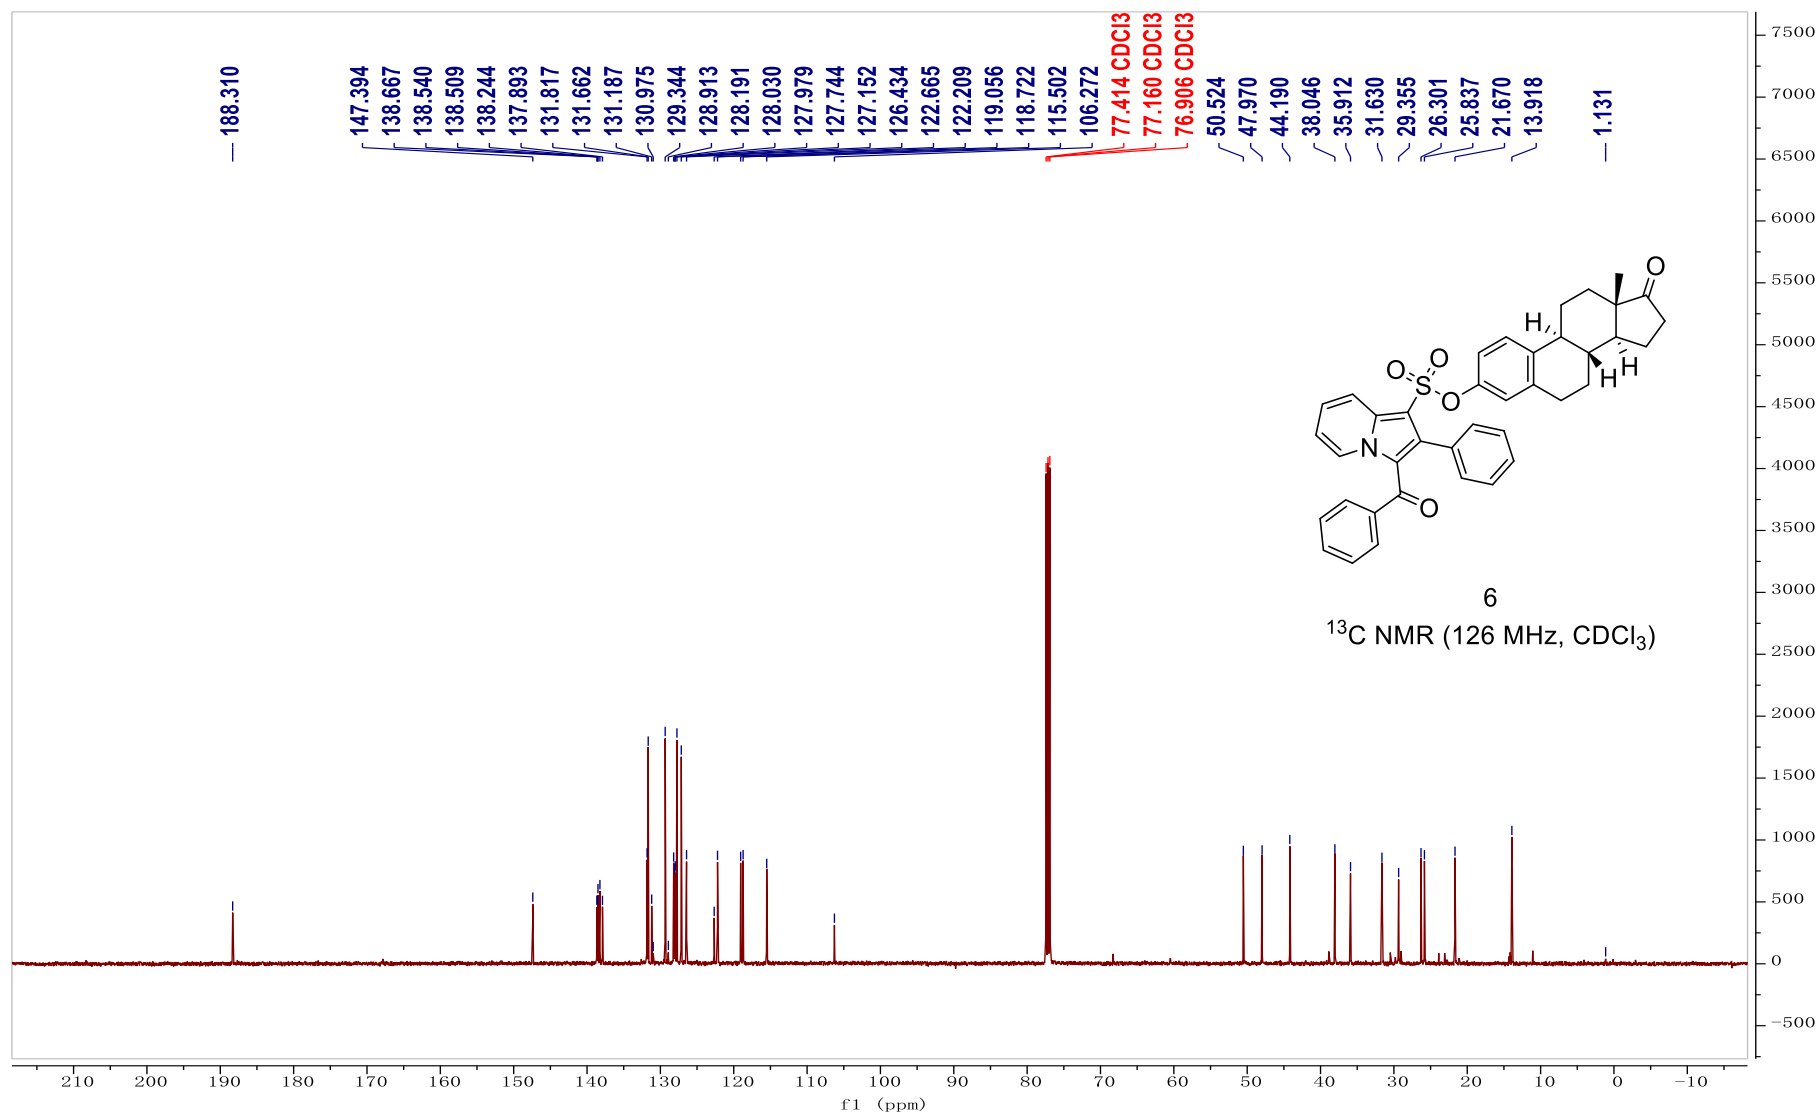

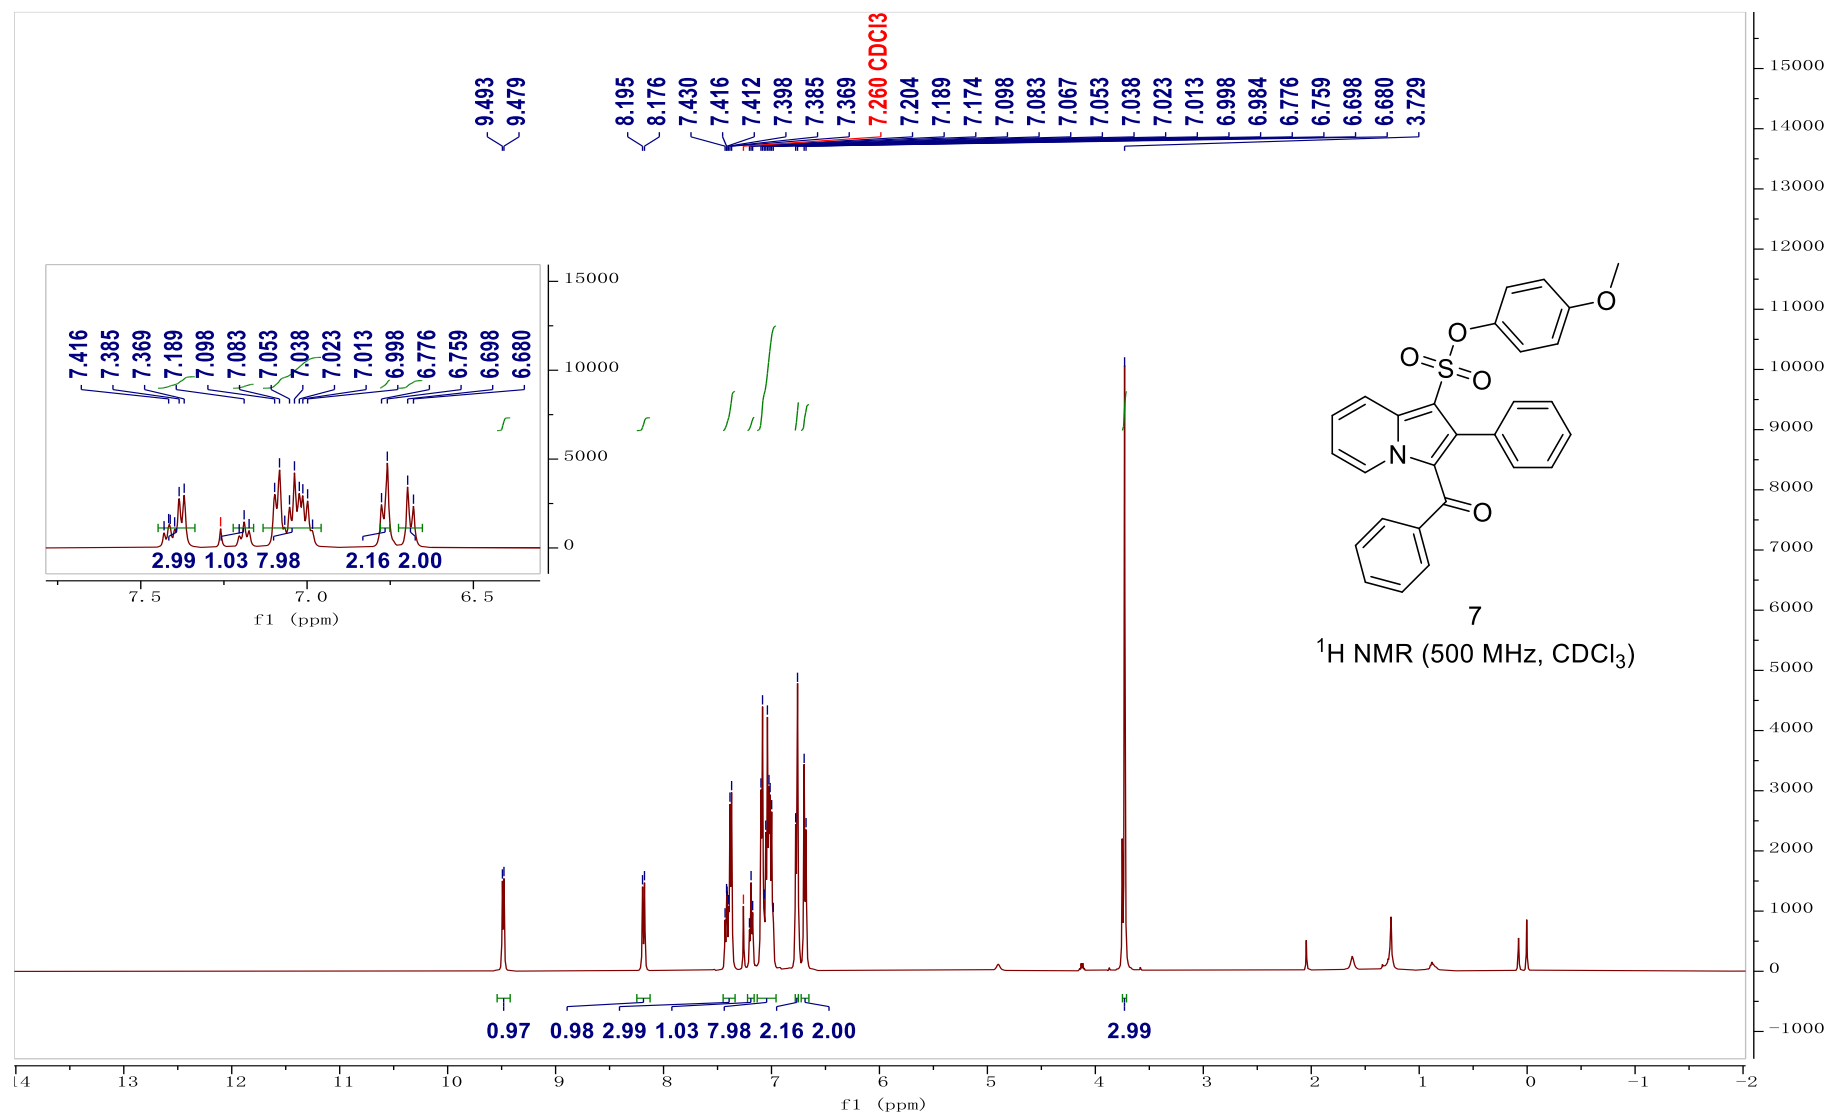

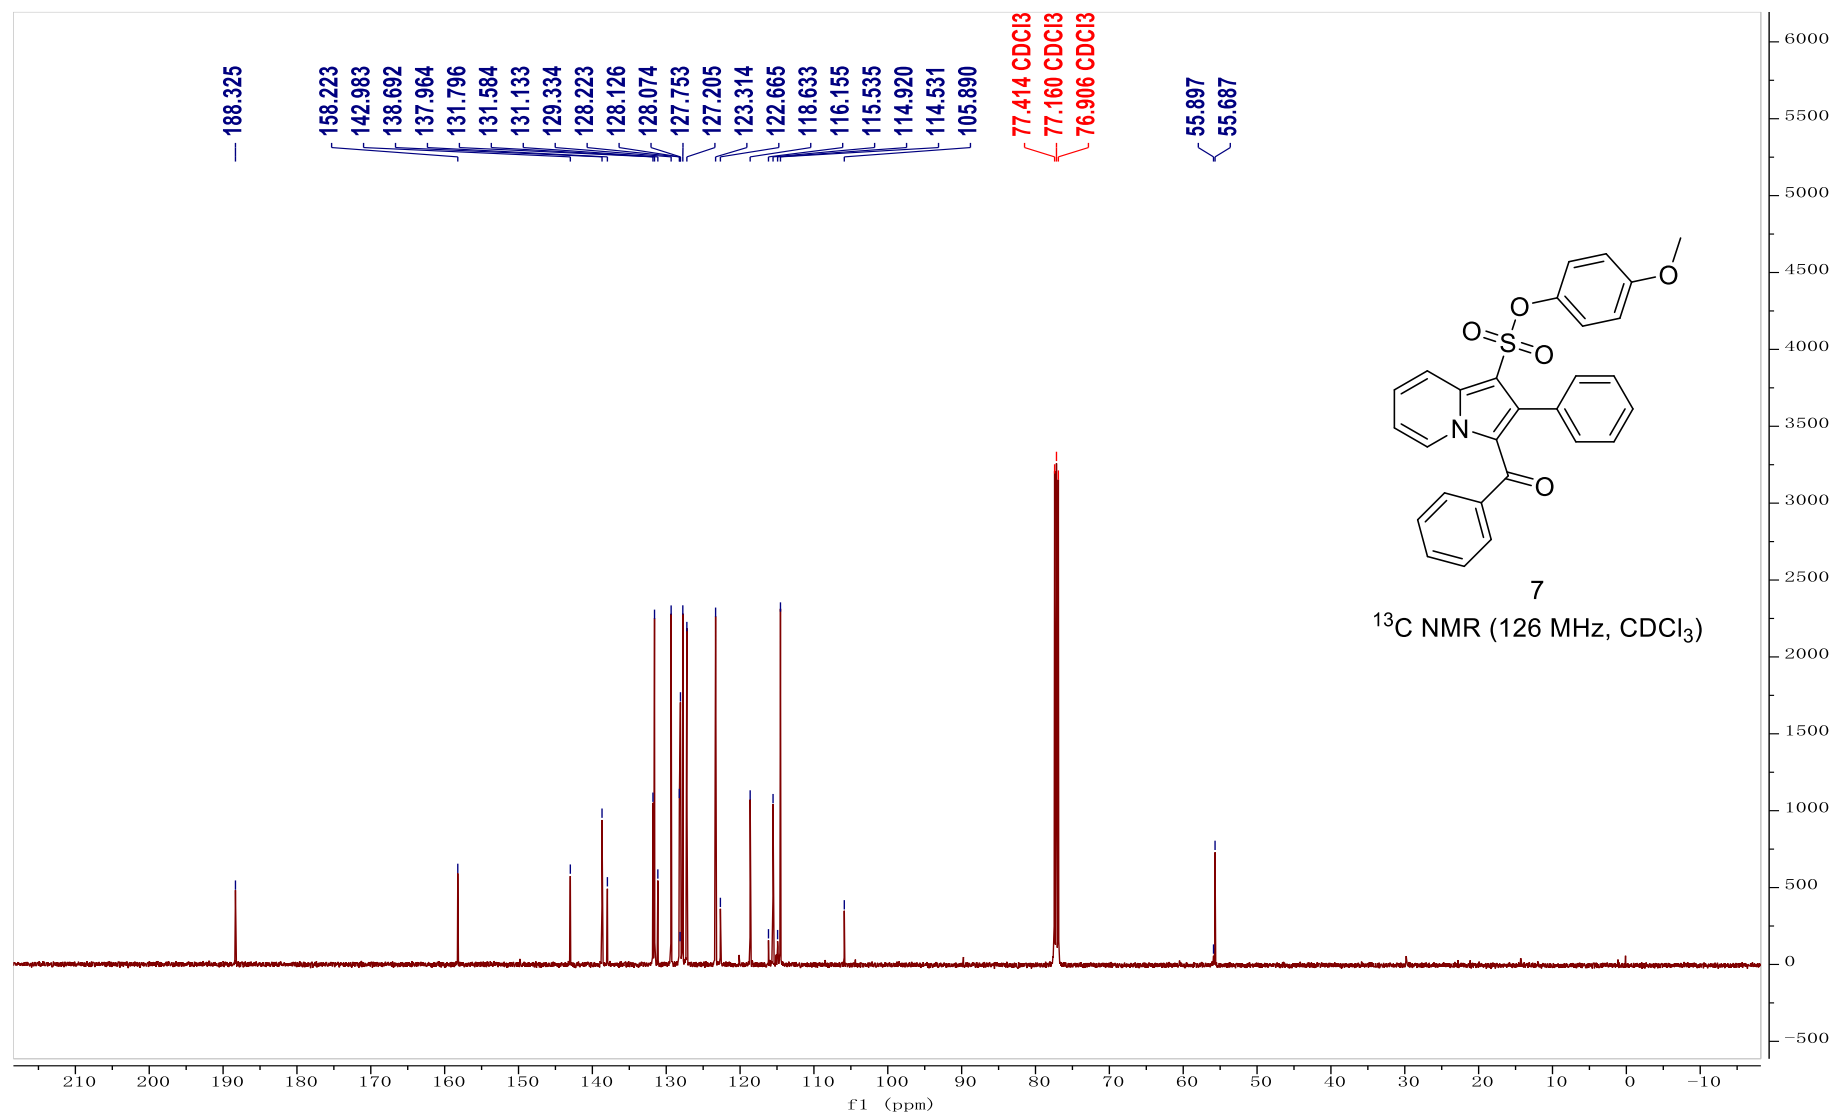

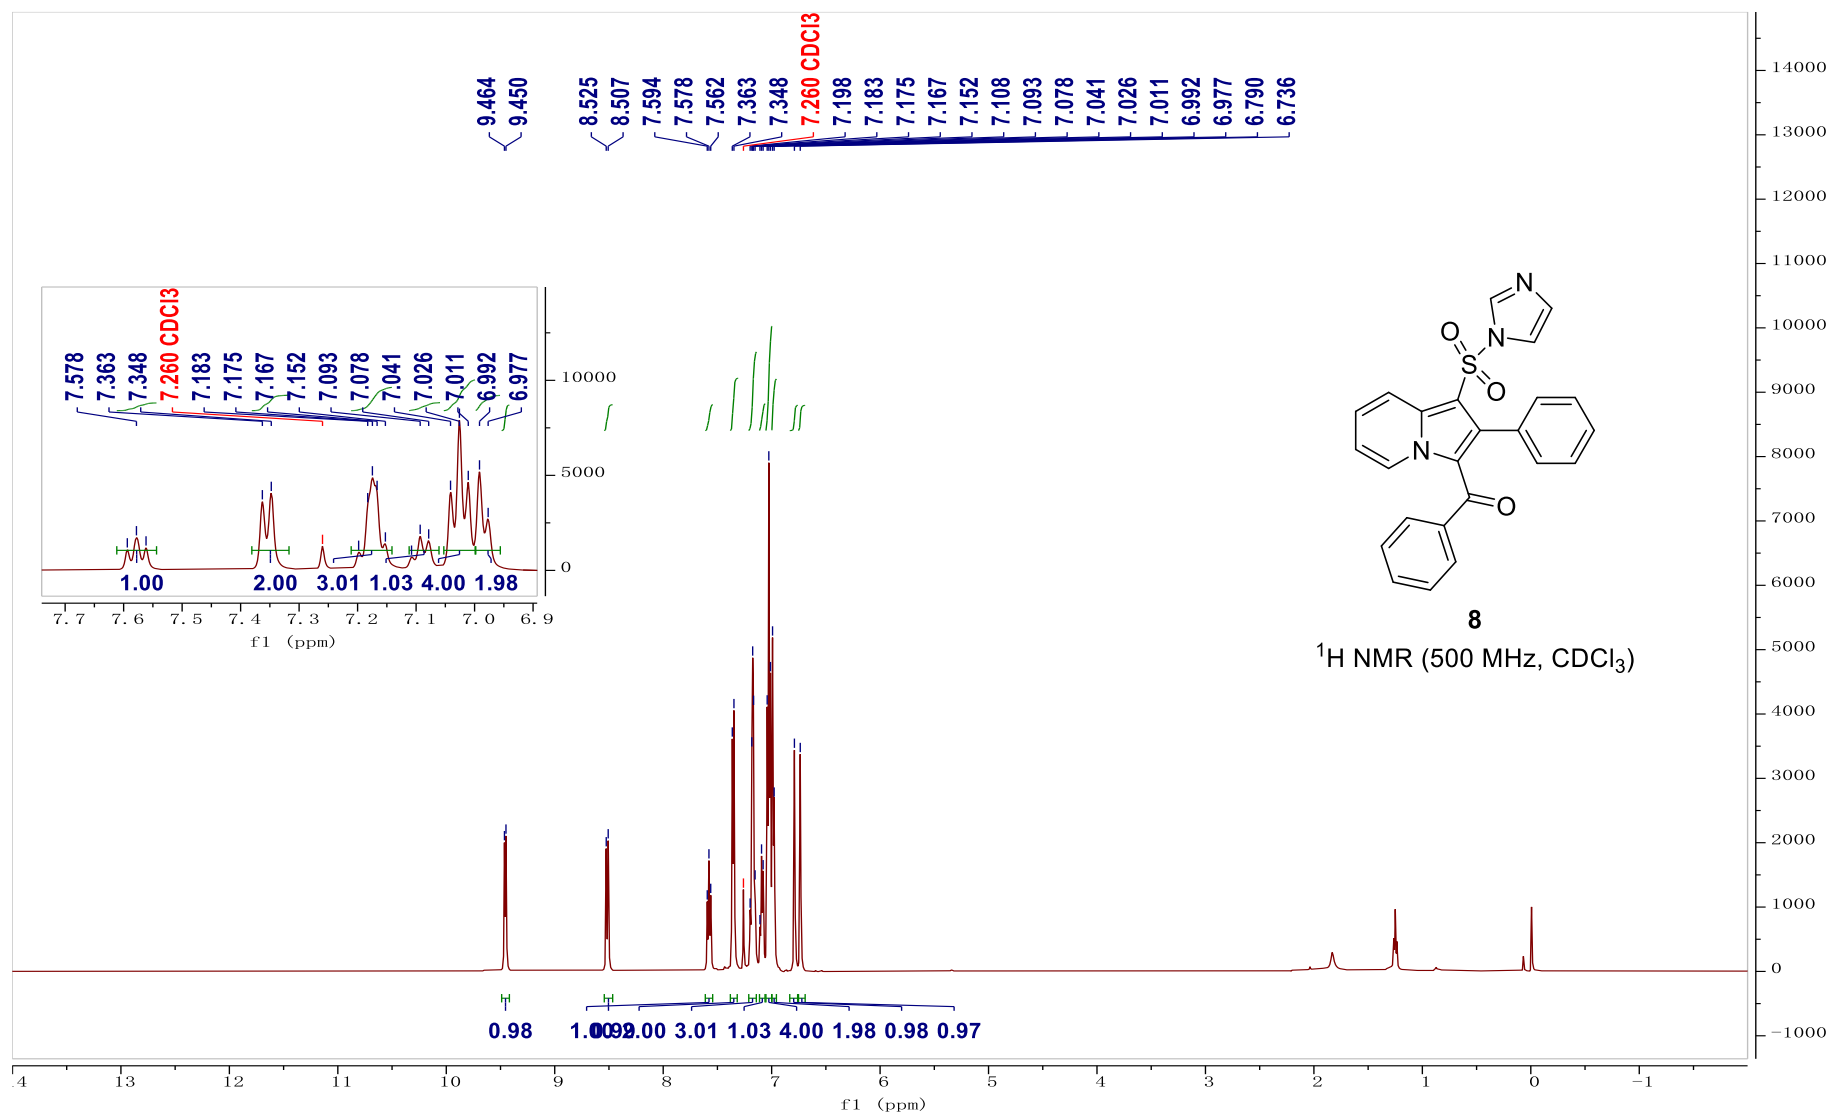

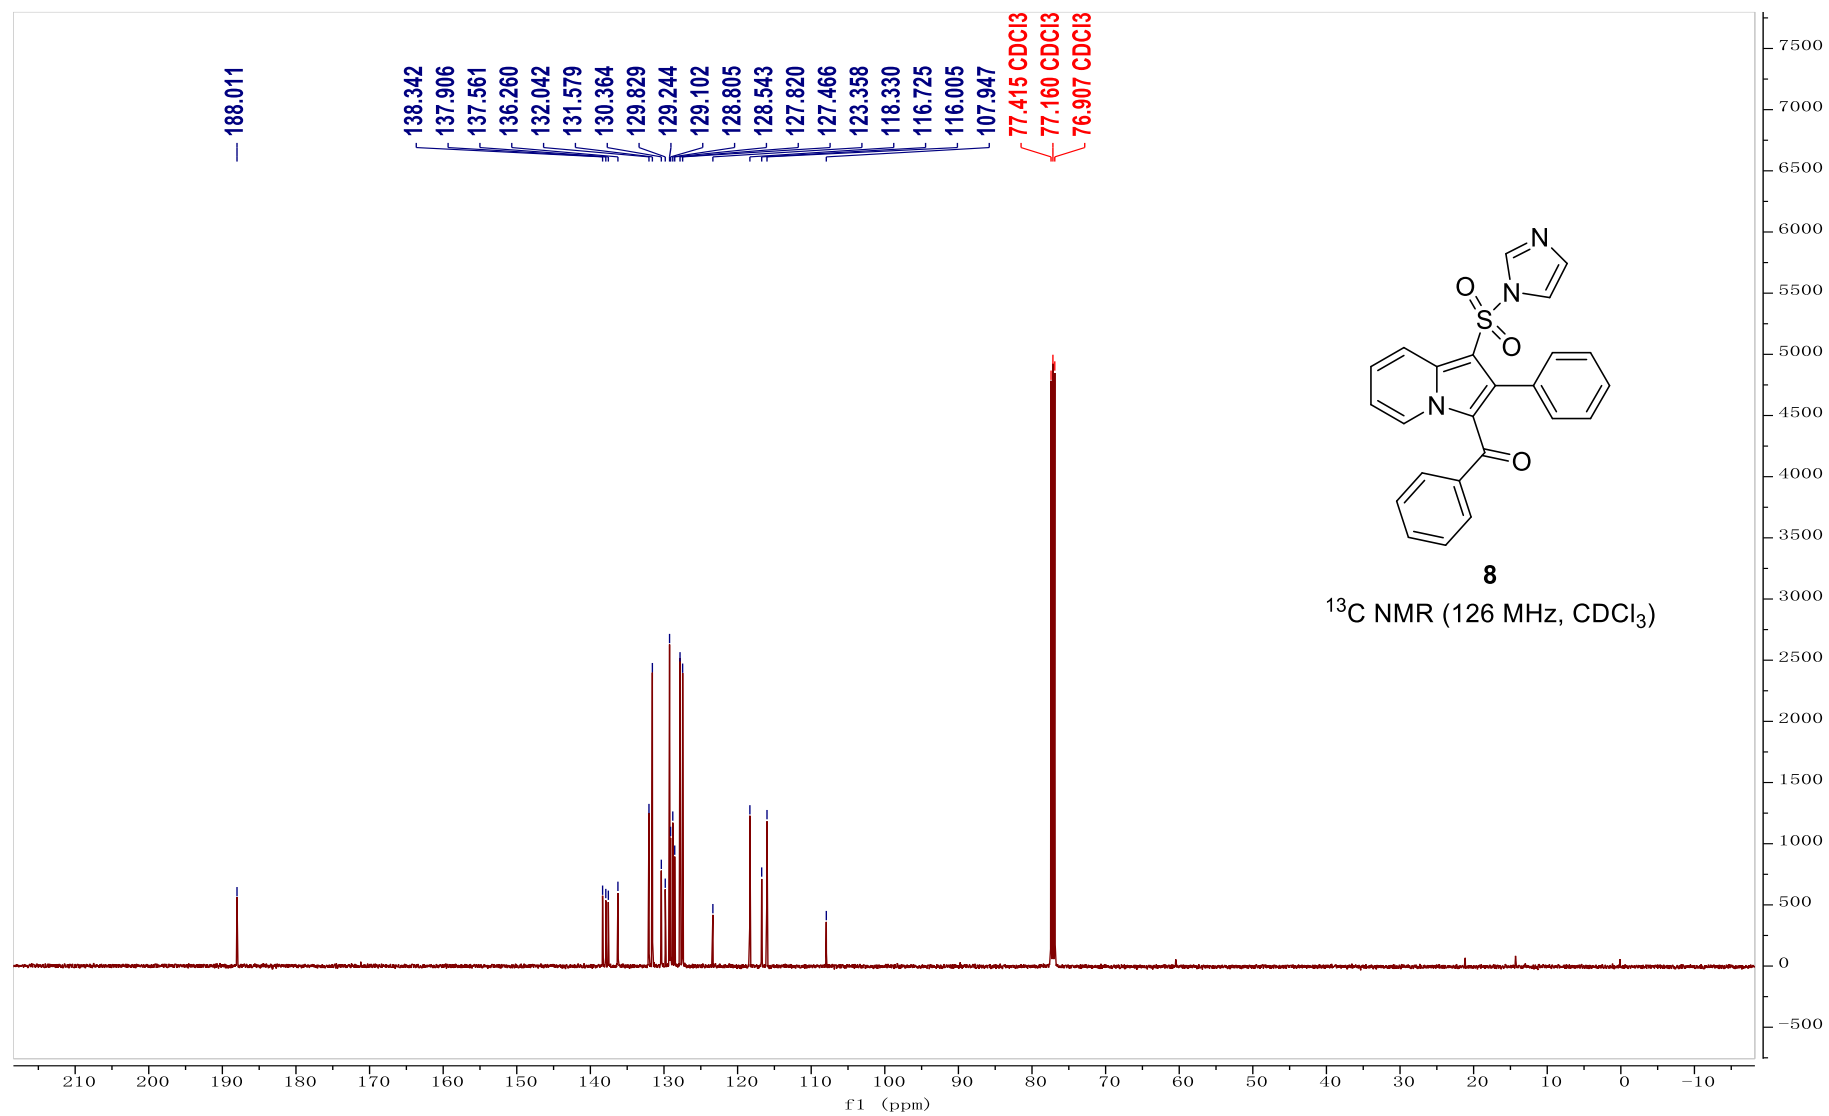

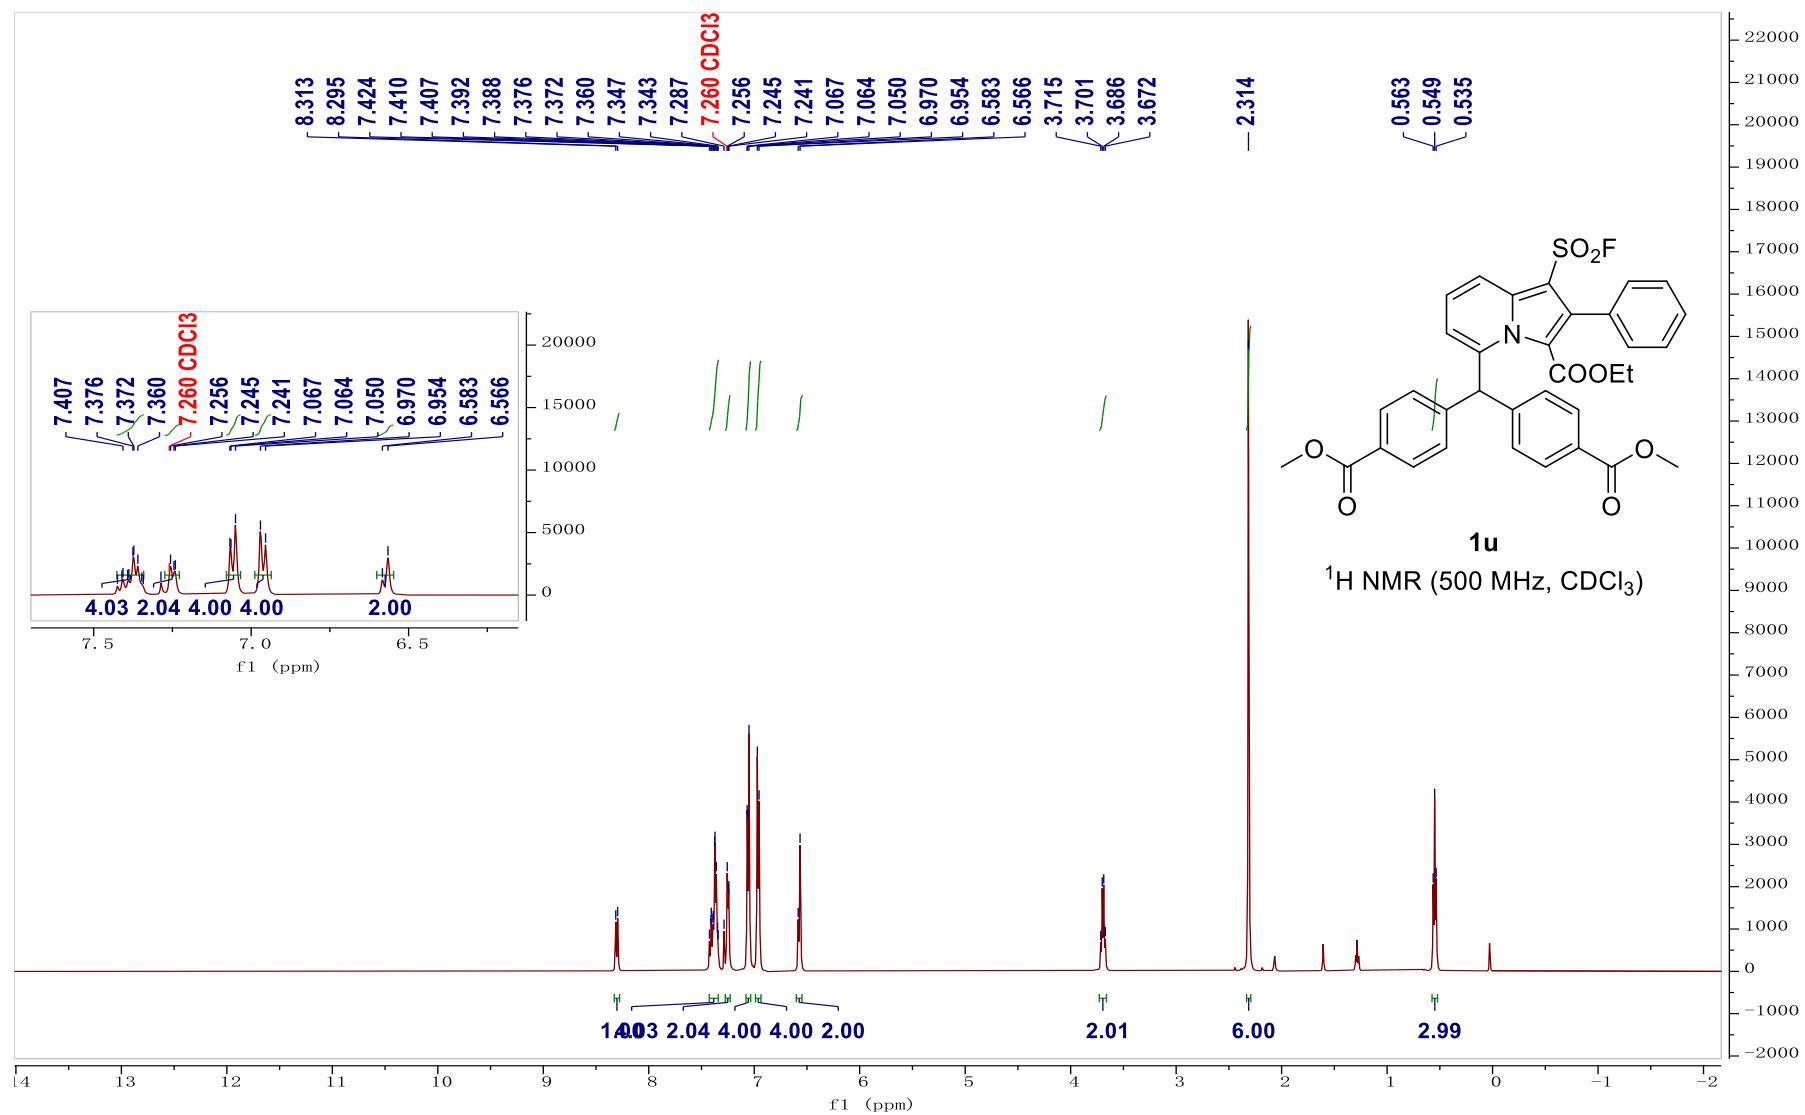

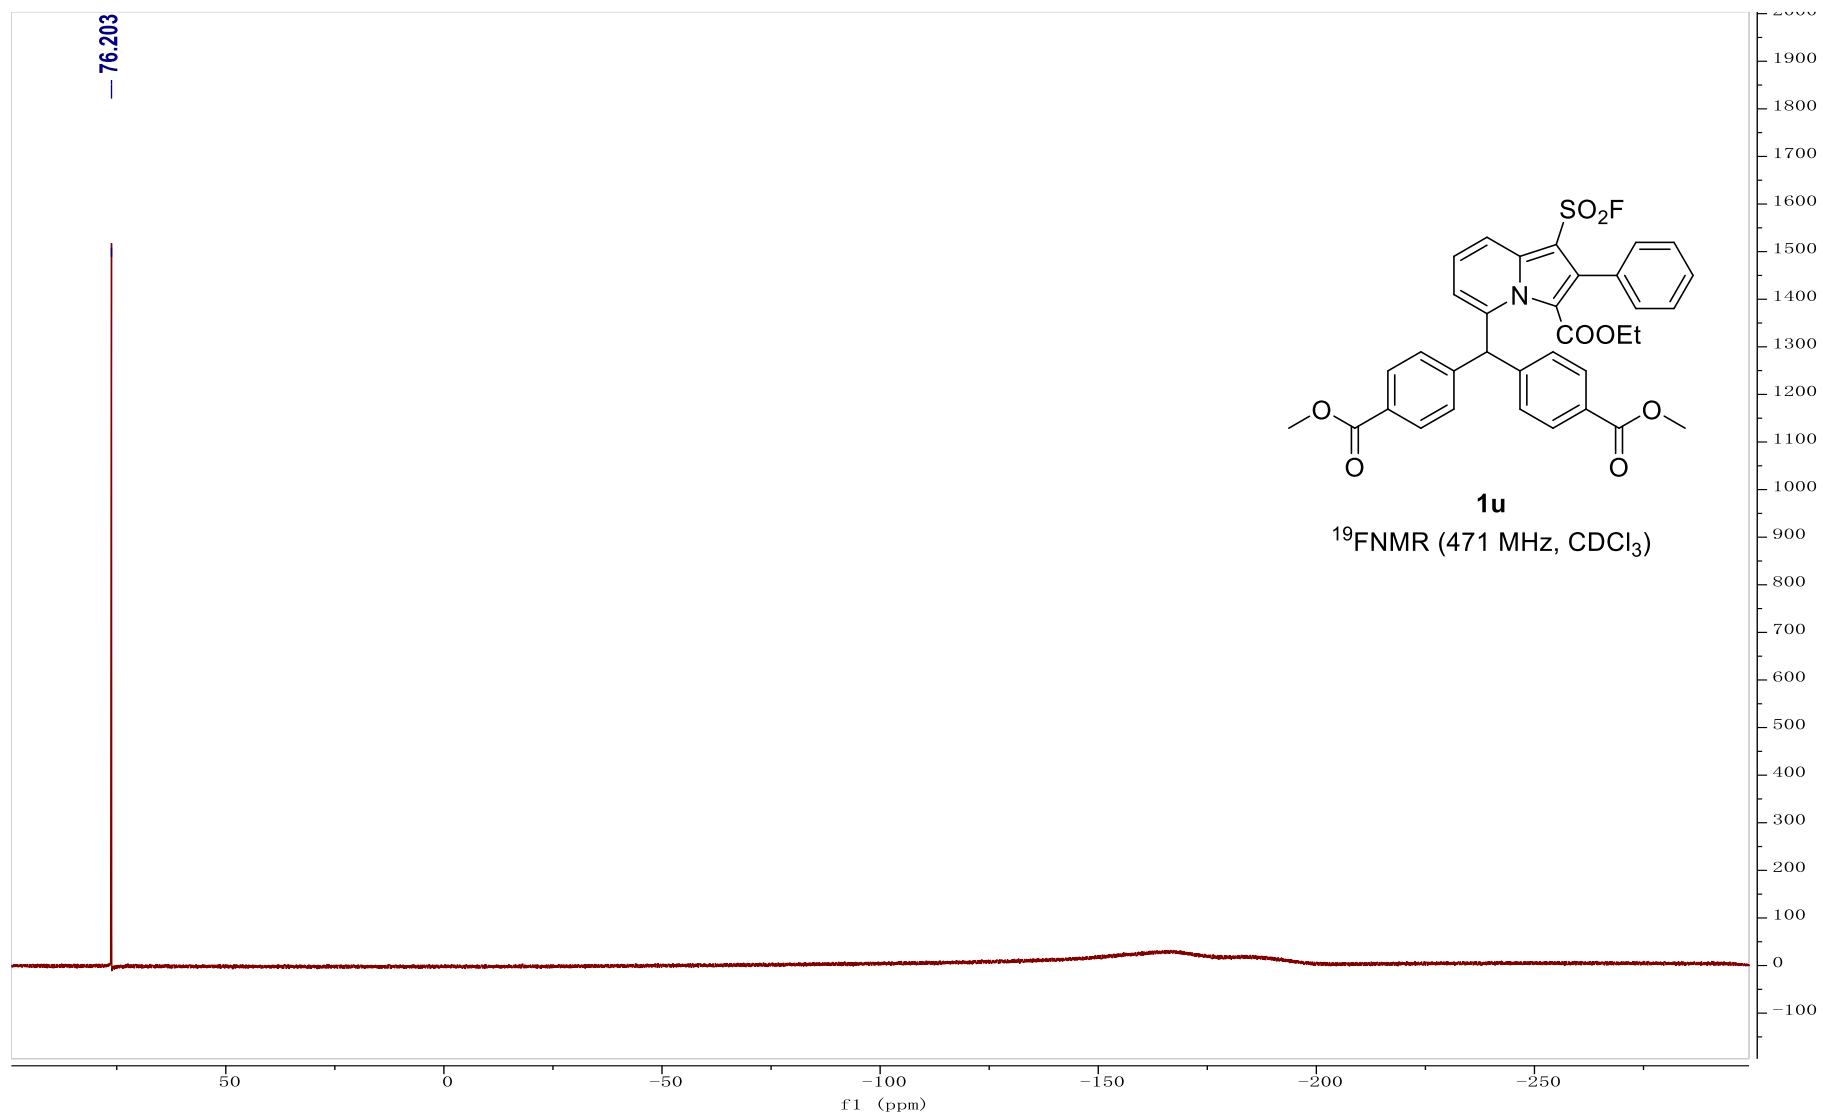

S112

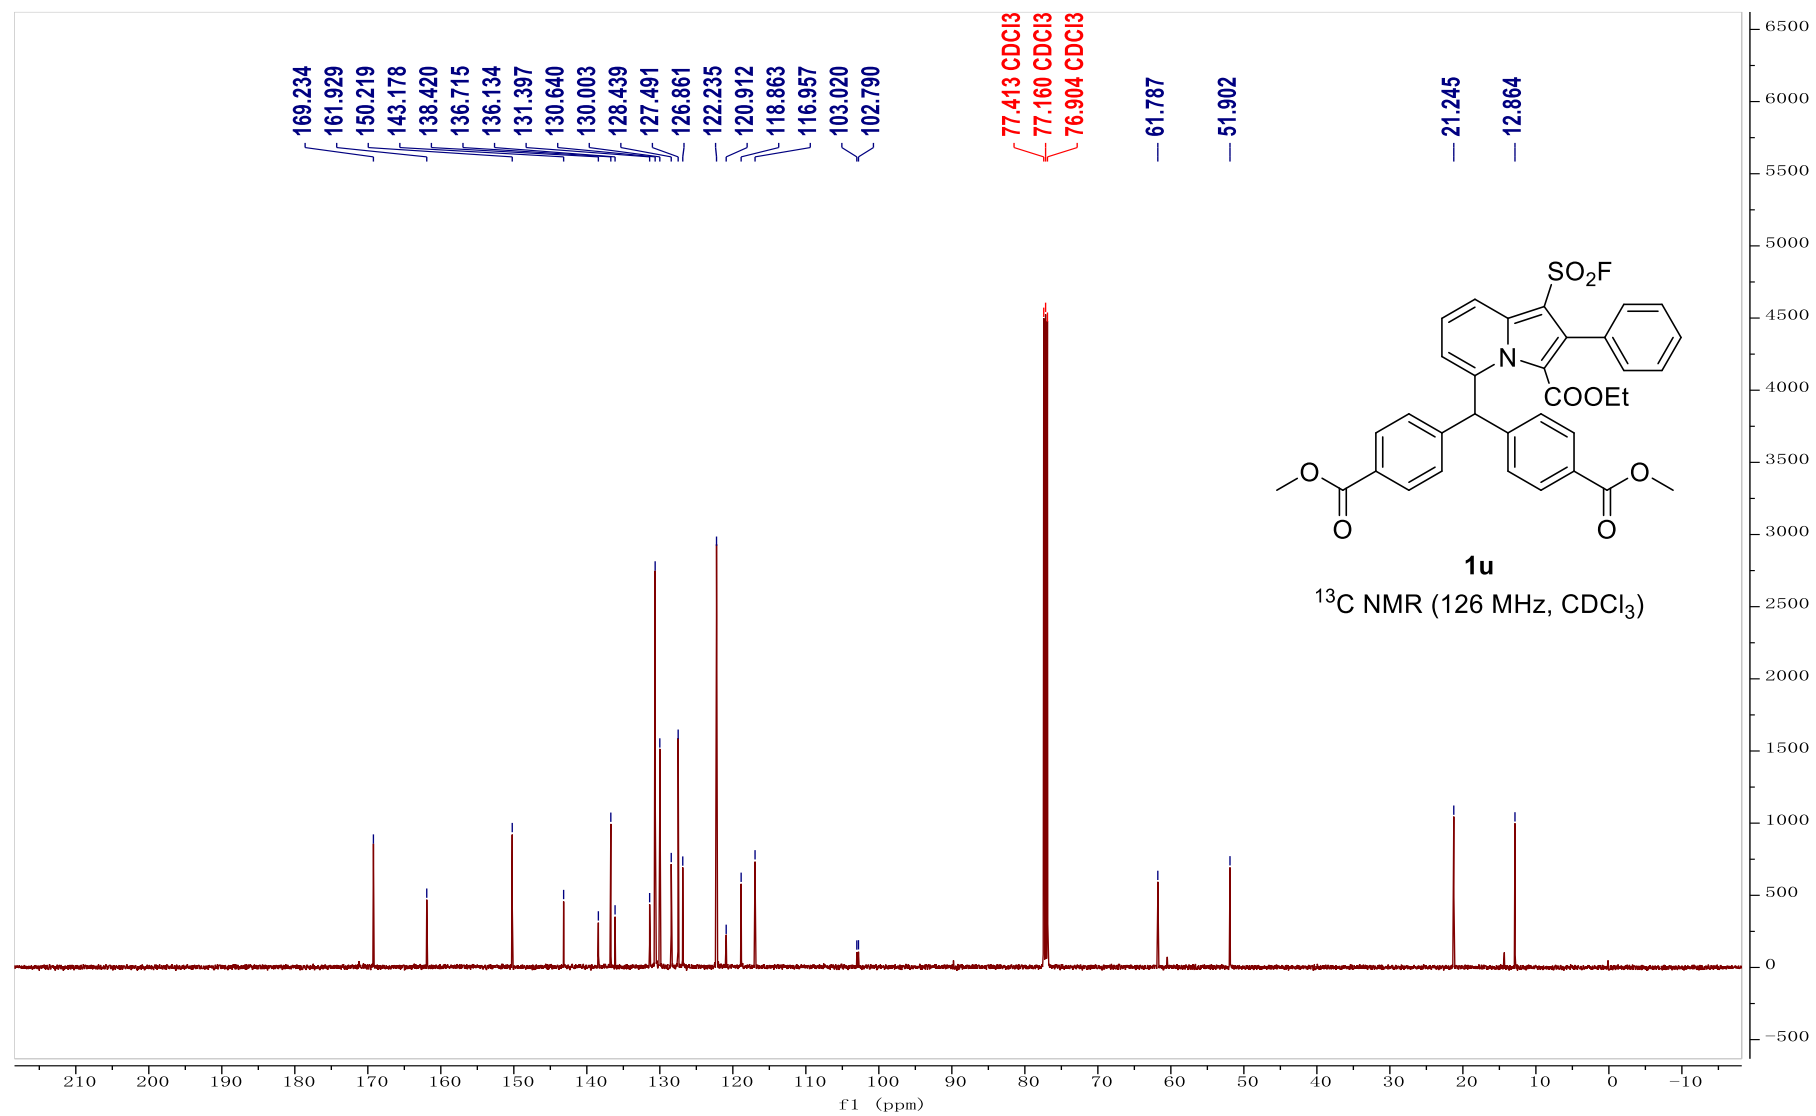

## 8. Data of Crystal Structure of **3s**

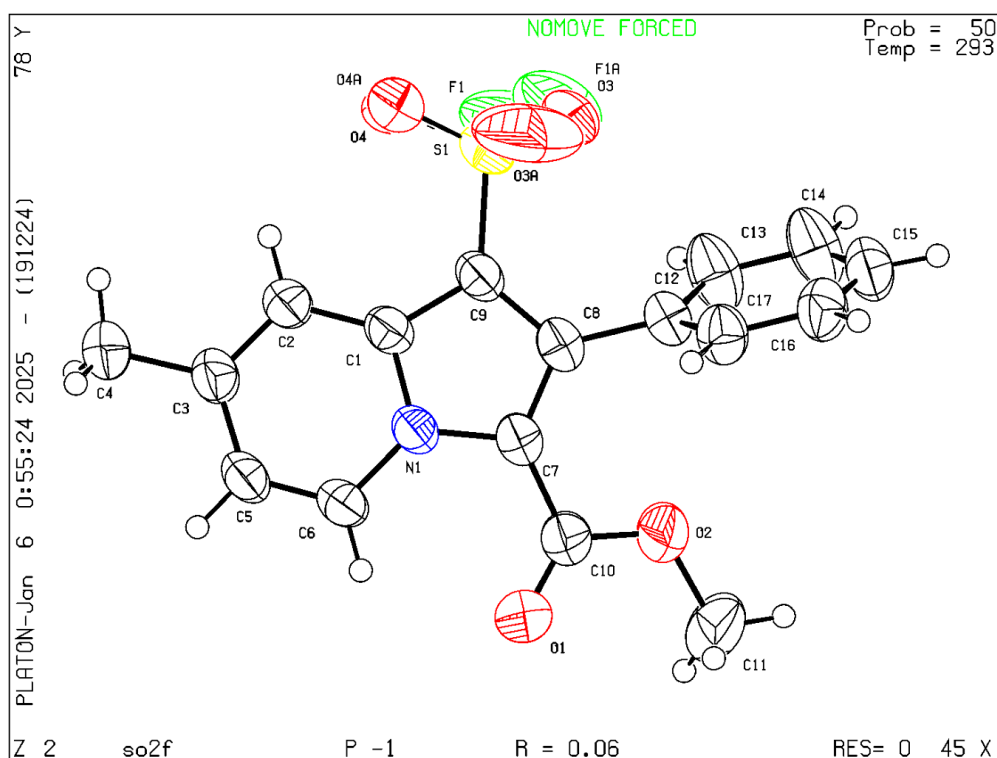

Approximately 50 mg of the purified compound **3s** was dissolved in  $\text{CHCl}_3$  and placed under dark conditions to evaporate slowly. After several days, colorless crystals were obtained. Data for **3s** were collected from a shock-cooled single crystal at 293(2) K on a XtaLAB Synergy, Dualflex, HyPix four-circle diffractometer with a micro-focus sealed X-ray tube using a mirror as monochromator and a HyPix detector. The diffractometer used  $\text{Cu } K_\alpha$  radiation ( $\lambda = 1.54184 \text{ \AA}$ ). All data were integrated with CrysAlisPro and a multi-scan absorption correction using SCALE3 ABSPACK was applied. The structure was solved by dual methods with SHELXT 2018/2 and refined by full-matrix least-squares methods against  $F^2$  using SHELXL 2018/3. The crystal structure has been deposited at the Cambridge Crystallographic Data Centre (CCDC 2430334).

**Table S9** Crystal data and structure refinement for **3s**

|                                                     |                                                                              |
|-----------------------------------------------------|------------------------------------------------------------------------------|
| CCDC number                                         | 2430334                                                                      |
| Empirical formula                                   | C <sub>17</sub> H <sub>14</sub> FNO <sub>4</sub> S                           |
| Formula weight                                      | 347.35                                                                       |
| Temperature [K]                                     | 293(2)                                                                       |
| Crystal system                                      | triclinic                                                                    |
| Space group                                         | P $\bar{1}$                                                                  |
| <i>a</i> [Å]                                        | 9.4933(3)                                                                    |
| <i>b</i> [Å]                                        | 9.7205(2)                                                                    |
| <i>c</i> [Å]                                        | 9.7983(2)                                                                    |
| $\alpha$ [°]                                        | 89.993(2)                                                                    |
| $\beta$ [°]                                         | 77.842(2)                                                                    |
| $\gamma$ [°]                                        | 70.533(2)                                                                    |
| Volume [Å <sup>3</sup> ]                            | 830.96(4)                                                                    |
| <i>Z</i>                                            | 2                                                                            |
| $\rho_{\text{calc}}$ [gcm <sup>-3</sup> ]           | 1.388                                                                        |
| $\mu$ [mm <sup>-1</sup> ]                           | 2.020                                                                        |
| <i>F</i> (000)                                      | 360                                                                          |
| Crystal size [mm <sup>3</sup> ]                     | 0.1×0.11×0.12                                                                |
| Radiation                                           | Cu <i>K</i> $\alpha$ ( $\lambda$ =1.54184 Å)                                 |
| 2 $\theta$ range [°]                                | 9.26 to 133.20 (0.84 Å)                                                      |
| Index ranges                                        | −11 ≤ <i>h</i> ≤ 11, −10 ≤ <i>k</i> ≤ 11, −11 ≤ <i>l</i> ≤ 11                |
| Reflections collected                               | 7922                                                                         |
| Independent reflections                             | 2896 [ <i>R</i> <sub>int</sub> = 0.0308, <i>R</i> <sub>sigma</sub> = 0.0356] |
| Data / Restraints / Parameters                      | 2896 / 27 / 247                                                              |
| Goodness-of-fit on <i>F</i> <sup>2</sup>            | 1.110                                                                        |
| Final <i>R</i> indexes [ <i>I</i> ≥ 2σ( <i>I</i> )] | <i>R</i> <sub>1</sub> = 0.0580, w <i>R</i> <sub>2</sub> = 0.1574             |
| Final <i>R</i> indexes [all data]                   | <i>R</i> <sub>1</sub> = 0.0612, w <i>R</i> <sub>2</sub> = 0.1623             |
| Largest peak/hole [eÅ <sup>-3</sup> ]               | 0.38/−0.48                                                                   |
